# Supplementary material for: Toxicogenomic Insights into Environmental Toxicant Exposures: The TaRGET II Resource
Source: Research Square preprint supplement (doi:10.21203/rs.3.rs-7285514/v1), 2025-08-20
Supplement: Supplementary file 1 [file 07bbf3aed6d9c7cedf8af9d3.xlsx]

## Sheet: Sheet1
	Tissue	Exposure	Sex	Differential Expression Gene (DEGs)		Differentail accessible regions (DARs)		Differential methylated regions (DMRs)
				Down-regulated	Up-regulated	More-close	More-open	Hypo-methylated	Hyper-methylated
	5 month blood	As	Female	111	250	N.D.	N.D.	46	51
			Male	533	374	N.D.	N.D.	44	78
		PM2.5-JHU	Female	823	1653	126	625	739	371
			Male	1514	1226	3428	2896	639	265
		BPA10mg	Female	1680	1425	2244	1833	46478	4350
			Male	242	481	1920	534	4132	2024
		BPA10ug	Female	953	191	2491	1272	888	421
			Male	136	258	1264	561	1846	1226
		DEHP	Female	6	30	113	29	164	116
			Male	28	44	9	39	55	145
		PM2.5-CHI	Female	30	31	5708	6780	N.D.	N.D.
			Male	609	521	117	384	N.D.	N.D.
		Pb	Female	27	45	28	70	72	122
			Male	130	60	8	89	68	87
		TBT	Female	690	635	427	2516	1837	542
			Male	1209	617	554	356	432	258
		TCDD	Female	15	162	658	786	173	201
			Male	59	32	105	89	46	165
