# Supplementary material for: Toxicogenomic Insights into Environmental Toxicant Exposures: The TaRGET II Resource
Source: Research Square preprint supplement (doi:10.21203/rs.3.rs-7285514/v1), 2025-08-20
Supplement: Supplementary file 2 [file 09454417fee83c080ba836a5.xlsx]

## Sheet: ATAC_All_samples
				TCDD		BPA			PM2.5-JHU		DEHP/Pb			PM2.5-CHI		TBT		Arsenic
Age	Tissue	Assay	Sex	Ctrl	TCDD	Ctrl	BPA10ug	BPA10mg	Ctrl	PM2.5	Ctrl	DEHP	Pb	Ctrl	PM2.5	Ctrl	TBT	Ctrl	As
weanling	Liver	ATAC	Female	6	6	5	6	5	6	5	6	6	7	11	12	6	6	7	7
			Male	6	6	5	6	6	5	5	7	6	6	12	12	6	6	9	6
	Blood	ATAC	Female						4	4
			Male						4	5
adult	Liver	ATAC	Female	6	6	6	5	6	9	8	5	5	6	6	6	6	6	7	6
			Male	6	6	6	6	6	9	7	6	7	6	6	5	6	6	6	6
	Blood	ATAC	Female	5	5	10	9	9	6	6	6	5	6	10	5	6	6
			Male	6	6	9	10	8	6	6	6	7	5	4	5	6	6
	Brain	ATAC	Female			4	3	3
			Male			4	4	4												Total:	638

## Sheet: RNA_all_samples
				TCDD		BPA			PM2.5-JHU		DEHP/Pb			PM2.5-CHI		TBT		Arsenic
Age	Tissue	Assay	Sex	Ctrl	TCDD	Ctrl	BPA10ug	BPA10mg	Ctrl	PM2.5	Ctrl	DEHP	Pb	Ctrl	PM2.5	Ctrl	TBT	Ctrl	As
Weanling	Liver	RNA	Female	6	6	6	6	6	6	6	7	6	7	12	12	7	7	6	6
			Male	6	6	6	7	6	6	6	7	6	7	12	12	7	7	6	6
	Blood	RNA	Female	6	6	6	6	6	6	6	7	6	7	6	6	1	4	6	6
			Male	6	5	7	7	6	6	6	7	6	7	6	6	4	4	6	6
	Heart	RNA	Female											6	6
			Male											6	6
	Lung	RNA	Female											6	6
			Male											6	6
adult	Liver	RNA	Female	6	6	6	6	6	6	6	6	5	6	6	6	6	7	6	6
			Male	6	6	6	6	6	6	6	6	7	6	6	5	6	7	7	7
	Blood	RNA	Female	6	6	8	5	7	6	6	6	5	6	6	6	6	8	6	6
			Male	6	6	6	6	6	6	6	6	7	6	6	5	6	6	6	9
	Brain	RNA	Female			6	6	5
			Male			5	6	6
	Lung	RNA	Female											6	6
			Male											6	5
aged	Liver	RNA	Female			3	3	2			5	4	5	6	6	5	5
			Male			7	7	6			5	4	4	5	5	6	18
	Blood	RNA	Female											6	6
			Male											6	5					Total:	1043

## Sheet: WGBS
				TCDD		BPA			PM2.5-JHU		DEHP/Pb			PM2.5-CHI		TBT		Arsenic
Age	Tissue	Assay	Sex	Ctrl	TCDD	Ctrl	BPA10ug	BPA10mg	Ctrl	PM2.5	Ctrl	DEHP	Lead	Ctrl	PM2.5	Ctrl	TBT	Ctrl	As
Adult	Liver	WGBS	Female	6	6	6	6	6	6	6	6	5	6	6	6	6	6	6	6
			Male	6	6	6	6	6	6	6	6	7	6	6	4	6	6	6	6
	Blood	WGBS	Female	6	6	6	6	6	4	6	6	5	6			5	6	6	6
			Male	6	6	6	6	6	6	6	6	7	6			4	6	6	5
	Cortex	WGBS	Female			6		6			6	5	6
			Male			6		6			6	7	6
	Ear	WGBS	Female											6	5
			Male											6	5
	Hypothalamus	WGBS	Female						6	6
			Male						6	6										Total:	458

## Sheet: RRBS
				TCDD		BPA			PM2.5-JHU		DEHP/Pb			PM2.5-CHI		TBT		Arsenic
Age	Tissue	Assay	Sex	Ctrl	TCDD	Ctrl	BPA10ug	BPA10mg	Ctrl	PM2.5	Ctrl	DEHP	Pb	Ctrl	PM2.5	Ctrl	TBT	Ctrl	As
Adult	Liver	RRBS	Female								6	5	6
			Male								5	7	6
	Blood	RRBS	Female								6	5	6
			Male								6	7	6								71

## Sheet: Infinium_Array
Tissue	Age	Sex	CONTROL	DEHP	LEAD	BPA-10ug	PM2.5-JHU	TBT	TCDD	BPA-10mg
BLOOD	10MONTH	F	26	12	14				12	4
		M	34	12	14	2		16	12	2
CORTEX	10MONTH	F	56	12	14	12	8	10	12	12
		M	56	12	12	12	12	24	12	12
	5MONTH	F	56	8	12	12	12	8	12	14
		M	60	14	12	10	12	16	12	14
	12WEEKS	F	6
		M
	26WEEKS	F	6
		M									Total:	744

## Sheet: ChIP_Active_Marker
				TCDD		BPA			PM2.5-JHU		DEHP/Pb			PM2.5-CHI			TBT
Age	Tissue	Marks	Sex	Ctrl	TCDD	Ctrl	BPA10mg	BPA10ug	Ctrl	PM2.5	Ctrl	DEHP	Pb	Ctrl	PM2.5		Age	Tissue	Marks	Sex	Year	Ctrl	TBT
5 Week	Liver	H3K4me1	Female	NA	NA	NA	NA	NA	NA	NA	NA	NA	NA	NA	NA		20 Week	Liver	H3K4me1	Male	2018	6	6
	Liver		Male	5	5	NA	NA	NA	NA	NA	NA	NA	NA	NA	NA			Liver		Male	2021	3	5
	Liver	H3K4me3	Female	NA	NA	NA	NA	NA	NA	NA	NA	NA	NA	NA	NA			Liver		Male	2022	0	6
	Liver		Male	7	6	NA	NA	NA	NA	NA	NA	NA	NA	NA	NA			Liver	H3K4me3	Male	2018	6	6
	Liver	H3K27ac	Female	NA	NA	NA	NA	NA	NA	NA	NA	NA	NA	NA	NA			Liver		Male	2021	3	5
	Liver		Male	6	6	NA	NA	NA	NA	NA	NA	NA	NA	NA	NA			Liver		Male	2022	0	8
20 Week	Liver	H3K4me1	Female	NA	NA	NA	NA	NA	4	5	6	5	6	6	6			Liver	H3K27ac	Male	2018	6	6
	Liver		Male	6	6	6	5	6	6	6	6	7	6	6	5			Liver		Male	2021	3	5
	Liver	H3K4me3	Female	NA	NA	NA	NA	NA	6	6	6	5	6	6	6			Liver		Male	2022	0	8
	Liver		Male	6	6	6	6	6	6	6	5	7	6	6	5
	Liver	H3K27ac	Female	NA	NA	NA	NA	NA	5	6	6	5	6	6	6
	Liver		Male	6	6	6	6	6	6	5	6	7	6	6	5
40 Week	Liver	H3K4me1	Female	NA	NA	NA	NA	NA	NA	NA	NA	NA	NA	NA	NA
	Liver		Male	6	4	NA	NA	NA	NA	NA	NA	NA	NA	NA	NA
	Liver	H3K4me3	Female	NA	NA	NA	NA	NA	NA	NA	NA	NA	NA	NA	NA
	Liver		Male	5	6	NA	NA	NA	NA	NA	NA	NA	NA	NA	NA
	Liver	H3K27ac	Female	NA	NA	NA	NA	NA	NA	NA	NA	NA	NA	NA	NA
	Liver		Male	6	6	NA	NA	NA	NA	NA	NA	NA	NA	NA	NA								482

## Sheet: ChIP_Repressive_Marker
				TCDD		BPA			PM2.5-JHU		DEHP/Pb			PM2.5-CHI		TBT
Age	Tissue	Marks	Sex	Ctrl	TCDD	Ctrl	BPA10mg	BPA10ug	Ctrl	PM2.5	Ctrl	DEHP	Pb	Ctrl	PM2.5	Ctrl	TBT
3 Week	Liver	H3K9me3	Female	NA	NA	NA	NA	NA	NA	NA	NA	NA	NA	NA	NA	4	4
	Liver		Male	NA	NA	NA	NA	NA	NA	NA	NA	NA	NA	NA	NA	3	6
	Liver	H3K27me3	Female	NA	NA	NA	NA	NA	NA	NA	NA	NA	NA	NA	NA	4	4
	Liver		Male	NA	NA	NA	NA	NA	NA	NA	NA	NA	NA	NA	NA	3	5
20 Week	Liver	H3K9me3	Female	NA	NA	NA	NA	NA	NA	NA	NA	NA	NA	NA	NA	NA	NA
	Liver		Male	6	6	5	3	4	6	6	6	5	6	6	5	2	13
	Liver	H3K27me3	Female	NA	NA	NA	NA	NA	NA	NA	NA	NA	NA	NA	NA	NA	NA
	Liver		Male	6	6	5	1	3	6	1	3	1	6	6	5	3	13		177
