# Supplementary material for: Toxicogenomic Insights into Environmental Toxicant Exposures: The TaRGET II Resource
Source: Research Square preprint supplement (doi:10.21203/rs.3.rs-7285514/v1), 2025-08-20
Supplement: Supplementary file 3 [file 288431c63da65173d603eea3.xlsx]

## Sheet: As
sexF_in_up_expoF

## Sheet: BPA10mg
sexF_in_up_expoF

## Sheet: BPA10ug
sexF_in_up_expoF

## Sheet: DEHP
sexF_in_up_expoF

## Sheet: Pb
sexF_in_up_expoF

## Sheet: PM2.5_JHU
sexF_in_up_expoF

## Sheet: PM2.5_CHI
sexF_in_up_expoF

## Sheet: TBT
sexF_in_up_expoF

## Sheet: TCDD
sexF_in_up_expoF
