# Supplementary material for: Toxicogenomic Insights into Environmental Toxicant Exposures: The TaRGET II Resource
Source: Research Square preprint supplement (doi:10.21203/rs.3.rs-7285514/v1), 2025-08-20
Supplement: Supplementary file 4 [file 3b9d57fb657034c2aa35302c.xlsx]

## Sheet: RNA-seq
	QC parameter	Value Cutoff	Score: >= cutoff	Score: <cutoff
	uniq_ratio	0.35	1	0
	assign_reads	10000000	1	0
	genes_w_CPM_gt1	9000	1	0
	uniq_ratio: The ratio of uniquely mapped reads number after alignment against reference genome to the total input reads number for alignment.
	assign_reads: The number of reads that were assigned to genes provided by GENCODE vM20 gene annotation file.
	genes_w_CPM_gt1: The number of expressed genes with CPM value larger than 1.
	Sum of QC score >=3 as good quality of RNA-seq

## Sheet: ATAC-seq
	QC parameter	Value Cutoff	QC score
	single end	>=40000000	2
		[25000000, 40000000)	1
		<25000000	-1
	rup	>=0.2	2
		[0.12, 0.2)	1
		<0.12	-1
	enrp	>=11	2
		[7, 11)	1
		<7	-1
	enrs	>=18	2
		[15, 18)	1
		<15	-1
	bk	<=10	2
		(10, 20]	1
		>20	-1
	single_end: Useful single ends: the total number of useful single ends. This is each end of a non-redundant uniquely mapped read pair.
	enrp: The promoters of active genes provide a positive control for open chromatin regions. The ATAC-seq useful ends (E) enriched on detected promoters (overlapping ATAC-seq peaks) are used as a QC metric to measure the signal enrichment.
	enrs: The ATAC-seq signal (useful ends) enriched on the detected ATAC-seq peaks is used as a QC metric to measure the signal enrichment at the genome-wide level. To avoid sequencing-depth bias, 10 million useful ends (E) are sampled from the complete dataset, and peak calling is performed to identify the open chromatin regions. enrs is calculated after 10 million pseudo counts are added into the …
	rup: The percentage of all useful ends that fall into the called peak regions with at least 50% overlap.
	bk: Fifty thousand genomic regions (500bp each) are randomly selected from the genome outside of ATAC-seq peaks. The ATAC-seq signal in each region is calculated as reads per kilobase per million mapped reads (RPKM). The percentage of all such regions with the ATAC-seq signal over the theoretical threshold (RPKM=0.377) is considered high-background and used as a QC metric to indicate the backgrou…
	Sum of QC score >=5 as good quality of ATAC-seq

## Sheet: ChIP-seq
	QC parameter	Value Cutoff	QC score
	Non-redundant unique mapped reads (NRUR, million)	≥ 40	2
		20 ≤ NRUR < 40	1
		< 20	0
	Non-Redundant Fraction (NRF)	≥ 0.8	2
		0.5 ≤ NRF < 0.8	1
		< 0.5	0
	PCR Bottlenecking Coefficient1 (PBC1)	≥ 0.8	2
		0.5 ≤ PBC1 < 0.8	1
		< 0.5	0
	PCR Bottlenecking Coefficient2 (PBC2)	≥ 3	2
		1 ≤ PBC < 3	1
		< 1	0
	Ratio of reads under the Peak (RUP)	≥ 20	2
		12 ≤ RUP < 20	1
		< 12	0
	NRUR: number of Non-redundant unique mapped reads
	NRF: Number of non-redundant uniquely mapping reads / Total number of mapped reads
	PBC1: PBC1 = M1/MDISTINCT , where M1: Number of non-redundant uniquely mapped reads; MDISTINCT: Total uniquely mapped reads.
	PBC2: PBC2 = M1/M2, where M1: Genomic length where only one read maps uniquely; M2: Genomic length where two reads map uniquely.
	RUP: RUP=RPEAK/RTOTAL, where RPEAK: Number of reads that at least 50% fraction of the Read overlap with Peak; RTOTAL: Total number of non-redundant uniquely mapped reads

## Sheet: WGBS
	QC parameter	Value Cutoff
	Number of CpG that coverage≥10X	15000000
	Fraction of CpGs with methylation level > 0.7	0.6
