# Supplementary material for: Toxicogenomic Insights into Environmental Toxicant Exposures: The TaRGET II Resource
Source: Research Square preprint supplement (doi:10.21203/rs.3.rs-7285514/v1), 2025-08-20
Supplement: Supplementary file 5 [file 6ce919451a5cd8d68130447c.xlsx]

## Sheet: Expression pat
Female expression patterns	BPA10mg	BPA10ug	DEHP	Pb	PM2.5_Chi	TBT
F_1	0.211814	0.22852	0.353222	0.379475	0.252983	0.240453
F_2	0.56993	0.432401	0.4662	0.531469	0.351981	0.367133
F_3	0.373147	0.309615	0.343499	0.319356	0.332063	0.257094
F_4	0.473469	0.392857	0.607143	0.55102	0.504082	0.384694
F_5	0.265928	0.387812	0.460757	0.54386	0.43121	0.320406
F_6	0.416545	0.38653	0.305271	0.513909	0.52489	0.409224
F_7	0.413002	0.449331	0.355641	0.512428	0.426386	0.342256		>50%
F_8	0.409729	0.458372	0.391955	0.478952	0.440599	0.382601
F_9	0.501024	0.55551	0.448177	0.408849	0.312577	0.390823
Male expression patterns	BPA10mg	BPA10ug	DEHP	Pb	PM2.5_Chi	TBT
M_1	0.216878	0.273418	0.411392	0.476793	0.375949	0.394937
M_2	0.589686	0.484305	0.835575	0.770553	0.411809	0.284753
M_3	0.4375	0.228966	0.596755	0.557091	0.321514	0.31851
M_4	0.449339	0.528634	0.87812	0.901615	0.666667	0.546256
M_5	0.651466	0.560261	0.85342	0.915309	0.257329	0.602606
M_6	0.478114	0.289562	0.477441	0.647811	0.382492	0.443771
M_7	0.603107	0.475989	0.748588	0.810734	0.233051	0.423729
M_8	0.36722	0.349931	0.497925	0.538036	0.378976	0.392116
M_9	0.49219	0.515446	0.605345	0.63589	0.552239	0.563346
