# Supplementary material for: Toxicogenomic Insights into Environmental Toxicant Exposures: The TaRGET II Resource
Source: Research Square preprint supplement (doi:10.21203/rs.3.rs-7285514/v1), 2025-08-20
Supplement: Supplementary file 6 [file 741f8c52d99015d837306f1c.xlsx]

## Sheet: DEG
		3 weeks liver		20 weeks liver		40 weeks liver
		Female	Male	Female	Male	Female	Male
Shared DEGs	Multiple	332	884	898	761	432	672
Exposure specific DEGs	TCDD	295	155	123	118
	BPA10mg	16	1	17	107	238	92
	BPA10ug	38	5	89	61	13	48
	PM2.5-JHU	235	150	283	831
	DEHP	109	303	98	82	171	989
	Pb	57	247	230	157	553	2170
	PM2.5-CHI	19	90	60	160	537	441
	TBT	46	16	136	203	8	9
	As	1201	1785	1467	230

## Sheet: DAR
		3 weeks liver		20 weeks liver
		Female	Male	Female	Male
Shared DARs	Multiple	1810	1803	4399	10965
Exposure specific DARs	TCDD	1708	2182	822	1383
	BPA10mg	2323	3316	3029	2100
	BPA10ug	3275	319	1041	7074
	PM2.5-JHU	2079	1097	455	788
	DEHP	233	89	77	23
	Pb	154	182	57	74
	PM2.5-CHI	78	1918	828	2268
	TBT	306	608	1570	2076
	As	450	6103	10071	1129

## Sheet: DMR
		20 weeks liver
		Female	Male
Shared DARs	Multiple	4419	2032
Exposure specific DARs	TCDD	810	1533
	BPA10mg	816	1714
	BPA10ug	1240	796
	PM2.5-JHU	2275	1733
	DEHP	217	273
	Pb	193	195
	PM2.5-CHI	1556	850
	TBT	29983	5273
	As	1884	2007

## Sheet: Total_Number
	Tissue	Exposure	Sex	Differential Expression Gene (DEGs)		Differentail accessible regions (DARs)		Differential methylated regions (DMRs)
				Down-regulated	Up-regulated	More-close	More-open	Hypo-methylated	Hyper-methylated
	3 weeks liver	As	Female	594	758	285	292
			Male	1001	1281	613	6543				>70% of total changes
		PM2.5-JHU	Female	204	159	1280	1135
			Male	99	173	483	870
		BPA10mg	Female	8	22	2672	922
			Male	8	2	1122	3145
		BPA10ug	Female	31	54	4064	568
			Male	11	5	91	477
		DEHP	Female	86	136	205	163
			Male	345	489	93	69
		PM2.5-CHI	Female	11	27	15	80
			Male	76	84	1651	723
		Pb	Female	99	41	76	198
			Male	302	480	73	237
		TBT	Female	44	28	194	198
			Male	19	19	729	102
		TCDD	Female	143	286	273	1735
			Male	107	194	474	2086
	20 weeks liver	As	Female	886	1158	3518	9959	386	3927
			Male	220	182	642	2529	414	2226
		PM2.5-JHU	Female	204	428	380	320	3513	102
			Male	682	591	1343	123	2060	265
		BPA10mg	Female	15	79	2671	2956	1324	263
			Male	100	156	10085	359	1284	1475
		BPA10ug	Female	119	104	720	969	1868	306
			Male	50	119	11533	4668	1111	255
		DEHP	Female	98	154	68	75	147	141
			Male	86	102	6	41	126	249
		PM2.5-CHI	Female	50	92	1050	996	2639	145
			Male	203	142	3507	235	870	315
		Pb	Female	185	250	11	94	112	135
			Male	198	162	106	78	83	164
		TBT	Female	215	210	1008	1236	17016	15859
			Male	237	230	2961	380	1473	4737
		TCDD	Female	133	188	509	811	572	510
			Male	169	115	1113	1332	1030	793
	40 weeks liver	BPA10mg	Female	130	223
			Male	104	104
		BPA10ug	Female	20	4
			Male	53	87
		DEHP	Female	253	206
			Male	199	1137
		PM2.5-CHI	Female	309	364
			Male	317	462
		Pb	Female	556	364
			Male	1359	1329
		TBT	Female	5	7
			Male	12	8
