# Supplementary material for: Toxicogenomic Insights into Environmental Toxicant Exposures: The TaRGET II Resource
Source: Research Square preprint supplement (doi:10.21203/rs.3.rs-7285514/v1), 2025-08-20
Supplement: Supplementary file 7 [file 83be9a13fae095f3b80b539e.xlsx]

## Sheet: liver
FvsM
name	log2FoldChange	padj	stage		name	log2FoldChange	padj	stage		name	log2FoldChange	padj	stage
Acot3	1.2557	3.93821e-11	3w		1810053B23Rik	1.18651	2.68995e-11	5m		1810032O08Rik	1.06091	8.34751e-34	10m
Akr1b7	1.00005	6.33129e-20	3w		2310034O05Rik	1.01764	1.24708e-09	5m		1810053B23Rik	1.32904	3.2802e-08	10m
Ckmt2	1.31116	1.40021e-06	3w		4732463B04Rik	1.10226	2.34409e-21	5m		2310034O05Rik	2.07989	6.72958e-16	10m
Cux2	1.50525	4.89511e-20	3w		9030619P08Rik	3.24278	1.47236e-216	5m		4732463B04Rik	1.69352	1.90772e-16	10m
Cyp2b13	1.04917	6.15018e-25	3w		A1bg	9.1061	0	5m		4930458D05Rik	1.27724	1.65738e-09	10m
Cyp3a16	2.04108	4.49834e-32	3w		Abca3	1.05765	9.42814e-242	5m		9030619P08Rik	3.11541	5.14763e-93	10m
Cyp3a41a	2.25797	1.65677e-31	3w		Abcb1a	2.04599	7.26022e-118	5m		9930014A18Rik	1.35916	2.33899e-16	10m
Cyp3a41b	2.49053	1.00469e-71	3w		Abcc4	1.07037	9.85157e-65	5m		A1bg	10.4528	8.54675e-215	10m
Cyp3a44	1.05376	5.06517e-14	3w		Abcd2	2.70189	1.71682e-171	5m		Abcb1a	2.04498	2.20131e-52	10m
Cyp3a63-ps	2.22427	9.60279e-39	3w		Abhd2	1.19544	5.8727e-81	5m		Abcc4	1.27469	1.48769e-19	10m
Fabp3	1.19112	2.93222e-06	3w		AC154912.1	2.08701	1.65511e-93	5m		Abcd2	2.41153	1.21249e-53	10m
Gm26669	1.12148	4.62896e-20	3w		Acnat2	1.91837	4.38307e-72	5m		AC140346.1	1.03037	7.84678e-10	10m
Gm27483	2.39995	4.12675e-72	3w		Acot1	1.10306	1.24742e-16	5m		AC154912.1	2.36004	7.86182e-62	10m
Gm27786	2.03164	2.01296e-73	3w		Acot3	4.07078	1.92041e-123	5m		Acaca	1.71974	2.08878e-33	10m
Gm44662	1.56152	4.31481e-63	3w		Acot4	1.81447	3.27952e-116	5m		Acacb	1.42893	2.35645e-17	10m
Gm48342	1.21471	4.5999e-38	3w		Acss3	2.11552	5.31093e-149	5m		Acly	1.13363	1.06925e-12	10m
Gm8623	1.02054	3.68915e-24	3w		Adamts6	1.05358	2.58751e-17	5m		Acnat2	1.44518	3.26497e-21	10m
Hist1h1a	1.08025	3.21211e-18	3w		Adrb2	1.1333	9.52425e-35	5m		Acot3	3.38364	1.52294e-26	10m
Hist1h2ak	1.15151	1.15474e-31	3w		Akr1b7	2.51256	2.90726e-70	5m		Acot4	1.2768	8.60243e-18	10m
Hist1h2bb	1.06602	1.09769e-23	3w		Akr1c18	1.4799	1.42688e-25	5m		Acpp	1.2845	3.8851e-09	10m
Hist1h3f	1.06706	1.14048e-25	3w		Aldh3b3	4.05301	1.16634e-167	5m		Acss2	1.20305	6.69131e-17	10m
Hist1h4f	1.15785	5.16212e-32	3w		Amigo2	1.01497	2.50861e-84	5m		Acss3	1.30955	7.191e-19	10m
Mb	1.08082	0.00197686	3w		Ankrd55	1.35002	5.72236e-23	5m		Adamts6	1.11394	1.3106e-25	10m
Myh2	1.61345	6.81048e-09	3w		Arrdc4	1.16064	1.57247e-99	5m		Adamtsl1	1.072	1.40304e-17	10m
n-R5-8s1	1.5859	1.86647e-49	3w		Atp2b2	1.28069	5.70735e-50	5m		Adcy1	3.20788	2.65858e-45	10m
Orm2	1.37195	1.41004e-12	3w		Atp6v0d2	2.57012	5.66542e-97	5m		Adrb2	1.06905	3.24213e-12	10m
Sult2a3	1.69758	1.47525e-35	3w		Cables1	1.4524	7.36816e-68	5m		Akr1b7	3.49636	1.04844e-51	10m
Tcap	1.01301	0.000368187	3w		Car2	1.17921	3.4055e-91	5m		Aldh3b3	4.8872	3.34335e-81	10m
Tnnc2	1.58578	5.06533e-08	3w		Ccnd1	1.70798	7.92519e-67	5m		Ankrd55	1.65152	4.07131e-14	10m
Zbed4-ps1	1.25789	1.66626e-18	3w		Cers6	1.25833	1.06967e-59	5m		Aph1b	1.01079	9.40658e-25	10m
AC129539.1	-1.20758	5.01346e-54	3w		Ces1c	1.02907	1.05432e-206	5m		Aph1c	1.31749	1.10923e-20	10m
Atp6v0c-ps2	-1.37122	3.33987e-52	3w		Cnst	1.0232	1.62903e-131	5m		Arrdc4	1.23854	1.76225e-45	10m
Cela2a	-2.08677	3.81866e-52	3w		Corin	2.31707	5.04488e-51	5m		Art2b	1.37143	1.80211e-12	10m
Ces4a	-1.20302	1.25123e-12	3w		CT010467.1	1.28741	2.76538e-14	5m		Atp2b2	1.22759	4.63717e-12	10m
Cib3	-1.18352	3.62931e-11	3w		Cux2	6.08598	0	5m		Atp6v0d2	1.80794	9.68544e-12	10m
Cpa1	-3.69366	5.9934e-83	3w		Cxcl13	2.49452	2.85453e-32	5m		Batf	1.02911	4.20729e-12	10m
Cpb1	-4.20813	1.78831e-98	3w		Cyp17a1	2.30095	3.4242e-86	5m		BC028528	1.13171	1.07493e-25	10m
Ctrb1	-4.86615	2.88534e-107	3w		Cyp2a22	5.81716	0	5m		BC035044	1.35182	2.35225e-16	10m
Cyp4a12a	-2.59649	2.80626e-48	3w		Cyp2a4	7.02162	8.08445e-294	5m		Bcl2a1a	1.36847	1.47822e-08	10m
Derl3	-1.16688	3.58109e-08	3w		Cyp2a5	1.52295	3.2618e-36	5m		Bcl2a1b	1.03468	3.43413e-07	10m
Elovl3	-1.00892	5.4908e-08	3w		Cyp2b10	4.05287	3.72196e-89	5m		Bcl2a1d	1.64391	1.92602e-17	10m
Ftl1-ps1	-1.35736	1.71051e-108	3w		Cyp2b13	9.87993	0	5m		Bmper	1.61053	5.84258e-29	10m
Gm10335	-1.71163	1.06969e-85	3w		Cyp2b9	8.74034	0	5m		C130026I21Rik	1.19119	5.71317e-10	10m
Gm10800	-1.06178	3.49709e-07	3w		Cyp2c37	2.24984	2.36673e-214	5m		Cables1	1.46941	3.59386e-21	10m
Gm10801	-1.0407	9.48109e-14	3w		Cyp2c38	2.54493	6.41721e-75	5m		Caprin2	1.5068	2.22042e-34	10m
Gm11824	-1.12298	5.72145e-42	3w		Cyp2c39	3.17956	3.35702e-214	5m		Car2	1.39597	1.54527e-46	10m
Gm11878	-1.18378	4.92502e-42	3w		Cyp2c40	5.58027	0	5m		Ccdc68	1.23117	2.02516e-42	10m
Gm12191	-1.20775	2.03406e-45	3w		Cyp2c68	1.33891	4.74607e-117	5m		Ccl9	1.06524	4.64585e-44	10m
Gm12352	-1.02846	1.01336e-28	3w		Cyp2c69	7.35726	0	5m		Ccnd1	2.04767	6.05515e-80	10m
Gm13050	-1.00384	4.71431e-31	3w		Cyp2g1	2.86127	4.23565e-134	5m		Cd1d2	1.11469	4.1956e-08	10m
Gm13493	-1.26591	9.90513e-61	3w		Cyp39a1	1.65813	1.62648e-134	5m		Cd300lf	1.28107	9.0986e-12	10m
Gm15285	-2.04494	1.38161e-88	3w		Cyp3a16	8.29998	0	5m		Cd3d	1.11767	1.83119e-11	10m
Gm15611	-1.12503	3.5652e-08	3w		Cyp3a41a	9.17563	0	5m		Cd3g	1.05448	1.9008e-15	10m
Gm15682	-1.68314	1.40572e-87	3w		Cyp3a41b	6.86388	1.37285e-218	5m		Cd40	1.02813	5.29628e-15	10m
Gm17241	-1.06006	1.20063e-27	3w		Cyp3a44	8.42012	0	5m		Cd63	1.04264	1.37199e-21	10m
Gm17541	-1.39967	5.38975e-41	3w		Cyp3a63-ps	4.62918	5.97694e-151	5m		Cdkn2c	1.41339	3.64697e-113	10m
Gm1821	-1.07172	8.76774e-40	3w		Cyp4a10	1.49142	5.04189e-22	5m		Cers6	1.3315	8.62983e-23	10m
Gm21320	-2.52733	6.01771e-35	3w		Cyp4a14	2.35581	8.85902e-25	5m		Chmp4c	1.05923	9.78647e-22	10m
Gm21738	-1.26473	2.69372e-20	3w		Dio3os	2.34207	7.86455e-64	5m		Chrna4	1.6898	2.21105e-08	10m
Gm3839	-1.07484	7.48024e-20	3w		Disp2	1.202	1.61168e-49	5m		Clec7a	1.33281	9.03552e-16	10m
Gm4294	-1.07331	1.99613e-38	3w		Dll1	1.02192	1.50008e-69	5m		Col20a1	1.01573	7.01869e-09	10m
Gm45113	-1.59879	1.62855e-66	3w		Eci3	5.14577	1.62367e-243	5m		Corin	2.64295	1.95728e-27	10m
Gm4540	-1.05258	2.20911e-22	3w		Emp2	1.09219	8.28739e-123	5m		Crym	1.13456	3.67518e-13	10m
Gm4824	-1.84455	2.3414e-59	3w		Ephb6	1.13191	6.48262e-28	5m		CT010467.1	1.7716	7.9876e-17	10m
Gm5452	-1.50993	3.69054e-55	3w		Espn	1.05448	1.39145e-19	5m		Cux2	5.79558	3.49406e-185	10m
Gm5558	-2.41118	3.53821e-124	3w		Esr1	1.02787	4.64845e-61	5m		Cxcl13	1.38131	8.36395e-05	10m
Gm5835	-1.14828	1.13987e-43	3w		Esrrg	1.61564	2.96292e-49	5m		Cxcl9	1.17671	1.12203e-23	10m
Gm5855	-1.0481	6.39358e-28	3w		Evc	1.30855	3.56981e-88	5m		Cxcr4	1.07332	3.04625e-14	10m
Gm5869	-2.11925	3.11308e-137	3w		Evc2	1.27574	7.12273e-79	5m		Cxcr6	1.08486	3.02241e-13	10m
Gm6063	-1.51451	1.18275e-52	3w		Fam110c	1.15565	1.38885e-33	5m		Cyba	1.00995	1.66811e-33	10m
Gm6745	-1.09788	3.20077e-32	3w		Fam19a2	3.26339	3.98699e-85	5m		Cyp17a1	2.61182	2.94833e-43	10m
Gm7384	-1.02066	9.37193e-39	3w		Fam84b	2.27557	3.68578e-257	5m		Cyp2a22	4.96135	2.58211e-85	10m
Gm8355	-1.06772	2.81449e-28	3w		Fkbp5	1.08184	2.76244e-29	5m		Cyp2a4	8.50716	2.32225e-160	10m
Gm9247	-2.26049	9.88295e-95	3w		Flvcr2	1.2402	3.807e-63	5m		Cyp2b10	3.70902	1.20167e-32	10m
Gm9826	-1.33975	2.07251e-78	3w		Fmo1	1.23163	9.42041e-224	5m		Cyp2b13	9.71158	0	10m
Hsd3b5	-2.19709	1.88909e-44	3w		Fmo2	2.39173	1.11424e-175	5m		Cyp2b9	6.7311	1.13982e-60	10m
mt-Atp6	-1.11211	1.47019e-36	3w		Fmo3	9.54263	0	5m		Cyp2c37	1.31545	1.5665e-20	10m
Mup20	-2.08982	1.32928e-63	3w		Gadd45b	1.19741	3.76355e-22	5m		Cyp2c38	1.99621	7.73043e-23	10m
Mup3	-1.12325	1.604e-11	3w		Gbp3	1.27141	3.82067e-64	5m		Cyp2c39	2.8662	1.83674e-47	10m
Pnlip	-4.69113	1.54431e-121	3w		Gimap8	1.04622	1.87914e-77	5m		Cyp2c40	5.79622	0	10m
Prss2	-4.15139	3.04292e-94	3w		Gm11695	2.34711	1.32229e-92	5m		Cyp2c68	1.10698	6.64485e-84	10m
Reg1	-3.3633	2.04719e-48	3w		Gm11837	1.00213	1.1657e-73	5m		Cyp2c69	7.85721	0	10m
Rpl17-ps4	-1.28668	2.69978e-56	3w		Gm1600	1.30345	1.76947e-18	5m		Cyp2g1	2.80419	3.5777e-44	10m
Rpl30-ps1	-1.7419	3.78128e-81	3w		Gm42375	4.13476	1.03079e-163	5m		Cyp39a1	1.07891	2.32021e-22	10m
Rpl31-ps11	-1.02089	6.67132e-24	3w		Gm44787	1.44086	3.32783e-53	5m		Cyp3a16	9.74999	6.8277e-192	10m
Rps2-ps10	-1.28416	7.78674e-50	3w		Gm6135	4.42779	0	5m		Cyp3a41a	11.0609	0	10m
Serpina1e	-1.60025	5.11314e-22	3w		Gm7463	1.0053	1.9007e-28	5m		Cyp3a41b	9.2883	1.7497e-122	10m
Serpina4-ps1	-2.37929	7.37269e-35	3w		Gpat3	1.41644	1.21321e-48	5m		Cyp3a44	9.60275	1.20618e-198	10m
Serpina9	-1.39969	1.74642e-18	3w		Greb1l	1.811	1.15354e-54	5m		Cyp3a59	1.75077	4.36163e-54	10m
Slco1a1	-2.86954	4.92142e-44	3w		Grid1	1.21112	2.96165e-36	5m		Cyp3a63-ps	6.12753	1.0656e-72	10m
					Gstt3	1.45695	1.04841e-113	5m		Cyp4f16	1.15133	4.03673e-24	10m
					Gypc	1.28022	5.0678e-134	5m		Defb1	1.2798	9.63814e-14	10m
					Hamp2	4.63382	2.01569e-141	5m		Dio3os	2.45903	9.93024e-21	10m
					Hao2	7.23153	0	5m		Disp2	1.38667	1.81308e-16	10m
					Hexb	1.33457	4.98664e-206	5m		Dntt	1.12002	3.22311e-14	10m
					Hsd17b6	1.59556	9.51205e-50	5m		Dqx1	1.12281	6.21991e-49	10m
					Id4	1.01765	1.86854e-32	5m		Dynlt1f	1.05994	8.43013e-13	10m
					Igtp	1.04911	1.20069e-51	5m		Eci3	6.49265	1.30919e-122	10m
					Il15	1.01529	5.25056e-39	5m		Elovl6	1.46472	2.74926e-17	10m
					Ildr2	1.86816	3.00887e-132	5m		Emp2	1.29839	7.87604e-67	10m
					Lepr	2.03252	2.01715e-44	5m		Esm1	1.25943	6.66886e-12	10m
					Lmod3	1.03786	1.42872e-12	5m		Espn	1.10528	8.18682e-08	10m
					Marco	1.31531	1.20058e-10	5m		Esr1	1.07367	1.65186e-29	10m
					Mgst3	1.00924	8.34841e-46	5m		Esrrg	1.26391	2.95047e-14	10m
					Mme	1.01016	2.93241e-66	5m		Evc	1.55025	1.08626e-43	10m
					Msmp	1.22762	9.94753e-28	5m		Evc2	1.73465	6.83533e-64	10m
					Mt2	1.00742	0.000321798	5m		Evi2a	1.12617	1.42913e-28	10m
					Ncmap	1.53675	7.50801e-57	5m		Fabp5	1.59129	2.18315e-08	10m
					Nipal1	2.04642	3.18579e-54	5m		Fam110c	1.41572	1.00067e-11	10m
					Nqo1	1.03196	4.94505e-45	5m		Fam126a	1.03152	5.52701e-31	10m
					Nrp2	1.13442	4.37554e-132	5m		Fam19a2	4.59685	4.45878e-75	10m
					Nt5e	3.37179	0	5m		Fam84b	2.35814	7.90321e-126	10m
					Ntrk2	1.74297	3.27952e-39	5m		Fasn	1.95979	3.02123e-28	10m
					Orm3	1.13687	1.00568e-11	5m		Fmo2	2.0981	6.30624e-35	10m
					Papss2	1.01891	6.57324e-137	5m		Fmo3	9.11245	1.09665e-195	10m
					Pcp4l1	2.29954	3.5992e-222	5m		Fmo4	1.20024	1.29407e-42	10m
					Per3	1.00384	4.83256e-09	5m		Fut8	1.00395	1.02224e-40	10m
					Pla2g16	1.02467	4.0598e-73	5m		Gabbr2	1.09365	8.01039e-28	10m
					Plek2	1.1519	6.13707e-33	5m		Gadd45b	1.17962	7.19468e-10	10m
					Pnpla3	1.6386	4.56997e-24	5m		Gbp2	1.09681	1.11906e-20	10m
					Prlr	2.56402	4.38891e-159	5m		Gbp3	1.53923	1.62271e-43	10m
					Prom1	2.08296	6.31501e-70	5m		Gbp7	1.02026	3.43258e-25	10m
					Ptgds	1.50972	4.68649e-40	5m		Gimap3	1.22681	4.84158e-20	10m
					Pygo1	2.35895	1.69788e-103	5m		Gimap7	1.18596	4.944e-16	10m
					Qpct	1.15791	3.92755e-219	5m		Gimap8	1.67928	3.5567e-81	10m
					Rad51b	2.92372	2.03081e-116	5m		Gm11695	2.35531	6.17002e-24	10m
					Rcan2	1.65249	9.50996e-91	5m		Gm11837	1.26982	7.05024e-39	10m
					Rdh16f2	1.6337	0	5m		Gm12250	1.12903	7.42964e-13	10m
					Rdh9	1.34757	3.16878e-56	5m		Gm13215	1.1177	8.52353e-11	10m
					Rgs16	1.92619	5.52397e-21	5m		Gm13775	1.19457	2.09576e-10	10m
					Rsph4a	3.17064	2.23156e-157	5m		Gm13855	2.60557	1.67693e-39	10m
					Rtn4	1.06541	4.41553e-177	5m		Gm20337	1.07063	7.93811e-22	10m
					Sall1	1.38344	6.10603e-182	5m		Gm20559	1.25121	5.65021e-42	10m
					Sbk1	1.12835	5.67109e-54	5m		Gm28086	2.54316	6.62182e-56	10m
					Serpina6	1.52131	2.35593e-129	5m		Gm2830	1.05637	4.31064e-18	10m
					Serpinb1a	2.06479	4.18533e-93	5m		Gm28548	2.86809	8.70965e-27	10m
					Serpinb8	1.08119	9.54559e-48	5m		Gm33370	2.07987	1.16094e-27	10m
					Setbp1	1.74183	6.11392e-63	5m		Gm33543	1.02461	7.87975e-09	10m
					Sh2d4a	1.21048	8.71485e-86	5m		Gm35035	1.80203	2.12297e-25	10m
					Slc16a5	1.91282	1.00061e-82	5m		Gm42047	1.48166	2.33958e-15	10m
					Slc16a7	1.37008	4.54539e-133	5m		Gm42375	5.12598	4.26893e-97	10m
					Slc22a26	7.35682	0	5m		Gm43449	1.31617	1.97745e-57	10m
					Slc22a27	5.61875	0	5m		Gm44662	3.37997	3.04753e-34	10m
					Slc22a29	2.75877	4.79358e-79	5m		Gm44787	2.58534	2.59013e-94	10m
					Slc2a4	1.48744	8.60121e-28	5m		Gm45083	1.36678	1.35704e-23	10m
					Slc39a4	1.0789	1.16881e-47	5m		Gm48558	1.8546	2.28827e-20	10m
					Slc39a5	1.74622	8.12911e-88	5m		Gm5182	1.40733	1.14095e-09	10m
					Slco1a4	2.21786	5.71555e-165	5m		Gm6135	4.69737	1.55788e-129	10m
					Sptb	1.13453	4.13968e-21	5m		Gm7463	1.19296	7.02761e-13	10m
					St3gal6	2.10096	2.58489e-213	5m		Gngt2	1.00247	4.49962e-42	10m
					Stambpl1	1.34663	2.89213e-68	5m		Gpat3	1.25967	3.44908e-14	10m
					Sult1c2	1.3141	1.43571e-69	5m		Gpc6	1.64691	3.37211e-11	10m
					Sult2a1	9.2625	0	5m		Greb1l	2.13437	9.78175e-31	10m
					Sult2a2	9.80259	0	5m		Grid1	1.42604	5.82078e-22	10m
					Sult2a3	6.86932	2.91287e-155	5m		Gstp3	1.19902	3.72803e-41	10m
					Sult2a5	6.05688	2.8124e-173	5m		Gucy2c	1.59596	3.21241e-20	10m
					Sult2a7	1.39038	3.80489e-15	5m		Gypc	1.22587	1.87542e-41	10m
					Sult3a1	8.6764	0	5m		Gzma	1.25651	1.08054e-20	10m
					Sult3a2	6.12905	3.80715e-179	5m		Gzmb	1.30807	2.34967e-14	10m
					Sybu	2.33436	5.94448e-97	5m		H2-K2	1.3502	4.545e-27	10m
					Tcf24	3.29989	7.98818e-121	5m		Hamp	1.13793	2.54524e-11	10m
					Tcn2	1.03299	0	5m		Hamp2	5.70796	9.43449e-113	10m
					Tenm3	1.13254	3.02825e-91	5m		Hao2	6.80623	5.33938e-110	10m
					Tnfaip8l3	1.37972	5.70705e-32	5m		Hexb	1.26337	6.97261e-77	10m
					Tox	2.1087	1.16642e-224	5m		Hsd17b6	1.33624	4.88114e-14	10m
					Trim24	1.79065	9.49192e-257	5m		Id1	1.75811	5.08534e-22	10m
					Trim80	1.25259	1.79641e-35	5m		Id4	1.71638	9.63667e-22	10m
					Ugt1a1	1.28725	8.67762e-82	5m		Ifi205	1.01551	2.19541e-08	10m
					Ugt1a5	1.91534	3.76784e-73	5m		Ifi209	1.00892	8.02603e-26	10m
					Ugt1a9	1.18847	4.83645e-27	5m		Ifi213	1.05207	3.23737e-16	10m
					Unc79	1.54269	6.20769e-49	5m		Ifi27l2a	1.52719	1.558e-60	10m
					Vldlr	3.45996	1.14893e-192	5m		Ifi27l2b	1.45634	1.92527e-32	10m
					Vnn1	1.11408	8.75529e-23	5m		Ifi44	1.32962	1.34196e-21	10m
					1700028E10Rik	-1.19089	7.33079e-58	5m		Ifit3	1.36062	2.22045e-28	10m
					1810064F22Rik	-1.81044	1.18333e-73	5m		Ifit3b	1.23836	6.33671e-17	10m
					2010003K11Rik	-1.03003	9.3698e-30	5m		Igkv5-39	1.08542	0.00579433	10m
					2200002D01Rik	-1.28631	3.7761e-150	5m		Il15	1.31187	7.28369e-60	10m
					2810408I11Rik	-1.87564	2.07838e-105	5m		Il7	1.54257	1.96334e-17	10m
					2900009J06Rik	-1.84689	1.5721e-48	5m		Itga6	1.09202	1.03452e-15	10m
					3110082I17Rik	-1.42714	9.34146e-47	5m		Jazf1	1.37495	3.17719e-10	10m
					4930480G23Rik	-1.03333	3.16041e-42	5m		Klrd1	1.33637	8.84746e-12	10m
					4930594M22Rik	-1.00912	2.79746e-23	5m		Lepr	2.62781	9.88864e-55	10m
					9130409I23Rik	-2.03405	1.0934e-81	5m		Lmod3	2.03619	3.38632e-18	10m
					9430037G07Rik	-1.41941	2.10344e-37	5m		Loxl4	1.22149	4.61968e-08	10m
					Aatk	-1.34066	6.41217e-71	5m		Lrrc24	2.21082	3.86944e-29	10m
					Abcb1b	-1.35459	2.20041e-57	5m		Ltb	1.00379	2.35826e-14	10m
					Abcg2	-1.62808	0	5m		Ly6a	1.01881	2.49748e-23	10m
					AC079680.1	-2.03821	2.33363e-138	5m		Lyz2	1.20398	6.06166e-23	10m
					AC154577.1	-1.45566	4.99668e-38	5m		Med12l	1.01236	4.56627e-11	10m
					Acsm2	-1.23553	6.15263e-23	5m		Mfsd4a	1.26686	3.68404e-11	10m
					Acta1	-1.48301	0.000128509	5m		Mgp	1.26242	9.34242e-20	10m
					Adgrv1	-1.95605	1.04806e-134	5m		Mgst3	1.34208	1.9314e-53	10m
					Adh6-ps1	-1.7115	1.53764e-84	5m		Mmd2	1.15604	1.93705e-16	10m
					Agap2	-1.22278	3.36937e-30	5m		Mmp12	1.67047	7.91986e-09	10m
					Aox3	-1.36028	2.53543e-130	5m		Mmp27	1.07806	2.22849e-12	10m
					Aqp4	-1.65307	2.78121e-30	5m		Ms4a4b	1.39762	1.0013e-29	10m
					Arsa	-1.30364	2.06541e-263	5m		Ms4a4c	1.05439	3.79094e-09	10m
					Arsg	-1.05709	4.80551e-57	5m		Ms4a6b	1.2703	2.90323e-27	10m
					Asic5	-1.16178	1.09933e-53	5m		Ms4a6c	1.01625	8.92649e-19	10m
					Asns	-4.12799	6.50884e-211	5m		Ms4a7	1.31806	2.02254e-17	10m
					Atg16l2	-1.49252	3.01874e-94	5m		Msmp	1.70241	1.50209e-25	10m
					Atp11a	-1.47926	1.60172e-58	5m		Mt1	2.16548	1.24601e-10	10m
					Atp2a1	-1.36493	7.7585e-05	5m		Mt2	1.91753	3.57088e-07	10m
					Atp4a	-1.82644	1.20595e-45	5m		Mtmr11	1.10812	1.29223e-13	10m
					Atp8b4	-2.14045	6.28799e-92	5m		Mup-ps16	1.27809	1.94139e-12	10m
					B3galt1	-1.08908	6.80915e-23	5m		Ncmap	1.00544	6.46607e-14	10m
					B4galnt3	-1.3538	2.90226e-41	5m		Nebl	1.09806	1.60368e-07	10m
					BC021767	-2.2411	3.12479e-52	5m		Nipal1	2.42981	2.72277e-18	10m
					BC049987	-2.94517	2.20917e-206	5m		Npnt	1.06332	2.91773e-06	10m
					Bcl2l14	-1.2922	1.8072e-28	5m		Nqo1	1.10451	4.60889e-23	10m
					Bcl6	-1.20946	7.84716e-15	5m		Nrp2	1.01652	2.09114e-34	10m
					Bdnf	-1.19008	1.3022e-39	5m		Nt5e	3.38972	3.8472e-156	10m
					Bmp7	-1.10646	4.97123e-41	5m		Ntrk2	1.60219	4.90447e-18	10m
					Bmyc	-1.31391	3.09518e-54	5m		Nupr1	1.21887	4.81099e-17	10m
					Bok	-1.224	3.15013e-70	5m		Oas1a	1.36986	1.17558e-34	10m
					C4a	-2.4494	7.91926e-163	5m		Oas1g	1.78048	1.55363e-33	10m
					C6	-3.7833	0	5m		Orm3	1.03758	5.90287e-07	10m
					C730027H18Rik	-1.97796	7.67357e-120	5m		Papss2	1.10677	4.41764e-61	10m
					C8a	-2.35629	1.28803e-124	5m		Pcp4l1	2.26431	5.15671e-77	10m
					C8b	-1.96297	6.89052e-159	5m		Pdk4	1.25213	9.26891e-09	10m
					C9	-1.7422	1.12336e-209	5m		Phf11b	1.04974	1.57587e-16	10m
					Cabyr	-1.25153	1.87016e-31	5m		Pla2g16	1.49299	2.45017e-55	10m
					Capn8	-5.00385	2.72528e-154	5m		Plac8	1.09712	9.70275e-57	10m
					Carmil1	-1.37353	1.03736e-77	5m		Plek2	1.60709	2.50535e-18	10m
					Ccdc149	-1.144	6.88576e-29	5m		Plekhd1	4.0303	1.56369e-34	10m
					Ccdc30	-1.20612	1.02077e-56	5m		Plppr1	3.58742	2.18253e-33	10m
					Cd4	-1.5384	3.71603e-49	5m		Plxna4os1	1.03354	1.19264e-08	10m
					Cdc42ep5	-1.55793	4.49601e-67	5m		Pnpla3	2.83905	5.32578e-31	10m
					Ces2b	-3.55471	2.62344e-57	5m		Pnpla5	1.79217	5.36679e-06	10m
					Ces2c	-2.09453	6.4673e-91	5m		Ppp1r3g	1.42609	5.27605e-06	10m
					Ces3a	-1.19002	6.01383e-103	5m		Ppp1r42	3.18267	1.62091e-27	10m
					Ces4a	-1.91975	1.21081e-38	5m		Prelid2	1.41716	3.10498e-20	10m
					Cfd	-1.7165	9.18917e-09	5m		Prlr	1.97621	8.98956e-91	10m
					Cgref1	-1.43409	3.78503e-33	5m		Prom1	2.18236	2.04465e-52	10m
					Chrm3	-3.15772	5.30463e-103	5m		Ptpn18	1.01304	2.10069e-36	10m
					Cib3	-3.29222	2.46475e-126	5m		Ptprcap	1.10599	1.42284e-16	10m
					Cidec	-1.52669	3.72021e-28	5m		Pygo1	2.79202	2.65162e-60	10m
					Ckm	-1.68396	5.49636e-06	5m		Qpct	1.11233	3.08176e-79	10m
					Clec2h	-2.86565	7.64269e-83	5m		Rad51b	2.8838	2.93481e-22	10m
					Clic5	-1.56351	3.99474e-46	5m		Rbp1	1.17794	1.94332e-30	10m
					Clstn3	-2.11514	9.62528e-72	5m		Rcan2	1.51083	2.69033e-29	10m
					Cntnap1	-1.21748	2.0144e-14	5m		Rdh16f2	1.86014	1.68871e-170	10m
					Col27a1	-1.56858	7.8761e-102	5m		Rgs1	1.17453	4.55941e-11	10m
					Col5a3	-2.20052	6.21541e-165	5m		Rgs16	1.74805	2.31511e-09	10m
					Cpne8	-1.09093	1.24758e-40	5m		Rims4	3.46816	3.21402e-49	10m
					Crygn	-1.44122	6.60937e-83	5m		Rpl32l	1.17123	9.48067e-17	10m
					Cspg5	-2.89468	4.45908e-68	5m		Rps18-ps1	1.04077	4.11798e-09	10m
					Cxcl1	-1.45148	4.98413e-18	5m		Rsph4a	3.43251	7.44818e-40	10m
					Cyb561	-1.34654	2.90272e-51	5m		Sall1	1.22465	2.09632e-56	10m
					Cyp21a1	-3.44411	5.54242e-91	5m		Serpina6	1.18767	4.30806e-31	10m
					Cyp21a2-ps	-1.16798	5.59307e-24	5m		Serpinb1a	2.0655	2.24588e-30	10m
					Cyp2c67	-1.08611	1.34026e-88	5m		Setbp1	2.14738	2.50588e-56	10m
					Cyp2d41-ps	-1.4964	7.04867e-65	5m		Sh2d4a	1.38579	2.37329e-52	10m
					Cyp2d9	-5.22975	0	5m		Slc16a5	1.76705	7.93114e-16	10m
					Cyp2u1	-2.92475	0	5m		Slc22a26	6.99836	1.7969e-171	10m
					Cyp4a12a	-7.95616	0	5m		Slc22a27	5.19945	1.28887e-106	10m
					Cyp4a12b	-7.44274	0	5m		Slc22a29	2.96453	2.71143e-52	10m
					Cyp7b1	-3.71597	7.48235e-303	5m		Slc2a4	1.76434	2.2293e-08	10m
					Derl3	-2.09656	4.31674e-29	5m		Slc39a4	1.52548	4.52983e-19	10m
					Dhrs9	-1.01016	5.3732e-15	5m		Slc39a5	1.47618	2.39326e-16	10m
					Dkk4	-3.48049	2.26608e-72	5m		Slc51b	1.58085	6.43967e-14	10m
					Dmbt1	-2.15076	2.07278e-15	5m		Slco1a4	2.15418	9.25848e-61	10m
					Dpy19l1	-1.15208	0	5m		Slfn2	1.14436	3.18958e-36	10m
					Dpy19l3	-2.31975	2.0934e-243	5m		Smim6	1.22484	4.24107e-14	10m
					E030018B13Rik	-2.92608	1.35645e-74	5m		Snhg1	1.24166	5.50108e-95	10m
					E330011O21Rik	-1.12269	2.67367e-43	5m		Snhg6	1.05999	7.35994e-56	10m
					Egfr	-1.32547	3.08967e-43	5m		Sorl1	1.3638	7.43688e-28	10m
					Elovl3	-7.02548	0	5m		Sptb	1.21492	1.53555e-13	10m
					Esco2	-1.10717	2.14928e-15	5m		Srrm4os	1.04601	5.11918e-14	10m
					Etfbkmt	-1.43504	2.38228e-115	5m		St3gal6	2.50641	1.02505e-181	10m
					F2r	-1.04396	6.53885e-56	5m		Stambpl1	1.53393	2.12592e-28	10m
					Fam131c	-1.33956	6.1068e-42	5m		Sult1c2	1.2147	2.15316e-21	10m
					Fam19a5	-1.03617	2.82063e-21	5m		Sult1d1	1.03038	6.19598e-28	10m
					Fam222a	-1.22188	2.98068e-19	5m		Sult1e1	1.20525	0.000105211	10m
					Fam81a	-1.1205	2.11951e-24	5m		Sult2a-ps1	4.73376	6.39751e-45	10m
					Fam83f	-1.61976	9.18943e-36	5m		Sult2a1	11.9329	0	10m
					Fbf1	-1.13715	4.54415e-30	5m		Sult2a2	12.0948	0	10m
					Fitm1	-2.33693	1.81152e-104	5m		Sult2a3	9.91892	1.84394e-186	10m
					Fkbp11	-1.55402	5.35048e-126	5m		Sult2a5	8.97792	3.38404e-175	10m
					Fmn2	-2.72248	8.74764e-61	5m		Sult2a6	4.94082	3.54732e-51	10m
					Fyb2	-1.13014	4.5257e-85	5m		Sult2a7	3.02226	4.10636e-30	10m
					Gabrb3	-1.03233	1.79882e-26	5m		Sult3a1	9.01092	1.25349e-160	10m
					Gale	-1.09783	7.98517e-65	5m		Sult3a2	7.03248	3.51144e-78	10m
					Gjc3	-1.04554	2.14339e-42	5m		Sun3	1.11763	7.84608e-11	10m
					Gldn	-1.27988	8.09765e-13	5m		Sybu	3.47309	7.9136e-81	10m
					Gm10222	-1.05193	2.56002e-22	5m		Tcf24	3.81352	1.80422e-53	10m
					Gm11963	-1.17625	1.23202e-30	5m		Tgtp1	1.05728	3.81029e-09	10m
					Gm12718	-3.79075	4.43223e-179	5m		Tmsb10	1.23846	9.1688e-41	10m
					Gm14327	-1.45445	2.48641e-50	5m		Tnfaip8l3	1.18238	1.55952e-08	10m
					Gm15611	-1.95804	1.77957e-41	5m		Tox	1.90482	3.24882e-48	10m
					Gm15638	-1.17518	1.68689e-76	5m		Trbc1	1.1169	4.32473e-10	10m
					Gm18635	-1.50415	6.93971e-51	5m		Trbc2	1.21604	1.02268e-17	10m
					Gm19572	-1.66585	7.80649e-74	5m		Trim24	1.60249	6.85213e-86	10m
					Gm21320	-1.51883	2.84988e-28	5m		Trim80	1.18878	1.92854e-10	10m
					Gm28439	-1.21265	1.78518e-37	5m		Ugt1a5	1.95766	1.82677e-32	10m
					Gm30692	-1.14	1.69482e-18	5m		Unc79	1.33503	2.89766e-11	10m
					Gm30931	-1.40512	3.53363e-50	5m		Upp2	1.00844	3.37572e-06	10m
					Gm31121	-3.71041	1.0307e-76	5m		Vldlr	3.49756	6.05453e-67	10m
					Gm31583	-2.35363	5.59109e-54	5m		Wfdc15b	1.33491	1.01629e-10	10m
					Gm31814	-1.14984	1.5614e-31	5m		Wfdc17	1.11119	4.02733e-21	10m
					Gm32468	-2.07073	1.94988e-27	5m		Wsb1	1.13802	9.6562e-29	10m
					Gm34654	-1.46966	2.139e-15	5m		Zfp13	1.43419	2.81838e-30	10m
					Gm35696	-3.32676	5.42855e-134	5m		Zfp429	1.33337	2.55909e-34	10m
					Gm37988	-1.0161	0.00346429	5m		Zfp456	1.157	8.0312e-26	10m
					Gm38070	-2.03552	8.26155e-40	5m		1700028E10Rik	-1.02753	5.35651e-19	10m
					Gm3839	-3.20188	5.44841e-151	5m		2810408I11Rik	-2.07638	4.04903e-49	10m
					Gm38416	-1.56707	2.99435e-30	5m		4930480G23Rik	-1.1823	6.62468e-21	10m
					Gm40040	-1.00847	1.88704e-36	5m		9430037G07Rik	-1.10203	2.51194e-13	10m
					Gm40787	-2.83604	9.21221e-120	5m		Aatk	-2.10504	7.69536e-81	10m
					Gm43305	-1.86055	2.81151e-22	5m		Abcg2	-1.97722	2.15542e-259	10m
					Gm45792	-3.95409	2.00718e-120	5m		AC079680.1	-2.00608	8.41605e-63	10m
					Gm47465	-1.15386	9.68582e-26	5m		Adgrf1	-1.05563	0.000148103	10m
					Gm48199	-1.6961	3.18909e-21	5m		Adgrv1	-1.51602	2.37701e-40	10m
					Gm4956	-5.31223	0	5m		Adh4	-1.35592	2.65819e-67	10m
					Gnai1	-1.00379	8.86295e-25	5m		Adh6-ps1	-1.34039	2.08619e-29	10m
					Gnat2	-1.15397	6.13114e-38	5m		Aifm3	-1.08443	4.30424e-31	10m
					Gpc1	-1.91246	1.99453e-57	5m		Aldh1a1	-1.44397	6.1115e-71	10m
					Grm8	-3.61816	2.55692e-133	5m		Aox1	-1.01838	4.86745e-33	10m
					Gsta1	-1.79681	9.25922e-24	5m		Aox3	-1.82417	3.19511e-68	10m
					Gstp-ps	-3.3556	0	5m		Aqp4	-1.30954	2.70517e-18	10m
					Gstp1	-3.25797	0	5m		Arsa	-1.58528	2.13123e-108	10m
					Gstp2	-2.00252	6.62307e-99	5m		Asns	-2.54495	3.08896e-29	10m
					Gtpbp4-ps1	-3.66157	9.29673e-75	5m		Atg16l2	-1.33814	2.24693e-48	10m
					Gulp1	-1.05955	7.99952e-13	5m		Atp11a	-1.23886	6.63316e-22	10m
					Gvin1	-1.20311	2.1239e-40	5m		Atp8b4	-1.7701	6.35746e-35	10m
					Hcrtr2	-3.07544	2.76035e-76	5m		B4galnt3	-1.40509	1.09901e-19	10m
					Hsd3b5	-4.8579	3.06614e-124	5m		BC049987	-2.72631	7.07051e-54	10m
					Hspa1a	-1.87212	1.1626e-49	5m		Bcl6	-1.61149	1.39063e-11	10m
					Hspa1b	-1.22215	4.06153e-27	5m		Bdnf	-1.80218	1.64466e-26	10m
					Insc	-1.4629	6.52208e-124	5m		Bmp7	-1.15279	5.20605e-12	10m
					Kcnk1	-1.3512	3.09413e-22	5m		Bmyc	-1.22872	5.35355e-41	10m
					Kcnt2	-1.21952	1.67602e-33	5m		C2cd4d	-1.10401	1.60367e-07	10m
					Keg1	-1.56313	2.07909e-85	5m		C4a	-1.14059	2.51091e-12	10m
					Lad1	-1.68933	1.2487e-95	5m		C6	-3.62446	1.1523e-177	10m
					Lag3	-1.07944	1.75739e-31	5m		C730002L08Rik	-1.37524	4.58558e-15	10m
					Lama3	-3.08164	0	5m		C730027H18Rik	-2.00108	1.43684e-73	10m
					Lcn2	-1.51563	1.69532e-13	5m		C8a	-2.96562	2.03429e-134	10m
					Lrp2	-3.39407	1.94419e-104	5m		C8b	-2.40427	1.4237e-98	10m
					Marveld3	-1.34326	3.20274e-43	5m		C9	-1.6258	1.74286e-114	10m
					Mb	-2.12848	9.00541e-10	5m		Cabyr	-1.43788	3.0437e-15	10m
					Mcm10	-1.56168	3.70987e-161	5m		Cadm4	-1.40013	9.39964e-32	10m
					Mirt2	-1.04879	1.40983e-30	5m		Camk2b	-1.12383	8.03403e-18	10m
					Moxd1	-8.39994	1.14494e-135	5m		Capn8	-6.40183	2.32954e-94	10m
					mt-Te	-1.18268	8.52481e-20	5m		Car3	-1.0443	6.39796e-13	10m
					Mthfd2	-1.20351	1.26112e-65	5m		Carmil1	-2.1604	1.80045e-54	10m
					Mtnr1a	-3.57302	4.65177e-194	5m		Ccdc149	-1.34736	6.5675e-12	10m
					Mup-ps19	-4.0145	6.58096e-134	5m		Ccdc30	-1.25379	9.31109e-43	10m
					Mup-ps20	-6.97641	1.14932e-250	5m		Ccnf	-1.15057	1.10987e-25	10m
					Mup-ps22	-3.09746	3.55276e-104	5m		Cd4	-1.10405	5.07651e-11	10m
					Mup-ps7	-2.7465	9.49109e-94	5m		Cdc42ep5	-1.05632	9.24181e-16	10m
					Mup1	-7.38408	0	5m		Cebpe	-1.1194	2.88018e-21	10m
					Mup10	-2.00887	2.97338e-47	5m		Ces2c	-2.13905	6.80582e-62	10m
					Mup11	-6.94689	4.73087e-283	5m		Ces3a	-2.13831	6.64959e-142	10m
					Mup12	-6.77921	0	5m		Ces3b	-1.11673	5.66229e-15	10m
					Mup13	-2.2036	6.52736e-57	5m		Ces4a	-2.42222	6.08492e-16	10m
					Mup14	-7.98536	0	5m		Cfd	-3.12031	1.05696e-10	10m
					Mup15	-2.43529	3.17054e-30	5m		Cgref1	-1.05986	1.98754e-10	10m
					Mup16	-3.17676	4.29552e-65	5m		Chpt1	-1.12936	2.2135e-52	10m
					Mup17	-1.98973	6.2414e-25	5m		Chrm3	-2.8579	8.33741e-60	10m
					Mup19	-3.30985	4.91484e-118	5m		Chrna2	-1.31052	3.28825e-15	10m
					Mup2	-1.36686	2.5696e-35	5m		Cib3	-1.11873	6.29215e-05	10m
					Mup20	-7.07053	0	5m		Cidea	-3.83629	9.35367e-16	10m
					Mup21	-4.94791	0	5m		Cidec	-2.70876	2.60933e-25	10m
					Mup3	-1.69429	3.84482e-128	5m		Clec2h	-2.58228	2.26969e-34	10m
					Mup6	-2.13512	1.95387e-82	5m		Clic5	-1.89613	3.24154e-26	10m
					Mup7	-8.64914	0	5m		Clstn3	-2.44524	1.87724e-84	10m
					Mup8	-5.01841	4.86078e-193	5m		Col27a1	-1.45178	3.41425e-31	10m
					Mup9	-5.15747	7.53724e-231	5m		Col5a3	-1.81136	2.3009e-52	10m
					Myh10	-1.13265	6.3241e-75	5m		Crygn	-1.32037	3.94148e-16	10m
					Myh4	-2.14776	3.09705e-09	5m		Cspg5	-3.78316	4.06855e-34	10m
					Myl1	-1.97439	1.65366e-12	5m		Cyb561	-1.56927	5.5865e-19	10m
					Mylpf	-1.21626	3.55784e-09	5m		Cyp2c50	-1.21389	3.81917e-26	10m
					n-R5-8s1	-1.21273	2.58121e-10	5m		Cyp2c54	-2.39048	1.31954e-49	10m
					Nat8	-5.43082	0	5m		Cyp2c67	-1.30994	2.51559e-60	10m
					Nat8f5	-5.71659	5.35079e-294	5m		Cyp2d12	-1.10125	1.4399e-06	10m
					Ncam2	-2.40279	5.45736e-114	5m		Cyp2d41-ps	-1.54477	8.88592e-24	10m
					Nek2	-1.2644	5.88951e-26	5m		Cyp2d9	-6.22164	0	10m
					Nox4	-2.18952	9.3889e-172	5m		Cyp2f2	-1.5358	2.48376e-59	10m
					Nudt7	-2.35938	0	5m		Cyp2u1	-3.2505	2.65134e-224	10m
					Obp2a	-4.03356	8.76582e-107	5m		Cyp4a12a	-9.39125	5.76489e-305	10m
					Ociad2	-1.52454	7.44845e-150	5m		Cyp4a12b	-8.50559	1.0829e-173	10m
					Olfm3	-1.07265	2.35752e-24	5m		Cyp4v3	-1.09515	1.21742e-61	10m
					Olig1	-1.80976	5.05926e-69	5m		Cyp7b1	-3.79508	2.87039e-120	10m
					Omd	-3.6156	2.15315e-188	5m		D030055H07Rik	-1.37935	7.94613e-11	10m
					Orm2	-1.25703	5.32252e-13	5m		Derl3	-2.47052	6.03405e-14	10m
					Osbpl3	-1.76642	1.56935e-72	5m		Dkk4	-5.12453	8.86434e-37	10m
					Pard3b	-1.13279	1.14661e-80	5m		Dnase1	-1.93209	1.23412e-18	10m
					Peg10	-1.80937	5.93453e-49	5m		Dpy19l1	-1.50752	3.21221e-266	10m
					Phospho1	-1.29144	5.36699e-20	5m		Dpy19l3	-2.63209	1.75726e-127	10m
					Pitx3	-3.55977	4.29735e-80	5m		E030018B13Rik	-3.704	1.20071e-27	10m
					Ppp1r9a	-1.47547	1.46387e-91	5m		Egfr	-1.66758	9.51381e-37	10m
					Proca1	-1.2696	5.64568e-70	5m		Elovl3	-7.25336	2.24423e-268	10m
					Prss8	-1.00966	2.92126e-38	5m		Enpp3	-1.12796	8.52607e-124	10m
					Prtn3	-2.16649	5.79375e-27	5m		Ephb2	-1.16485	2.68561e-05	10m
					Pvalb	-1.84956	4.05589e-10	5m		Ero1lb	-1.11231	1.2544e-42	10m
					Pvt1	-1.14017	4.99361e-44	5m		F2r	-1.24931	3.87601e-64	10m
					Rarres1	-1.39118	8.6958e-80	5m		Fam131c	-1.23627	4.41919e-19	10m
					Saa1	-3.59828	1.69866e-61	5m		Fam19a5	-1.87034	1.53552e-29	10m
					Saa2	-4.11295	2.63072e-65	5m		Fam81a	-1.2129	5.00999e-14	10m
					Scara5	-6.71874	0	5m		Fam83f	-1.2122	4.27973e-09	10m
					Sdf2l1	-1.07776	1.12352e-35	5m		Fbxo40	-2.04518	8.75902e-23	10m
					Sdr9c7	-1.17196	7.73655e-88	5m		Fitm1	-2.52601	1.37783e-48	10m
					Sebox	-1.27175	2.79295e-24	5m		Gabrb3	-1.21654	2.0729e-17	10m
					Selenbp2	-4.74251	1.46491e-158	5m		Gm12718	-3.27645	8.02254e-96	10m
					Sema5b	-1.00718	1.54626e-19	5m		Gm15441	-1.04351	0.003904	10m
					Serpina12	-2.00356	3.16796e-57	5m		Gm15611	-2.6567	1.14106e-19	10m
					Serpina1e	-4.57256	2.10682e-193	5m		Gm15638	-1.19403	4.08207e-20	10m
					Serpina3c	-1.70575	3.0268e-32	5m		Gm18337	-1.06892	7.14372e-15	10m
					Serpina3k	-1.12061	9.66602e-41	5m		Gm18635	-1.64774	2.22045e-28	10m
					Serpina4-ps1	-3.16601	4.37383e-66	5m		Gm21320	-1.49244	3.09597e-10	10m
					Serpina9	-1.3634	4.54257e-17	5m		Gm26684	-1.17873	2.06004e-15	10m
					Serpine2	-2.15651	8.35115e-134	5m		Gm26967	-1.85218	2.06588e-40	10m
					Slc10a2	-1.49552	2.44202e-46	5m		Gm30931	-2.13743	4.06174e-44	10m
					Slc15a5	-2.89656	1.66502e-165	5m		Gm31121	-6.46621	6.27202e-73	10m
					Slc22a28	-4.18677	1.31245e-216	5m		Gm31583	-2.72418	9.85807e-86	10m
					Slc35f2	-2.80177	1.68621e-90	5m		Gm31717	-1.32045	1.40948e-13	10m
					Slc37a1	-1.23785	1.9007e-28	5m		Gm32468	-1.30476	2.47899e-07	10m
					Slc41a2	-2.41018	1.86451e-82	5m		Gm35696	-3.10277	3.6084e-19	10m
					Slco1a1	-3.3775	1.76179e-84	5m		Gm3839	-2.67429	5.03938e-35	10m
					Smpd3	-1.99884	1.47653e-44	5m		Gm38416	-1.96998	2.0467e-22	10m
					Snhg11	-2.56603	3.60686e-110	5m		Gm40787	-2.71698	2.8551e-44	10m
					Spata24	-1.14285	4.5489e-51	5m		Gm40923	-5.16163	2.16779e-54	10m
					Spsb4	-1.64259	2.92907e-76	5m		Gm45792	-4.67573	5.85265e-39	10m
					Srd5a1	-1.38662	5.60961e-107	5m		Gm45941	-1.04796	1.29554e-05	10m
					Sstr2	-2.34439	1.61719e-74	5m		Gm47465	-1.70252	1.3641e-19	10m
					Susd4	-3.76729	3.5342e-156	5m		Gm4956	-4.22435	7.28574e-225	10m
					Syt12	-1.83165	8.69055e-59	5m		Gna14	-1.20084	4.45903e-27	10m
					Tcap	-1.3768	6.27495e-07	5m		Gnai1	-1.38205	3.00413e-24	10m
					Tchh	-1.4841	2.07195e-36	5m		Gpc1	-2.306	4.6198e-58	10m
					Tff3	-6.55763	2.92967e-267	5m		Grm8	-4.17204	4.08064e-77	10m
					Themis	-1.48088	1.4921e-19	5m		Gsta1	-1.41601	3.67805e-08	10m
					Tmc5	-3.37349	4.87309e-61	5m		Gstp-ps	-2.62635	1.04672e-92	10m
					Tmeff2	-2.65577	7.86455e-64	5m		Gstp1	-2.63188	1.56785e-124	10m
					Tmem71	-1.12747	1.5297e-46	5m		Gstp2	-1.40892	7.74233e-16	10m
					Tnnc2	-1.83186	6.56642e-09	5m		Gtpbp4-ps1	-4.49526	5.72513e-35	10m
					Tnni2	-1.33789	3.82517e-05	5m		Gulp1	-1.00226	2.03733e-06	10m
					Tnnt3	-1.72493	3.16112e-06	5m		Hcrtr2	-4.22558	2.62475e-38	10m
					Tpmt	-1.36576	9.49613e-250	5m		Hsd3b2	-1.61704	2.07576e-63	10m
					Treh	-2.38469	1.18716e-117	5m		Hsd3b5	-9.34593	8.90086e-217	10m
					Trhde	-1.75623	3.61546e-71	5m		Hyou1	-1.02833	3.63436e-28	10m
					Tsc22d1	-1.2889	2.30735e-38	5m		Irx1	-1.08768	9.67587e-10	10m
					Ttc39c	-2.02449	0	5m		Kbtbd12	-1.05451	4.4562e-09	10m
					Ttyh1	-1.09187	4.0041e-22	5m		Kcnt2	-1.14203	7.75784e-12	10m
					Ubd	-1.36328	2.48095e-22	5m		Kcp	-1.0956	8.71721e-12	10m
					Ugt2b1	-1.74747	6.06204e-232	5m		Kctd17	-1.01172	7.17733e-20	10m
					Ugt2b38	-5.8293	4.00821e-275	5m		Keg1	-1.85726	7.40446e-49	10m
					Unc13b	-1.16296	3.37933e-80	5m		Klhdc7a	-1.03822	2.61007e-17	10m
					Zbtb7c	-1.93149	1.15751e-36	5m		Lad1	-2.68465	1.04844e-51	10m
					Zfp125	-1.03555	1.9172e-69	5m		Lama3	-2.83835	8.01389e-76	10m
					Zfp810	-1.01592	6.67515e-58	5m		Lamb3	-1.01606	1.21513e-11	10m
					Zfp979	-2.39635	2.73755e-57	5m		Lrp2	-3.44034	2.72415e-46	10m
					Zfp982	-1.58575	1.86571e-65	5m		Mapk15	-1.12982	3.35702e-15	10m
					Zfp992	-2.16541	5.61379e-65	5m		Mcm10	-1.56262	5.76861e-61	10m
										Mogat1	-1.07213	8.73908e-07	10m
										Moxd1	-7.78435	1.7522e-53	10m
										Mtnr1a	-3.32708	1.66558e-142	10m
										Mug1	-1.74225	1.63514e-85	10m
										Mup-ps19	-4.21193	4.97428e-97	10m
										Mup-ps20	-6.68048	2.86387e-67	10m
										Mup-ps7	-3.92319	2.73569e-61	10m
										Mup1	-8.84426	2.40046e-209	10m
										Mup11	-9.21249	4.99073e-237	10m
										Mup12	-8.03757	1.53748e-192	10m
										Mup14	-9.52938	0	10m
										Mup15	-4.22964	4.76543e-21	10m
										Mup16	-3.67066	5.90449e-40	10m
										Mup17	-5.015	3.21839e-37	10m
										Mup18	-2.61442	3.32286e-16	10m
										Mup19	-2.46436	8.53178e-29	10m
										Mup20	-5.76967	1.58028e-217	10m
										Mup21	-5.519	0	10m
										Mup3	-2.40398	1.15608e-49	10m
										Mup6	-3.71828	5.15259e-32	10m
										Mup7	-11.1805	5.89872e-305	10m
										Mup8	-4.97182	3.3984e-63	10m
										Mup9	-3.83287	5.34715e-30	10m
										Myh10	-1.35561	1.85752e-47	10m
										Nat8	-5.3672	2.04616e-164	10m
										Nat8f5	-6.84539	5.03022e-137	10m
										Ncam2	-2.85541	1.33089e-67	10m
										Nek2	-1.60149	9.61732e-21	10m
										Nox4	-2.99173	2.89792e-181	10m
										Nudt7	-1.89604	5.0726e-62	10m
										Obp2a	-6.16987	6.6502e-61	10m
										Ociad2	-1.60638	2.84524e-135	10m
										Olfm3	-1.29234	1.84009e-31	10m
										Olig1	-2.56605	2.42699e-65	10m
										Omd	-4.03147	7.21718e-142	10m
										Osbpl3	-1.27404	8.96278e-15	10m
										Pard3b	-1.30424	1.50048e-28	10m
										Pdilt	-1.19556	2.58732e-43	10m
										Peg10	-1.27989	8.07899e-09	10m
										Phospho1	-1.28367	1.61723e-07	10m
										Plcxd2	-1.08155	2.81078e-24	10m
										Pnldc1	-1.58213	4.2629e-11	10m
										Ppp1r9a	-1.88098	7.1545e-64	10m
										Proca1	-1.49499	9.62342e-45	10m
										Prok1	-1.10358	9.5115e-06	10m
										Prrx1	-1.18256	3.00634e-17	10m
										Rarres1	-1.37785	4.94902e-36	10m
										Rec114	-1.03222	0.000161022	10m
										Rpp40	-1.01443	6.50214e-16	10m
										Scara5	-6.32167	3.89609e-99	10m
										Sdr9c7	-1.35559	1.06007e-63	10m
										Selenbp2	-3.99774	6.64942e-49	10m
										Sema5b	-1.52536	4.52512e-14	10m
										Serpina12	-2.24139	4.25226e-36	10m
										Serpina1e	-5.66044	9.77182e-82	10m
										Serpina3c	-1.68187	3.15299e-13	10m
										Serpina3k	-1.33485	2.15522e-44	10m
										Serpina4-ps1	-5.04868	4.57469e-54	10m
										Serpina9	-2.91951	1.83985e-21	10m
										Serpine2	-2.2616	4.65758e-81	10m
										Slc10a2	-1.43973	2.97876e-26	10m
										Slc15a5	-3.85821	8.4029e-154	10m
										Slc17a8	-1.21539	3.15915e-29	10m
										Slc22a28	-5.95668	0	10m
										Slc22a7	-1.54796	9.85531e-23	10m
										Slc26a4	-1.22618	2.87666e-11	10m
										Slc35e3	-1.24546	1.8377e-60	10m
										Slc35f2	-3.6614	1.29716e-34	10m
										Slc41a2	-1.68352	6.96078e-15	10m
										Slc6a16	-1.53817	1.8326e-15	10m
										Slco1a1	-7.68865	2.51435e-153	10m
										Smpd3	-1.03654	4.8222e-08	10m
										Snhg11	-2.46581	1.90321e-40	10m
										Sort1	-1.00288	3.28088e-19	10m
										Sox9	-1.01859	8.67661e-17	10m
										Spink5	-1.16431	7.30397e-12	10m
										Spsb4	-1.32552	6.97566e-23	10m
										Srd5a1	-1.57071	5.65215e-71	10m
										Sstr2	-2.63474	1.26482e-30	10m
										Susd4	-6.29853	5.20817e-215	10m
										Tchh	-1.66283	3.10812e-13	10m
										Tff3	-3.60003	4.00823e-25	10m
										Themis	-1.82924	8.11336e-10	10m
										Tmem19	-1.18943	1.58209e-59	10m
										Tpmt	-1.07917	1.4436e-46	10m
										Treh	-2.97455	1.17558e-34	10m
										Trhde	-2.31101	2.73159e-49	10m
										Tsc22d1	-1.33788	2.29741e-20	10m
										Ttbk1	-1.42355	6.75664e-14	10m
										Ttc39c	-2.20534	1.33593e-135	10m
										Ttyh1	-1.26443	4.54676e-08	10m
										Ugt2b1	-1.5107	1.55621e-115	10m
										Ugt2b38	-5.8014	1.26736e-84	10m
										Unc13b	-1.14986	8.03403e-18	10m
										Zbtb7c	-1.48511	1.79759e-12	10m
										Zfhx2	-1.12411	9.71255e-19	10m
										Zfp979	-3.95376	1.65234e-88	10m
										Zfp982	-2.06855	5.52782e-42	10m
										Zfp992	-4.04279	2.3108e-99	10m
										Znf41-ps	-1.22497	6.1788e-17	10m
