# Supplementary material for: Toxicogenomic Insights into Environmental Toxicant Exposures: The TaRGET II Resource
Source: Research Square preprint supplement (doi:10.21203/rs.3.rs-7285514/v1), 2025-08-20
Supplement: Supplementary file 8 [file 9080bd453b3eec7cad045285.xlsx]

## Sheet: DEG
		3 weeks blood		20 weeks blood
		Female	Male	Female	Male
Shared DEGs	Multiple	1050	1063	2164	1984
Exposure specific DEGs	TCDD	85	50	49	23
	BPA10mg	415	1010	1410	297
	BPA10ug	1298	800	125	81
	PM2.5-JHU	87	128	903	1310
	DEHP	5	25	3	20
	Pb	17	35	13	54
	PM2.5-CHI	184	219	26	403
	TBT			596	651
	As	214	193	102	378

## Sheet: DAR
		20 weeks blood
		Female	Male
Shared DARs	Multiple	4344	1936
Exposure specific DARs	TCDD	813	135
	BPA10mg	1516	1027
	BPA10ug	1873	1290
	PM2.5-JHU	482	4787
	DEHP	80	29
	Pb	52	70
	PM2.5-CHI	9046	362
	TBT	2236	582

## Sheet: DMR
		20 weeks blood
		Female	Male
Shared DARs	Multiple	1869	1145
Exposure specific DARs	TCDD	242	180
	BPA10mg	49080	5179
	BPA10ug	1018	2170
	PM2.5-JHU	627	695
	DEHP	205	140
	Pb	142	106
	TBT	1271	493
	As	73	104
