# Supplementary material for: Toxicogenomic Insights into Environmental Toxicant Exposures: The TaRGET II Resource
Source: Research Square preprint supplement (doi:10.21203/rs.3.rs-7285514/v1), 2025-08-20
Supplement: Supplementary file 9 [file a7615d17cb7eaeb66cefe154.xlsx]

## Sheet: PM2.5-CHI
Exposure	ChromHMM_state_in_control	ChromHMM_state_in_Exposure	Number_of_DAR_w_altered_State
PM2.5-CHI	AP	Enhancer1	2
PM2.5-CHI	AP	Enhancer2	1
PM2.5-CHI	AP	Promoter	5
PM2.5-CHI	Enhancer1	AP	60
PM2.5-CHI	Enhancer1	Enhancer2	20
PM2.5-CHI	Enhancer1	OCR	62
PM2.5-CHI	Enhancer1	Promoter	15
PM2.5-CHI	Enhancer2	AP	1
PM2.5-CHI	Enhancer2	Enhancer1	11
PM2.5-CHI	Enhancer2	None	3
PM2.5-CHI	Enhancer2	OCR	10
PM2.5-CHI	Enhancer2	Promoter	1
PM2.5-CHI	Multi-states	AP	16
PM2.5-CHI	Multi-states	Enhancer1	38
PM2.5-CHI	Multi-states	Enhancer2	20
PM2.5-CHI	Multi-states	None	30
PM2.5-CHI	Multi-states	OCR	101
PM2.5-CHI	Multi-states	Promoter	27
PM2.5-CHI	None	AP	2
PM2.5-CHI	None	Enhancer1	8
PM2.5-CHI	None	Enhancer2	25
PM2.5-CHI	None	OCR	180
PM2.5-CHI	None	Promoter	43
PM2.5-CHI	OCR	AP	8
PM2.5-CHI	OCR	Enhancer1	47
PM2.5-CHI	OCR	Enhancer2	45
PM2.5-CHI	OCR	None	267
PM2.5-CHI	OCR	Promoter	76
PM2.5-CHI	Promoter	AP	6
PM2.5-CHI	Promoter	None	1
PM2.5-CHI	Promoter	OCR	1

## Sheet: Pb
Exposure	ChromHMM_state_in_control	ChromHMM_state_in_Exposure	Number_of_DAR_w_altered_State
Pb	Multi-states	AP	1
Pb	AP	Enhancer1	1
Pb	Enhancer2	Enhancer1	1
Pb	Multi-states	Enhancer1	6
Pb	None	Enhancer1	3
Pb	OCR	Enhancer1	9
Pb	Enhancer1	Enhancer2	1
Pb	None	Enhancer2	2
Pb	OCR	Enhancer2	2
Pb	OCR	None	4
Pb	AP	OCR	1
Pb	Enhancer1	OCR	5
Pb	Enhancer2	OCR	2
Pb	Multi-states	OCR	7
Pb	None	OCR	20
Pb	Multi-states	Promoter	2

## Sheet: DEHP
Exposure	ChromHMM_state_in_control	ChromHMM_state_in_Exposure	Number_of_DAR_w_altered_State
DEHP	OCR	Enhancer1	1
DEHP	OCR	None	1
DEHP	Enhancer1	OCR	1
DEHP	Multi-states	OCR	1
DEHP	None	OCR	4
DEHP	Multi-states	Promoter	1
DEHP	None	Promoter	1

## Sheet: PM2.5-JHU
Exposure	ChromHMM_state_in_control	ChromHMM_state_in_Exposure	Number_of_DAR_w_altered_State
PM2.5-JHU	AP	Enhancer1	3
PM2.5-JHU	AP	Promoter	3
PM2.5-JHU	Enhancer1	AP	2
PM2.5-JHU	Enhancer1	Enhancer2	17
PM2.5-JHU	Enhancer1	OCR	7
PM2.5-JHU	Enhancer2	Enhancer1	8
PM2.5-JHU	Enhancer2	None	2
PM2.5-JHU	Enhancer2	OCR	1
PM2.5-JHU	Multi-states	AP	4
PM2.5-JHU	Multi-states	Enhancer1	19
PM2.5-JHU	Multi-states	Enhancer2	50
PM2.5-JHU	Multi-states	None	57
PM2.5-JHU	Multi-states	OCR	17
PM2.5-JHU	Multi-states	Promoter	6
PM2.5-JHU	None	AP	1
PM2.5-JHU	None	Enhancer1	3
PM2.5-JHU	None	Enhancer2	25
PM2.5-JHU	None	OCR	29
PM2.5-JHU	None	Promoter	5
PM2.5-JHU	OCR	Enhancer1	28
PM2.5-JHU	OCR	Enhancer2	56
PM2.5-JHU	OCR	None	308
PM2.5-JHU	OCR	Promoter	4
PM2.5-JHU	Promoter	AP	2
PM2.5-JHU	Promoter	Enhancer2	3
PM2.5-JHU	Promoter	None	5
PM2.5-JHU	Promoter	OCR	2

## Sheet: BPA10ug
Exposure	ChromHMM_state_in_control	ChromHMM_state_in_Exposure	Number_of_DAR_w_altered_State
BPA10ug	Enhancer1	AP	101
BPA10ug	Enhancer2	AP	13
BPA10ug	Multi-states	AP	157
BPA10ug	None	AP	9
BPA10ug	OCR	AP	10
BPA10ug	Promoter	AP	49
BPA10ug	AP	Enhancer1	41
BPA10ug	Enhancer2	Enhancer1	329
BPA10ug	Multi-states	Enhancer1	817
BPA10ug	None	Enhancer1	85
BPA10ug	OCR	Enhancer1	259
BPA10ug	Promoter	Enhancer1	3
BPA10ug	AP	Enhancer2	1
BPA10ug	Enhancer1	Enhancer2	88
BPA10ug	Multi-states	Enhancer2	352
BPA10ug	None	Enhancer2	240
BPA10ug	OCR	Enhancer2	329
BPA10ug	Promoter	Enhancer2	1
BPA10ug	Enhancer2	None	9
BPA10ug	Multi-states	None	110
BPA10ug	OCR	None	127
BPA10ug	Promoter	None	10
BPA10ug	AP	OCR	4
BPA10ug	Enhancer1	OCR	244
BPA10ug	Enhancer2	OCR	107
BPA10ug	Multi-states	OCR	1267
BPA10ug	None	OCR	1570
BPA10ug	Promoter	OCR	49
BPA10ug	AP	Promoter	89
BPA10ug	Enhancer1	Promoter	8
BPA10ug	Enhancer2	Promoter	11
BPA10ug	Multi-states	Promoter	135
BPA10ug	None	Promoter	53
BPA10ug	OCR	Promoter	70

## Sheet: TCDD
Exposure	ChromHMM_state_in_control	ChromHMM_state_in_Exposure	Number_of_DAR_w_altered_State
TCDD	AP	Enhancer1	6
TCDD	AP	Promoter	4
TCDD	Enhancer1	AP	47
TCDD	Enhancer1	Enhancer2	3
TCDD	Enhancer1	None	1
TCDD	Enhancer1	OCR	34
TCDD	Enhancer1	Promoter	1
TCDD	Enhancer2	Enhancer1	18
TCDD	Enhancer2	None	1
TCDD	Enhancer2	OCR	3
TCDD	Enhancer2	Promoter	1
TCDD	Multi-states	AP	21
TCDD	Multi-states	Enhancer1	100
TCDD	Multi-states	Enhancer2	11
TCDD	Multi-states	None	4
TCDD	Multi-states	OCR	65
TCDD	Multi-states	Promoter	9
TCDD	None	AP	1
TCDD	None	Enhancer1	17
TCDD	None	Enhancer2	23
TCDD	None	OCR	209
TCDD	None	Promoter	5
TCDD	OCR	AP	3
TCDD	OCR	Enhancer1	159
TCDD	OCR	Enhancer2	46
TCDD	OCR	None	34
TCDD	OCR	Promoter	13	221
TCDD	Promoter	AP	1

## Sheet: BPA10mg
Exposure	ChromHMM_state_in_control	ChromHMM_state_in_Exposure	Number_of_DAR_w_altered_State
BPA10mg	Enhancer1	AP	7
BPA10mg	Enhancer2	AP	2
BPA10mg	Multi-states	AP	30
BPA10mg	None	AP	2
BPA10mg	OCR	AP	6
BPA10mg	Promoter	AP	41
BPA10mg	AP	Enhancer1	37
BPA10mg	Enhancer2	Enhancer1	223
BPA10mg	Multi-states	Enhancer1	808
BPA10mg	None	Enhancer1	113
BPA10mg	OCR	Enhancer1	280
BPA10mg	Promoter	Enhancer1	5
BPA10mg	AP	Enhancer2	5
BPA10mg	Enhancer1	Enhancer2	230
BPA10mg	Multi-states	Enhancer2	847
BPA10mg	None	Enhancer2	671
BPA10mg	OCR	Enhancer2	606
BPA10mg	Promoter	Enhancer2	20
BPA10mg	AP	None	1
BPA10mg	Enhancer1	None	5
BPA10mg	Enhancer2	None	25
BPA10mg	Multi-states	None	425
BPA10mg	OCR	None	415
BPA10mg	Promoter	None	18
BPA10mg	AP	OCR	1
BPA10mg	Enhancer1	OCR	123
BPA10mg	Enhancer2	OCR	19
BPA10mg	Multi-states	OCR	310
BPA10mg	None	OCR	315
BPA10mg	Promoter	OCR	11
BPA10mg	AP	Promoter	56
BPA10mg	Enhancer1	Promoter	27
BPA10mg	Enhancer2	Promoter	7
BPA10mg	Multi-states	Promoter	87
BPA10mg	None	Promoter	15
BPA10mg	OCR	Promoter	10
