# Supplementary material for: Toxicogenomic Insights into Environmental Toxicant Exposures: The TaRGET II Resource
Source: Research Square preprint supplement (doi:10.21203/rs.3.rs-7285514/v1), 2025-08-20
Supplement: Supplementary file 10 [file bd71c249eefc87629b4a874c.docx]

**Title: Comprehensive Transcriptomic and Epigenomic Insights into Environmental Toxicant Exposures: The TaRGET II Resource**

Bo A. Zhang1,2,*, Benpeng Miao3,*, Shuhua Fu1,2, Cristian Coarfa4,5, Ravindra Kumar1, Prashant Kumar Kuntala3, Bongsoo Park6, Sandra l. Grimm4,5, Rahul Jangid4,5, Justin A. Colacino7,8, Laurie K. Svoboda7,9, Wanqing Shao3, Xiaoyun Xing3, Daofeng Li3, Shaopeng Liu1,2, Robert B. Hamanaka10, Claudia Lalancette11, Maureen A. Sartor12, Christopher Krapp13, Gregory E Crawford14, Heather B. patisaul15, Tim Wiltshire16, TaRGET II Consortium, David Aylor15,$, Shyam Biswal6,$, Gökhan M. Mutlu10,$, Sanjay Rajagopalan17,$, Wan-Yee Tang18,$, Ting Wang3,$,#, Dana C. Dolinoy7,8, $,#, Marisa S. Bartolomei13,$,#, Cheryl Walker4,5,$,#

1. Department of Developmental Biology, Washington University School of Medicine, St. Louis, MO 63108, USA
2. Center of Regenerative Medicine, Washington University School of Medicine, St. Louis, MO 63108, USA
3. Department of Genetics, Washington University School of Medicine, St. Louis, MO 63108, USA
4. Dan L. Duncan Comprehensive Cancer Center, Baylor College of Medicine, Houston, TX 77030, USA
5. Center for Precision Environmental Health, Baylor College of Medicine, Houston, TX 77030, USA
6. Department of Environmental Health and Engineering, School of Public Health, Johns Hopkins University, Baltimore, MD 21205, USA
7. Department of Environmental Health Sciences, University of Michigan School of Public Health, Ann Arbor, MI 48109 USA
8. Department of Nutritional Sciences, University of Michigan School of Public Health, Ann Arbor, MI 48109 USA
9. Department of Pharmacology, University of Michigan School of Medicine, Ann Arbor, MI 48109 USA
10. Department of Medicine, Section of Pulmonary and Critical Care Medicine, The University of Chicago, Chicago, IL 60637, USA
11. Epigenomics Core, University of Michigan, Ann Arbor, MI 48109 USA
12. Department of Computational Medicine and Bioinformatics, University of Michigan, Ann Arbor, MI 48109 USA
13. Department of Cell and Developmental Biology, Perelman School of Medicine, University of Pennsylvania, Philadelphia, PA 19104, USA
14. Division of Medical Genetics, Department of Pediatrics, Duke University School of Medicine, Durham, NC 27710, USA
15. Department of Biological Sciences, North Carolina State University, Raleigh, NC 27695
16. Eshelman School of Pharmacy, University of North Carolina at Chapel Hill, Chapel Hill, NC
17. Cardiovascular Research Institute, School of Medicine, Case Western Reserve University, OH 44106, USA
18. Department of Environmental and Occupational Health, University of Pittsburgh School of Public Health, Pittsburgh, PA 15216, USA

**Supplementary material list**

1. **Supplementary file: Method**
2. **Supplementary tables**
3. **Supplementary figures**

**A: Supplementary file: Method**

Flagship_paper_method.docx

**B: Supplementary tables**

S-table 1. assay_sample_summary.xlsx

S-table 2. OMICS_assay_QC_Parameter.xlsx

S-table 3. DEG_DAR_DMR_in_liver.xlsx

S-table 4. summary_DAR_Histone_state_changed.xlsx

S-table 5. GO_Biology_Process.xlsx

S-table 6. Mouse expression patterns changed after exposure.xlsx

S-table 7. Liver_sex-biased_DEG_signatures_3_stages.xlsx

S-table 8. Liver_sex-biased_DEG_signatures_Under_exposures.xlsx

S-table 9. 5month_blood_DEGs_DARs_DMRs

S-table 10. distribution_of_DEG_DAR_DMR_in_blood.xlsx

**C: Supplementary figures**

S-Figure-1. 5month_liver_RNA_ATAC_PCA.pdf

S-Figure-2. 5month_liver_RNA_ATAC_correlation.pdf

S-Figure-3. 5month_blood_RNA_ATAC_PCA.pdf

S-Figure-4_PCA_3week5monthBlood_3week10monthLiver.pdf

S-Figure-5_PCA_5month_WGBS.pdf

S-Figure-6_Liver_DEG_Blood_DEG_DAR_DMR.pdf

S-Figure-7_Liver_DEG_DAR_unique_feature.pdf

S-Figure-8_Liver_Male_chromHMM_V2.pdf

S-Figure-9_Liver_Male_DAR_chromHMM_annotation.pdf

S-Figure-10_Liver_Gene_developmental_pattern.pdf

S-Figure-11_Sex_DAR_DMR_GSEA_heatmap.pdf

S-Figure-12_Sex_GSEA_3DPCA_SexGene.pdf

S-Figure-13_Blood_male_liver.pdf

**Supplementary figure legend**

**S-Figure 1**. **Principal component analysis (PCA) of 5-month liver samples in each toxicant exposure condition group.** **a)** The PCA plot of 5-month liver RNA-seq samples under different exposures. **b)** The PCA plot of 5-month liver ATAC-seq samples under different exposures. Female and male samples were first separated along principal component 1 (PC1) for both RNA-seq and ATAC-seq samples in each condition group, and then most exposure samples were separated from control samples along PC2. Green: control samples; Red and Blue: exposure samples. Cross: female sample. Dot: male sample. As: arsenic; Pb: lead; BPA: bisphenol A; TBT: tributyltin; DEHP: di-2-ethylhexyl phthalate; TCDD: tetrachlorodibenzo-p-dioxin; PM2.5: particulate matter < 2.5 micrometers. CHI: University of Chicago consortium; JHU: Johns Hopkins University consortium.

**S-Figure 2**. **The correlations between toxicant-exposed and control samples in different condition groups**. **a)** The heatmaps showing the correlation of 5-month liver RNA-seq samples separately for females and males under different exposures. In the panel, each row represents one exposure; the left and right columns represent females and males. For each heatmap, the rows and columns display individual samples from the respective exposed (pink) and control (green) groups. The cell colors within the heatmap indicate the Pearson correlation between two samples, with red showing high correlation. **b)** The heatmaps showing the correlation of 5-month liver ATAC-seq samples separately for females and males under different exposures. For both RNA-seq and ATAC-seq samples, the majority of exposed samples cluster together, while the control samples form distinct clusters.

**S-Figure 3**. **Principal component analysis (PCA) of 5-month blood samples in each toxicant exposure condition group.** The PCA plots show different exposures for **a)** 5-month blood RNA-seq samples and **b)** 5-month blood ATAC-seq samples. Samples from different sex and exposure groups were clustered separately. Green: control samples; Red and Blue: exposure samples. Cross: female sample. Dot: male sample.

**S-Figure 4**. **Principal component analysis (PCA) of all exposure samples from different life stages of liver and blood.** **a)** PCA plots of 3-week liver samples based on transcriptome (left) and open chromatin data (right). For both data types, most 3-week liver samples from different exposure and sex groups were mixed. **b)** PCA plot of 10-month liver samples based on transcriptome. Female and male samples were well separated, with different exposures forming separate clusters away from control samples. **c)** PCA plot of 3-week blood samples based on transcriptome. Most samples were mixed regardless of sex and exposure. **d)** PCA plots of 5-month blood samples based on transcriptome (left) and open chromatin data (right). The open chromatin PCA plot showed clearer relationships among samples from different exposure and sex groups compared to the transcriptome PCA plot. At the open chromatin level, female samples were well separated from male samples; many samples clustered distinctly by exposure and away from controls. Dot: male; Cross: female; Colors: control and exposure samples. **e)** Euclidean distance of exposed animals relative to normal controls (center of distribution) in epigenomes PCA space across two stages for female (left) and male (right). Exposures to As, BPA10mg, PM2.5-CHI, and TBT caused increased global changes in chromatin accessibility in 5-month female liver compared to 3-week female liver samples. In males, many exposures were associated with greater global changes in chromatin accessibility in 5-month liver. Blue: 3-week liver; Green: 5-month liver.

**S-Figure 5**. **PCA illustration** of **a**) all tissue methylomes and **b**) 5-month liver samples from the TaRGET II dataset, colored either by sex (left) or toxicant exposure (right). **c)** Euclidean distance (x-axis) between exposed and sex-matched controls (distribution center) in the PCA space of the liver transcriptome from all individuals at 5 months.

**S-Figure 6**. **Molecular signatures were identified in liver and blood samples responding to exposures across life stages**. **a)** Number of differentially expressed genes (DEGs) identified in exposed livers at three different life stages, shown separately for females (left) and males (right). Thousands of genes were affected only in one stage by environmental toxin exposure for both females and males, and less than 10% of DEGs were common across all three stages. Different colors indicate whether DEGs are specific to one stage or shared across multiple stages in the liver. 3W: 3 weeks; 5M: 5 months; 10M: 10 months. "Only" indicates genes specific to one life stage. **b)** Number of differentially expressed genes, differentially open chromatin regions, and differentially DNA methylated regions for various exposure conditions in female (top) and male (bottom) mouse blood at different life stages. Exposures caused dynamic changes in gene expression, chromatin accessibility, and DNA methylation in both female and male mouse blood. 3 weeks: blood samples taken at 3 weeks; 5 months: blood samples taken at 5 months. Colors represent different exposures; multi-response indicates molecular signatures responding to multiple exposures.

**S-Figure 7**. **Distribution of differentially expressed genes (DEGs) and accessible regions (DARs) identified in mouse liver across three life stages.** DEGs are shown in **a)** 3-week, **b)** 5-month, and **c)** 10-month female liver (left) and male liver (right). On average, about 20% of genes were differentially altered by environmental exposures in both females and males at different life stages, with a small number of DEGs shared by multiple exposures. DARs are shown in **d)** 3-week and **e)** 5-month female liver (left) and male liver (right). Overall, 10% and 14% of open chromatin regions (OCRs) in females and males, respectively, were significantly changed by environmental exposures at 3 weeks; 17% and 21% were identified as DARs at 5 months. Most DARs were affected by only one environmental exposure. Colors represent different exposures.

**S-Figure 8**. **Exposure-induced changes of chromatin states in the liver of 5-month-old males. a)** Chromatin states annotated in control and exposed 5-month-old male livers, including Active Promoter, Promoter, Enhancer1, Enhancer2, open chromatin regions (OCR), and non-annotated elements (None). The chromatin states of each 200bp bin were annotated using ATAC-seq, H3K27Ac, and H3K4me3 ChIP-seq data. **b)** Percentage of different chromatin states annotated in the mouse genome in control male livers. About 3% of 200bp regions were annotated as promoters, enhancers, or OCRs. **c)** Number of annotated functional regions, including Active Promoter, Promoter, Enhancer1, Enhancer2, and open chromatin regions (OCR), under different exposure conditions. The overall functional regions were relatively stable across different exposure conditions. **d)** The majority of functional regions identified in control male livers retain their chromatin states in toxicant-exposed male livers, with limited dynamic changes of chromatin states switching, with colors representing different states.

**S-Figure 9**. **The chromatin states of differentially accessible regions (DARs) in 5-month-old male liver.** **a)** Fraction of DARs annotated as different chromatin states in 5-month-old male liver. ‘Multi-states’ represent DARs with multiple chromatin state annotations in response to different exposures. More than 80% of DARs are annotated as promoters, enhancers, or open chromatin regions (OCR). AP: active promoter. **b)** The dynamic changes in chromatin states of DARs from control to exposed conditions in 5-month-old male liver. Most of these DARs did not show changes in chromatin states in response to exposures. Colors indicate different groups of annotations.

**S-Figure 10.** **Temporal gene expression patterns across three life stages in mouse liver.** **a)** The Within-Cluster Sum of Squares (WCSS) of the k-means clustering method was used to identify the number of temporal expression patterns in female (top) and male (bottom) mouse liver. A total of nine expression patterns were observed in both females and males, with the <5% decrease of WCSS. **b)** Nine distinct temporal expression patterns during mouse liver development and aging. The left panel shows the nine different expression patterns, while the middle and right panels display changes in gene expression within these patterns from 3 weeks to 5 months in female (middle) and male (right) liver. **c)** Enriched biological processes for each temporal expression pattern in male mice. Males show a similar enrichment of biological processes as females. The dot color indicates the P-value. **d)** Enriched biological processes for genes that change temporal patterns in BPA10µg-exposed female liver (left) and TBT-exposed male liver (right).

**S-Figure 11.** **The molecular features common between females and males responding to exposures.** **a)** The sex distribution of differentially accessible regions (DARs) across different exposures at the 3 weeks and 5 months stages of mouse liver. Very few DARs were shared by both females and males in the same exposure. The x-axis shows the number of DARs identified in each exposure. **b)** The sex distribution of differentially methylated regions (DMRs) across different exposures at the 5-month stage of mouse liver. Most DMRs were specific to either females or males in response to exposures. **c)** Signatures of sex-shared and sex-specific differentially expressed genes (DEGs) in mouse liver. The top panel shows the number of female-specific (left), male-specific (middle), and female-male shared (right) DEGs at three life stages. The bottom panel separately displays the enriched signatures associated with each group of DEGs in the top panel.

**S-Figure 12.** **a)** Significantly enriched GSEA Hallmark gene sets (FDR<0.05) in response to different toxicant exposures in females and males across three life stages. wl: weaning at 3 weeks; adt: adulthood at 5 months; aged: adulthood at 10 months. **b)** The 3D PCA plot of female and male samples at three stages of mouse liver at the transcriptome level. **c-d)** Significant expression changes of genes predominantly expressed in females or males in female and male animals exposed to early-life DEHP, PM2.5-CHI, or Pb exposure.

**S-Figure 13.** **The differentially expressed genes (DEGs) in 5-month blood.** **a)** Expression changes of multiple-exposure-shared DEGs across exposures in 5-month-old male blood. The bottom legend represents log2 fold change of gene expression in exposure compared to control. The red and blue colors indicate whether the gene was upregulated or downregulated under exposures. **b)** Expression changes of shared genes between PM2.5-JHU signatures and TBT signatures in male blood (left) and liver (right). The x- and y-axes show the log2 fold change of shared genes responding to PM2.5-JHU and TBT. **c)** The tissue distribution of exposure-induced DEGs in 5-month-old liver and blood for females (top) and males (bottom). Very few genes are affected by exposure in both liver and blood. Liver-specific: exposure-induced DEGs found only in liver; blood-specific: exposure-induced DEGs found only in blood; common: DEGs shared by both liver and blood in the same exposure.
