# Supplementary material for: Toxicogenomic Insights into Environmental Toxicant Exposures: The TaRGET II Resource
Source: Research Square preprint supplement (doi:10.21203/rs.3.rs-7285514/v1), 2025-08-20
Supplement: Supplementary file 11 [file d5d79dda455742b6f6d9044f.xlsx]

## Sheet: Female_Biology_Process
Cluster	ID	Name	p-value	q-value FDR B&H	Hit Count in Query List	Hit Count in Genome
Cluster1	GO:0000278	mitotic cell cycle	1.686e-46	1.454e-42	210	1089
Cluster1	GO:1903047	mitotic cell cycle process	7.244e-41	3.124e-37	179	907
Cluster1	GO:0022402	cell cycle process	3.707e-40	1.066e-36	246	1532
Cluster1	GO:0007059	chromosome segregation	2.23e-38	4.808e-35	122	488
Cluster1	GO:0000280	nuclear division	3.224e-36	5.561e-33	124	526
Cluster1	GO:0098813	nuclear chromosome segregation	1.106e-33	1.589e-30	99	372
Cluster1	GO:0048285	organelle fission	2.642e-33	3.255e-30	127	584
Cluster1	GO:0051276	chromosome organization	1.163e-32	1.254e-29	139	690
Cluster1	GO:0051301	cell division	2.568e-32	2.27e-29	144	737
Cluster1	GO:0000819	sister chromatid segregation	2.632e-32	2.27e-29	80	259
Cluster1	GO:0140014	mitotic nuclear division	1.402e-31	1.099e-28	90	330
Cluster1	GO:0000070	mitotic sister chromatid segregation	1.057e-30	7.595e-28	71	216
Cluster1	GO:0006259	DNA metabolic process	3.193e-22	2.118e-19	171	1187
Cluster1	GO:0006261	DNA-templated DNA replication	6.51e-22	4.011e-19	54	177
Cluster1	GO:0051983	regulation of chromosome segregation	1.316e-21	7.567e-19	48	143
Cluster1	GO:0010564	regulation of cell cycle process	1.776e-21	9.571e-19	141	906
Cluster1	GO:0006281	DNA repair	2.976e-21	1.51e-18	112	639
Cluster1	GO:0051726	regulation of cell cycle	6.356e-21	3.046e-18	185	1367
Cluster1	GO:1905818	regulation of chromosome separation	1.742e-20	7.907e-18	35	80
Cluster1	GO:0044772	mitotic cell cycle phase transition	2.457e-20	1.059e-17	98	531
Cluster1	GO:0051304	chromosome separation	1.208e-19	4.963e-17	36	89
Cluster1	GO:0006260	DNA replication	4.381e-19	1.717e-16	70	318
Cluster1	GO:0007346	regulation of mitotic cell cycle	5.856e-19	2.196e-16	105	618
Cluster1	GO:0044770	cell cycle phase transition	4.162e-18	1.496e-15	109	672
Cluster1	GO:0007088	regulation of mitotic nuclear division	1.021e-17	3.521e-15	43	141
Cluster1	GO:0045229	external encapsulating structure organization	2.041e-17	6.769e-15	77	398
Cluster1	GO:0030198	extracellular matrix organization	3.942e-17	1.259e-14	76	394
Cluster1	GO:0043062	extracellular structure organization	4.571e-17	1.408e-14	76	395
Cluster1	GO:1901990	regulation of mitotic cell cycle phase transition	6.601e-17	1.963e-14	77	406
Cluster1	GO:0033044	regulation of chromosome organization	9.546e-17	2.744e-14	60	270
Cluster1	GO:0000075	cell cycle checkpoint signaling	1.942e-16	5.402e-14	53	221
Cluster1	GO:0007093	mitotic cell cycle checkpoint signaling	2.072e-16	5.585e-14	45	165
Cluster1	GO:0031577	spindle checkpoint signaling	2.351e-16	6.145e-14	26	56
Cluster1	GO:0051783	regulation of nuclear division	2.878e-16	7.3e-14	47	180
Cluster1	GO:0000086	G2/M transition of mitotic cell cycle	4.89e-16	1.205e-13	43	155
Cluster1	GO:0033045	regulation of sister chromatid segregation	7.213e-16	1.728e-13	36	112
Cluster1	GO:1902850	microtubule cytoskeleton organization involved in mitosis	7.724e-16	1.801e-13	51	213
Cluster1	GO:0006974	DNA damage response	8.491e-16	1.927e-13	132	955
Cluster1	GO:0007010	cytoskeleton organization	1.004e-15	2.221e-13	205	1759
Cluster1	GO:0090068	positive regulation of cell cycle process	1.106e-15	2.386e-13	64	316
Cluster1	GO:0010965	regulation of mitotic sister chromatid separation	1.246e-15	2.622e-13	27	64
Cluster1	GO:0044784	metaphase/anaphase transition of cell cycle	2.582e-15	5.302e-13	34	104
Cluster1	GO:0140013	meiotic nuclear division	3.317e-15	6.654e-13	54	243
Cluster1	GO:1902099	regulation of metaphase/anaphase transition of cell cycle	3.474e-15	6.81e-13	33	99
Cluster1	GO:0051985	negative regulation of chromosome segregation	4.678e-15	8.967e-13	25	57
Cluster1	GO:0051306	mitotic sister chromatid separation	4.964e-15	9.307e-13	27	67
Cluster1	GO:0007091	metaphase/anaphase transition of mitotic cell cycle	6.753e-15	1.218e-12	33	101
Cluster1	GO:0071174	mitotic spindle checkpoint signaling	6.779e-15	1.218e-12	24	53
Cluster1	GO:0090329	regulation of DNA-templated DNA replication	7.702e-15	1.355e-12	25	58
Cluster1	GO:0033043	regulation of organelle organization	7.855e-15	1.355e-12	170	1395
Cluster1	GO:0030071	regulation of mitotic metaphase/anaphase transition	9.09e-15	1.537e-12	32	96
Cluster1	GO:1901987	regulation of cell cycle phase transition	1.049e-14	1.74e-12	88	545
Cluster1	GO:0072359	circulatory system development	1.888e-14	2.979e-12	219	1974
Cluster1	GO:1902100	negative regulation of metaphase/anaphase transition of cell cycle	1.9e-14	2.979e-12	24	55
Cluster1	GO:1905819	negative regulation of chromosome separation	1.9e-14	2.979e-12	24	55
Cluster1	GO:0045839	negative regulation of mitotic nuclear division	1.967e-14	3.03e-12	26	65
Cluster1	GO:1903046	meiotic cell cycle process	2.629e-14	3.978e-12	59	295
Cluster1	GO:0007051	spindle organization	3.291e-14	4.894e-12	53	248
Cluster1	GO:0051321	meiotic cell cycle	5.739e-14	8.39e-12	68	377
Cluster1	GO:0045787	positive regulation of cell cycle	6.933e-14	9.967e-12	74	432
Cluster1	GO:0033048	negative regulation of mitotic sister chromatid segregation	7.707e-14	1.039e-11	23	53
Cluster1	GO:0033046	negative regulation of sister chromatid segregation	7.707e-14	1.039e-11	23	53
Cluster1	GO:0045841	negative regulation of mitotic metaphase/anaphase transition	7.707e-14	1.039e-11	23	53
Cluster1	GO:2000816	negative regulation of mitotic sister chromatid separation	7.707e-14	1.039e-11	23	53
Cluster1	GO:0044839	cell cycle G2/M phase transition	1.321e-13	1.753e-11	45	194
Cluster1	GO:0000226	microtubule cytoskeleton organization	1.965e-13	2.556e-11	107	762
Cluster1	GO:0033047	regulation of mitotic sister chromatid segregation	1.985e-13	2.556e-11	24	60
Cluster1	GO:1901988	negative regulation of cell cycle phase transition	2.707e-13	3.433e-11	60	319
Cluster1	GO:0071173	spindle assembly checkpoint signaling	3.123e-13	3.848e-11	22	51
Cluster1	GO:0007094	mitotic spindle assembly checkpoint signaling	3.123e-13	3.848e-11	22	51
Cluster1	GO:0045930	negative regulation of mitotic cell cycle	4.089e-13	4.967e-11	56	288
Cluster1	GO:0010389	regulation of G2/M transition of mitotic cell cycle	5.703e-13	6.831e-11	33	116
Cluster1	GO:0006302	double-strand break repair	7.855e-13	9.281e-11	59	318
Cluster1	GO:0006270	DNA replication initiation	8.601e-13	1.002e-10	19	39
Cluster1	GO:0051784	negative regulation of nuclear division	1.031e-12	1.186e-10	26	75
Cluster1	GO:0010948	negative regulation of cell cycle process	1.36e-12	1.543e-10	66	384
Cluster1	GO:0007507	heart development	1.681e-12	1.883e-10	134	1077
Cluster1	GO:2001251	negative regulation of chromosome organization	2.205e-12	2.439e-10	31	108
Cluster1	GO:0051383	kinetochore organization	4.05e-12	4.422e-10	15	25
Cluster1	GO:1905820	positive regulation of chromosome separation	4.312e-12	4.624e-10	17	33
Cluster1	GO:1901991	negative regulation of mitotic cell cycle phase transition	4.342e-12	4.624e-10	46	221
Cluster1	GO:0030199	collagen fibril organization	7.638e-12	8.034e-10	25	75
Cluster1	GO:0045786	negative regulation of cell cycle	9.049e-12	9.404e-10	75	485
Cluster1	GO:0051310	metaphase chromosome alignment	1.459e-11	1.498e-09	26	83
Cluster1	GO:0006310	DNA recombination	2.278e-11	2.311e-09	61	362
Cluster1	GO:0051984	positive regulation of chromosome segregation	3.356e-11	3.366e-09	16	32
Cluster1	GO:0008608	attachment of spindle microtubules to kinetochore	5.181e-11	5.137e-09	19	47
Cluster1	GO:0140694	non-membrane-bounded organelle assembly	5.488e-11	5.379e-09	77	523
Cluster1	GO:0007127	meiosis I	5.699e-11	5.523e-09	35	150
Cluster1	GO:0007052	mitotic spindle organization	6.752e-11	6.471e-09	37	166
Cluster1	GO:0097435	supramolecular fiber organization	7.391e-11	7.005e-09	123	1013
Cluster1	GO:0051052	regulation of DNA metabolic process	9.508e-11	8.914e-09	86	620
Cluster1	GO:0045132	meiotic chromosome segregation	1e-10	9.279e-09	33	138
Cluster1	GO:0000724	double-strand break repair via homologous recombination	1.211e-10	1.111e-08	38	177
Cluster1	GO:0044786	cell cycle DNA replication	1.231e-10	1.117e-08	19	49
Cluster1	GO:0033260	nuclear DNA replication	1.319e-10	1.185e-08	18	44
Cluster1	GO:0007080	mitotic metaphase chromosome alignment	1.373e-10	1.221e-08	22	66
Cluster1	GO:0007517	muscle organ development	2.3e-10	2.024e-08	79	559
Cluster1	GO:0000725	recombinational repair	2.41e-10	2.1e-08	38	181
Cluster1	GO:0051225	spindle assembly	3.287e-10	2.835e-08	36	167
Cluster1	GO:0000281	mitotic cytokinesis	6.79e-10	5.798e-08	26	97
Cluster1	GO:0061061	muscle structure development	6.909e-10	5.842e-08	122	1038
Cluster1	GO:0010639	negative regulation of organelle organization	1.031e-09	8.635e-08	64	426
Cluster1	GO:0045931	positive regulation of mitotic cell cycle	1.064e-09	8.825e-08	34	158
Cluster1	GO:0051303	establishment of chromosome localization	1.1e-09	9.035e-08	26	99
Cluster1	GO:1902749	regulation of cell cycle G2/M phase transition	1.227e-09	9.988e-08	33	151
Cluster1	GO:0061982	meiosis I cell cycle process	1.281e-09	1.032e-07	36	175
Cluster1	GO:0006268	DNA unwinding involved in DNA replication	1.33e-09	1.062e-07	12	21
Cluster1	GO:0050000	chromosome localization	1.389e-09	1.099e-07	27	107
Cluster1	GO:0032508	DNA duplex unwinding	1.453e-09	1.14e-07	23	80
Cluster1	GO:0032392	DNA geometric change	2.088e-09	1.623e-07	24	88
Cluster1	GO:1901989	positive regulation of cell cycle phase transition	3.977e-09	3.063e-07	31	142
Cluster1	GO:0048646	anatomical structure formation involved in morphogenesis	4.714e-09	3.598e-07	192	1910
Cluster1	GO:0000727	double-strand break repair via break-induced replication	4.932e-09	3.731e-07	9	12
Cluster1	GO:0034508	centromere complex assembly	5.286e-09	3.965e-07	14	32
Cluster1	GO:0030029	actin filament-based process	6.776e-09	5.038e-07	113	975
Cluster1	GO:1901992	positive regulation of mitotic cell cycle phase transition	9.254e-09	6.822e-07	27	116
Cluster1	GO:0051988	regulation of attachment of spindle microtubules to kinetochore	1.145e-08	8.228e-07	11	20
Cluster1	GO:0007076	mitotic chromosome condensation	1.145e-08	8.228e-07	11	20
Cluster1	GO:0051382	kinetochore assembly	1.145e-08	8.228e-07	11	20
Cluster1	GO:0060537	muscle tissue development	1.306e-08	9.308e-07	87	696
Cluster1	GO:0006275	regulation of DNA replication	1.324e-08	9.362e-07	32	157
Cluster1	GO:0071103	DNA conformation change	1.374e-08	9.636e-07	24	96
Cluster1	GO:0030261	chromosome condensation	1.712e-08	1.191e-06	17	51
Cluster1	GO:1902969	mitotic DNA replication	2.262e-08	1.561e-06	10	17
Cluster1	GO:0061640	cytoskeleton-dependent cytokinesis	3.032e-08	2.075e-06	28	130
Cluster1	GO:1900262	regulation of DNA-directed DNA polymerase activity	3.966e-08	2.652e-06	9	14
Cluster1	GO:1900264	positive regulation of DNA-directed DNA polymerase activity	3.966e-08	2.652e-06	9	14
Cluster1	GO:0060623	regulation of chromosome condensation	3.966e-08	2.652e-06	9	14
Cluster1	GO:0051129	negative regulation of cellular component organization	4.406e-08	2.923e-06	103	894
Cluster1	GO:1905821	positive regulation of chromosome condensation	4.562e-08	3.003e-06	7	8
Cluster1	GO:0070925	organelle assembly	8.968e-08	5.859e-06	133	1259
Cluster1	GO:0030174	regulation of DNA-templated DNA replication initiation	9.323e-08	6.001e-06	9	15
Cluster1	GO:0051231	spindle elongation	9.323e-08	6.001e-06	9	15
Cluster1	GO:0034501	protein localization to kinetochore	9.487e-08	6.017e-06	10	19
Cluster1	GO:1903083	protein localization to condensed chromosome	9.487e-08	6.017e-06	10	19
Cluster1	GO:0001944	vasculature development	1.235e-07	7.775e-06	132	1254
Cluster1	GO:0051256	mitotic spindle midzone assembly	1.567e-07	9.796e-06	8	12
Cluster1	GO:0007017	microtubule-based process	2.07e-07	1.284e-05	119	1110
Cluster1	GO:0090307	mitotic spindle assembly	2.866e-07	1.765e-05	22	96
Cluster1	GO:1901970	positive regulation of mitotic sister chromatid separation	3.199e-07	1.957e-05	10	21
Cluster1	GO:0035825	homologous recombination	3.491e-07	2.121e-05	19	75
Cluster1	GO:0000022	mitotic spindle elongation	3.834e-07	2.312e-05	8	13
Cluster1	GO:0000910	cytokinesis	4.24e-07	2.54e-05	35	208
Cluster1	GO:0055001	muscle cell development	4.576e-07	2.722e-05	53	384
Cluster1	GO:0001568	blood vessel development	5.748e-07	3.396e-05	122	1168
Cluster1	GO:0007155	cell adhesion	5.82e-07	3.415e-05	168	1735
Cluster1	GO:1903490	positive regulation of mitotic cytokinesis	5.979e-07	3.484e-05	6	7
Cluster1	GO:0051302	regulation of cell division	6.753e-07	3.909e-05	35	212
Cluster1	GO:0031589	cell-substrate adhesion	7.335e-07	4.218e-05	56	421
Cluster1	GO:0045005	DNA-templated DNA replication maintenance of fidelity	8.426e-07	4.813e-05	16	58
Cluster1	GO:0071897	DNA biosynthetic process	1.019e-06	5.782e-05	36	225
Cluster1	GO:0042692	muscle cell differentiation	1.051e-06	5.925e-05	78	666
Cluster1	GO:0010972	negative regulation of G2/M transition of mitotic cell cycle	1.087e-06	6.089e-05	18	73
Cluster1	GO:0030036	actin cytoskeleton organization	1.256e-06	6.987e-05	96	876
Cluster1	GO:0007160	cell-matrix adhesion	1.375e-06	7.602e-05	41	276
Cluster1	GO:0007057	spindle assembly involved in female meiosis I	1.458e-06	8.009e-05	5	5
Cluster1	GO:0051315	attachment of mitotic spindle microtubules to kinetochore	1.476e-06	8.058e-05	10	24
Cluster1	GO:0001945	lymph vessel development	1.528e-06	8.291e-05	19	82
Cluster1	GO:1902750	negative regulation of cell cycle G2/M phase transition	1.662e-06	8.962e-05	18	75
Cluster1	GO:0007143	female meiotic nuclear division	1.679e-06	8.98e-05	15	54
Cluster1	GO:2001046	positive regulation of integrin-mediated signaling pathway	1.697e-06	8.98e-05	8	15
Cluster1	GO:0051255	spindle midzone assembly	1.697e-06	8.98e-05	8	15
Cluster1	GO:0031570	DNA integrity checkpoint signaling	1.766e-06	9.287e-05	27	148
Cluster1	GO:0051338	regulation of transferase activity	1.833e-06	9.582e-05	106	1002
Cluster1	GO:0140527	reciprocal homologous recombination	2.178e-06	0.0001125	17	69
Cluster1	GO:0007131	reciprocal meiotic recombination	2.178e-06	0.0001125	17	69
Cluster1	GO:0051053	negative regulation of DNA metabolic process	2.387e-06	0.0001226	29	168
Cluster1	GO:0010971	positive regulation of G2/M transition of mitotic cell cycle	2.898e-06	0.0001479	11	31
Cluster1	GO:0006271	DNA strand elongation involved in DNA replication	3.194e-06	0.000162	8	16
Cluster1	GO:0031297	replication fork processing	3.349e-06	0.0001689	14	50
Cluster1	GO:0044818	mitotic G2/M transition checkpoint	3.537e-06	0.0001759	15	57
Cluster1	GO:0090267	positive regulation of mitotic cell cycle spindle assembly checkpoint	3.549e-06	0.0001759	7	12
Cluster1	GO:0090232	positive regulation of spindle checkpoint	3.549e-06	0.0001759	7	12
Cluster1	GO:0014706	striated muscle tissue development	3.847e-06	0.0001896	52	401
Cluster1	GO:0006936	muscle contraction	3.95e-06	0.0001936	53	412
Cluster1	GO:0048729	tissue morphogenesis	4.084e-06	0.000199	116	1141
Cluster1	GO:0070252	actin-mediated cell contraction	4.267e-06	0.0002068	23	120
Cluster1	GO:0003007	heart morphogenesis	4.307e-06	0.0002076	59	478
Cluster1	GO:0040001	establishment of mitotic spindle localization	4.476e-06	0.0002145	15	58
Cluster1	GO:0051781	positive regulation of cell division	4.684e-06	0.0002232	21	104
Cluster1	GO:0071459	protein localization to chromosome, centromeric region	5.105e-06	0.0002419	13	45
Cluster1	GO:0035239	tube morphogenesis	5.467e-06	0.0002577	143	1483
Cluster1	GO:0048514	blood vessel morphogenesis	6.306e-06	0.0002956	107	1042
Cluster1	GO:0030218	erythrocyte differentiation	6.393e-06	0.000298	37	253
Cluster1	GO:0001525	angiogenesis	6.625e-06	0.0003072	94	887
Cluster1	GO:0010032	meiotic chromosome condensation	7.674e-06	0.000354	5	6
Cluster1	GO:1902751	positive regulation of cell cycle G2/M phase transition	8.12e-06	0.0003725	11	34
Cluster1	GO:0034101	erythrocyte homeostasis	8.407e-06	0.0003837	38	266
Cluster1	GO:0033275	actin-myosin filament sliding	9.617e-06	0.0004366	8	18
Cluster1	GO:0051493	regulation of cytoskeleton organization	9.992e-06	0.0004512	70	615
Cluster1	GO:0051293	establishment of spindle localization	1.074e-05	0.0004823	17	77
Cluster1	GO:0006282	regulation of DNA repair	1.184e-05	0.000529	34	230
Cluster1	GO:0007144	female meiosis I	1.364e-05	0.0006065	7	14
Cluster1	GO:0090231	regulation of spindle checkpoint	1.4e-05	0.0006192	9	24
Cluster1	GO:0032467	positive regulation of cytokinesis	1.427e-05	0.000628	13	49
Cluster1	GO:1902412	regulation of mitotic cytokinesis	1.502e-05	0.0006576	6	10
Cluster1	GO:0000076	DNA replication checkpoint signaling	1.563e-05	0.0006794	8	19
Cluster1	GO:0060538	skeletal muscle organ development	1.567e-05	0.0006794	45	346
Cluster1	GO:0035295	tube development	1.791e-05	0.0007723	170	1864
Cluster1	GO:0030048	actin filament-based movement	1.918e-05	0.0008232	25	149
Cluster1	GO:0003206	cardiac chamber morphogenesis	1.939e-05	0.000828	28	177
Cluster1	GO:0007098	centrosome cycle	2.028e-05	0.0008617	27	168
Cluster1	GO:0044774	mitotic DNA integrity checkpoint signaling	2.066e-05	0.0008734	19	97
Cluster1	GO:0051653	spindle localization	2.178e-05	0.000914	17	81
Cluster1	GO:0051294	establishment of spindle orientation	2.183e-05	0.000914	14	58
Cluster1	GO:0008284	positive regulation of cell population proliferation	2.266e-05	0.0009443	121	1247
Cluster1	GO:0000132	establishment of mitotic spindle orientation	2.282e-05	0.0009463	13	51
Cluster1	GO:0030049	muscle filament sliding	2.409e-05	0.0009943	7	15
Cluster1	GO:0007062	sister chromatid cohesion	2.429e-05	0.0009978	15	66
Cluster1	GO:2000779	regulation of double-strand break repair	2.468e-05	0.001009	24	142
Cluster1	GO:0032465	regulation of cytokinesis	2.79e-05	0.001135	19	99
Cluster1	GO:0051146	striated muscle cell differentiation	2.939e-05	0.00119	58	498
Cluster1	GO:0003012	muscle system process	2.981e-05	0.001201	63	555
Cluster1	GO:2001252	positive regulation of chromosome organization	3.109e-05	0.001227	21	117
Cluster1	GO:0034080	CENP-A containing chromatin assembly	3.116e-05	0.001227	6	11
Cluster1	GO:0007056	spindle assembly involved in female meiosis	3.116e-05	0.001227	6	11
Cluster1	GO:0051307	meiotic chromosome separation	3.116e-05	0.001227	6	11
Cluster1	GO:0031055	chromatin remodeling at centromere	3.116e-05	0.001227	6	11
Cluster1	GO:0048738	cardiac muscle tissue development	3.286e-05	0.001288	47	378
Cluster1	GO:0051445	regulation of meiotic cell cycle	3.436e-05	0.001341	18	92
Cluster1	GO:0035162	embryonic hemopoiesis	3.546e-05	0.001369	21	118
Cluster1	GO:0048644	muscle organ morphogenesis	3.546e-05	0.001369	21	118
Cluster1	GO:1901976	regulation of cell cycle checkpoint	3.555e-05	0.001369	13	53
Cluster1	GO:0010569	regulation of double-strand break repair via homologous recombination	3.623e-05	0.001389	16	76
Cluster1	GO:0071711	basement membrane organization	3.653e-05	0.001394	12	46
Cluster1	GO:0006941	striated muscle contraction	3.85e-05	0.001463	32	223
Cluster1	GO:0060415	muscle tissue morphogenesis	3.93e-05	0.001487	20	110
Cluster1	GO:0007096	regulation of exit from mitosis	4.176e-05	0.001573	9	27
Cluster1	GO:0048872	homeostasis of number of cells	4.226e-05	0.001585	62	550
Cluster1	GO:0070192	chromosome organization involved in meiotic cell cycle	4.291e-05	0.001602	16	77
Cluster1	GO:0007095	mitotic G2 DNA damage checkpoint signaling	4.517e-05	0.001672	11	40
Cluster1	GO:0000077	DNA damage checkpoint signaling	4.535e-05	0.001672	23	138
Cluster1	GO:0007229	integrin-mediated signaling pathway	4.535e-05	0.001672	23	138
Cluster1	GO:0031023	microtubule organizing center organization	4.863e-05	0.001785	28	186
Cluster1	GO:0019953	sexual reproduction	4.947e-05	0.001808	127	1345
Cluster1	GO:1903504	regulation of mitotic spindle checkpoint	5.515e-05	0.001984	8	22
Cluster1	GO:0090266	regulation of mitotic cell cycle spindle assembly checkpoint	5.515e-05	0.001984	8	22
Cluster1	GO:0043101	purine-containing compound salvage	5.515e-05	0.001984	8	22
Cluster1	GO:0032963	collagen metabolic process	5.52e-05	0.001984	24	149
Cluster1	GO:0048251	elastic fiber assembly	5.878e-05	0.002086	6	12
Cluster1	GO:0051987	positive regulation of attachment of spindle microtubules to kinetochore	5.878e-05	0.002086	6	12
Cluster1	GO:0038063	collagen-activated tyrosine kinase receptor signaling pathway	5.878e-05	0.002086	6	12
Cluster1	GO:0044093	positive regulation of molecular function	5.928e-05	0.002096	161	1788
Cluster1	GO:0009611	response to wounding	6.922e-05	0.002437	79	760
Cluster1	GO:0032506	cytokinetic process	7.18e-05	0.002517	12	49
Cluster1	GO:0051347	positive regulation of transferase activity	7.863e-05	0.002746	68	632
Cluster1	GO:0001946	lymphangiogenesis	8.047e-05	0.002788	13	57
Cluster1	GO:0031099	regeneration	8.05e-05	0.002788	48	403
Cluster1	GO:0032989	cellular anatomical entity morphogenesis	9.422e-05	0.003227	111	1162
Cluster1	GO:0007264	small GTPase mediated signal transduction	9.516e-05	0.003227	61	554
Cluster1	GO:1902315	nuclear cell cycle DNA replication initiation	9.577e-05	0.003227	4	5
Cluster1	GO:1902292	cell cycle DNA replication initiation	9.577e-05	0.003227	4	5
Cluster1	GO:1902975	mitotic DNA replication initiation	9.577e-05	0.003227	4	5
Cluster1	GO:1903932	regulation of DNA primase activity	9.577e-05	0.003227	4	5
Cluster1	GO:1903934	positive regulation of DNA primase activity	9.577e-05	0.003227	4	5
Cluster1	GO:0014904	myotube cell development	9.647e-05	0.003238	19	108
Cluster1	GO:1901978	positive regulation of cell cycle checkpoint	9.962e-05	0.003318	7	18
Cluster1	GO:0038065	collagen-activated signaling pathway	9.962e-05	0.003318	7	18
Cluster1	GO:0060840	artery development	0.0001047	0.003474	24	155
Cluster1	GO:2001044	regulation of integrin-mediated signaling pathway	0.0001124	0.003714	8	24
Cluster1	GO:0009887	animal organ morphogenesis	0.0001144	0.003765	154	1720
Cluster1	GO:0061484	hematopoietic stem cell homeostasis	0.0001169	0.003833	11	44
Cluster1	GO:2000780	negative regulation of double-strand break repair	0.0001174	0.003835	10	37
Cluster1	GO:0085029	extracellular matrix assembly	0.0001332	0.004334	12	52
Cluster1	GO:0010638	positive regulation of organelle organization	0.0001337	0.004334	64	596
Cluster1	GO:0003205	cardiac chamber development	0.0001359	0.004382	32	238
Cluster1	GO:0044773	mitotic DNA damage checkpoint signaling	0.0001362	0.004382	17	93
Cluster1	GO:0032886	regulation of microtubule-based process	0.000161	0.005164	38	304
Cluster1	GO:0007519	skeletal muscle tissue development	0.0001637	0.005228	40	326
Cluster1	GO:0042060	wound healing	0.0001761	0.005606	59	543
Cluster1	GO:0051130	positive regulation of cellular component organization	0.0001775	0.005627	129	1411
Cluster1	GO:0048741	skeletal muscle fiber development	0.0001806	0.005706	18	104
Cluster1	GO:0071824	protein-DNA complex organization	0.0001888	0.00592	92	944
Cluster1	GO:0022616	DNA strand elongation	0.0001894	0.00592	10	39
Cluster1	GO:0045738	negative regulation of DNA repair	0.0001894	0.00592	10	39
Cluster1	GO:0035987	endodermal cell differentiation	0.0001952	0.006078	14	70
Cluster1	GO:0032970	regulation of actin filament-based process	0.0001972	0.00612	52	464
Cluster1	GO:0002262	myeloid cell homeostasis	0.0001987	0.006144	40	329
Cluster1	GO:0036303	lymph vessel morphogenesis	0.0001996	0.006148	13	62
Cluster1	GO:0019220	regulation of phosphate metabolic process	0.0002082	0.006389	143	1598
Cluster1	GO:0045859	regulation of protein kinase activity	0.0002116	0.006471	75	738
Cluster1	GO:0001654	eye development	0.0002135	0.006473	83	836
Cluster1	GO:0051174	regulation of phosphorus metabolic process	0.000214	0.006473	143	1599
Cluster1	GO:0032964	collagen biosynthetic process	0.0002144	0.006473	15	79
Cluster1	GO:0030097	hemopoiesis	0.0002146	0.006473	138	1534
Cluster1	GO:0035476	angioblast cell migration	0.0002154	0.006474	7	20
Cluster1	GO:1905314	semi-lunar valve development	0.0002204	0.006602	11	47
Cluster1	GO:0007265	Ras protein signal transduction	0.0002255	0.006729	46	398
Cluster1	GO:0031399	regulation of protein modification process	0.0002292	0.006817	157	1785
Cluster1	GO:0003208	cardiac ventricle morphogenesis	0.0002313	0.006857	17	97
Cluster1	GO:0003158	endothelium development	0.0002322	0.006858	30	224
Cluster1	GO:0150063	visual system development	0.0002396	0.00703	83	839
Cluster1	GO:0071560	cellular response to transforming growth factor beta stimulus	0.0002404	0.00703	40	332
Cluster1	GO:0051056	regulation of small GTPase mediated signal transduction	0.0002404	0.00703	40	332
Cluster1	GO:0007292	female gamete generation	0.0002454	0.00715	34	267
Cluster1	GO:0060048	cardiac muscle contraction	0.0002543	0.00736	25	174
Cluster1	GO:0003231	cardiac ventricle development	0.0002543	0.00736	25	174
Cluster1	GO:0003149	membranous septum morphogenesis	0.0002563	0.007367	5	10
Cluster1	GO:0033314	mitotic DNA replication checkpoint signaling	0.0002563	0.007367	5	10
Cluster1	GO:2000278	regulation of DNA biosynthetic process	0.0002685	0.007642	22	145
Cluster1	GO:0051261	protein depolymerization	0.0002685	0.007642	22	145
Cluster1	GO:0000018	regulation of DNA recombination	0.0002685	0.007642	22	145
Cluster1	GO:0048568	embryonic organ development	0.0002697	0.007651	96	1004
Cluster1	GO:0000082	G1/S transition of mitotic cell cycle	0.0002707	0.007656	36	290
Cluster1	GO:1902462	positive regulation of mesenchymal stem cell proliferation	0.0002717	0.007658	4	6
Cluster1	GO:0006468	protein phosphorylation	0.0002895	0.008133	157	1794
Cluster1	GO:0051247	positive regulation of protein metabolic process	0.000291	0.008148	150	1702
Cluster1	GO:0055008	cardiac muscle tissue morphogenesis	0.0002955	0.008247	16	90
Cluster1	GO:0042325	regulation of phosphorylation	0.0003003	0.008356	128	1416
Cluster1	GO:0071559	response to transforming growth factor beta	0.0003082	0.008547	40	336
Cluster1	GO:0001503	ossification	0.0003298	0.00909	60	568
Cluster1	GO:0044843	cell cycle G1/S phase transition	0.0003299	0.00909	39	326
Cluster1	GO:0035904	aorta development	0.0003365	0.009244	16	91
Cluster1	GO:2000573	positive regulation of DNA biosynthetic process	0.000376	0.0103	15	83
Cluster1	GO:0003013	circulatory system process	0.0004256	0.01162	82	842
Cluster1	GO:0003151	outflow tract morphogenesis	0.0004277	0.01164	17	102
Cluster1	GO:0042246	tissue regeneration	0.0004803	0.01303	27	202
Cluster1	GO:0043085	positive regulation of catalytic activity	0.0004835	0.01306	119	1316
Cluster1	GO:0060841	venous blood vessel development	0.0004845	0.01306	9	36
Cluster1	GO:0030903	notochord development	0.0004905	0.01318	16	94
Cluster1	GO:0000902	cell morphogenesis	0.0004992	0.01337	122	1356
Cluster1	GO:0065004	protein-DNA complex assembly	0.0005108	0.01364	32	256
Cluster1	GO:0003170	heart valve development	0.0005395	0.01436	17	104
Cluster1	GO:2000042	negative regulation of double-strand break repair via homologous recombination	0.0005702	0.01507	7	23
Cluster1	GO:0018205	peptidyl-lysine modification	0.0005711	0.01507	44	392
Cluster1	GO:0061515	myeloid cell development	0.0005714	0.01507	23	163
Cluster1	GO:0060485	mesenchyme development	0.0005738	0.01509	53	497
Cluster1	GO:0045842	positive regulation of mitotic metaphase/anaphase transition	0.0005879	0.01541	6	17
Cluster1	GO:0060215	primitive hemopoiesis	0.0005995	0.01564	13	69
Cluster1	GO:0051573	negative regulation of histone H3-K9 methylation	0.0006001	0.01564	4	7
Cluster1	GO:0045814	negative regulation of gene expression, epigenetic	0.0006198	0.0161	20	134
Cluster1	GO:0051785	positive regulation of nuclear division	0.0006258	0.01621	14	78
Cluster1	GO:0030099	myeloid cell differentiation	0.0006313	0.0163	69	692
Cluster1	GO:0003015	heart process	0.0006507	0.01675	45	406
Cluster1	GO:0043549	regulation of kinase activity	0.0006537	0.01675	82	854
Cluster1	GO:0016331	morphogenesis of embryonic epithelium	0.0006546	0.01675	30	238
Cluster1	GO:0044848	biological phase	0.0006659	0.01694	11	53
Cluster1	GO:0045910	negative regulation of DNA recombination	0.0006659	0.01694	11	53
Cluster1	GO:0030010	establishment of cell polarity	0.0006795	0.01724	26	196
Cluster1	GO:0006335	DNA replication-dependent chromatin assembly	0.0007189	0.01816	5	12
Cluster1	GO:0001667	ameboidal-type cell migration	0.0007202	0.01816	71	720
Cluster1	GO:0003180	aortic valve morphogenesis	0.0007431	0.01868	9	38
Cluster1	GO:0048762	mesenchymal cell differentiation	0.0007651	0.01916	43	386
Cluster1	GO:0006338	chromatin remodeling	0.0007665	0.01916	69	697
Cluster1	GO:1903115	regulation of actin filament-based movement	0.0007863	0.01958	11	54
Cluster1	GO:0002009	morphogenesis of an epithelium	0.0007879	0.01958	91	973
Cluster1	GO:0001932	regulation of protein phosphorylation	0.000803	0.0199	116	1295
Cluster1	GO:0014823	response to activity	0.0008085	0.01998	15	89
Cluster1	GO:0003179	heart valve morphogenesis	0.0008134	0.02004	14	80
Cluster1	GO:0001841	neural tube formation	0.0008186	0.02011	22	157
Cluster1	GO:1902101	positive regulation of metaphase/anaphase transition of cell cycle	0.0008321	0.02039	6	18
Cluster1	GO:0000003	reproduction	0.0008624	0.02107	166	1959
Cluster1	GO:0071495	cellular response to endogenous stimulus	0.0008696	0.02119	160	1879
Cluster1	GO:0022414	reproductive process	0.0008904	0.02163	165	1947
Cluster1	GO:0036297	interstrand cross-link repair	0.0009091	0.02203	9	39
Cluster1	GO:0007584	response to nutrient	0.0009209	0.02225	26	200
Cluster1	GO:0060412	ventricular septum morphogenesis	0.0009241	0.02226	11	55
Cluster1	GO:0051446	positive regulation of meiotic cell cycle	0.0009447	0.0227	10	47
Cluster1	GO:0014070	response to organic cyclic compound	0.0009613	0.02297	103	1133
Cluster1	GO:0014902	myotube differentiation	0.0009641	0.02297	28	222
Cluster1	GO:0046578	regulation of Ras protein signal transduction	0.0009641	0.02297	28	222
Cluster1	GO:0034502	protein localization to chromosome	0.0009921	0.02357	20	139
Cluster1	GO:0040011	locomotion	0.001063	0.02519	158	1861
Cluster1	GO:0090224	regulation of spindle organization	0.001081	0.02551	11	56
Cluster1	GO:0031401	positive regulation of protein modification process	0.001083	0.02551	104	1150
Cluster1	GO:0008015	blood circulation	0.001088	0.02551	73	756
Cluster1	GO:0060047	heart contraction	0.001098	0.02551	43	393
Cluster1	GO:0072182	regulation of nephron tubule epithelial cell differentiation	0.001104	0.02551	5	13
Cluster1	GO:0044027	negative regulation of gene expression via CpG island methylation	0.001104	0.02551	5	13
Cluster1	GO:1904238	pericyte cell differentiation	0.001104	0.02551	5	13
Cluster1	GO:0000212	meiotic spindle organization	0.001104	0.02551	9	40
Cluster1	GO:1900026	positive regulation of substrate adhesion-dependent cell spreading	0.001123	0.02551	10	48
Cluster1	GO:0051693	actin filament capping	0.001123	0.02551	10	48
Cluster1	GO:0001649	osteoblast differentiation	0.001125	0.02551	36	313
Cluster1	GO:0030031	cell projection assembly	0.001125	0.02551	77	807
Cluster1	GO:1902460	regulation of mesenchymal stem cell proliferation	0.001136	0.02551	4	8
Cluster1	GO:1902425	positive regulation of attachment of mitotic spindle microtubules to kinetochore	0.001136	0.02551	4	8
Cluster1	GO:0016321	female meiosis chromosome segregation	0.001136	0.02551	4	8
Cluster1	GO:0003184	pulmonary valve morphogenesis	0.001148	0.02551	6	19
Cluster1	GO:0086066	atrial cardiac muscle cell to AV node cell communication	0.001148	0.02551	6	19
Cluster1	GO:0086026	atrial cardiac muscle cell to AV node cell signaling	0.001148	0.02551	6	19
Cluster1	GO:0086014	atrial cardiac muscle cell action potential	0.001148	0.02551	6	19
Cluster1	GO:0032261	purine nucleotide salvage	0.001148	0.02551	6	19
Cluster1	GO:0010927	cellular component assembly involved in morphogenesis	0.001148	0.02551	26	203
Cluster1	GO:0061209	cell proliferation involved in mesonephros development	0.001148	0.02551	3	4
Cluster1	GO:0035583	sequestering of TGFbeta in extracellular matrix	0.001148	0.02551	3	4
Cluster1	GO:1990086	lens fiber cell apoptotic process	0.001148	0.02551	3	4
Cluster1	GO:0042327	positive regulation of phosphorylation	0.00115	0.02551	87	934
Cluster1	GO:0061383	trabecula morphogenesis	0.001159	0.02563	12	65
Cluster1	GO:1903522	regulation of blood circulation	0.001169	0.02575	41	371
Cluster1	GO:0001837	epithelial to mesenchymal transition	0.00117	0.02575	27	214
Cluster1	GO:0031101	fin regeneration	0.001189	0.02609	13	74
Cluster1	GO:0043242	negative regulation of protein-containing complex disassembly	0.001224	0.02672	16	102
Cluster1	GO:0019229	regulation of vasoconstriction	0.001224	0.02672	16	102
Cluster1	GO:0051054	positive regulation of DNA metabolic process	0.001238	0.02696	39	349
Cluster1	GO:0072175	epithelial tube formation	0.001255	0.02724	27	215
Cluster1	GO:0070507	regulation of microtubule cytoskeleton organization	0.001257	0.02724	24	183
Cluster1	GO:0048871	multicellular organismal-level homeostasis	0.001286	0.02781	105	1169
Cluster1	GO:0060562	epithelial tube morphogenesis	0.001304	0.02811	59	588
Cluster1	GO:0000731	DNA synthesis involved in DNA repair	0.001332	0.02864	9	41
Cluster1	GO:0001838	embryonic epithelial tube formation	0.001356	0.02909	24	184
Cluster1	GO:0034446	substrate adhesion-dependent cell spreading	0.001406	0.03006	17	113
Cluster1	GO:0007163	establishment or maintenance of cell polarity	0.001408	0.03006	33	283
Cluster1	GO:1904029	regulation of cyclin-dependent protein kinase activity	0.001427	0.0304	18	123
Cluster1	GO:0001501	skeletal system development	0.001464	0.03109	79	840
Cluster1	GO:0034330	cell junction organization	0.001489	0.03156	88	955
Cluster1	GO:0009410	response to xenobiotic stimulus	0.001495	0.0316	57	567
Cluster1	GO:0042770	signal transduction in response to DNA damage	0.001525	0.03215	26	207
Cluster1	GO:0120031	plasma membrane bounded cell projection assembly	0.001537	0.03227	75	791
Cluster1	GO:0045765	regulation of angiogenesis	0.001538	0.03227	49	471
Cluster1	GO:0030239	myofibril assembly	0.001563	0.03264	19	134
Cluster1	GO:0048598	embryonic morphogenesis	0.001563	0.03264	106	1189
Cluster1	GO:0010458	exit from mitosis	0.001595	0.03324	9	42
Cluster1	GO:0022403	cell cycle phase	0.00163	0.03389	7	27
Cluster1	GO:0010811	positive regulation of cell-substrate adhesion	0.001636	0.03392	21	155
Cluster1	GO:0048844	artery morphogenesis	0.001673	0.03454	16	105
Cluster1	GO:0007492	endoderm development	0.001678	0.03454	20	145
Cluster1	GO:0055002	striated muscle cell development	0.001678	0.03454	20	145
Cluster1	GO:0001934	positive regulation of protein phosphorylation	0.00174	0.03573	80	858
Cluster1	GO:0061351	neural precursor cell proliferation	0.001747	0.0358	30	253
Cluster1	GO:0018193	peptidyl-amino acid modification	0.001773	0.03624	111	1259
Cluster1	GO:0007015	actin filament organization	0.001808	0.03686	53	523
Cluster1	GO:0051298	centrosome duplication	0.001883	0.03831	14	87
Cluster1	GO:0003176	aortic valve development	0.001899	0.03854	9	43
Cluster1	GO:1902423	regulation of attachment of mitotic spindle microtubules to kinetochore	0.001937	0.03913	4	9
Cluster1	GO:0017185	peptidyl-lysine hydroxylation	0.001937	0.03913	4	9
Cluster1	GO:0045907	positive regulation of vasoconstriction	0.001946	0.03922	11	60
Cluster1	GO:0045143	homologous chromosome segregation	0.001953	0.03927	13	78
Cluster1	GO:0046605	regulation of centrosome cycle	0.001981	0.03973	12	69
Cluster1	GO:0060429	epithelium development	0.00201	0.04022	166	1998
Cluster1	GO:0071363	cellular response to growth factor stimulus	0.002034	0.04061	84	914
Cluster1	GO:1901879	regulation of protein depolymerization	0.002043	0.04069	16	107
Cluster1	GO:0042310	vasoconstriction	0.002059	0.04091	18	127
Cluster1	GO:0060236	regulation of mitotic spindle organization	0.002127	0.04217	10	52
Cluster1	GO:0009314	response to radiation	0.002132	0.04217	57	576
Cluster1	GO:0022412	cellular process involved in reproduction in multicellular organism	0.002149	0.04242	62	638
Cluster1	GO:0045860	positive regulation of protein kinase activity	0.002184	0.043	46	443
Cluster1	GO:0031032	actomyosin structure organization	0.002225	0.04365	33	291
Cluster1	GO:0090102	cochlea development	0.002233	0.04365	11	61
Cluster1	GO:0002052	positive regulation of neuroblast proliferation	0.002248	0.04365	9	44
Cluster1	GO:0060343	trabecula formation	0.00225	0.04365	8	36
Cluster1	GO:0061037	negative regulation of cartilage development	0.00225	0.04365	8	36
Cluster1	GO:0006301	postreplication repair	0.00225	0.04365	8	36
Cluster1	GO:0031507	heterochromatin formation	0.002252	0.04365	16	108
Cluster1	GO:0000079	regulation of cyclin-dependent protein serine/threonine kinase activity	0.002265	0.04371	17	118
Cluster1	GO:0070828	heterochromatin organization	0.002265	0.04371	17	118
Cluster1	GO:0090179	planar cell polarity pathway involved in neural tube closure	0.0023	0.04399	5	15
Cluster1	GO:0090235	regulation of metaphase plate congression	0.0023	0.04399	5	15
Cluster1	GO:0051177	meiotic sister chromatid cohesion	0.0023	0.04399	5	15
Cluster1	GO:0086067	AV node cell to bundle of His cell communication	0.0023	0.04399	5	15
Cluster1	GO:0042074	cell migration involved in gastrulation	0.002346	0.04477	14	89
Cluster1	GO:0048880	sensory system development	0.002377	0.04526	85	932
Cluster1	GO:0045446	endothelial cell differentiation	0.002415	0.04587	24	192
Cluster1	GO:0010212	response to ionizing radiation	0.002428	0.04602	21	160
Cluster1	GO:0045840	positive regulation of mitotic nuclear division	0.002467	0.04667	10	53
Cluster1	GO:0048858	cell projection morphogenesis	0.002475	0.04671	88	972
Cluster1	GO:0090306	meiotic spindle assembly	0.002547	0.04797	7	29
Cluster1	GO:0010718	positive regulation of epithelial to mesenchymal transition	0.002553	0.04798	11	62
Cluster1	GO:0034329	cell junction assembly	0.002573	0.04816	54	544
Cluster1	GO:1901342	regulation of vasculature development	0.002574	0.04816	49	483
Cluster1	GO:0006937	regulation of muscle contraction	0.002605	0.04863	26	215
Cluster1	GO:0060411	cardiac septum morphogenesis	0.002611	0.04863	14	90
Cluster1	GO:0061384	heart trabecula morphogenesis	0.002645	0.04903	9	45
Cluster1	GO:0072160	nephron tubule epithelial cell differentiation	0.002653	0.04903	6	22
Cluster1	GO:0009411	response to UV	0.002691	0.04903	22	172
Cluster1	GO:0006603	phosphocreatine metabolic process	0.002723	0.04903	3	5
Cluster1	GO:0042396	phosphagen biosynthetic process	0.002723	0.04903	3	5
Cluster1	GO:0036515	serotonergic neuron axon guidance	0.002723	0.04903	3	5
Cluster1	GO:0061341	non-canonical Wnt signaling pathway involved in heart development	0.002723	0.04903	3	5
Cluster1	GO:0006599	phosphagen metabolic process	0.002723	0.04903	3	5
Cluster1	GO:0060666	dichotomous subdivision of terminal units involved in salivary gland branching	0.002723	0.04903	3	5
Cluster1	GO:0046314	phosphocreatine biosynthetic process	0.002723	0.04903	3	5
Cluster1	GO:0099163	synaptic signaling by nitric oxide	0.002723	0.04903	3	5
Cluster1	GO:0007089	traversing start control point of mitotic cell cycle	0.002723	0.04903	3	5
Cluster1	GO:0072757	cellular response to camptothecin	0.002723	0.04903	3	5
Cluster1	GO:0051754	meiotic sister chromatid cohesion, centromeric	0.002723	0.04903	3	5
Cluster1	GO:1905784	regulation of anaphase-promoting complex-dependent catabolic process	0.002723	0.04903	3	5
Cluster1	GO:0018057	peptidyl-lysine oxidation	0.002723	0.04903	3	5
Cluster1	GO:0035148	tube formation	0.002734	0.04912	28	238
Cluster1	GO:0051099	positive regulation of binding	0.002761	0.04951	27	227
Cluster1	GO:2000026	regulation of multicellular organismal development	0.002779	0.04973	161	1946
Cluster2	GO:0044248	cellular catabolic process	1.943e-24	1.882e-20	269	1796
Cluster2	GO:0006635	fatty acid beta-oxidation	3.245e-17	1.572e-13	35	83
Cluster2	GO:0006629	lipid metabolic process	8.921e-17	2.882e-13	224	1599
Cluster2	GO:0044242	cellular lipid catabolic process	2.516e-16	6.096e-13	64	257
Cluster2	GO:0044255	cellular lipid metabolic process	3.489e-16	6.762e-13	172	1134
Cluster2	GO:0016054	organic acid catabolic process	1.945e-15	2.693e-12	66	281
Cluster2	GO:0046395	carboxylic acid catabolic process	1.945e-15	2.693e-12	66	281
Cluster2	GO:0009062	fatty acid catabolic process	2.914e-15	3.529e-12	40	120
Cluster2	GO:0032787	monocarboxylic acid metabolic process	3.689e-15	3.971e-12	124	738
Cluster2	GO:0016042	lipid catabolic process	4.712e-15	4.566e-12	80	387
Cluster2	GO:0019752	carboxylic acid metabolic process	5.356e-15	4.718e-12	163	1085
Cluster2	GO:0006082	organic acid metabolic process	1.403e-14	1.133e-11	165	1115
Cluster2	GO:0043436	oxoacid metabolic process	1.807e-14	1.347e-11	164	1109
Cluster2	GO:0072329	monocarboxylic acid catabolic process	2.321e-14	1.607e-11	44	150
Cluster2	GO:0019395	fatty acid oxidation	7.521e-14	4.859e-11	39	125
Cluster2	GO:0044282	small molecule catabolic process	1.217e-13	7.373e-11	83	433
Cluster2	GO:0034440	lipid oxidation	5.323e-13	3.034e-10	39	132
Cluster2	GO:1901565	organonitrogen compound catabolic process	1.982e-12	1.067e-09	205	1566
Cluster2	GO:0045184	establishment of protein localization	6.802e-12	3.469e-09	246	1998
Cluster2	GO:0030258	lipid modification	3.618e-11	1.753e-08	50	224
Cluster2	GO:0009896	positive regulation of catabolic process	7.277e-11	3.358e-08	103	659
Cluster2	GO:0015031	protein transport	1.013e-10	4.46e-08	228	1867
Cluster2	GO:0030163	protein catabolic process	2.256e-10	9.505e-08	157	1175
Cluster2	GO:0009057	macromolecule catabolic process	3.811e-10	1.539e-07	203	1639
Cluster2	GO:0009894	regulation of catabolic process	4.516e-10	1.75e-07	161	1225
Cluster2	GO:0060341	regulation of cellular localization	1.12e-09	4.172e-07	162	1250
Cluster2	GO:0006631	fatty acid metabolic process	2.272e-09	8.155e-07	77	470
Cluster2	GO:0033365	protein localization to organelle	3.817e-09	1.321e-06	143	1085
Cluster2	GO:0046907	intracellular transport	5.877e-09	1.964e-06	217	1838
Cluster2	GO:0019637	organophosphate metabolic process	6.466e-09	2.089e-06	142	1084
Cluster2	GO:0009967	positive regulation of signal transduction	1.05e-08	3.281e-06	220	1882
Cluster2	GO:0016192	vesicle-mediated transport	1.168e-08	3.536e-06	214	1822
Cluster2	GO:0032606	type I interferon production	1.838e-08	5.396e-06	33	140
Cluster2	GO:0006869	lipid transport	2.035e-08	5.801e-06	80	520
Cluster2	GO:0048666	neuron development	2.205e-08	6.105e-06	200	1691
Cluster2	GO:0010876	lipid localization	2.473e-08	6.657e-06	86	576
Cluster2	GO:0032880	regulation of protein localization	3.303e-08	8.651e-06	143	1122
Cluster2	GO:0031331	positive regulation of cellular catabolic process	5.077e-08	1.295e-05	68	425
Cluster2	GO:0051056	regulation of small GTPase mediated signal transduction	5.301e-08	1.317e-05	57	332
Cluster2	GO:0034121	regulation of toll-like receptor signaling pathway	7.309e-08	1.771e-05	16	42
Cluster2	GO:0046486	glycerolipid metabolic process	8.82e-08	2.085e-05	68	431
Cluster2	GO:0032479	regulation of type I interferon production	1.115e-07	2.572e-05	31	136
Cluster2	GO:0015711	organic anion transport	1.258e-07	2.835e-05	76	506
Cluster2	GO:0051603	proteolysis involved in protein catabolic process	1.332e-07	2.934e-05	115	872
Cluster2	GO:0032481	positive regulation of type I interferon production	1.929e-07	4.154e-05	22	79
Cluster2	GO:0046942	carboxylic acid transport	2.029e-07	4.274e-05	65	414
Cluster2	GO:0015849	organic acid transport	2.426e-07	5.001e-05	65	416
Cluster2	GO:0042325	regulation of phosphorylation	2.719e-07	5.488e-05	168	1416
Cluster2	GO:0009725	response to hormone	2.81e-07	5.557e-05	136	1092
Cluster2	GO:0072659	protein localization to plasma membrane	2.881e-07	5.584e-05	56	340
Cluster2	GO:0006641	triglyceride metabolic process	3.249e-07	6.172e-05	29	128
Cluster2	GO:0007034	vacuolar transport	3.326e-07	6.198e-05	37	187
Cluster2	GO:0002831	regulation of response to biotic stimulus	5.556e-07	0.0001016	87	627
Cluster2	GO:0019941	modification-dependent protein catabolic process	5.84e-07	0.0001048	101	761
Cluster2	GO:0006511	ubiquitin-dependent protein catabolic process	6.07e-07	0.0001055	100	752
Cluster2	GO:0050994	regulation of lipid catabolic process	6.194e-07	0.0001055	22	84
Cluster2	GO:0007264	small GTPase mediated signal transduction	6.205e-07	0.0001055	79	554
Cluster2	GO:0008610	lipid biosynthetic process	6.361e-07	0.0001063	109	840
Cluster2	GO:0043632	modification-dependent macromolecule catabolic process	6.742e-07	0.0001107	102	773
Cluster2	GO:1901615	organic hydroxy compound metabolic process	7.124e-07	0.000115	90	659
Cluster2	GO:0072666	establishment of protein localization to vacuole	7.419e-07	0.0001172	19	66
Cluster2	GO:0000902	cell morphogenesis	7.502e-07	0.0001172	160	1356
Cluster2	GO:0072665	protein localization to vacuole	7.721e-07	0.0001188	22	85
Cluster2	GO:0006623	protein targeting to vacuole	8.502e-07	0.0001287	16	49
Cluster2	GO:0031329	regulation of cellular catabolic process	9.025e-07	0.0001345	105	807
Cluster2	GO:0051650	establishment of vesicle localization	1.091e-06	0.0001565	43	244
Cluster2	GO:0007265	Ras protein signal transduction	1.096e-06	0.0001565	61	398
Cluster2	GO:1903829	positive regulation of protein localization	1.098e-06	0.0001565	82	590
Cluster2	GO:0031399	regulation of protein modification process	1.154e-06	0.0001599	200	1785
Cluster2	GO:0009968	negative regulation of signal transduction	1.155e-06	0.0001599	184	1616
Cluster2	GO:0043085	positive regulation of catalytic activity	1.258e-06	0.0001717	155	1316
Cluster2	GO:0007041	lysosomal transport	1.281e-06	0.0001724	31	151
Cluster2	GO:0019220	regulation of phosphate metabolic process	1.306e-06	0.0001733	182	1598
Cluster2	GO:0051174	regulation of phosphorus metabolic process	1.359e-06	0.000178	182	1599
Cluster2	GO:0023057	negative regulation of signaling	1.411e-06	0.0001823	198	1769
Cluster2	GO:0005975	carbohydrate metabolic process	1.459e-06	0.000186	88	651
Cluster2	GO:0009410	response to xenobiotic stimulus	1.562e-06	0.0001966	79	567
Cluster2	GO:0015909	long-chain fatty acid transport	1.831e-06	0.0002274	20	76
Cluster2	GO:0007167	enzyme-linked receptor protein signaling pathway	1.866e-06	0.0002289	149	1263
Cluster2	GO:0002218	activation of innate immune response	1.908e-06	0.0002311	48	291
Cluster2	GO:0045088	regulation of innate immune response	2.134e-06	0.000255	71	497
Cluster2	GO:0014070	response to organic cyclic compound	2.158e-06	0.000255	136	1133
Cluster2	GO:0015718	monocarboxylic acid transport	2.321e-06	0.0002704	39	218
Cluster2	GO:0010648	negative regulation of cell communication	2.367e-06	0.0002704	197	1772
Cluster2	GO:0080134	regulation of response to stress	2.42e-06	0.0002704	205	1858
Cluster2	GO:0031998	regulation of fatty acid beta-oxidation	2.424e-06	0.0002704	11	26
Cluster2	GO:0006468	protein phosphorylation	2.428e-06	0.0002704	199	1794
Cluster2	GO:0000038	very long-chain fatty acid metabolic process	2.509e-06	0.0002762	13	36
Cluster2	GO:0051648	vesicle localization	2.976e-06	0.0003241	45	270
Cluster2	GO:0002224	toll-like receptor signaling pathway	3.087e-06	0.0003323	21	85
Cluster2	GO:0019216	regulation of lipid metabolic process	3.237e-06	0.0003447	68	475
Cluster2	GO:0051130	positive regulation of cellular component organization	3.289e-06	0.0003464	162	1411
Cluster2	GO:0045089	positive regulation of innate immune response	3.472e-06	0.0003617	58	385
Cluster2	GO:0071495	cellular response to endogenous stimulus	3.511e-06	0.0003619	206	1879
Cluster2	GO:0031175	neuron projection development	3.652e-06	0.0003661	163	1424
Cluster2	GO:0046578	regulation of Ras protein signal transduction	3.668e-06	0.0003661	39	222
Cluster2	GO:0006457	protein folding	3.739e-06	0.0003661	42	247
Cluster2	GO:1990778	protein localization to cell periphery	3.74e-06	0.0003661	62	422
Cluster2	GO:0006855	xenobiotic transmembrane transport	3.74e-06	0.0003661	9	18
Cluster2	GO:0031346	positive regulation of cell projection organization	3.795e-06	0.0003677	71	505
Cluster2	GO:0048545	response to steroid hormone	4.092e-06	0.0003926	59	396
Cluster2	GO:0062207	regulation of pattern recognition receptor signaling pathway	4.166e-06	0.0003957	29	144
Cluster2	GO:0044087	regulation of cellular component biogenesis	4.297e-06	0.0004016	140	1189
Cluster2	GO:0051668	localization within membrane	4.31e-06	0.0004016	104	825
Cluster2	GO:0006644	phospholipid metabolic process	4.399e-06	0.000406	61	415
Cluster2	GO:0061077	chaperone-mediated protein folding	4.896e-06	0.0004435	19	74
Cluster2	GO:0072594	establishment of protein localization to organelle	4.898e-06	0.0004435	72	518
Cluster2	GO:0061919	process utilizing autophagic mechanism	5.032e-06	0.0004474	85	642
Cluster2	GO:0006914	autophagy	5.032e-06	0.0004474	85	642
Cluster2	GO:0016567	protein ubiquitination	5.108e-06	0.00045	107	858
Cluster2	GO:0002833	positive regulation of response to biotic stimulus	5.551e-06	0.0004846	61	418
Cluster2	GO:0015748	organophosphate ester transport	5.994e-06	0.0005186	31	162
Cluster2	GO:0002221	pattern recognition receptor signaling pathway	6.561e-06	0.0005626	41	244
Cluster2	GO:0006639	acylglycerol metabolic process	6.641e-06	0.0005645	30	155
Cluster2	GO:0051050	positive regulation of transport	6.966e-06	0.000587	140	1200
Cluster2	GO:0007010	cytoskeleton organization	7.027e-06	0.000587	193	1759
Cluster2	GO:0042060	wound healing	7.406e-06	0.0006134	74	543
Cluster2	GO:0006458	'de novo' protein folding	7.79e-06	0.0006397	14	45
Cluster2	GO:0055092	sterol homeostasis	8.124e-06	0.0006615	26	126
Cluster2	GO:0006638	neutral lipid metabolic process	8.668e-06	0.0006999	30	157
Cluster2	GO:0009611	response to wounding	9.261e-06	0.0007416	96	760
Cluster2	GO:0035295	tube development	9.37e-06	0.0007442	202	1864
Cluster2	GO:0050996	positive regulation of lipid catabolic process	9.599e-06	0.0007562	13	40
Cluster2	GO:0051338	regulation of transferase activity	9.701e-06	0.0007581	120	1002
Cluster2	GO:0002758	innate immune response-activating signaling pathway	9.791e-06	0.000759	43	265
Cluster2	GO:0015918	sterol transport	9.88e-06	0.0007598	30	158
Cluster2	GO:0009636	response to toxic substance	1.03e-05	0.0007859	48	309
Cluster2	GO:0048598	embryonic morphogenesis	1.057e-05	0.0008004	138	1189
Cluster2	GO:0001932	regulation of protein phosphorylation	1.142e-05	0.0008575	148	1295
Cluster2	GO:0048878	chemical homeostasis	1.216e-05	0.0009067	151	1328
Cluster2	GO:1902533	positive regulation of intracellular signal transduction	1.232e-05	0.0009115	139	1203
Cluster2	GO:0032727	positive regulation of interferon-alpha production	1.264e-05	0.0009254	11	30
Cluster2	GO:0033540	fatty acid beta-oxidation using acyl-CoA oxidase	1.27e-05	0.0009254	7	12
Cluster2	GO:0051084	'de novo' post-translational protein folding	1.301e-05	0.0009411	13	41
Cluster2	GO:0007173	epidermal growth factor receptor signaling pathway	1.391e-05	0.0009985	28	145
Cluster2	GO:0032608	interferon-beta production	1.583e-05	0.00112	18	73
Cluster2	GO:0032648	regulation of interferon-beta production	1.583e-05	0.00112	18	73
Cluster2	GO:0055088	lipid homeostasis	1.601e-05	0.001124	37	219
Cluster2	GO:0032446	protein modification by small protein conjugation	1.644e-05	0.001146	113	942
Cluster2	GO:0150104	transport across blood-brain barrier	1.679e-05	0.001162	20	87
Cluster2	GO:0072657	protein localization to membrane	1.822e-05	0.001252	92	733
Cluster2	GO:0035966	response to topologically incorrect protein	1.858e-05	0.001263	31	171
Cluster2	GO:0034976	response to endoplasmic reticulum stress	1.864e-05	0.001263	47	307
Cluster2	GO:0045834	positive regulation of lipid metabolic process	1.916e-05	0.00129	35	204
Cluster2	GO:0042760	very long-chain fatty acid catabolic process	1.934e-05	0.001292	6	9
Cluster2	GO:0043254	regulation of protein-containing complex assembly	1.96e-05	0.001301	68	501
Cluster2	GO:0010232	vascular transport	2.009e-05	0.001324	20	88
Cluster2	GO:0022603	regulation of anatomical structure morphogenesis	2.075e-05	0.001349	142	1247
Cluster2	GO:0002682	regulation of immune system process	2.081e-05	0.001349	195	1812
Cluster2	GO:0030036	actin cytoskeleton organization	2.088e-05	0.001349	106	876
Cluster2	GO:0042632	cholesterol homeostasis	2.118e-05	0.001354	25	125
Cluster2	GO:0033043	regulation of organelle organization	2.123e-05	0.001354	156	1395
Cluster2	GO:0070647	protein modification by small protein conjugation or removal	2.276e-05	0.001442	127	1093
Cluster2	GO:0032728	positive regulation of interferon-beta production	2.314e-05	0.001456	14	49
Cluster2	GO:0009791	post-embryonic development	2.35e-05	0.001469	28	149
Cluster2	GO:0000209	protein polyubiquitination	2.528e-05	0.00157	44	284
Cluster2	GO:0070848	response to growth factor	2.636e-05	0.001627	112	942
Cluster2	GO:0061462	protein localization to lysosome	2.783e-05	0.001707	15	56
Cluster2	GO:0051222	positive regulation of protein transport	2.854e-05	0.00174	56	394
Cluster2	GO:0070507	regulation of microtubule cytoskeleton organization	2.907e-05	0.00176	32	183
Cluster2	GO:0051493	regulation of cytoskeleton organization	3.169e-05	0.001907	79	615
Cluster2	GO:0015908	fatty acid transport	3.333e-05	0.001993	26	136
Cluster2	GO:0030301	cholesterol transport	3.399e-05	0.002008	27	144
Cluster2	GO:0030705	cytoskeleton-dependent intracellular transport	3.399e-05	0.002008	38	235
Cluster2	GO:0045017	glycerolipid biosynthetic process	3.47e-05	0.002038	42	270
Cluster2	GO:0006622	protein targeting to lysosome	3.564e-05	0.00208	11	33
Cluster2	GO:0038127	ERBB signaling pathway	3.854e-05	0.002235	29	161
Cluster2	GO:0016236	macroautophagy	3.875e-05	0.002235	50	343
Cluster2	GO:0062012	regulation of small molecule metabolic process	3.989e-05	0.002287	62	455
Cluster2	GO:0002253	activation of immune response	4.105e-05	0.00234	77	600
Cluster2	GO:0010975	regulation of neuron projection development	4.296e-05	0.002434	82	650
Cluster2	GO:0007266	Rho protein signal transduction	4.336e-05	0.002443	29	162
Cluster2	GO:0001667	ameboidal-type cell migration	4.393e-05	0.002457	89	720
Cluster2	GO:0043067	regulation of programmed cell death	4.419e-05	0.002457	210	1999
Cluster2	GO:0050778	positive regulation of immune response	4.438e-05	0.002457	100	831
Cluster2	GO:0035973	aggrephagy	4.501e-05	0.002478	6	10
Cluster2	GO:1904951	positive regulation of establishment of protein localization	4.586e-05	0.0025	57	410
Cluster2	GO:0030029	actin filament-based process	4.597e-05	0.0025	114	975
Cluster2	GO:0003013	circulatory system process	4.618e-05	0.0025	101	842
Cluster2	GO:0030522	intracellular receptor signaling pathway	4.656e-05	0.002507	53	373
Cluster2	GO:0009437	carnitine metabolic process	4.756e-05	0.002544	7	14
Cluster2	GO:0046434	organophosphate catabolic process	4.778e-05	0.002544	30	171
Cluster2	GO:0019432	triglyceride biosynthetic process	4.811e-05	0.002547	14	52
Cluster2	GO:0000041	transition metal ion transport	5.139e-05	0.002706	23	116
Cluster2	GO:0032607	interferon-alpha production	5.185e-05	0.002716	12	40
Cluster2	GO:0006979	response to oxidative stress	5.229e-05	0.002724	70	536
Cluster2	GO:0046460	neutral lipid biosynthetic process	5.416e-05	0.002792	15	59
Cluster2	GO:0046463	acylglycerol biosynthetic process	5.416e-05	0.002792	15	59
Cluster2	GO:0032386	regulation of intracellular transport	5.478e-05	0.002807	58	422
Cluster2	GO:0021954	central nervous system neuron development	5.503e-05	0.002807	25	132
Cluster2	GO:0044093	positive regulation of molecular function	5.565e-05	0.002822	190	1788
Cluster2	GO:0006986	response to unfolded protein	5.591e-05	0.002822	27	148
Cluster2	GO:0051247	positive regulation of protein metabolic process	5.727e-05	0.002875	182	1702
Cluster2	GO:0043087	regulation of GTPase activity	5.857e-05	0.002926	58	423
Cluster2	GO:0006892	post-Golgi vesicle-mediated transport	5.911e-05	0.002937	23	117
Cluster2	GO:0031396	regulation of protein ubiquitination	6.098e-05	0.003015	39	250
Cluster2	GO:0006577	amino-acid betaine metabolic process	6.254e-05	0.003076	8	19
Cluster2	GO:0006109	regulation of carbohydrate metabolic process	6.527e-05	0.003194	38	242
Cluster2	GO:0051085	chaperone cofactor-dependent protein refolding	6.602e-05	0.003215	11	35
Cluster2	GO:0044089	positive regulation of cellular component biogenesis	7.026e-05	0.003388	75	590
Cluster2	GO:0099518	vesicle cytoskeletal trafficking	7.04e-05	0.003388	18	81
Cluster2	GO:0002064	epithelial cell development	7.063e-05	0.003388	50	351
Cluster2	GO:0003279	cardiac septum development	7.113e-05	0.003395	25	134
Cluster2	GO:1901698	response to nitrogen compound	7.152e-05	0.003397	154	1407
Cluster2	GO:0120035	regulation of plasma membrane bounded cell projection organization	7.366e-05	0.003482	108	924
Cluster2	GO:0048589	developmental growth	7.467e-05	0.003513	127	1122
Cluster2	GO:0051223	regulation of protein transport	7.686e-05	0.003598	85	691
Cluster2	GO:0050776	regulation of immune response	7.851e-05	0.003658	120	1050
Cluster2	GO:0043549	regulation of kinase activity	8.016e-05	0.003716	101	854
Cluster2	GO:0070424	regulation of nucleotide-binding oligomerization domain containing signaling pathway	8.292e-05	0.003826	7	15
Cluster2	GO:0031334	positive regulation of protein-containing complex assembly	8.365e-05	0.003842	37	236
Cluster2	GO:0062013	positive regulation of small molecule metabolic process	8.43e-05	0.003853	32	193
Cluster2	GO:0007369	gastrulation	8.971e-05	0.004081	57	420
Cluster2	GO:0070212	protein poly-ADP-ribosylation	9.219e-05	0.004174	6	11
Cluster2	GO:0010976	positive regulation of neuron projection development	9.444e-05	0.004256	39	255
Cluster2	GO:0061024	membrane organization	9.654e-05	0.004331	110	951
Cluster2	GO:0030155	regulation of cell adhesion	9.755e-05	0.004356	112	972
Cluster2	GO:0042981	regulation of apoptotic process	0.0001016	0.004499	202	1939
Cluster2	GO:0071383	cellular response to steroid hormone stimulus	0.0001017	0.004499	38	247
Cluster2	GO:0034612	response to tumor necrosis factor	0.0001036	0.004563	43	292
Cluster2	GO:0010256	endomembrane system organization	0.0001041	0.004566	83	677
Cluster2	GO:0042063	gliogenesis	0.000111	0.004827	66	510
Cluster2	GO:0043069	negative regulation of programmed cell death	0.0001116	0.004827	135	1217
Cluster2	GO:1903320	regulation of protein modification by small protein conjugation or removal	0.0001121	0.004827	43	293
Cluster2	GO:0010498	proteasomal protein catabolic process	0.0001123	0.004827	72	569
Cluster2	GO:0046777	protein autophosphorylation	0.0001126	0.004827	40	266
Cluster2	GO:0032647	regulation of interferon-alpha production	0.0001163	0.004945	11	37
Cluster2	GO:0071363	cellular response to growth factor stimulus	0.0001164	0.004945	106	914
Cluster2	GO:0033344	cholesterol efflux	0.0001208	0.00511	17	77
Cluster2	GO:0015914	phospholipid transport	0.0001247	0.005255	21	107
Cluster2	GO:0070201	regulation of establishment of protein localization	0.0001308	0.005487	87	722
Cluster2	GO:0010001	glial cell differentiation	0.000132	0.005511	53	388
Cluster2	GO:0045906	negative regulation of vasoconstriction	0.0001371	0.005701	7	16
Cluster2	GO:0032870	cellular response to hormone stimulus	0.0001406	0.005821	90	754
Cluster2	GO:0046503	glycerolipid catabolic process	0.0001469	0.006058	16	71
Cluster2	GO:0072359	circulatory system development	0.0001478	0.006067	204	1974
Cluster2	GO:0048858	cell projection morphogenesis	0.0001494	0.006102	111	972
Cluster2	GO:0040007	growth	0.0001499	0.006102	157	1461
Cluster2	GO:0031344	regulation of cell projection organization	0.000151	0.006123	108	941
Cluster2	GO:0032989	cellular anatomical entity morphogenesis	0.0001533	0.006188	129	1162
Cluster2	GO:0006897	endocytosis	0.0001591	0.006398	102	880
Cluster2	GO:0032489	regulation of Cdc42 protein signal transduction	0.0001601	0.00641	5	8
Cluster2	GO:0055085	transmembrane transport	0.0001665	0.006638	187	1791
Cluster2	GO:0031349	positive regulation of defense response	0.0001716	0.00679	71	567
Cluster2	GO:0006686	sphingomyelin biosynthetic process	0.0001717	0.00679	6	12
Cluster2	GO:0048812	neuron projection morphogenesis	0.0001778	0.007002	108	945
Cluster2	GO:1902903	regulation of supramolecular fiber organization	0.0001839	0.007161	58	441
Cluster2	GO:0034122	negative regulation of toll-like receptor signaling pathway	0.000184	0.007161	9	27
Cluster2	GO:0070423	nucleotide-binding oligomerization domain containing signaling pathway	0.000184	0.007161	9	27
Cluster2	GO:0043066	negative regulation of apoptotic process	0.0001865	0.007229	130	1178
Cluster2	GO:0016032	viral process	0.0002044	0.007889	65	511
Cluster2	GO:0044091	membrane biogenesis	0.0002072	0.007968	16	73
Cluster2	GO:0007163	establishment or maintenance of cell polarity	0.0002117	0.008107	41	283
Cluster2	GO:0031401	positive regulation of protein modification process	0.0002146	0.008164	127	1150
Cluster2	GO:0006790	sulfur compound metabolic process	0.0002148	0.008164	50	367
Cluster2	GO:0060385	axonogenesis involved in innervation	0.0002167	0.008171	7	17
Cluster2	GO:0032488	Cdc42 protein signal transduction	0.0002167	0.008171	7	17
Cluster2	GO:0032103	positive regulation of response to external stimulus	0.0002183	0.008198	87	733
Cluster2	GO:0051347	positive regulation of transferase activity	0.0002222	0.008313	77	632
Cluster2	GO:0030307	positive regulation of cell growth	0.0002296	0.008557	34	221
Cluster2	GO:0008654	phospholipid biosynthetic process	0.0002309	0.008572	40	275
Cluster2	GO:0016358	dendrite development	0.000234	0.008631	47	340
Cluster2	GO:0048639	positive regulation of developmental growth	0.0002343	0.008631	37	248
Cluster2	GO:0007249	canonical NF-kappaB signal transduction	0.00024	0.008782	46	331
Cluster2	GO:0120039	plasma membrane bounded cell projection morphogenesis	0.0002402	0.008782	109	963
Cluster2	GO:0006066	alcohol metabolic process	0.0002433	0.008836	57	436
Cluster2	GO:0045927	positive regulation of growth	0.0002436	0.008836	48	350
Cluster2	GO:0015850	organic hydroxy compound transport	0.0002444	0.008836	52	388
Cluster2	GO:0009755	hormone-mediated signaling pathway	0.0002504	0.009001	34	222
Cluster2	GO:1900151	regulation of nuclear-transcribed mRNA catabolic process, deadenylation-dependent decay	0.0002517	0.009001	9	28
Cluster2	GO:0035872	nucleotide-binding domain, leucine rich repeat containing receptor signaling pathway	0.0002517	0.009001	9	28
Cluster2	GO:1901135	carbohydrate derivative metabolic process	0.0002627	0.009359	132	1209
Cluster2	GO:0040008	regulation of growth	0.000264	0.009369	99	861
Cluster2	GO:0051707	response to other organism	0.0002674	0.009458	200	1951
Cluster2	GO:0022604	regulation of cell morphogenesis	0.0002699	0.009509	44	314
Cluster2	GO:0048638	regulation of developmental growth	0.0002739	0.009616	61	477
Cluster2	GO:1905039	carboxylic acid transmembrane transport	0.0002812	0.009837	28	171
Cluster2	GO:0043547	positive regulation of GTPase activity	0.0002896	0.01009	44	315
Cluster2	GO:0046328	regulation of JNK cascade	0.000293	0.01018	29	180
Cluster2	GO:0046113	nucleobase catabolic process	0.0002969	0.01024	6	13
Cluster2	GO:0032000	positive regulation of fatty acid beta-oxidation	0.0002969	0.01024	6	13
Cluster2	GO:0043207	response to external biotic stimulus	0.0002983	0.01025	200	1955
Cluster2	GO:0045087	innate immune response	0.0003062	0.01048	124	1128
Cluster2	GO:0002684	positive regulation of immune system process	0.0003075	0.01049	134	1235
Cluster2	GO:1903825	organic acid transmembrane transport	0.0003104	0.01052	28	172
Cluster2	GO:0060191	regulation of lipase activity	0.0003104	0.01052	20	106
Cluster2	GO:0034097	response to cytokine	0.0003133	0.01058	123	1118
Cluster2	GO:0097242	amyloid-beta clearance	0.0003175	0.01068	11	41
Cluster2	GO:0000165	MAPK cascade	0.0003209	0.01074	110	981
Cluster2	GO:0051402	neuron apoptotic process	0.0003215	0.01074	53	402
Cluster2	GO:1903689	regulation of wound healing, spreading of epidermal cells	0.000336	0.01119	5	9
Cluster2	GO:0006081	cellular aldehyde metabolic process	0.0003654	0.01204	17	84
Cluster2	GO:0042908	xenobiotic transport	0.0003666	0.01204	14	62
Cluster2	GO:0045773	positive regulation of axon extension	0.0003666	0.01204	14	62
Cluster2	GO:0140374	antiviral innate immune response	0.0003667	0.01204	13	55
Cluster2	GO:0006470	protein dephosphorylation	0.0003684	0.01206	39	272
Cluster2	GO:0010243	response to organonitrogen compound	0.0003711	0.01211	141	1316
Cluster2	GO:0007254	JNK cascade	0.0003801	0.01236	33	218
Cluster2	GO:0009607	response to biotic stimulus	0.0003866	0.01252	203	1998
Cluster2	GO:0099536	synaptic signaling	0.0003876	0.01252	110	986
Cluster2	GO:0008202	steroid metabolic process	0.0003922	0.01263	51	386
Cluster2	GO:0042327	positive regulation of phosphorylation	0.0003977	0.01276	105	934
Cluster2	GO:0007169	transmembrane receptor protein tyrosine kinase signaling pathway	0.0003999	0.01279	91	788
Cluster2	GO:0042180	cellular ketone metabolic process	0.0004109	0.0131	41	292
Cluster2	GO:0048592	eye morphogenesis	0.000417	0.01325	51	387
Cluster2	GO:1902001	fatty acid transmembrane transport	0.0004211	0.01334	8	24
Cluster2	GO:0051345	positive regulation of hydrolase activity	0.0004255	0.01342	79	666
Cluster2	GO:0098754	detoxification	0.0004266	0.01342	29	184
Cluster2	GO:0002753	cytoplasmic pattern recognition receptor signaling pathway	0.0004308	0.01351	23	133
Cluster2	GO:0009395	phospholipid catabolic process	0.0004366	0.01362	14	63
Cluster2	GO:0006650	glycerophospholipid metabolic process	0.0004373	0.01362	44	321
Cluster2	GO:0007033	vacuole organization	0.0004446	0.01381	36	247
Cluster2	GO:0034377	plasma lipoprotein particle assembly	0.0004495	0.01391	9	30
Cluster2	GO:0072521	purine-containing compound metabolic process	0.0004744	0.01464	70	577
Cluster2	GO:0090209	negative regulation of triglyceride metabolic process	0.0004857	0.01494	7	19
Cluster2	GO:0099537	trans-synaptic signaling	0.0004893	0.01501	106	950
Cluster2	GO:0006997	nucleus organization	0.0004999	0.01525	28	177
Cluster2	GO:0007017	microtubule-based process	0.0005005	0.01525	121	1110
Cluster2	GO:0007623	circadian rhythm	0.0005036	0.0153	38	267
Cluster2	GO:0071466	cellular response to xenobiotic stimulus	0.0005117	0.01549	37	258
Cluster2	GO:1901361	organic cyclic compound catabolic process	0.0005151	0.01555	78	660
Cluster2	GO:0006998	nuclear envelope organization	0.0005176	0.01558	14	64
Cluster2	GO:1902905	positive regulation of supramolecular fiber organization	0.0005259	0.01573	31	204
Cluster2	GO:0008206	bile acid metabolic process	0.0005311	0.01573	13	57
Cluster2	GO:0080135	regulation of cellular response to stress	0.0005315	0.01573	98	868
Cluster2	GO:0048667	cell morphogenesis involved in neuron differentiation	0.0005317	0.01573	100	889
Cluster2	GO:0051384	response to glucocorticoid	0.000533	0.01573	27	169
Cluster2	GO:0071407	cellular response to organic cyclic compound	0.000533	0.01573	79	671
Cluster2	GO:0045893	positive regulation of DNA-templated transcription	0.0005342	0.01573	193	1899
Cluster2	GO:0051094	positive regulation of developmental process	0.0005369	0.01577	180	1755
Cluster2	GO:0034504	protein localization to nucleus	0.0005409	0.01584	49	372
Cluster2	GO:0048880	sensory system development	0.0005498	0.01605	104	932
Cluster2	GO:1901185	negative regulation of ERBB signaling pathway	0.0005542	0.0161	10	37
Cluster2	GO:0098916	anterograde trans-synaptic signaling	0.0005589	0.0161	105	943
Cluster2	GO:0007268	chemical synaptic transmission	0.0005589	0.0161	105	943
Cluster2	GO:0042445	hormone metabolic process	0.0005668	0.0161	42	306
Cluster2	GO:0030010	establishment of cell polarity	0.0005676	0.0161	30	196
Cluster2	GO:0090407	organophosphate biosynthetic process	0.0005694	0.0161	77	652
Cluster2	GO:2000026	regulation of multicellular organismal development	0.0005699	0.0161	197	1946
Cluster2	GO:0006642	triglyceride mobilization	0.0005703	0.0161	4	6
Cluster2	GO:0071211	protein targeting to vacuole involved in autophagy	0.0005703	0.0161	4	6
Cluster2	GO:0051599	response to hydrostatic pressure	0.0005703	0.0161	4	6
Cluster2	GO:0031398	positive regulation of protein ubiquitination	0.0005704	0.0161	24	144
Cluster2	GO:0010631	epithelial cell migration	0.0005803	0.0161	59	471
Cluster2	GO:0006091	generation of precursor metabolites and energy	0.0005865	0.0161	64	521
Cluster2	GO:0019859	thymine metabolic process	0.0005876	0.0161	3	3
Cluster2	GO:0061847	response to cholecystokinin	0.0005876	0.0161	3	3
Cluster2	GO:0061740	protein targeting to lysosome involved in chaperone-mediated autophagy	0.0005876	0.0161	3	3
Cluster2	GO:0071464	cellular response to hydrostatic pressure	0.0005876	0.0161	3	3
Cluster2	GO:1905335	regulation of aggrephagy	0.0005876	0.0161	3	3
Cluster2	GO:1905337	positive regulation of aggrephagy	0.0005876	0.0161	3	3
Cluster2	GO:0006210	thymine catabolic process	0.0005876	0.0161	3	3
Cluster2	GO:1904694	negative regulation of vascular associated smooth muscle contraction	0.0005876	0.0161	3	3
Cluster2	GO:0036010	protein localization to endosome	0.0005881	0.0161	9	31
Cluster2	GO:0032101	regulation of response to external stimulus	0.0005928	0.01616	147	1396
Cluster2	GO:0044283	small molecule biosynthetic process	0.0005938	0.01616	81	694
Cluster2	GO:0031347	regulation of defense response	0.0005962	0.01618	112	1019
Cluster2	GO:0002011	morphogenesis of an epithelial sheet	0.0006005	0.01625	28	179
Cluster2	GO:0046903	secretion	0.000602	0.01625	136	1277
Cluster2	GO:0051216	cartilage development	0.0006106	0.0164	49	374
Cluster2	GO:0031113	regulation of microtubule polymerization	0.0006111	0.0164	14	65
Cluster2	GO:0031112	positive regulation of microtubule polymerization or depolymerization	0.0006147	0.01645	11	44
Cluster2	GO:1902680	positive regulation of RNA biosynthetic process	0.0006252	0.01669	193	1905
Cluster2	GO:0007015	actin filament organization	0.0006485	0.01726	64	523
Cluster2	GO:0008088	axo-dendritic transport	0.0006565	0.01743	18	96
Cluster2	GO:0019058	viral life cycle	0.0006601	0.01748	50	385
Cluster2	GO:0032388	positive regulation of intracellular transport	0.0006673	0.01762	34	234
Cluster2	GO:1902904	negative regulation of supramolecular fiber organization	0.0006736	0.01774	30	198
Cluster2	GO:0018193	peptidyl-amino acid modification	0.000676	0.01775	134	1259
Cluster2	GO:0006605	protein targeting	0.0006802	0.01781	52	405
Cluster2	GO:0006491	N-glycan processing	0.0006951	0.01816	7	20
Cluster2	GO:0006805	xenobiotic metabolic process	0.0006991	0.01821	24	146
Cluster2	GO:0043408	regulation of MAPK cascade	0.0007098	0.01844	97	865
Cluster2	GO:0060840	artery development	0.0007293	0.01886	25	155
Cluster2	GO:0090092	regulation of transmembrane receptor protein serine/threonine kinase signaling pathway	0.00073	0.01886	49	377
Cluster2	GO:0048844	artery morphogenesis	0.0007441	0.01917	19	105
Cluster2	GO:0014743	regulation of muscle hypertrophy	0.000746	0.01917	18	97
Cluster2	GO:0051791	medium-chain fatty acid metabolic process	0.0007512	0.01921	6	15
Cluster2	GO:0033700	phospholipid efflux	0.0007512	0.01921	6	15
Cluster2	GO:0090207	regulation of triglyceride metabolic process	0.0007539	0.01922	13	59
Cluster2	GO:0042059	negative regulation of epidermal growth factor receptor signaling pathway	0.0007598	0.01932	9	32
Cluster2	GO:0072337	modified amino acid transport	0.0007692	0.01941	12	52
Cluster2	GO:0008631	intrinsic apoptotic signaling pathway in response to oxidative stress	0.0007692	0.01941	12	52
Cluster2	GO:0071827	plasma lipoprotein particle organization	0.0007692	0.01941	12	52
Cluster2	GO:0042026	protein refolding	0.0007725	0.01944	8	26
Cluster2	GO:0045732	positive regulation of protein catabolic process	0.0007777	0.01952	34	236
Cluster2	GO:0140352	export from cell	0.0007905	0.01979	128	1199
Cluster2	GO:0090132	epithelium migration	0.000795	0.01982	59	477
Cluster2	GO:0090130	tissue migration	0.0007958	0.01982	60	487
Cluster2	GO:0048588	developmental cell growth	0.0008074	0.02004	48	369
Cluster2	GO:0043122	regulation of canonical NF-kappaB signal transduction	0.0008088	0.02004	39	283
Cluster2	GO:0042326	negative regulation of phosphorylation	0.0008336	0.02061	57	458
Cluster2	GO:0007032	endosome organization	0.0008389	0.02066	19	106
Cluster2	GO:0060411	cardiac septum morphogenesis	0.00084	0.02066	17	90
Cluster2	GO:0032956	regulation of actin cytoskeleton organization	0.0008523	0.02091	52	409
Cluster2	GO:0033993	response to lipid	0.0008596	0.02103	126	1180
Cluster2	GO:0016482	cytosolic transport	0.0008652	0.02107	30	201
Cluster2	GO:0097190	apoptotic signaling pathway	0.0008655	0.02107	84	734
Cluster2	GO:0031116	positive regulation of microtubule polymerization	0.000871	0.02115	10	39
Cluster2	GO:0010562	positive regulation of phosphorus metabolic process	0.0008755	0.02116	112	1030
Cluster2	GO:0045937	positive regulation of phosphate metabolic process	0.0008755	0.02116	112	1030
Cluster2	GO:0010817	regulation of hormone levels	0.0008797	0.02121	83	724
Cluster2	GO:0009991	response to extracellular stimulus	0.0008889	0.02137	73	621
Cluster2	GO:0043255	regulation of carbohydrate biosynthetic process	0.0009012	0.02153	23	140
Cluster2	GO:0061951	establishment of protein localization to plasma membrane	0.0009023	0.02153	15	75
Cluster2	GO:0006879	intracellular iron ion homeostasis	0.0009023	0.02153	15	75
Cluster2	GO:0045471	response to ethanol	0.0009058	0.02157	26	166
Cluster2	GO:0060429	epithelium development	0.0009097	0.02161	200	1998
Cluster2	GO:1903844	regulation of cellular response to transforming growth factor beta stimulus	0.0009224	0.02185	27	175
Cluster2	GO:0019725	cellular homeostasis	0.000928	0.02193	111	1021
Cluster2	GO:0009887	animal organ morphogenesis	0.0009302	0.02193	175	1720
Cluster2	GO:0010035	response to inorganic substance	0.0009608	0.02254	85	747
Cluster2	GO:0006895	Golgi to endosome transport	0.00097	0.02254	7	21
Cluster2	GO:0051546	keratinocyte migration	0.00097	0.02254	7	21
Cluster2	GO:0034369	plasma lipoprotein particle remodeling	0.0009702	0.02254	9	33
Cluster2	GO:0034368	protein-lipid complex remodeling	0.0009702	0.02254	9	33
Cluster2	GO:0061744	motor behavior	0.0009702	0.02254	9	33
Cluster2	GO:0097479	synaptic vesicle localization	0.0009817	0.0227	14	68
Cluster2	GO:0019439	aromatic compound catabolic process	0.0009824	0.0227	72	613
Cluster2	GO:0048729	tissue morphogenesis	0.000984	0.0227	122	1141
Cluster2	GO:0010508	positive regulation of autophagy	0.0009917	0.02283	26	167
Cluster2	GO:0001959	regulation of cytokine-mediated signaling pathway	0.001016	0.02332	28	185
Cluster2	GO:0010565	regulation of cellular ketone metabolic process	0.00102	0.02332	29	194
Cluster2	GO:0010875	positive regulation of cholesterol efflux	0.00102	0.02332	8	27
Cluster2	GO:0090287	regulation of cellular response to growth factor stimulus	0.001026	0.02339	57	462
Cluster2	GO:0051292	nuclear pore complex assembly	0.001073	0.02435	5	11
Cluster2	GO:0051336	regulation of hydrolase activity	0.001077	0.02435	121	1133
Cluster2	GO:0016556	mRNA modification	0.001078	0.02435	10	40
Cluster2	GO:0060384	innervation	0.001078	0.02435	10	40
Cluster2	GO:0010611	regulation of cardiac muscle hypertrophy	0.001086	0.02447	17	92
Cluster2	GO:0051960	regulation of nervous system development	0.001093	0.02458	77	667
Cluster2	GO:0006886	intracellular protein transport	0.0011	0.02467	111	1026
Cluster2	GO:0035239	tube morphogenesis	0.001103	0.02468	153	1483
Cluster2	GO:0010970	transport along microtubule	0.001107	0.02471	29	195
Cluster2	GO:1900153	positive regulation of nuclear-transcribed mRNA catabolic process, deadenylation-dependent decay	0.00112	0.02483	6	16
Cluster2	GO:0060736	prostate gland growth	0.00112	0.02483	6	16
Cluster2	GO:0043201	response to leucine	0.00112	0.02483	6	16
Cluster2	GO:0032970	regulation of actin filament-based process	0.001136	0.02509	57	464
Cluster2	GO:0050773	regulation of dendrite development	0.001137	0.02509	24	151
Cluster2	GO:0050804	modulation of chemical synaptic transmission	0.00114	0.02511	77	668
Cluster2	GO:1901655	cellular response to ketone	0.001162	0.02554	22	134
Cluster2	GO:0001654	eye development	0.001165	0.02555	93	836
Cluster2	GO:0002757	immune response-activating signaling pathway	0.001168	0.02555	63	525
Cluster2	GO:0099177	regulation of trans-synaptic signaling	0.001189	0.02589	77	669
Cluster2	GO:0061448	connective tissue development	0.00119	0.02589	59	485
Cluster2	GO:2001235	positive regulation of apoptotic signaling pathway	0.001197	0.02589	27	178
Cluster2	GO:1900180	regulation of protein localization to nucleus	0.001197	0.02589	27	178
Cluster2	GO:0031960	response to corticosteroid	0.0012	0.02589	29	196
Cluster2	GO:0090316	positive regulation of intracellular protein transport	0.001202	0.02589	28	187
Cluster2	GO:0001934	positive regulation of protein phosphorylation	0.001202	0.02589	95	858
Cluster2	GO:0065005	protein-lipid complex assembly	0.001225	0.02629	9	34
Cluster2	GO:0010658	striated muscle cell apoptotic process	0.00123	0.02629	17	93
Cluster2	GO:0044042	glucan metabolic process	0.00123	0.02629	17	93
Cluster2	GO:0006508	proteolysis	0.001232	0.02629	198	1988
Cluster2	GO:1902603	carnitine transmembrane transport	0.001245	0.02651	4	7
Cluster2	GO:0060759	regulation of response to cytokine stimulus	0.001301	0.02758	29	197
Cluster2	GO:0150063	visual system development	0.001302	0.02758	93	839
Cluster2	GO:0043523	regulation of neuron apoptotic process	0.001304	0.02758	45	348
Cluster2	GO:0098542	defense response to other organism	0.001306	0.02758	149	1445
Cluster2	GO:0016049	cell growth	0.00131	0.0276	81	713
Cluster2	GO:0006958	complement activation, classical pathway	0.001323	0.02767	10	41
Cluster2	GO:0009259	ribonucleotide metabolic process	0.001324	0.02767	55	447
Cluster2	GO:0031468	nuclear membrane reassembly	0.001328	0.02767	8	28
Cluster2	GO:1902894	negative regulation of miRNA transcription	0.001328	0.02767	8	28
Cluster2	GO:0007039	protein catabolic process in the vacuole	0.001328	0.02767	8	28
Cluster2	GO:0071763	nuclear membrane organization	0.001341	0.02788	11	48
Cluster2	GO:0035023	regulation of Rho protein signal transduction	0.001366	0.02831	18	102
Cluster2	GO:0007155	cell adhesion	0.001373	0.02831	175	1735
Cluster2	GO:1902893	regulation of miRNA transcription	0.001373	0.02831	15	78
Cluster2	GO:0034605	cellular response to heat	0.001373	0.02831	15	78
Cluster2	GO:1901264	carbohydrate derivative transport	0.00139	0.02854	17	94
Cluster2	GO:2000628	regulation of miRNA metabolic process	0.00139	0.02854	17	94
Cluster2	GO:0051403	stress-activated MAPK cascade	0.001412	0.02892	40	301
Cluster2	GO:0009408	response to heat	0.001417	0.02893	22	136
Cluster2	GO:0090596	sensory organ morphogenesis	0.001418	0.02893	67	570
Cluster2	GO:0021955	central nervous system neuron axonogenesis	0.001439	0.02929	13	63
Cluster2	GO:0001933	negative regulation of protein phosphorylation	0.001462	0.02971	52	419
Cluster2	GO:0001558	regulation of cell growth	0.001483	0.03006	67	571
Cluster2	GO:0007626	locomotory behavior	0.001499	0.03032	47	370
Cluster2	GO:0043161	proteasome-mediated ubiquitin-dependent protein catabolic process	0.001518	0.03065	59	490
Cluster2	GO:0031667	response to nutrient levels	0.001531	0.03073	68	582
Cluster2	GO:0034367	protein-containing complex remodeling	0.001532	0.03073	9	35
Cluster2	GO:0017015	regulation of transforming growth factor beta receptor signaling pathway	0.001535	0.03073	26	172
Cluster2	GO:1903747	regulation of establishment of protein localization to mitochondrion	0.001538	0.03073	12	56
Cluster2	GO:0071825	protein-lipid complex organization	0.001538	0.03073	12	56
Cluster2	GO:0042551	neuron maturation	0.00157	0.03124	15	79
Cluster2	GO:0061614	miRNA transcription	0.00157	0.03124	15	79
Cluster2	GO:0010662	regulation of striated muscle cell apoptotic process	0.001582	0.03141	16	87
Cluster2	GO:0046320	regulation of fatty acid oxidation	0.001604	0.03169	11	49
Cluster2	GO:0007616	long-term memory	0.001604	0.03169	11	49
Cluster2	GO:0060211	regulation of nuclear-transcribed mRNA poly(A) tail shortening	0.001612	0.03169	6	17
Cluster2	GO:1900034	regulation of cellular response to heat	0.001612	0.03169	6	17
Cluster2	GO:0010896	regulation of triglyceride catabolic process	0.001612	0.03169	6	17
Cluster2	GO:0097191	extrinsic apoptotic signaling pathway	0.00162	0.03171	36	265
Cluster2	GO:0046890	regulation of lipid biosynthetic process	0.00162	0.03171	36	265
Cluster2	GO:0001568	blood vessel development	0.001632	0.03186	123	1168
Cluster2	GO:0031098	stress-activated protein kinase signaling cascade	0.001634	0.03186	41	313
Cluster2	GO:0048646	anatomical structure formation involved in morphogenesis	0.001637	0.03186	190	1910
Cluster2	GO:0033157	regulation of intracellular protein transport	0.001661	0.03225	39	294
Cluster2	GO:0042886	amide transport	0.00168	0.03256	58	482
Cluster2	GO:0051253	negative regulation of RNA metabolic process	0.00169	0.03268	167	1654
Cluster2	GO:0046618	xenobiotic export from cell	0.001704	0.0329	8	29
Cluster2	GO:0070973	protein localization to endoplasmic reticulum exit site	0.001716	0.033	5	12
Cluster2	GO:0097012	response to granulocyte macrophage colony-stimulating factor	0.001716	0.033	5	12
Cluster2	GO:0060760	positive regulation of response to cytokine stimulus	0.001754	0.03366	14	72
Cluster2	GO:0060576	intestinal epithelial cell development	0.001771	0.03371	7	23
Cluster2	GO:1905146	lysosomal protein catabolic process	0.001771	0.03371	7	23
Cluster2	GO:0046321	positive regulation of fatty acid oxidation	0.001771	0.03371	7	23
Cluster2	GO:0044321	response to leptin	0.001771	0.03371	7	23
Cluster2	GO:0048593	camera-type eye morphogenesis	0.001843	0.03501	41	315
Cluster2	GO:0048514	blood vessel morphogenesis	0.001857	0.03519	111	1042
Cluster2	GO:2001233	regulation of apoptotic signaling pathway	0.00186	0.03519	57	474
Cluster2	GO:0009150	purine ribonucleotide metabolic process	0.001892	0.03573	52	424
Cluster2	GO:0032273	positive regulation of protein polymerization	0.001916	0.03613	18	105
Cluster2	GO:0001961	positive regulation of cytokine-mediated signaling pathway	0.001939	0.03641	13	65
Cluster2	GO:0051438	regulation of ubiquitin-protein transferase activity	0.001939	0.03641	13	65
Cluster2	GO:0032872	regulation of stress-activated MAPK cascade	0.00197	0.03689	34	249
Cluster2	GO:0071356	cellular response to tumor necrosis factor	0.001972	0.03689	36	268
Cluster2	GO:0060560	developmental growth involved in morphogenesis	0.001991	0.03718	51	415
Cluster2	GO:1903690	negative regulation of wound healing, spreading of epidermal cells	0.002017	0.0373	3	4
Cluster2	GO:0072338	lactam metabolic process	0.002017	0.0373	3	4
Cluster2	GO:1904017	cellular response to Thyroglobulin triiodothyronine	0.002017	0.0373	3	4
Cluster2	GO:0015910	long-chain fatty acid import into peroxisome	0.002017	0.0373	3	4
Cluster2	GO:0046967	cytosol to endoplasmic reticulum transport	0.002017	0.0373	3	4
Cluster2	GO:0010659	cardiac muscle cell apoptotic process	0.002022	0.03731	16	89
Cluster2	GO:0019693	ribose phosphate metabolic process	0.00207	0.03813	55	456
Cluster2	GO:1902115	regulation of organelle assembly	0.002079	0.03823	38	288
Cluster2	GO:0051640	organelle localization	0.002089	0.03834	81	725
Cluster2	GO:0043010	camera-type eye development	0.002126	0.03893	82	736
Cluster2	GO:0008589	regulation of smoothened signaling pathway	0.002142	0.03915	20	123
Cluster2	GO:0003148	outflow tract septum morphogenesis	0.002161	0.03915	8	30
Cluster2	GO:2000629	negative regulation of miRNA metabolic process	0.002161	0.03915	8	30
Cluster2	GO:0070841	inclusion body assembly	0.002161	0.03915	8	30
Cluster2	GO:0019433	triglyceride catabolic process	0.002161	0.03915	8	30
Cluster2	GO:0001944	vasculature development	0.002161	0.03915	130	1254
Cluster2	GO:0007179	transforming growth factor beta receptor signaling pathway	0.002177	0.03936	35	260
Cluster2	GO:0050890	cognition	0.002199	0.03968	52	427
Cluster2	GO:0055086	nucleobase-containing small molecule metabolic process	0.002217	0.03992	78	695
Cluster2	GO:0032271	regulation of protein polymerization	0.002235	0.03997	32	232
Cluster2	GO:0050775	positive regulation of dendrite morphogenesis	0.002238	0.03997	13	66
Cluster2	GO:0071709	membrane assembly	0.002238	0.03997	13	66
Cluster2	GO:0000302	response to reactive oxygen species	0.002242	0.03997	36	270
Cluster2	GO:1990822	basic amino acid transmembrane transport	0.002254	0.03997	6	18
Cluster2	GO:0061684	chaperone-mediated autophagy	0.002254	0.03997	6	18
Cluster2	GO:0080009	mRNA methylation	0.002254	0.03997	6	18
Cluster2	GO:0048193	Golgi vesicle transport	0.002254	0.03997	43	338
Cluster2	GO:0048489	synaptic vesicle transport	0.002256	0.03997	11	51
Cluster2	GO:0050931	pigment cell differentiation	0.002277	0.04012	16	90
Cluster2	GO:0032374	regulation of cholesterol transport	0.002277	0.04012	16	90
Cluster2	GO:0032371	regulation of sterol transport	0.002277	0.04012	16	90
Cluster2	GO:0002009	morphogenesis of an epithelium	0.002293	0.04031	104	973
Cluster2	GO:0006163	purine nucleotide metabolic process	0.002311	0.04031	63	540
Cluster2	GO:0009306	protein secretion	0.002312	0.04031	59	499
Cluster2	GO:0048738	cardiac muscle tissue development	0.002313	0.04031	47	378
Cluster2	GO:0045934	negative regulation of nucleobase-containing compound metabolic process	0.002329	0.04031	178	1790
Cluster2	GO:1905508	protein localization to microtubule organizing center	0.002329	0.04031	9	37
Cluster2	GO:0021884	forebrain neuron development	0.002329	0.04031	9	37
Cluster2	GO:0150094	amyloid-beta clearance by cellular catabolic process	0.002329	0.04031	4	8
Cluster2	GO:0001834	trophectodermal cell proliferation	0.002329	0.04031	4	8
Cluster2	GO:0006208	pyrimidine nucleobase catabolic process	0.002329	0.04031	4	8
Cluster2	GO:0032373	positive regulation of sterol transport	0.002342	0.04038	10	44
Cluster2	GO:0032376	positive regulation of cholesterol transport	0.002342	0.04038	10	44
Cluster2	GO:0002764	immune response-regulating signaling pathway	0.00235	0.04038	65	561
Cluster2	GO:0021953	central nervous system neuron differentiation	0.00235	0.04038	38	290
Cluster2	GO:0006898	receptor-mediated endocytosis	0.002384	0.04088	43	339
Cluster2	GO:0072593	reactive oxygen species metabolic process	0.002395	0.04101	39	300
Cluster2	GO:0060284	regulation of cell development	0.002404	0.04108	123	1181
Cluster2	GO:0051701	biological process involved in interaction with host	0.002477	0.04221	35	262
Cluster2	GO:0072384	organelle transport along microtubule	0.002479	0.04221	17	99
Cluster2	GO:0014896	muscle hypertrophy	0.002486	0.04227	22	142
Cluster2	GO:0120161	regulation of cold-induced thermogenesis	0.002516	0.0427	23	151
Cluster2	GO:0035592	establishment of protein localization to extracellular region	0.002531	0.04288	59	501
Cluster2	GO:0048562	embryonic organ morphogenesis	0.002537	0.0429	75	667
Cluster2	GO:0045597	positive regulation of cell differentiation	0.002548	0.04301	123	1183
Cluster2	GO:0070302	regulation of stress-activated protein kinase signaling cascade	0.002566	0.04325	34	253
Cluster2	GO:0034330	cell junction organization	0.002573	0.04328	102	955
Cluster2	GO:0061572	actin filament bundle organization	0.002583	0.04338	29	206
Cluster2	GO:0031953	negative regulation of protein autophosphorylation	0.002604	0.04365	5	13
Cluster2	GO:0010665	regulation of cardiac muscle cell apoptotic process	0.002609	0.04367	15	83
Cluster2	GO:0001701	in utero embryonic development	0.002654	0.04429	68	595
Cluster2	GO:0031952	regulation of protein autophosphorylation	0.002655	0.04429	11	52
Cluster2	GO:1904659	glucose transmembrane transport	0.002742	0.04566	23	152
Cluster2	GO:0007507	heart development	0.002801	0.04656	113	1077
Cluster2	GO:0045936	negative regulation of phosphate metabolic process	0.002823	0.04683	61	524
Cluster2	GO:0043410	positive regulation of MAPK cascade	0.002831	0.04689	69	607
Cluster2	GO:0051129	negative regulation of cellular component organization	0.002896	0.04789	96	894
Cluster2	GO:0043434	response to peptide hormone	0.002908	0.04794	62	535
Cluster2	GO:0097435	supramolecular fiber organization	0.002909	0.04794	107	1013
Cluster2	GO:0050767	regulation of neurogenesis	0.002947	0.04841	64	556
Cluster2	GO:0010563	negative regulation of phosphorus metabolic process	0.002948	0.04841	61	525
Cluster2	GO:0006749	glutathione metabolic process	0.002975	0.04879	14	76
Cluster2	GO:0044000	movement in host	0.003024	0.04949	31	227
Cluster2	GO:0032886	regulation of microtubule-based process	0.003029	0.04949	39	304
Cluster2	GO:0007178	transmembrane receptor protein serine/threonine kinase signaling pathway	0.003035	0.04951	62	536
Cluster2	GO:0044320	cellular response to leptin stimulus	0.003069	0.04996	6	19
Cluster2	GO:0051656	establishment of organelle localization	0.003073	0.04996	64	557
Cluster3	GO:0044248	cellular catabolic process	3.363e-29	3.309e-25	322	1796
Cluster3	GO:0046907	intracellular transport	2.206e-25	1.085e-21	316	1838
Cluster3	GO:1901565	organonitrogen compound catabolic process	9.736e-25	3.194e-21	279	1566
Cluster3	GO:0009057	macromolecule catabolic process	5.37e-22	1.321e-18	280	1639
Cluster3	GO:0061919	process utilizing autophagic mechanism	1.257e-21	2.062e-18	143	642
Cluster3	GO:0006914	autophagy	1.257e-21	2.062e-18	143	642
Cluster3	GO:0030163	protein catabolic process	7.81e-21	1.098e-17	216	1175
Cluster3	GO:0015031	protein transport	1.903e-19	2.341e-16	300	1867
Cluster3	GO:0045184	establishment of protein localization	3.707e-19	4.054e-16	315	1998
Cluster3	GO:0006508	proteolysis	6.061e-19	5.965e-16	313	1988
Cluster3	GO:0006886	intracellular protein transport	9.724e-19	8.7e-16	190	1026
Cluster3	GO:0009894	regulation of catabolic process	1.293e-18	1.06e-15	216	1225
Cluster3	GO:0051603	proteolysis involved in protein catabolic process	2.27e-18	1.718e-15	168	872
Cluster3	GO:0043632	modification-dependent macromolecule catabolic process	2.719e-18	1.911e-15	154	773
Cluster3	GO:0019941	modification-dependent protein catabolic process	3.578e-18	2.347e-15	152	761
Cluster3	GO:0006511	ubiquitin-dependent protein catabolic process	6.849e-18	4.212e-15	150	752
Cluster3	GO:0031329	regulation of cellular catabolic process	1.253e-17	7.256e-15	157	807
Cluster3	GO:0010506	regulation of autophagy	1.187e-16	6.491e-14	96	406
Cluster3	GO:0070647	protein modification by small protein conjugation or removal	1.712e-15	8.866e-13	189	1093
Cluster3	GO:0016236	macroautophagy	3.196e-14	1.572e-11	81	343
Cluster3	GO:0043161	proteasome-mediated ubiquitin-dependent protein catabolic process	3.843e-14	1.801e-11	103	490
Cluster3	GO:0010498	proteasomal protein catabolic process	3.068e-13	1.372e-10	112	569
Cluster3	GO:0033365	protein localization to organelle	4.168e-13	1.783e-10	180	1085
Cluster3	GO:0006082	organic acid metabolic process	7.013e-13	2.875e-10	183	1115
Cluster3	GO:0043436	oxoacid metabolic process	8.214e-13	3.233e-10	182	1109
Cluster3	GO:0048193	Golgi vesicle transport	9.917e-13	3.754e-10	77	338
Cluster3	GO:0019752	carboxylic acid metabolic process	5.561e-12	1.959e-09	176	1085
Cluster3	GO:0000209	protein polyubiquitination	5.574e-12	1.959e-09	67	284
Cluster3	GO:0016192	vesicle-mediated transport	6.001e-12	2.036e-09	265	1822
Cluster3	GO:0034504	protein localization to nucleus	8.396e-12	2.754e-09	80	372
Cluster3	GO:0045893	positive regulation of DNA-templated transcription	2.72e-11	8.633e-09	271	1899
Cluster3	GO:0032446	protein modification by small protein conjugation	3.763e-11	1.142e-08	155	942
Cluster3	GO:1902680	positive regulation of RNA biosynthetic process	3.829e-11	1.142e-08	271	1905
Cluster3	GO:0019637	organophosphate metabolic process	6.135e-11	1.776e-08	172	1084
Cluster3	GO:0044255	cellular lipid metabolic process	6.824e-11	1.919e-08	178	1134
Cluster3	GO:0046486	glycerolipid metabolic process	8.781e-11	2.379e-08	86	431
Cluster3	GO:0016567	protein ubiquitination	8.946e-11	2.379e-08	143	858
Cluster3	GO:0009896	positive regulation of catabolic process	9.973e-11	2.583e-08	117	659
Cluster3	GO:0071375	cellular response to peptide hormone stimulus	1.454e-10	3.67e-08	79	386
Cluster3	GO:0006629	lipid metabolic process	1.916e-10	4.713e-08	232	1599
Cluster3	GO:0032870	cellular response to hormone stimulus	2.713e-10	6.511e-08	128	754
Cluster3	GO:0032869	cellular response to insulin stimulus	4.669e-10	1.094e-07	62	279
Cluster3	GO:0007033	vacuole organization	5.183e-10	1.186e-07	57	247
Cluster3	GO:0008286	insulin receptor signaling pathway	5.953e-10	1.331e-07	43	161
Cluster3	GO:1901653	cellular response to peptide	1.831e-09	4.003e-07	86	457
Cluster3	GO:0072594	establishment of protein localization to organelle	2.276e-09	4.869e-07	94	518
Cluster3	GO:0007034	vacuolar transport	2.781e-09	5.823e-07	46	187
Cluster3	GO:0008610	lipid biosynthetic process	3.45e-09	7.073e-07	135	840
Cluster3	GO:1901135	carbohydrate derivative metabolic process	3.677e-09	7.385e-07	180	1209
Cluster3	GO:0071495	cellular response to endogenous stimulus	4.036e-09	7.943e-07	258	1879
Cluster3	GO:0009792	embryo development ending in birth or egg hatching	4.158e-09	8.024e-07	188	1278
Cluster3	GO:0035966	response to topologically incorrect protein	4.441e-09	8.405e-07	43	171
Cluster3	GO:0007169	transmembrane receptor protein tyrosine kinase signaling pathway	4.615e-09	8.569e-07	128	788
Cluster3	GO:0043009	chordate embryonic development	4.762e-09	8.679e-07	185	1255
Cluster3	GO:0031331	positive regulation of cellular catabolic process	6.638e-09	1.188e-06	80	425
Cluster3	GO:0061024	membrane organization	9.678e-09	1.692e-06	147	951
Cluster3	GO:0060341	regulation of cellular localization	9.798e-09	1.692e-06	183	1250
Cluster3	GO:0034976	response to endoplasmic reticulum stress	2.308e-08	3.916e-06	62	307
Cluster3	GO:0032880	regulation of protein localization	2.415e-08	4.028e-06	166	1122
Cluster3	GO:1905037	autophagosome organization	2.649e-08	4.344e-06	33	120
Cluster3	GO:0016050	vesicle organization	2.991e-08	4.811e-06	77	417
Cluster3	GO:0030433	ubiquitin-dependent ERAD pathway	3.031e-08	4.811e-06	27	87
Cluster3	GO:0016482	cytosolic transport	3.092e-08	4.83e-06	46	201
Cluster3	GO:0044283	small molecule biosynthetic process	3.31e-08	5.031e-06	113	694
Cluster3	GO:0009895	negative regulation of catabolic process	3.323e-08	5.031e-06	77	418
Cluster3	GO:0007041	lysosomal transport	3.375e-08	5.032e-06	38	151
Cluster3	GO:0070646	protein modification by small protein removal	3.587e-08	5.269e-06	44	189
Cluster3	GO:0036503	ERAD pathway	3.95e-08	5.717e-06	32	116
Cluster3	GO:0016579	protein deubiquitination	4.322e-08	6.164e-06	41	171
Cluster3	GO:0051247	positive regulation of protein metabolic process	5.053e-08	7.062e-06	232	1702
Cluster3	GO:0009063	amino acid catabolic process	5.095e-08	7.062e-06	33	123
Cluster3	GO:0010256	endomembrane system organization	5.649e-08	7.721e-06	110	677
Cluster3	GO:0000045	autophagosome assembly	5.889e-08	7.939e-06	31	112
Cluster3	GO:0006986	response to unfolded protein	6.125e-08	8.145e-06	37	148
Cluster3	GO:0010243	response to organonitrogen compound	6.248e-08	8.198e-06	187	1316
Cluster3	GO:0016054	organic acid catabolic process	7.169e-08	9.162e-06	57	281
Cluster3	GO:0046395	carboxylic acid catabolic process	7.169e-08	9.162e-06	57	281
Cluster3	GO:0009725	response to hormone	8.371e-08	1.056e-05	160	1092
Cluster3	GO:0007167	enzyme-linked receptor protein signaling pathway	9.136e-08	1.138e-05	180	1263
Cluster3	GO:0043434	response to peptide hormone	9.817e-08	1.208e-05	91	535
Cluster3	GO:0044093	positive regulation of molecular function	1.061e-07	1.289e-05	240	1788
Cluster3	GO:0006644	phospholipid metabolic process	1.122e-07	1.346e-05	75	415
Cluster3	GO:0010507	negative regulation of autophagy	1.14e-07	1.352e-05	31	115
Cluster3	GO:0006325	chromatin organization	1.17e-07	1.371e-05	129	840
Cluster3	GO:0070534	protein K63-linked ubiquitination	1.211e-07	1.402e-05	24	76
Cluster3	GO:0061008	hepaticobiliary system development	1.388e-07	1.588e-05	63	329
Cluster3	GO:1900180	regulation of protein localization to nucleus	1.413e-07	1.599e-05	41	178
Cluster3	GO:0032868	response to insulin	1.43e-07	1.6e-05	66	351
Cluster3	GO:0080135	regulation of cellular response to stress	1.472e-07	1.627e-05	132	868
Cluster3	GO:0032787	monocarboxylic acid metabolic process	1.512e-07	1.654e-05	116	738
Cluster3	GO:0001889	liver development	1.592e-07	1.721e-05	62	323
Cluster3	GO:0006790	sulfur compound metabolic process	1.66e-07	1.775e-05	68	367
Cluster3	GO:0006888	endoplasmic reticulum to Golgi vesicle-mediated transport	1.731e-07	1.832e-05	38	160
Cluster3	GO:0022411	cellular component disassembly	1.795e-07	1.879e-05	96	581
Cluster3	GO:0042594	response to starvation	1.896e-07	1.964e-05	50	240
Cluster3	GO:0042176	regulation of protein catabolic process	1.937e-07	1.985e-05	74	413
Cluster3	GO:0031669	cellular response to nutrient levels	1.968e-07	1.997e-05	55	275
Cluster3	GO:1903513	endoplasmic reticulum to cytosol transport	2.197e-07	2.184e-05	14	30
Cluster3	GO:0030970	retrograde protein transport, ER to cytosol	2.197e-07	2.184e-05	14	30
Cluster3	GO:0045017	glycerolipid biosynthetic process	2.533e-07	2.493e-05	54	270
Cluster3	GO:0016071	mRNA metabolic process	2.612e-07	2.545e-05	133	885
Cluster3	GO:0006650	glycerophospholipid metabolic process	2.876e-07	2.753e-05	61	321
Cluster3	GO:0016241	regulation of macroautophagy	2.881e-07	2.753e-05	38	163
Cluster3	GO:0001701	in utero embryonic development	2.945e-07	2.787e-05	97	595
Cluster3	GO:0030111	regulation of Wnt signaling pathway	3.013e-07	2.824e-05	73	410
Cluster3	GO:1901698	response to nitrogen compound	3.146e-07	2.921e-05	194	1407
Cluster3	GO:0097352	autophagosome maturation	3.339e-07	3.071e-05	22	69
Cluster3	GO:0006623	protein targeting to vacuole	3.592e-07	3.273e-05	18	49
Cluster3	GO:0031330	negative regulation of cellular catabolic process	3.697e-07	3.338e-05	51	252
Cluster3	GO:0071824	protein-DNA complex organization	4.61e-07	4.104e-05	139	944
Cluster3	GO:0006468	protein phosphorylation	4.644e-07	4.104e-05	237	1794
Cluster3	GO:0016197	endosomal transport	4.671e-07	4.104e-05	54	275
Cluster3	GO:0032434	regulation of proteasomal ubiquitin-dependent protein catabolic process	5.461e-07	4.756e-05	36	154
Cluster3	GO:0046488	phosphatidylinositol metabolic process	5.539e-07	4.781e-05	38	167
Cluster3	GO:1900076	regulation of cellular response to insulin stimulus	5.707e-07	4.883e-05	27	99
Cluster3	GO:0045732	positive regulation of protein catabolic process	6.927e-07	5.877e-05	48	236
Cluster3	GO:0035967	cellular response to topologically incorrect protein	7.019e-07	5.904e-05	31	124
Cluster3	GO:0080134	regulation of response to stress	7.275e-07	6.067e-05	243	1858
Cluster3	GO:0070925	organelle assembly	7.383e-07	6.106e-05	175	1259
Cluster3	GO:0043543	protein acylation	7.814e-07	6.408e-05	51	258
Cluster3	GO:0006091	generation of precursor metabolites and energy	8.128e-07	6.611e-05	86	521
Cluster3	GO:0016311	dephosphorylation	8.437e-07	6.806e-05	66	368
Cluster3	GO:0043603	amide metabolic process	8.614e-07	6.892e-05	196	1445
Cluster3	GO:1901652	response to peptide	1.004e-06	7.97e-05	99	627
Cluster3	GO:2000058	regulation of ubiquitin-dependent protein catabolic process	1.034e-06	8.137e-05	41	191
Cluster3	GO:0045944	positive regulation of transcription by RNA polymerase II	1.058e-06	8.261e-05	193	1423
Cluster3	GO:0062012	regulation of small molecule metabolic process	1.147e-06	8.884e-05	77	455
Cluster3	GO:0072665	protein localization to vacuole	1.208e-06	9.286e-05	24	85
Cluster3	GO:0046626	regulation of insulin receptor signaling pathway	1.318e-06	0.0001006	26	97
Cluster3	GO:0006520	amino acid metabolic process	1.347e-06	0.000102	60	328
Cluster3	GO:0035295	tube development	1.361e-06	0.0001023	242	1864
Cluster3	GO:0006890	retrograde vesicle-mediated transport, Golgi to endoplasmic reticulum	1.372e-06	0.0001023	18	53
Cluster3	GO:0051648	vesicle localization	1.394e-06	0.0001031	52	270
Cluster3	GO:0010508	positive regulation of autophagy	1.541e-06	0.0001132	37	167
Cluster3	GO:0006605	protein targeting	1.606e-06	0.0001171	70	405
Cluster3	GO:0044087	regulation of cellular component biogenesis	1.72e-06	0.0001245	165	1189
Cluster3	GO:0005975	carbohydrate metabolic process	1.763e-06	0.0001266	101	651
Cluster3	GO:0009267	cellular response to starvation	1.814e-06	0.0001293	41	195
Cluster3	GO:0006639	acylglycerol metabolic process	1.843e-06	0.0001305	35	155
Cluster3	GO:0090407	organophosphate biosynthetic process	1.89e-06	0.0001329	101	652
Cluster3	GO:1902115	regulation of organelle assembly	2.073e-06	0.0001445	54	288
Cluster3	GO:0010038	response to metal ion	2.084e-06	0.0001445	77	462
Cluster3	GO:0031399	regulation of protein modification process	2.13e-06	0.0001466	232	1785
Cluster3	GO:0008654	phospholipid biosynthetic process	2.458e-06	0.0001679	52	275
Cluster3	GO:0006638	neutral lipid metabolic process	2.517e-06	0.0001709	35	157
Cluster3	GO:0071496	cellular response to external stimulus	2.753e-06	0.0001855	70	411
Cluster3	GO:0072666	establishment of protein localization to vacuole	2.77e-06	0.0001855	20	66
Cluster3	GO:0006891	intra-Golgi vesicle-mediated transport	3.261e-06	0.0002168	14	36
Cluster3	GO:0032527	protein exit from endoplasmic reticulum	3.388e-06	0.0002238	18	56
Cluster3	GO:0048732	gland development	3.71e-06	0.0002434	110	736
Cluster3	GO:0000122	negative regulation of transcription by RNA polymerase II	3.795e-06	0.0002469	158	1144
Cluster3	GO:0006006	glucose metabolic process	3.814e-06	0.0002469	48	250
Cluster3	GO:0031668	cellular response to extracellular stimulus	3.844e-06	0.0002472	57	316
Cluster3	GO:0006473	protein acetylation	4.068e-06	0.0002599	43	215
Cluster3	GO:0006338	chromatin remodeling	4.311e-06	0.0002737	105	697
Cluster3	GO:0051650	establishment of vesicle localization	4.371e-06	0.0002758	47	244
Cluster3	GO:0034620	cellular response to unfolded protein	4.456e-06	0.0002785	26	103
Cluster3	GO:0035196	miRNA processing	4.503e-06	0.0002785	18	57
Cluster3	GO:0048284	organelle fusion	4.511e-06	0.0002785	39	188
Cluster3	GO:0043112	receptor metabolic process	4.529e-06	0.0002785	24	91
Cluster3	GO:0009074	aromatic amino acid family catabolic process	4.788e-06	0.0002922	9	16
Cluster3	GO:0044282	small molecule catabolic process	4.809e-06	0.0002922	72	433
Cluster3	GO:0030522	intracellular receptor signaling pathway	5.661e-06	0.0003418	64	373
Cluster3	GO:0019216	regulation of lipid metabolic process	5.985e-06	0.0003592	77	475
Cluster3	GO:0006622	protein targeting to lysosome	6.187e-06	0.000369	13	33
Cluster3	GO:0070936	protein K48-linked ubiquitination	6.668e-06	0.0003953	22	81
Cluster3	GO:0032386	regulation of intracellular transport	7.061e-06	0.0004156	70	422
Cluster3	GO:1903008	organelle disassembly	7.094e-06	0.0004156	35	164
Cluster3	GO:0006631	fatty acid metabolic process	7.521e-06	0.0004379	76	470
Cluster3	GO:0019318	hexose metabolic process	7.619e-06	0.00044	53	293
Cluster3	GO:0005996	monosaccharide metabolic process	7.645e-06	0.00044	57	323
Cluster3	GO:0016032	viral process	8.209e-06	0.0004697	81	511
Cluster3	GO:0034660	ncRNA metabolic process	8.505e-06	0.0004838	99	658
Cluster3	GO:0051640	organelle localization	8.846e-06	0.0005003	107	725
Cluster3	GO:0030162	regulation of proteolysis	9.016e-06	0.0005027	123	860
Cluster3	GO:0031929	TOR signaling	9.113e-06	0.0005027	34	159
Cluster3	GO:0034032	purine nucleoside bisphosphate metabolic process	9.143e-06	0.0005027	31	139
Cluster3	GO:0033865	nucleoside bisphosphate metabolic process	9.143e-06	0.0005027	31	139
Cluster3	GO:0033875	ribonucleoside bisphosphate metabolic process	9.143e-06	0.0005027	31	139
Cluster3	GO:0006475	internal protein amino acid acetylation	9.396e-06	0.0005137	35	166
Cluster3	GO:0046474	glycerophospholipid biosynthetic process	9.493e-06	0.0005162	43	222
Cluster3	GO:0006913	nucleocytoplasmic transport	9.614e-06	0.0005198	64	379
Cluster3	GO:0009968	negative regulation of signal transduction	9.896e-06	0.0005322	209	1616
Cluster3	GO:0051169	nuclear transport	1.048e-05	0.0005606	64	380
Cluster3	GO:0055086	nucleobase-containing small molecule metabolic process	1.086e-05	0.0005774	103	695
Cluster3	GO:0033043	regulation of organelle organization	1.095e-05	0.0005794	184	1395
Cluster3	GO:0198738	cell-cell signaling by wnt	1.126e-05	0.0005923	88	572
Cluster3	GO:0006753	nucleoside phosphate metabolic process	1.133e-05	0.0005932	93	613
Cluster3	GO:0009117	nucleotide metabolic process	1.149e-05	0.0005981	92	605
Cluster3	GO:0006163	purine nucleotide metabolic process	1.165e-05	0.0006031	84	540
Cluster3	GO:0016573	histone acetylation	1.171e-05	0.0006031	33	154
Cluster3	GO:0031667	response to nutrient levels	1.276e-05	0.0006538	89	582
Cluster3	GO:0031647	regulation of protein stability	1.415e-05	0.0007217	62	368
Cluster3	GO:0071417	cellular response to organonitrogen compound	1.445e-05	0.000733	120	843
Cluster3	GO:0061462	protein localization to lysosome	1.487e-05	0.0007448	17	56
Cluster3	GO:0046627	negative regulation of insulin receptor signaling pathway	1.487e-05	0.0007448	17	56
Cluster3	GO:0043648	dicarboxylic acid metabolic process	1.491e-05	0.0007448	27	116
Cluster3	GO:0006974	DNA damage response	1.5e-05	0.0007453	133	955
Cluster3	GO:0072521	purine-containing compound metabolic process	1.58e-05	0.0007779	88	577
Cluster3	GO:1901605	alpha-amino acid metabolic process	1.585e-05	0.0007779	45	241
Cluster3	GO:0032006	regulation of TOR signaling	1.589e-05	0.0007779	30	136
Cluster3	GO:0006606	protein import into nucleus	1.62e-05	0.000789	39	198
Cluster3	GO:0016055	Wnt signaling pathway	1.711e-05	0.0008294	87	570
Cluster3	GO:0043605	amide catabolic process	1.743e-05	0.0008406	12	31
Cluster3	GO:0006892	post-Golgi vesicle-mediated transport	1.76e-05	0.0008449	27	117
Cluster3	GO:0018393	internal peptidyl-lysine acetylation	1.822e-05	0.0008705	34	164
Cluster3	GO:0006906	vesicle fusion	1.931e-05	0.0009182	31	144
Cluster3	GO:0051174	regulation of phosphorus metabolic process	2.105e-05	0.0009931	205	1599
Cluster3	GO:0018394	peptidyl-lysine acetylation	2.109e-05	0.0009931	36	179
Cluster3	GO:1903829	positive regulation of protein localization	2.169e-05	0.001016	89	590
Cluster3	GO:0045862	positive regulation of proteolysis	2.33e-05	0.001087	70	437
Cluster3	GO:0016053	organic acid biosynthetic process	2.417e-05	0.001122	64	390
Cluster3	GO:0061025	membrane fusion	2.49e-05	0.00115	41	216
Cluster3	GO:0046496	nicotinamide nucleotide metabolic process	2.547e-05	0.001166	24	100
Cluster3	GO:0019362	pyridine nucleotide metabolic process	2.547e-05	0.001166	24	100
Cluster3	GO:0090174	organelle membrane fusion	2.57e-05	0.001171	31	146
Cluster3	GO:0006783	heme biosynthetic process	2.647e-05	0.001201	13	37
Cluster3	GO:0023057	negative regulation of signaling	2.723e-05	0.001229	223	1769
Cluster3	GO:0060429	epithelium development	2.748e-05	0.001235	248	1998
Cluster3	GO:0018205	peptidyl-lysine modification	2.839e-05	0.00127	64	392
Cluster3	GO:0019220	regulation of phosphate metabolic process	2.873e-05	0.001279	204	1598
Cluster3	GO:1901699	cellular response to nitrogen compound	3.006e-05	0.001333	124	891
Cluster3	GO:0010648	negative regulation of cell communication	3.038e-05	0.001341	223	1772
Cluster3	GO:0061136	regulation of proteasomal protein catabolic process	3.112e-05	0.001367	41	218
Cluster3	GO:0090207	regulation of triglyceride metabolic process	3.17e-05	0.001387	17	59
Cluster3	GO:0038202	TORC1 signaling	3.381e-05	0.001472	18	65
Cluster3	GO:0006641	triglyceride metabolic process	3.529e-05	0.00153	28	128
Cluster3	GO:0051170	import into nucleus	3.682e-05	0.001583	39	205
Cluster3	GO:1903432	regulation of TORC1 signaling	3.683e-05	0.001583	16	54
Cluster3	GO:0072524	pyridine-containing compound metabolic process	3.961e-05	0.001695	25	109
Cluster3	GO:0007030	Golgi organization	4.504e-05	0.001919	34	171
Cluster3	GO:0090630	activation of GTPase activity	4.528e-05	0.001921	27	123
Cluster3	GO:1903050	regulation of proteolysis involved in protein catabolic process	4.719e-05	0.001993	46	259
Cluster3	GO:1901701	cellular response to oxygen-containing compound	4.873e-05	0.002049	214	1703
Cluster3	GO:0032984	protein-containing complex disassembly	5.035e-05	0.002108	50	290
Cluster3	GO:1900077	negative regulation of cellular response to insulin stimulus	5.077e-05	0.002117	17	61
Cluster3	GO:0019693	ribose phosphate metabolic process	5.227e-05	0.00217	71	456
Cluster3	GO:0046889	positive regulation of lipid biosynthetic process	5.257e-05	0.002174	27	124
Cluster3	GO:0070201	regulation of establishment of protein localization	5.295e-05	0.00218	103	722
Cluster3	GO:0045815	transcription initiation-coupled chromatin remodeling	5.46e-05	0.002239	15	50
Cluster3	GO:0030097	hemopoiesis	5.574e-05	0.002276	195	1534
Cluster3	GO:0051604	protein maturation	5.699e-05	0.002317	68	433
Cluster3	GO:0045934	negative regulation of nucleobase-containing compound metabolic process	5.767e-05	0.002336	223	1790
Cluster3	GO:0006094	gluconeogenesis	5.809e-05	0.002343	26	118
Cluster3	GO:0016570	histone modification	6.149e-05	0.00247	67	426
Cluster3	GO:0043966	histone H3 acetylation	6.507e-05	0.002603	18	68
Cluster3	GO:0046394	carboxylic acid biosynthetic process	6.629e-05	0.002641	62	387
Cluster3	GO:0030968	endoplasmic reticulum unfolded protein response	7.303e-05	0.002898	21	87
Cluster3	GO:0006739	NADP metabolic process	7.622e-05	0.003012	16	57
Cluster3	GO:0051099	positive regulation of binding	8.076e-05	0.003168	41	227
Cluster3	GO:0065003	protein-containing complex assembly	8.079e-05	0.003168	234	1901
Cluster3	GO:0060828	regulation of canonical Wnt signaling pathway	8.236e-05	0.003216	52	311
Cluster3	GO:0051253	negative regulation of RNA metabolic process	8.292e-05	0.003225	207	1654
Cluster3	GO:0048878	chemical homeostasis	8.355e-05	0.003232	171	1328
Cluster3	GO:0008203	cholesterol metabolic process	8.374e-05	0.003232	33	169
Cluster3	GO:0034058	endosomal vesicle fusion	8.444e-05	0.003233	7	13
Cluster3	GO:0090160	Golgi to lysosome transport	8.444e-05	0.003233	7	13
Cluster3	GO:0032092	positive regulation of protein binding	8.671e-05	0.003308	25	114
Cluster3	GO:0009991	response to extracellular stimulus	8.767e-05	0.003331	90	621
Cluster3	GO:1901606	alpha-amino acid catabolic process	8.923e-05	0.003378	23	101
Cluster3	GO:0034470	ncRNA processing	9.206e-05	0.003471	70	456
Cluster3	GO:0018193	peptidyl-amino acid modification	9.329e-05	0.003504	163	1259
Cluster3	GO:0048598	embryonic morphogenesis	9.922e-05	0.003713	155	1189
Cluster3	GO:1902652	secondary alcohol metabolic process	0.0001011	0.003768	35	185
Cluster3	GO:1903716	guanine transmembrane transport	0.0001016	0.003772	4	4
Cluster3	GO:0048568	embryonic organ development	0.0001043	0.003838	134	1004
Cluster3	GO:0019319	hexose biosynthetic process	0.0001046	0.003838	26	122
Cluster3	GO:0032436	positive regulation of proteasomal ubiquitin-dependent protein catabolic process	0.0001047	0.003838	23	102
Cluster3	GO:0051656	establishment of organelle localization	0.0001049	0.003838	82	557
Cluster3	GO:0043122	regulation of canonical NF-kappaB signal transduction	0.0001065	0.00388	48	283
Cluster3	GO:0009967	positive regulation of signal transduction	0.0001075	0.003893	231	1882
Cluster3	GO:0040007	growth	0.0001076	0.003893	185	1461
Cluster3	GO:0009628	response to abiotic stimulus	0.0001081	0.003893	195	1552
Cluster3	GO:0042325	regulation of phosphorylation	0.0001088	0.003893	180	1416
Cluster3	GO:0006661	phosphatidylinositol biosynthetic process	0.0001092	0.003893	28	136
Cluster3	GO:0000956	nuclear-transcribed mRNA catabolic process	0.0001092	0.003893	28	136
Cluster3	GO:1904951	positive regulation of establishment of protein localization	0.000111	0.003942	64	410
Cluster3	GO:0051090	regulation of DNA-binding transcription factor activity	0.0001114	0.003942	79	533
Cluster3	GO:0006779	porphyrin-containing compound biosynthetic process	0.0001191	0.004185	13	42
Cluster3	GO:0033014	tetrapyrrole biosynthetic process	0.0001191	0.004185	13	42
Cluster3	GO:0006896	Golgi to vacuole transport	0.0001208	0.004231	9	22
Cluster3	GO:0045892	negative regulation of DNA-templated transcription	0.0001236	0.004312	188	1492
Cluster3	GO:0006066	alcohol metabolic process	0.0001248	0.00434	67	436
Cluster3	GO:0030258	lipid modification	0.0001264	0.004381	40	224
Cluster3	GO:0006547	histidine metabolic process	0.0001276	0.004407	6	10
Cluster3	GO:0006637	acyl-CoA metabolic process	0.0001294	0.004424	24	110
Cluster3	GO:0035383	thioester metabolic process	0.0001294	0.004424	24	110
Cluster3	GO:1903320	regulation of protein modification by small protein conjugation or removal	0.0001295	0.004424	49	293
Cluster3	GO:0016242	negative regulation of macroautophagy	0.0001384	0.004695	11	32
Cluster3	GO:0019082	viral protein processing	0.0001384	0.004695	11	32
Cluster3	GO:0033157	regulation of intracellular protein transport	0.0001409	0.004766	49	294
Cluster3	GO:0042147	retrograde transport, endosome to Golgi	0.000143	0.004819	23	104
Cluster3	GO:0036508	protein alpha-1,2-demannosylation	0.0001451	0.004858	8	18
Cluster3	GO:0036507	protein demannosylation	0.0001451	0.004858	8	18
Cluster3	GO:0019439	aromatic compound catabolic process	0.0001459	0.004867	88	613
Cluster3	GO:0043085	positive regulation of catalytic activity	0.0001496	0.004975	168	1316
Cluster3	GO:0009259	ribonucleotide metabolic process	0.0001513	0.005012	68	447
Cluster3	GO:0035162	embryonic hemopoiesis	0.0001553	0.005113	25	118
Cluster3	GO:0019080	viral gene expression	0.0001553	0.005113	25	118
Cluster3	GO:0006470	protein dephosphorylation	0.0001571	0.005153	46	272
Cluster3	GO:1901800	positive regulation of proteasomal protein catabolic process	0.0001609	0.005262	27	132
Cluster3	GO:0016125	sterol metabolic process	0.0001625	0.005294	34	182
Cluster3	GO:1905897	regulation of response to endoplasmic reticulum stress	0.0001736	0.005638	24	112
Cluster3	GO:0006903	vesicle targeting	0.0001751	0.005669	18	73
Cluster3	GO:0046854	phosphatidylinositol phosphate biosynthetic process	0.000181	0.005841	17	67
Cluster3	GO:0000422	autophagy of mitochondrion	0.0001836	0.005905	22	99
Cluster3	GO:0060070	canonical Wnt signaling pathway	0.0001888	0.00605	58	369
Cluster3	GO:0032801	receptor catabolic process	0.0001894	0.00605	11	33
Cluster3	GO:0007032	endosome organization	0.0001932	0.006142	23	106
Cluster3	GO:0071214	cellular response to abiotic stimulus	0.0001941	0.006142	64	418
Cluster3	GO:0104004	cellular response to environmental stimulus	0.0001941	0.006142	64	418
Cluster3	GO:0070085	glycosylation	0.0002036	0.006423	46	275
Cluster3	GO:1902532	negative regulation of intracellular signal transduction	0.0002113	0.006644	96	688
Cluster3	GO:0042168	heme metabolic process	0.0002247	0.007043	15	56
Cluster3	GO:1902679	negative regulation of RNA biosynthetic process	0.0002259	0.007059	188	1509
Cluster3	GO:0042180	cellular ketone metabolic process	0.0002286	0.00712	48	292
Cluster3	GO:1900182	positive regulation of protein localization to nucleus	0.0002306	0.007159	24	114
Cluster3	GO:0007005	mitochondrion organization	0.0002395	0.007413	90	639
Cluster3	GO:0097190	apoptotic signaling pathway	0.000245	0.007557	101	734
Cluster3	GO:0051223	regulation of protein transport	0.0002467	0.007586	96	691
Cluster3	GO:1901137	carbohydrate derivative biosynthetic process	0.0002533	0.007765	103	752
Cluster3	GO:0010565	regulation of cellular ketone metabolic process	0.0002646	0.008064	35	194
Cluster3	GO:0044154	histone H3-K14 acetylation	0.0002655	0.008064	7	15
Cluster3	GO:1904380	endoplasmic reticulum mannose trimming	0.0002655	0.008064	7	15
Cluster3	GO:2000060	positive regulation of ubiquitin-dependent protein catabolic process	0.0002686	0.008132	25	122
Cluster3	GO:1904263	positive regulation of TORC1 signaling	0.0002701	0.008152	10	29
Cluster3	GO:0009100	glycoprotein metabolic process	0.0002719	0.008182	68	456
Cluster3	GO:0015711	organic anion transport	0.000273	0.008191	74	506
Cluster3	GO:0050821	protein stabilization	0.0002798	0.00837	41	240
Cluster3	GO:0055082	intracellular chemical homeostasis	0.0002897	0.008641	118	886
Cluster3	GO:0002831	regulation of response to biotic stimulus	0.0003142	0.009342	88	627
Cluster3	GO:0019725	cellular homeostasis	0.0003168	0.009389	133	1021
Cluster3	GO:0032388	positive regulation of intracellular transport	0.0003254	0.009617	40	234
Cluster3	GO:1900181	negative regulation of protein localization to nucleus	0.0003277	0.009655	13	46
Cluster3	GO:0070918	regulatory ncRNA processing	0.0003301	0.009697	19	83
Cluster3	GO:0051222	positive regulation of protein transport	0.0003494	0.01023	60	394
Cluster3	GO:1900037	regulation of cellular response to hypoxia	0.0003699	0.01077	10	30
Cluster3	GO:0010866	regulation of triglyceride biosynthetic process	0.0003699	0.01077	10	30
Cluster3	GO:0072378	blood coagulation, fibrin clot formation	0.0003786	0.01094	9	25
Cluster3	GO:0035461	vitamin transmembrane transport	0.0003786	0.01094	9	25
Cluster3	GO:1902222	erythrose 4-phosphate/phosphoenolpyruvate family amino acid catabolic process	0.0003839	0.01094	5	8
Cluster3	GO:1904823	purine nucleobase transmembrane transport	0.0003839	0.01094	5	8
Cluster3	GO:0006559	L-phenylalanine catabolic process	0.0003839	0.01094	5	8
Cluster3	GO:0006548	histidine catabolic process	0.0003839	0.01094	5	8
Cluster3	GO:1903298	negative regulation of hypoxia-induced intrinsic apoptotic signaling pathway	0.0003839	0.01094	5	8
Cluster3	GO:0031100	animal organ regeneration	0.0003845	0.01094	22	104
Cluster3	GO:0046364	monosaccharide biosynthetic process	0.000393	0.01115	26	132
Cluster3	GO:1902017	regulation of cilium assembly	0.0003961	0.0112	24	118
Cluster3	GO:0007249	canonical NF-kappaB signal transduction	0.0003996	0.01127	52	331
Cluster3	GO:0006778	porphyrin-containing compound metabolic process	0.0004025	0.01132	16	65
Cluster3	GO:1903052	positive regulation of proteolysis involved in protein catabolic process	0.0004138	0.0116	29	154
Cluster3	GO:0042593	glucose homeostasis	0.0004183	0.01161	56	364
Cluster3	GO:0030047	actin modification	0.0004188	0.01161	4	5
Cluster3	GO:0015854	guanine transport	0.0004188	0.01161	4	5
Cluster3	GO:0002541	activation of plasma proteins involved in acute inflammatory response	0.0004188	0.01161	4	5
Cluster3	GO:0009072	aromatic amino acid metabolic process	0.0004466	0.01231	11	36
Cluster3	GO:0010039	response to iron ion	0.0004466	0.01231	11	36
Cluster3	GO:0033500	carbohydrate homeostasis	0.0004481	0.01232	56	365
Cluster3	GO:0071363	cellular response to growth factor stimulus	0.0004536	0.01244	120	914
Cluster3	GO:0010035	response to inorganic substance	0.000459	0.01255	101	747
Cluster3	GO:0006575	cellular modified amino acid metabolic process	0.0004624	0.01261	29	155
Cluster3	GO:0042981	regulation of apoptotic process	0.0004701	0.01278	232	1939
Cluster3	GO:1990144	intrinsic apoptotic signaling pathway in response to hypoxia	0.0004724	0.01281	6	12
Cluster3	GO:0060322	head development	0.000492	0.01329	162	1294
Cluster3	GO:0009150	purine ribonucleotide metabolic process	0.000493	0.01329	63	424
Cluster3	GO:2001234	negative regulation of apoptotic signaling pathway	0.0004995	0.01343	46	286
Cluster3	GO:0062013	positive regulation of small molecule metabolic process	0.0005045	0.01353	34	193
Cluster3	GO:0031401	positive regulation of protein modification process	0.0005131	0.01372	146	1150
Cluster3	GO:0071383	cellular response to steroid hormone stimulus	0.0005145	0.01372	41	247
Cluster3	GO:0042789	mRNA transcription by RNA polymerase II	0.0005186	0.01379	14	54
Cluster3	GO:0072114	pronephros morphogenesis	0.0005292	0.014	9	26
Cluster3	GO:0006740	NADPH regeneration	0.0005292	0.014	9	26
Cluster3	GO:0071453	cellular response to oxygen levels	0.0005441	0.01435	36	209
Cluster3	GO:0009101	glycoprotein biosynthetic process	0.0005496	0.01446	56	368
Cluster3	GO:0072359	circulatory system development	0.0005739	0.01506	235	1974
Cluster3	GO:0090316	positive regulation of intracellular protein transport	0.0005862	0.01534	33	187
Cluster3	GO:0009299	mRNA transcription	0.0006115	0.01596	15	61
Cluster3	GO:0044242	cellular lipid catabolic process	0.0006152	0.01599	42	257
Cluster3	GO:0035601	protein deacylation	0.0006159	0.01599	27	143
Cluster3	GO:0006536	glutamate metabolic process	0.0006251	0.01619	12	43
Cluster3	GO:0051130	positive regulation of cellular component organization	0.0006309	0.01629	174	1411
Cluster3	GO:0072348	sulfur compound transport	0.0006339	0.01633	14	55
Cluster3	GO:0009064	glutamine family amino acid metabolic process	0.000642	0.0165	20	94
Cluster3	GO:0035264	multicellular organism growth	0.0006513	0.01669	40	242
Cluster3	GO:0043413	macromolecule glycosylation	0.000667	0.017	42	258
Cluster3	GO:0006486	protein glycosylation	0.000667	0.017	42	258
Cluster3	GO:0044270	cellular nitrogen compound catabolic process	0.0006686	0.017	82	590
Cluster3	GO:1900034	regulation of cellular response to heat	0.0006731	0.01707	7	17
Cluster3	GO:0098876	vesicle-mediated transport to the plasma membrane	0.0006802	0.01721	30	166
Cluster3	GO:0043067	regulation of programmed cell death	0.0006842	0.01727	237	1999
Cluster3	GO:0098732	macromolecule deacylation	0.0006888	0.01734	27	144
Cluster3	GO:0045834	positive regulation of lipid metabolic process	0.0006939	0.0174	35	204
Cluster3	GO:0048589	developmental growth	0.0006948	0.0174	142	1122
Cluster3	GO:1901361	organic cyclic compound catabolic process	0.0006979	0.01743	90	660
Cluster3	GO:0043549	regulation of kinase activity	0.0007217	0.01798	112	854
Cluster3	GO:0007417	central nervous system development	0.0007265	0.01806	198	1637
Cluster3	GO:0002218	activation of innate immune response	0.0007312	0.01813	46	291
Cluster3	GO:0006259	DNA metabolic process	0.0007342	0.01815	149	1187
Cluster3	GO:0042537	benzene-containing compound metabolic process	0.000745	0.01838	11	38
Cluster3	GO:0097193	intrinsic apoptotic signaling pathway	0.0007651	0.01882	56	373
Cluster3	GO:0002221	pattern recognition receptor signaling pathway	0.0007684	0.01886	40	244
Cluster3	GO:0090114	COPII-coated vesicle budding	0.0007841	0.01919	12	44
Cluster3	GO:1903297	regulation of hypoxia-induced intrinsic apoptotic signaling pathway	0.0007941	0.01939	5	9
Cluster3	GO:0010558	negative regulation of macromolecule biosynthetic process	0.0008218	0.02002	225	1893
Cluster3	GO:0031327	negative regulation of cellular biosynthetic process	0.0008297	0.02016	232	1959
Cluster3	GO:0015931	nucleobase-containing compound transport	0.0008336	0.02021	40	245
Cluster3	GO:0015849	organic acid transport	0.0008413	0.02034	61	416
Cluster3	GO:0072376	protein activation cascade	0.000868	0.02094	10	33
Cluster3	GO:0051338	regulation of transferase activity	0.0008818	0.02122	128	1002
Cluster3	GO:0006401	RNA catabolic process	0.0009111	0.02187	57	384
Cluster3	GO:0040029	epigenetic regulation of gene expression	0.0009146	0.0219	42	262
Cluster3	GO:0034440	lipid oxidation	0.0009178	0.02192	25	132
Cluster3	GO:0060562	epithelial tube morphogenesis	0.0009358	0.0223	81	588
Cluster3	GO:0019395	fatty acid oxidation	0.0009424	0.0224	24	125
Cluster3	GO:1902235	regulation of endoplasmic reticulum stress-induced intrinsic apoptotic signaling pathway	0.0009472	0.02241	11	39
Cluster3	GO:0043162	ubiquitin-dependent protein catabolic process via the multivesicular body sorting pathway	0.0009472	0.02241	11	39
Cluster3	GO:0006900	vesicle budding from membrane	0.0009578	0.02254	19	90
Cluster3	GO:0030177	positive regulation of Wnt signaling pathway	0.0009614	0.02254	31	177
Cluster3	GO:0007040	lysosome organization	0.0009619	0.02254	23	118
Cluster3	GO:0080171	lytic vacuole organization	0.0009619	0.02254	23	118
Cluster3	GO:0016578	histone deubiquitination	0.0009754	0.02271	12	45
Cluster3	GO:0035329	hippo signaling	0.0009754	0.02271	12	45
Cluster3	GO:0006397	mRNA processing	0.000978	0.02271	78	563
Cluster3	GO:0007507	heart development	0.0009783	0.02271	136	1077
Cluster3	GO:0070848	response to growth factor	0.0009865	0.02279	121	942
Cluster3	GO:0016072	rRNA metabolic process	0.0009881	0.02279	44	279
Cluster3	GO:0072330	monocarboxylic acid biosynthetic process	0.0009891	0.02279	43	271
Cluster3	GO:1901615	organic hydroxy compound metabolic process	0.001008	0.02315	89	659
Cluster3	GO:1903358	regulation of Golgi organization	0.001009	0.02315	7	18
Cluster3	GO:0048646	anatomical structure formation involved in morphogenesis	0.001016	0.02326	226	1910
Cluster3	GO:0002753	cytoplasmic pattern recognition receptor signaling pathway	0.001027	0.02336	25	133
Cluster3	GO:0008202	steroid metabolic process	0.001033	0.02336	57	386
Cluster3	GO:1903791	uracil transmembrane transport	0.001042	0.02336	3	3
Cluster3	GO:0035344	hypoxanthine transport	0.001042	0.02336	3	3
Cluster3	GO:1904082	pyrimidine nucleobase transmembrane transport	0.001042	0.02336	3	3
Cluster3	GO:0019676	ammonia assimilation cycle	0.001042	0.02336	3	3
Cluster3	GO:0015857	uracil transport	0.001042	0.02336	3	3
Cluster3	GO:1902236	negative regulation of endoplasmic reticulum stress-induced intrinsic apoptotic signaling pathway	0.001042	0.02336	8	23
Cluster3	GO:0006098	pentose-phosphate shunt	0.001042	0.02336	8	23
Cluster3	GO:0006354	DNA-templated transcription elongation	0.001061	0.02374	27	148
Cluster3	GO:0035239	tube morphogenesis	0.001077	0.02404	180	1483
Cluster3	GO:0046822	regulation of nucleocytoplasmic transport	0.001106	0.02463	26	141
Cluster3	GO:2000059	negative regulation of ubiquitin-dependent protein catabolic process	0.001118	0.0247	14	58
Cluster3	GO:0001881	receptor recycling	0.001118	0.0247	14	58
Cluster3	GO:1905039	carboxylic acid transmembrane transport	0.001119	0.0247	30	171
Cluster3	GO:0045088	regulation of innate immune response	0.00112	0.0247	70	497
Cluster3	GO:0035459	vesicle cargo loading	0.001123	0.02473	10	34
Cluster3	GO:0046503	glycerolipid catabolic process	0.001135	0.02492	16	71
Cluster3	GO:0002758	innate immune response-activating signaling pathway	0.00115	0.02516	42	265
Cluster3	GO:0046890	regulation of lipid biosynthetic process	0.00115	0.02516	42	265
Cluster3	GO:0006572	tyrosine catabolic process	0.001156	0.02517	4	6
Cluster3	GO:1904528	positive regulation of microtubule binding	0.001156	0.02517	4	6
Cluster3	GO:0072337	modified amino acid transport	0.001175	0.02552	13	52
Cluster3	GO:0009791	post-embryonic development	0.001178	0.02554	27	149
Cluster3	GO:0046700	heterocycle catabolic process	0.001198	0.02592	81	593
Cluster3	GO:0090148	membrane fission	0.001204	0.02598	12	46
Cluster3	GO:0034248	regulation of amide metabolic process	0.001213	0.02613	89	663
Cluster3	GO:1903825	organic acid transmembrane transport	0.001231	0.02641	30	172
Cluster3	GO:0046942	carboxylic acid transport	0.001232	0.02641	60	414
Cluster3	GO:0006110	regulation of glycolytic process	0.001239	0.02649	15	65
Cluster3	GO:0002224	toll-like receptor signaling pathway	0.001241	0.02649	18	85
Cluster3	GO:0006402	mRNA catabolic process	0.001259	0.02682	49	323
Cluster3	GO:2001233	regulation of apoptotic signaling pathway	0.001287	0.02736	67	474
Cluster3	GO:0042730	fibrinolysis	0.001296	0.02742	9	29
Cluster3	GO:0032469	endoplasmic reticulum calcium ion homeostasis	0.001296	0.02742	9	29
Cluster3	GO:0006417	regulation of translation	0.001321	0.02789	81	595
Cluster3	GO:0046460	neutral lipid biosynthetic process	0.001336	0.0281	14	59
Cluster3	GO:0046463	acylglycerol biosynthetic process	0.001336	0.0281	14	59
Cluster3	GO:0120035	regulation of plasma membrane bounded cell projection organization	0.001395	0.02927	118	924
Cluster3	GO:0045022	early endosome to late endosome transport	0.001419	0.02972	13	53
Cluster3	GO:0022613	ribonucleoprotein complex biogenesis	0.00143	0.02982	74	536
Cluster3	GO:0090042	tubulin deacetylation	0.00143	0.02982	8	24
Cluster3	GO:0051248	negative regulation of protein metabolic process	0.001441	0.02989	162	1326
Cluster3	GO:0006897	endocytosis	0.001445	0.02989	113	880
Cluster3	GO:1902221	erythrose 4-phosphate/phosphoenolpyruvate family amino acid metabolic process	0.001461	0.02989	5	10
Cluster3	GO:0006558	L-phenylalanine metabolic process	0.001461	0.02989	5	10
Cluster3	GO:0032025	response to cobalt ion	0.001461	0.02989	5	10
Cluster3	GO:0034727	piecemeal microautophagy of the nucleus	0.001461	0.02989	5	10
Cluster3	GO:0098760	response to interleukin-7	0.001464	0.02989	7	19
Cluster3	GO:0098761	cellular response to interleukin-7	0.001464	0.02989	7	19
Cluster3	GO:0032897	negative regulation of viral transcription	0.001464	0.02989	7	19
Cluster3	GO:0044804	nucleophagy	0.001464	0.02989	7	19
Cluster3	GO:0006633	fatty acid biosynthetic process	0.001469	0.02993	33	197
Cluster3	GO:0032535	regulation of cellular component size	0.001476	0.03002	66	468
Cluster3	GO:0034250	positive regulation of amide metabolic process	0.001496	0.03036	34	205
Cluster3	GO:0010810	regulation of cell-substrate adhesion	0.001553	0.03145	41	261
Cluster3	GO:0034655	nucleobase-containing compound catabolic process	0.001581	0.03195	74	538
Cluster3	GO:0043687	post-translational protein modification	0.001608	0.03244	17	80
Cluster3	GO:0002009	morphogenesis of an epithelium	0.001615	0.03249	123	973
Cluster3	GO:0043123	positive regulation of canonical NF-kappaB signal transduction	0.001627	0.03268	34	206
Cluster3	GO:0006476	protein deacetylation	0.001655	0.03316	24	130
Cluster3	GO:0006282	regulation of DNA repair	0.001673	0.03346	37	230
Cluster3	GO:1903573	negative regulation of response to endoplasmic reticulum stress	0.001705	0.03403	13	54
Cluster3	GO:0007420	brain development	0.001717	0.0342	150	1221
Cluster3	GO:0033673	negative regulation of kinase activity	0.001772	0.03523	43	279
Cluster3	GO:0090066	regulation of anatomical structure size	0.001804	0.03579	88	663
Cluster3	GO:0002521	leukocyte differentiation	0.001817	0.03584	108	841
Cluster3	GO:0050820	positive regulation of coagulation	0.001818	0.03584	10	36
Cluster3	GO:0000289	nuclear-transcribed mRNA poly(A) tail shortening	0.001818	0.03584	10	36
Cluster3	GO:0043401	steroid hormone mediated signaling pathway	0.001836	0.03614	28	161
Cluster3	GO:0016485	protein processing	0.001866	0.03657	49	329
Cluster3	GO:0036294	cellular response to decreased oxygen levels	0.001867	0.03657	32	192
Cluster3	GO:0034340	response to type I interferon	0.001876	0.03657	19	95
Cluster3	GO:1902117	positive regulation of organelle assembly	0.001876	0.03657	19	95
Cluster3	GO:0032456	endocytic recycling	0.001876	0.03657	19	95
Cluster3	GO:0031344	regulation of cell projection organization	0.001883	0.03662	119	941
Cluster3	GO:0097502	mannosylation	0.001925	0.03737	8	25
Cluster3	GO:0030323	respiratory tube development	0.001933	0.03744	41	264
Cluster3	GO:0036293	response to decreased oxygen levels	0.001942	0.03754	58	405
Cluster3	GO:0006983	ER overload response	0.001978	0.03816	6	15
Cluster3	GO:0090090	negative regulation of canonical Wnt signaling pathway	0.002018	0.03886	28	162
Cluster3	GO:0008380	RNA splicing	0.002023	0.03889	71	517
Cluster3	GO:0009268	response to pH	0.002036	0.03899	13	55
Cluster3	GO:0032008	positive regulation of TOR signaling	0.002036	0.03899	13	55
Cluster3	GO:0001666	response to hypoxia	0.002043	0.03905	56	389
Cluster3	GO:0051345	positive regulation of hydrolase activity	0.002058	0.03907	88	666
Cluster3	GO:0000278	mitotic cell cycle	0.002059	0.03907	135	1089
Cluster3	GO:0071243	cellular response to arsenic-containing substance	0.002064	0.03907	7	20
Cluster3	GO:0043984	histone H4-K16 acetylation	0.002064	0.03907	7	20
Cluster3	GO:0010867	positive regulation of triglyceride biosynthetic process	0.002064	0.03907	7	20
Cluster3	GO:0006694	steroid biosynthetic process	0.002084	0.03936	34	209
Cluster3	GO:0006839	mitochondrial transport	0.002107	0.03972	36	225
Cluster3	GO:0042306	regulation of protein import into nucleus	0.00213	0.04008	17	82
Cluster3	GO:0043254	regulation of protein-containing complex assembly	0.002158	0.04048	69	501
Cluster3	GO:0032606	type I interferon production	0.002163	0.04048	25	140
Cluster3	GO:0042254	ribosome biogenesis	0.002163	0.04048	51	348
Cluster3	GO:0032728	positive regulation of interferon-beta production	0.002169	0.04051	12	49
Cluster3	GO:0051726	regulation of cell cycle	0.002174	0.04052	165	1367
Cluster3	GO:0071467	cellular response to pH	0.002181	0.04057	9	31
Cluster3	GO:1905898	positive regulation of response to endoplasmic reticulum stress	0.002259	0.04194	11	43
Cluster3	GO:0010821	regulation of mitochondrion organization	0.002277	0.04221	29	171
Cluster3	GO:0001932	regulation of protein phosphorylation	0.002318	0.04288	157	1295
Cluster3	GO:0009161	ribonucleoside monophosphate metabolic process	0.002336	0.04313	15	69
Cluster3	GO:0048814	regulation of dendrite morphogenesis	0.002362	0.04354	20	104
Cluster3	GO:0033013	tetrapyrrole metabolic process	0.002408	0.0443	16	76
Cluster3	GO:0098927	vesicle-mediated transport between endosomal compartments	0.002419	0.04441	13	56
Cluster3	GO:0010562	positive regulation of phosphorus metabolic process	0.002436	0.04453	128	1030
Cluster3	GO:0045937	positive regulation of phosphate metabolic process	0.002436	0.04453	128	1030
Cluster3	GO:0071357	cellular response to type I interferon	0.002439	0.04453	18	90
Cluster3	GO:1901033	positive regulation of response to reactive oxygen species	0.002463	0.04456	5	11
Cluster3	GO:0044829	positive regulation by host of viral genome replication	0.002463	0.04456	5	11
Cluster3	GO:1900119	positive regulation of execution phase of apoptosis	0.002463	0.04456	5	11
Cluster3	GO:0070189	kynurenine metabolic process	0.002463	0.04456	5	11
Cluster3	GO:0046501	protoporphyrinogen IX metabolic process	0.002463	0.04456	5	11
Cluster3	GO:1901525	negative regulation of mitophagy	0.002488	0.04463	4	7
Cluster3	GO:0060440	trachea formation	0.002488	0.04463	4	7
Cluster3	GO:1903003	positive regulation of protein deubiquitination	0.002488	0.04463	4	7
Cluster3	GO:0015855	pyrimidine nucleobase transport	0.002488	0.04463	4	7
Cluster3	GO:0009411	response to UV	0.00249	0.04463	29	172
Cluster3	GO:0048729	tissue morphogenesis	0.002528	0.04524	140	1141
Cluster3	GO:1903798	regulation of miRNA processing	0.002546	0.0453	8	26
Cluster3	GO:0046782	regulation of viral transcription	0.002546	0.0453	8	26
Cluster3	GO:0051788	response to misfolded protein	0.002546	0.0453	8	26
Cluster3	GO:0071407	cellular response to organic cyclic compound	0.002553	0.04535	88	671
Cluster3	GO:0060173	limb development	0.002562	0.04543	41	268
Cluster3	GO:0045995	regulation of embryonic development	0.002574	0.04556	21	112
Cluster3	GO:0009615	response to virus	0.002587	0.04565	71	522
Cluster3	GO:0030324	lung development	0.002588	0.04565	40	260
Cluster3	GO:1902074	response to salt	0.002627	0.04623	66	479
Cluster3	GO:0048736	appendage development	0.002631	0.04623	44	293
Cluster3	GO:0019058	viral life cycle	0.002637	0.04626	55	385
Cluster3	GO:0009887	animal organ morphogenesis	0.002661	0.0466	202	1720
Cluster3	GO:0072001	renal system development	0.002753	0.04812	72	532
Cluster3	GO:0033059	cellular pigmentation	0.002768	0.04816	18	91
Cluster3	GO:0006515	protein quality control for misfolded or incompletely synthesized proteins	0.002775	0.04816	9	32
Cluster3	GO:0099022	vesicle tethering	0.002775	0.04816	9	32
Cluster3	GO:0045722	positive regulation of gluconeogenesis	0.002775	0.04816	9	32
Cluster3	GO:0008333	endosome to lysosome transport	0.002787	0.04827	17	84
Cluster3	GO:0051052	regulation of DNA metabolic process	0.002791	0.04827	82	620
Cluster3	GO:0009156	ribonucleoside monophosphate biosynthetic process	0.002823	0.04866	10	38
Cluster3	GO:0036498	IRE1-mediated unfolded protein response	0.002838	0.04866	7	21
Cluster3	GO:0001845	phagolysosome assembly	0.002838	0.04866	7	21
Cluster3	GO:2000641	regulation of early endosome to late endosome transport	0.002838	0.04866	7	21
Cluster3	GO:0045945	positive regulation of transcription by RNA polymerase III	0.002838	0.04866	7	21
Cluster3	GO:0015980	energy derivation by oxidation of organic compounds	0.002871	0.04914	56	395
Cluster3	GO:0032784	regulation of DNA-templated transcription elongation	0.002877	0.04915	21	113
Cluster3	GO:0090110	COPII-coated vesicle cargo loading	0.002905	0.04937	6	16
Cluster3	GO:0039022	pronephric duct development	0.002905	0.04937	6	16
Cluster3	GO:0014010	Schwann cell proliferation	0.002905	0.04937	6	16
Cluster4	GO:0006412	translation	3.174e-12	1.285e-08	87	932
Cluster4	GO:0009451	RNA modification	3.924e-12	1.285e-08	33	189
Cluster4	GO:0043043	peptide biosynthetic process	9.326e-12	2.036e-08	88	967
Cluster4	GO:0006518	peptide metabolic process	1.532e-11	2.509e-08	96	1107
Cluster4	GO:0043604	amide biosynthetic process	5.239e-11	6.864e-08	95	1115
Cluster4	GO:0008033	tRNA processing	1.324e-10	1.446e-07	26	138
Cluster4	GO:0043603	amide metabolic process	1.153e-09	1.079e-06	110	1445
Cluster4	GO:0006400	tRNA modification	2.881e-09	2.359e-06	20	96
Cluster4	GO:0065003	protein-containing complex assembly	4.037e-09	2.938e-06	133	1901
Cluster4	GO:0002181	cytoplasmic translation	4.581e-09	3.001e-06	27	173
Cluster4	GO:0140053	mitochondrial gene expression	7.604e-09	4.529e-06	27	177
Cluster4	GO:0001510	RNA methylation	1.455e-08	7.78e-06	19	95
Cluster4	GO:0032543	mitochondrial translation	1.544e-08	7.78e-06	23	137
Cluster4	GO:0140236	translation at presynapse	2.793e-08	1.307e-05	14	53
Cluster4	GO:0140241	translation at synapse	3.625e-08	1.475e-05	14	54
Cluster4	GO:0140242	translation at postsynapse	3.625e-08	1.475e-05	14	54
Cluster4	GO:0006399	tRNA metabolic process	3.828e-08	1.475e-05	28	203
Cluster4	GO:0022613	ribonucleoprotein complex biogenesis	1.082e-05	0.003939	45	536
Cluster4	GO:0030488	tRNA methylation	1.185e-05	0.004085	10	44
Cluster4	GO:0042273	ribosomal large subunit biogenesis	1.44e-05	0.004508	13	75
Cluster4	GO:0006119	oxidative phosphorylation	1.445e-05	0.004508	21	173
Cluster4	GO:0007005	mitochondrion organization	2.383e-05	0.007097	50	639
Cluster4	GO:0034470	ncRNA processing	2.743e-05	0.007812	39	456
Cluster4	GO:0006974	DNA damage response	6.446e-05	0.01759	66	955
Cluster4	GO:0042775	mitochondrial ATP synthesis coupled electron transport	7.668e-05	0.02009	15	112
Cluster4	GO:0019646	aerobic electron transport chain	8.094e-05	0.02039	14	100
Cluster4	GO:0042773	ATP synthesis coupled electron transport	8.501e-05	0.02063	15	113
Cluster4	GO:0022618	protein-RNA complex assembly	9.014e-05	0.02075	25	255
Cluster4	GO:0006413	translational initiation	9.185e-05	0.02075	17	140
Cluster4	GO:0002097	tRNA wobble base modification	0.0001323	0.02889	6	20
Cluster4	GO:0071826	protein-RNA complex organization	0.0001472	0.03068	25	263
Cluster4	GO:0006397	mRNA processing	0.0001498	0.03068	43	563
Cluster4	GO:0009081	branched-chain amino acid metabolic process	0.0001649	0.03172	7	29
Cluster4	GO:0000027	ribosomal large subunit assembly	0.0001649	0.03172	7	29
Cluster4	GO:0006414	translational elongation	0.0001695	0.03172	14	107
Cluster4	GO:0009083	branched-chain amino acid catabolic process	0.0002368	0.04172	6	22
Cluster4	GO:0070525	tRNA threonylcarbamoyladenosine metabolic process	0.0002368	0.04172	6	22
Cluster4	GO:0009060	aerobic respiration	0.000242	0.04172	22	225
Cluster4	GO:0006367	transcription initiation at RNA polymerase II promoter	0.000266	0.04466	15	125
Cluster4	GO:0022904	respiratory electron transport chain	0.0002727	0.04466	16	139
Cluster5	GO:0002181	cytoplasmic translation	1.131e-36	8.807e-33	68	173
Cluster5	GO:0140236	translation at presynapse	5.513e-24	2.147e-20	31	53
Cluster5	GO:0140241	translation at synapse	1.217e-23	2.369e-20	31	54
Cluster5	GO:0140242	translation at postsynapse	1.217e-23	2.369e-20	31	54
Cluster5	GO:0043604	amide biosynthetic process	3.098e-21	4.826e-18	155	1115
Cluster5	GO:0043043	peptide biosynthetic process	7.841e-21	1.018e-17	140	967
Cluster5	GO:0006412	translation	1.465e-20	1.63e-17	136	932
Cluster5	GO:0042254	ribosome biogenesis	4.374e-20	4.258e-17	73	348
Cluster5	GO:0022613	ribonucleoprotein complex biogenesis	9.732e-19	8.422e-16	92	536
Cluster5	GO:0006518	peptide metabolic process	2.597e-18	2.022e-15	147	1107
Cluster5	GO:0007005	mitochondrion organization	7.231e-18	5.12e-15	101	639
Cluster5	GO:0043603	amide metabolic process	7.023e-17	4.558e-14	173	1445
Cluster5	GO:0032543	mitochondrial translation	9.429e-17	5.649e-14	40	137
Cluster5	GO:0033108	mitochondrial respiratory chain complex assembly	2.942e-16	1.637e-13	35	109
Cluster5	GO:0042274	ribosomal small subunit biogenesis	1.408e-15	7.31e-13	35	114
Cluster5	GO:0140053	mitochondrial gene expression	2.002e-15	9.743e-13	44	177
Cluster5	GO:0006364	rRNA processing	2.699e-12	1.236e-09	46	231
Cluster5	GO:0042775	mitochondrial ATP synthesis coupled electron transport	7.517e-12	3.252e-09	30	112
Cluster5	GO:0042773	ATP synthesis coupled electron transport	9.624e-12	3.945e-09	30	113
Cluster5	GO:0032981	mitochondrial respiratory chain complex I assembly	5.938e-11	2.202e-08	22	67
Cluster5	GO:0010257	NADH dehydrogenase complex assembly	5.938e-11	2.202e-08	22	67
Cluster5	GO:0019646	aerobic electron transport chain	6.82e-11	2.414e-08	27	100
Cluster5	GO:0000028	ribosomal small subunit assembly	1.381e-10	4.676e-08	14	27
Cluster5	GO:0065003	protein-containing complex assembly	5.805e-10	1.884e-07	186	1901
Cluster5	GO:0016072	rRNA metabolic process	6.395e-10	1.992e-07	47	279
Cluster5	GO:0006119	oxidative phosphorylation	6.968e-10	2.087e-07	35	173
Cluster5	GO:0022904	respiratory electron transport chain	2.294e-09	6.616e-07	30	139
Cluster5	GO:0009060	aerobic respiration	2.426e-09	6.746e-07	40	225
Cluster5	GO:0042255	ribosome assembly	4.3e-09	1.155e-06	21	75
Cluster5	GO:0071826	protein-RNA complex organization	8.584e-09	2.228e-06	43	263
Cluster5	GO:0006626	protein targeting to mitochondrion	9.508e-09	2.389e-06	26	115
Cluster5	GO:0045333	cellular respiration	1.308e-08	3.184e-06	45	286
Cluster5	GO:0006120	mitochondrial electron transport, NADH to ubiquinone	1.839e-08	4.34e-06	17	54
Cluster5	GO:0006839	mitochondrial transport	2.561e-08	5.865e-06	38	225
Cluster5	GO:0022618	protein-RNA complex assembly	3.084e-08	6.862e-06	41	255
Cluster5	GO:0030150	protein import into mitochondrial matrix	1.005e-07	2.173e-05	10	20
Cluster5	GO:0070585	protein localization to mitochondrion	1.144e-07	2.407e-05	28	146
Cluster5	GO:0072655	establishment of protein localization to mitochondrion	1.25e-07	2.562e-05	27	138
Cluster5	GO:0015980	energy derivation by oxidation of organic compounds	4.023e-07	8.033e-05	52	395
Cluster5	GO:0034470	ncRNA processing	6.37e-07	0.000124	57	456
Cluster5	GO:0017004	cytochrome complex assembly	1.47e-06	0.0002726	13	43
Cluster5	GO:1990542	mitochondrial transmembrane transport	1.47e-06	0.0002726	13	43
Cluster5	GO:0009141	nucleoside triphosphate metabolic process	1.589e-06	0.0002877	34	223
Cluster5	GO:0065002	intracellular protein transmembrane transport	2.112e-06	0.0003739	15	58
Cluster5	GO:0071806	protein transmembrane transport	2.196e-06	0.0003801	17	73
Cluster5	GO:0022900	electron transport chain	2.301e-06	0.0003896	31	197
Cluster5	GO:0019693	ribose phosphate metabolic process	3.019e-06	0.0004915	55	456
Cluster5	GO:0044743	protein transmembrane import into intracellular organelle	3.029e-06	0.0004915	12	39
Cluster5	GO:0009142	nucleoside triphosphate biosynthetic process	3.972e-06	0.0006313	26	154
Cluster5	GO:0015031	protein transport	4.512e-06	0.0007028	165	1867
Cluster5	GO:0042776	proton motive force-driven mitochondrial ATP synthesis	5.631e-06	0.0008599	16	70
Cluster5	GO:0009165	nucleotide biosynthetic process	6.051e-06	0.0009063	43	332
Cluster5	GO:1901293	nucleoside phosphate biosynthetic process	6.534e-06	0.0009601	43	333
Cluster5	GO:0046390	ribose phosphate biosynthetic process	7.355e-06	0.001058	37	270
Cluster5	GO:0009259	ribonucleotide metabolic process	7.471e-06	0.001058	53	447
Cluster5	GO:0006753	nucleoside phosphate metabolic process	8.129e-06	0.00113	67	613
Cluster5	GO:0009260	ribonucleotide biosynthetic process	9.973e-06	0.001355	36	263
Cluster5	GO:0009117	nucleotide metabolic process	1.009e-05	0.001355	66	605
Cluster5	GO:1904667	negative regulation of ubiquitin protein ligase activity	1.056e-05	0.001394	6	10
Cluster5	GO:0009199	ribonucleoside triphosphate metabolic process	1.202e-05	0.00156	30	203
Cluster5	GO:0042273	ribosomal large subunit biogenesis	1.44e-05	0.001838	16	75
Cluster5	GO:0009150	purine ribonucleotide metabolic process	1.556e-05	0.001954	50	424
Cluster5	GO:0008535	respiratory chain complex IV assembly	1.744e-05	0.002156	10	32
Cluster5	GO:0033617	mitochondrial cytochrome c oxidase assembly	1.819e-05	0.002214	9	26
Cluster5	GO:0055086	nucleobase-containing small molecule metabolic process	2.355e-05	0.002822	72	695
Cluster5	GO:0015986	proton motive force-driven ATP synthesis	2.421e-05	0.002857	16	78
Cluster5	GO:0045184	establishment of protein localization	2.8e-05	0.003225	170	1998
Cluster5	GO:0006163	purine nucleotide metabolic process	2.816e-05	0.003225	59	540
Cluster5	GO:0009144	purine nucleoside triphosphate metabolic process	2.902e-05	0.003276	29	202
Cluster5	GO:0009201	ribonucleoside triphosphate biosynthetic process	3.14e-05	0.003494	23	143
Cluster5	GO:0009152	purine ribonucleotide biosynthetic process	3.777e-05	0.004143	33	247
Cluster5	GO:1901798	positive regulation of signal transduction by p53 class mediator	4.171e-05	0.004512	10	35
Cluster5	GO:0009205	purine ribonucleoside triphosphate metabolic process	4.328e-05	0.004618	28	196
Cluster5	GO:0045116	protein neddylation	4.908e-05	0.005165	9	29
Cluster5	GO:0006164	purine nucleotide biosynthetic process	5.286e-05	0.005489	37	295
Cluster5	GO:0072521	purine-containing compound metabolic process	5.463e-05	0.005598	61	577
Cluster5	GO:0046034	ATP metabolic process	5.536e-05	0.0056	25	168
Cluster5	GO:0072594	establishment of protein localization to organelle	5.971e-05	0.005961	56	518
Cluster5	GO:0006413	translational initiation	6.637e-05	0.006543	22	140
Cluster5	GO:0006091	generation of precursor metabolites and energy	6.985e-05	0.0068	56	521
Cluster5	GO:0031397	negative regulation of protein ubiquitination	7.434e-05	0.007108	17	94
Cluster5	GO:2000435	negative regulation of protein neddylation	7.526e-05	0.007108	4	5
Cluster5	GO:0034660	ncRNA metabolic process	7.584e-05	0.007108	67	658
Cluster5	GO:0006754	ATP biosynthetic process	7.667e-05	0.007108	20	122
Cluster5	GO:1990868	response to chemokine	8.391e-05	0.007555	18	104
Cluster5	GO:1990869	cellular response to chemokine	8.391e-05	0.007555	18	104
Cluster5	GO:0045730	respiratory burst	8.44e-05	0.007555	11	45
Cluster5	GO:0016226	iron-sulfur cluster assembly	8.808e-05	0.007708	9	31
Cluster5	GO:0031163	metallo-sulfur cluster assembly	8.808e-05	0.007708	9	31
Cluster5	GO:0051204	protein insertion into mitochondrial membrane	9.029e-05	0.007813	10	38
Cluster5	GO:0072522	purine-containing compound biosynthetic process	9.959e-05	0.008523	37	304
Cluster5	GO:0090199	regulation of release of cytochrome c from mitochondria	0.0001101	0.009318	12	54
Cluster5	GO:0051603	proteolysis involved in protein catabolic process	0.0001167	0.009772	83	872
Cluster5	GO:1903321	negative regulation of protein modification by small protein conjugation or removal	0.0001225	0.01015	18	107
Cluster5	GO:0043632	modification-dependent macromolecule catabolic process	0.0001369	0.01122	75	773
Cluster5	GO:0009206	purine ribonucleoside triphosphate biosynthetic process	0.0001384	0.01123	21	137
Cluster5	GO:0009145	purine nucleoside triphosphate biosynthetic process	0.0001537	0.01234	21	138
Cluster5	GO:0051123	RNA polymerase II preinitiation complex assembly	0.0001647	0.01301	14	73
Cluster5	GO:0006605	protein targeting	0.0001654	0.01301	45	405
Cluster5	GO:0006886	intracellular protein transport	0.0001673	0.01303	94	1026
Cluster5	GO:0002183	cytoplasmic translational initiation	0.0001801	0.01388	10	41
Cluster5	GO:0045040	protein insertion into mitochondrial outer membrane	0.0001912	0.0146	6	15
Cluster5	GO:0046907	intracellular transport	0.0002084	0.01576	153	1838
Cluster5	GO:0008215	spermine metabolic process	0.0002142	0.01604	4	6
Cluster5	GO:0019941	modification-dependent protein catabolic process	0.0002356	0.01745	73	761
Cluster5	GO:0002429	immune response-activating cell surface receptor signaling pathway	0.0002376	0.01745	41	364
Cluster5	GO:0002768	immune response-regulating cell surface receptor signaling pathway	0.000243	0.01768	44	400
Cluster5	GO:0070098	chemokine-mediated signaling pathway	0.0002491	0.01796	16	94
Cluster5	GO:0070972	protein localization to endoplasmic reticulum	0.0002823	0.01996	16	95
Cluster5	GO:0097428	protein maturation by iron-sulfur cluster transfer	0.0002896	0.01996	6	16
Cluster5	GO:0001732	formation of cytoplasmic translation initiation complex	0.0002896	0.01996	6	16
Cluster5	GO:0007008	outer mitochondrial membrane organization	0.0002896	0.01996	6	16
Cluster5	GO:2000501	regulation of natural killer cell chemotaxis	0.0002896	0.01996	6	16
Cluster5	GO:0090151	establishment of protein localization to mitochondrial membrane	0.0003352	0.0229	10	44
Cluster5	GO:0061179	negative regulation of insulin secretion involved in cellular response to glucose stimulus	0.0004237	0.0287	6	17
Cluster5	GO:0070897	transcription preinitiation complex assembly	0.0004293	0.02882	15	89
Cluster5	GO:0060261	positive regulation of transcription initiation by RNA polymerase II	0.0004481	0.02958	13	71
Cluster5	GO:0001836	release of cytochrome c from mitochondria	0.0004481	0.02958	13	71
Cluster5	GO:0030490	maturation of SSU-rRNA	0.0004719	0.03081	11	54
Cluster5	GO:0106035	protein maturation by [4Fe-4S] cluster transfer	0.0004748	0.03081	4	7
Cluster5	GO:0007006	mitochondrial membrane organization	0.0005098	0.03254	20	140
Cluster5	GO:0008637	apoptotic mitochondrial changes	0.0005098	0.03254	20	140
Cluster5	GO:0090200	positive regulation of release of cytochrome c from mitochondria	0.0005278	0.03342	8	31
Cluster5	GO:0032968	positive regulation of transcription elongation by RNA polymerase II	0.0005566	0.03496	11	55
Cluster5	GO:0060260	regulation of transcription initiation by RNA polymerase II	0.0005764	0.03591	14	82
Cluster5	GO:0035747	natural killer cell chemotaxis	0.0006018	0.0372	6	18
Cluster5	GO:0006511	ubiquitin-dependent protein catabolic process	0.0007245	0.04443	70	752
Cluster5	GO:0046649	lymphocyte activation	0.0007409	0.04508	89	1005
Cluster5	GO:0032786	positive regulation of DNA-templated transcription, elongation	0.0007841	0.04734	12	66
Cluster6	GO:0046907	intracellular transport	2.808e-12	2.334e-08	190	1838
Cluster6	GO:1902680	positive regulation of RNA biosynthetic process	3.621e-11	1.024e-07	191	1905
Cluster6	GO:0006397	mRNA processing	4.081e-11	1.024e-07	78	563
Cluster6	GO:0045893	positive regulation of DNA-templated transcription	4.926e-11	1.024e-07	190	1899
Cluster6	GO:0022613	ribonucleoprotein complex biogenesis	1.537e-10	2.356e-07	74	536
Cluster6	GO:0016570	histone modification	2.2e-10	2.356e-07	63	426
Cluster6	GO:0045184	establishment of protein localization	2.218e-10	2.356e-07	195	1998
Cluster6	GO:0033365	protein localization to organelle	2.267e-10	2.356e-07	122	1085
Cluster6	GO:0016071	mRNA metabolic process	4.691e-10	4.333e-07	104	885
Cluster6	GO:0015031	protein transport	6.295e-10	5.233e-07	183	1867
Cluster6	GO:0006913	nucleocytoplasmic transport	8.423e-10	6.366e-07	57	379
Cluster6	GO:0051169	nuclear transport	9.318e-10	6.455e-07	57	380
Cluster6	GO:0006886	intracellular protein transport	1.851e-09	1.184e-06	114	1026
Cluster6	GO:0009894	regulation of catabolic process	2.349e-09	1.395e-06	130	1225
Cluster6	GO:0033043	regulation of organelle organization	1.992e-08	1.104e-05	140	1395
Cluster6	GO:0042254	ribosome biogenesis	4.14e-08	2.151e-05	50	348
Cluster6	GO:0018193	peptidyl-amino acid modification	7.215e-08	3.528e-05	127	1259
Cluster6	GO:0008380	RNA splicing	8e-08	3.695e-05	65	517
Cluster6	GO:0010498	proteasomal protein catabolic process	1.309e-07	5.728e-05	69	569
Cluster6	GO:0051168	nuclear export	4.361e-07	0.0001786	31	183
Cluster6	GO:0050684	regulation of mRNA processing	4.512e-07	0.0001786	30	174
Cluster6	GO:0071824	protein-DNA complex organization	6.792e-07	0.0002567	98	944
Cluster6	GO:0019080	viral gene expression	1.098e-06	0.0003967	23	118
Cluster6	GO:0016571	histone methylation	1.194e-06	0.0004135	25	136
Cluster6	GO:0043161	proteasome-mediated ubiquitin-dependent protein catabolic process	1.339e-06	0.0004321	59	490
Cluster6	GO:0061919	process utilizing autophagic mechanism	1.403e-06	0.0004321	72	642
Cluster6	GO:0006914	autophagy	1.403e-06	0.0004321	72	642
Cluster6	GO:0000375	RNA splicing, via transesterification reactions	1.757e-06	0.0005073	48	371
Cluster6	GO:0034660	ncRNA metabolic process	1.77e-06	0.0005073	73	658
Cluster6	GO:0010506	regulation of autophagy	2.032e-06	0.0005631	51	406
Cluster6	GO:0016072	rRNA metabolic process	2.491e-06	0.000668	39	279
Cluster6	GO:0009057	macromolecule catabolic process	2.768e-06	0.0007192	149	1639
Cluster6	GO:0006479	protein methylation	3.246e-06	0.0007757	29	181
Cluster6	GO:0008213	protein alkylation	3.246e-06	0.0007757	29	181
Cluster6	GO:0031056	regulation of histone modification	3.266e-06	0.0007757	27	162
Cluster6	GO:0006364	rRNA processing	3.435e-06	0.0007931	34	231
Cluster6	GO:0016241	regulation of macroautophagy	3.683e-06	0.0008275	27	163
Cluster6	GO:0043009	chordate embryonic development	4.33e-06	0.0009472	119	1255
Cluster6	GO:0007005	mitochondrion organization	4.489e-06	0.0009569	70	639
Cluster6	GO:0045934	negative regulation of nucleobase-containing compound metabolic process	4.737e-06	0.0009844	159	1790
Cluster6	GO:0022411	cellular component disassembly	4.932e-06	0.0009999	65	581
Cluster6	GO:0070647	protein modification by small protein conjugation or removal	5.576e-06	0.001104	106	1093
Cluster6	GO:0006325	chromatin organization	5.741e-06	0.00111	86	840
Cluster6	GO:0034470	ncRNA processing	6.098e-06	0.001152	54	456
Cluster6	GO:0009792	embryo development ending in birth or egg hatching	6.283e-06	0.001161	120	1278
Cluster6	GO:0000398	mRNA splicing, via spliceosome	6.738e-06	0.001192	46	367
Cluster6	GO:0000377	RNA splicing, via transesterification reactions with bulged adenosine as nucleophile	6.738e-06	0.001192	46	367
Cluster6	GO:0072594	establishment of protein localization to organelle	7.765e-06	0.001335	59	518
Cluster6	GO:0051603	proteolysis involved in protein catabolic process	7.872e-06	0.001335	88	872
Cluster6	GO:0018205	peptidyl-lysine modification	8.103e-06	0.001347	48	392
Cluster6	GO:0016192	vesicle-mediated transport	8.398e-06	0.001369	160	1822
Cluster6	GO:0051640	organelle localization	8.788e-06	0.001405	76	725
Cluster6	GO:0010256	endomembrane system organization	9.25e-06	0.001451	72	677
Cluster6	GO:0018210	peptidyl-threonine modification	1.037e-05	0.001571	23	134
Cluster6	GO:0051130	positive regulation of cellular component organization	1.039e-05	0.001571	129	1411
Cluster6	GO:0016236	macroautophagy	1.324e-05	0.001966	43	343
Cluster6	GO:0043632	modification-dependent macromolecule catabolic process	1.469e-05	0.002142	79	773
Cluster6	GO:0019941	modification-dependent protein catabolic process	1.501e-05	0.002152	78	761
Cluster6	GO:0045944	positive regulation of transcription by RNA polymerase II	1.56e-05	0.002198	129	1423
Cluster6	GO:0051668	localization within membrane	1.598e-05	0.002213	83	825
Cluster6	GO:0051253	negative regulation of RNA metabolic process	1.668e-05	0.002263	146	1654
Cluster6	GO:1903050	regulation of proteolysis involved in protein catabolic process	1.687e-05	0.002263	35	259
Cluster6	GO:0006511	ubiquitin-dependent protein catabolic process	1.762e-05	0.002325	77	752
Cluster6	GO:0044087	regulation of cellular component biogenesis	1.826e-05	0.002372	111	1189
Cluster6	GO:0016050	vesicle organization	1.991e-05	0.002527	49	417
Cluster6	GO:0051568	histone H3-K4 methylation	2.006e-05	0.002527	14	61
Cluster6	GO:1903311	regulation of mRNA metabolic process	2.056e-05	0.002552	48	406
Cluster6	GO:0010638	positive regulation of organelle organization	2.139e-05	0.002615	64	596
Cluster6	GO:0031329	regulation of cellular catabolic process	2.195e-05	0.002644	81	807
Cluster6	GO:0031344	regulation of cell projection organization	2.896e-05	0.00344	91	941
Cluster6	GO:0032446	protein modification by small protein conjugation	3.014e-05	0.003522	91	942
Cluster6	GO:0018107	peptidyl-threonine phosphorylation	3.05e-05	0.003522	21	124
Cluster6	GO:0043543	protein acylation	3.738e-05	0.004257	34	258
Cluster6	GO:0045892	negative regulation of DNA-templated transcription	3.928e-05	0.004364	132	1492
Cluster6	GO:0016032	viral process	3.938e-05	0.004364	56	511
Cluster6	GO:0006497	protein lipidation	4.203e-05	0.004597	18	99
Cluster6	GO:1902679	negative regulation of RNA biosynthetic process	4.37e-05	0.004718	133	1509
Cluster6	GO:0051247	positive regulation of protein metabolic process	4.648e-05	0.004917	147	1702
Cluster6	GO:0061136	regulation of proteasomal protein catabolic process	4.672e-05	0.004917	30	218
Cluster6	GO:0019083	viral transcription	5.131e-05	0.005332	14	66
Cluster6	GO:0034968	histone lysine methylation	5.533e-05	0.005678	18	101
Cluster6	GO:0006396	RNA processing	6.17e-05	0.006255	134	1534
Cluster6	GO:0006405	RNA export from nucleus	6.343e-05	0.006353	17	93
Cluster6	GO:0006488	dolichol-linked oligosaccharide biosynthetic process	7.233e-05	0.007158	8	24
Cluster6	GO:0006489	dolichyl diphosphate biosynthetic process	7.481e-05	0.007231	4	5
Cluster6	GO:0046465	dolichyl diphosphate metabolic process	7.481e-05	0.007231	4	5
Cluster6	GO:0006338	chromatin remodeling	7.713e-05	0.00737	70	697
Cluster6	GO:0034504	protein localization to nucleus	9.157e-05	0.00865	43	372
Cluster6	GO:0010970	transport along microtubule	9.861e-05	0.009211	27	195
Cluster6	GO:0006490	oligosaccharide-lipid intermediate biosynthetic process	0.0001005	0.009284	8	25
Cluster6	GO:0042158	lipoprotein biosynthetic process	0.0001061	0.009522	18	106
Cluster6	GO:0016567	protein ubiquitination	0.0001065	0.009522	82	858
Cluster6	GO:0007265	Ras protein signal transduction	0.000107	0.009522	45	398
Cluster6	GO:0016358	dendrite development	0.0001085	0.009522	40	340
Cluster6	GO:0030031	cell projection assembly	0.0001089	0.009522	78	807
Cluster6	GO:0120035	regulation of plasma membrane bounded cell projection organization	0.0001109	0.009522	87	924
Cluster6	GO:0030163	protein catabolic process	0.0001111	0.009522	106	1175
Cluster6	GO:0031062	positive regulation of histone methylation	0.0001132	0.009599	10	39
Cluster6	GO:0090023	positive regulation of neutrophil chemotaxis	0.0001144	0.009604	9	32
Cluster6	GO:0050821	protein stabilization	0.0001175	0.009765	31	240
Cluster6	GO:0098935	dendritic transport	0.0001202	0.00989	6	14
Cluster6	GO:0006487	protein N-linked glycosylation	0.000125	0.01009	15	80
Cluster6	GO:0030032	lamellipodium assembly	0.000125	0.01009	15	80
Cluster6	GO:0051646	mitochondrion localization	0.0001272	0.01017	13	63
Cluster6	GO:0019348	dolichol metabolic process	0.0001372	0.01086	8	26
Cluster6	GO:0031647	regulation of protein stability	0.0001457	0.01143	42	368
Cluster6	GO:0070849	response to epidermal growth factor	0.0001571	0.01221	12	56
Cluster6	GO:0120031	plasma membrane bounded cell projection assembly	0.0001602	0.01233	76	791
Cluster6	GO:0010558	negative regulation of macromolecule biosynthetic process	0.0001894	0.01441	157	1893
Cluster6	GO:0031848	protection from non-homologous end joining at telomere	0.0001907	0.01441	5	10
Cluster6	GO:0044248	cellular catabolic process	0.0001934	0.01449	150	1796
Cluster6	GO:0048193	Golgi vesicle transport	0.0001975	0.01466	39	338
Cluster6	GO:0072657	protein localization to membrane	0.0002057	0.01514	71	733
Cluster6	GO:0016255	attachment of GPI anchor to protein	0.000213	0.01541	4	6
Cluster6	GO:0006473	protein acetylation	0.0002138	0.01541	28	215
Cluster6	GO:0051656	establishment of organelle localization	0.0002151	0.01541	57	557
Cluster6	GO:0031124	mRNA 3'-end processing	0.0002185	0.01553	14	75
Cluster6	GO:0071496	cellular response to external stimulus	0.0002229	0.0157	45	411
Cluster6	GO:0051170	import into nucleus	0.0002285	0.01585	27	205
Cluster6	GO:0009896	positive regulation of catabolic process	0.0002289	0.01585	65	659
Cluster6	GO:0097581	lamellipodium organization	0.0002329	0.016	17	103
Cluster6	GO:0071624	positive regulation of granulocyte chemotaxis	0.0002426	0.01648	9	35
Cluster6	GO:0000466	maturation of 5.8S rRNA from tricistronic rRNA transcript (SSU-rRNA, 5.8S rRNA, LSU-rRNA)	0.0002438	0.01648	8	28
Cluster6	GO:0006508	proteolysis	0.0002463	0.01651	163	1988
Cluster6	GO:0018393	internal peptidyl-lysine acetylation	0.0002595	0.01718	23	164
Cluster6	GO:0040029	epigenetic regulation of gene expression	0.0002604	0.01718	32	262
Cluster6	GO:0006378	mRNA polyadenylation	0.0002644	0.01724	12	59
Cluster6	GO:0048598	embryonic morphogenesis	0.0002655	0.01724	105	1189
Cluster6	GO:0006851	mitochondrial calcium ion transmembrane transport	0.000287	0.0185	7	22
Cluster6	GO:0008654	phospholipid biosynthetic process	0.0002916	0.01865	33	275
Cluster6	GO:0006368	transcription elongation by RNA polymerase II	0.0003093	0.01954	19	125
Cluster6	GO:0006475	internal protein amino acid acetylation	0.0003103	0.01954	23	166
Cluster6	GO:0005996	monosaccharide metabolic process	0.0003277	0.02027	37	323
Cluster6	GO:0071364	cellular response to epidermal growth factor stimulus	0.00033	0.02027	11	52
Cluster6	GO:0140627	ubiquitin-dependent protein catabolic process via the C-end degron rule pathway	0.0003315	0.02027	5	11
Cluster6	GO:0007264	small GTPase mediated signal transduction	0.0003317	0.02027	56	554
Cluster6	GO:0010508	positive regulation of autophagy	0.0003388	0.02056	23	167
Cluster6	GO:0001841	neural tube formation	0.0003538	0.02131	22	157
Cluster6	GO:0046474	glycerophospholipid biosynthetic process	0.0003645	0.02174	28	222
Cluster6	GO:0051496	positive regulation of stress fiber assembly	0.0003662	0.02174	12	61
Cluster6	GO:0006096	glycolytic process	0.0003708	0.02186	17	107
Cluster6	GO:0051052	regulation of DNA metabolic process	0.0003763	0.02203	61	620
Cluster6	GO:0018394	peptidyl-lysine acetylation	0.0003812	0.02207	24	179
Cluster6	GO:0015931	nucleobase-containing compound transport	0.0003823	0.02207	30	245
Cluster6	GO:0051235	maintenance of location	0.0003989	0.02273	45	422
Cluster6	GO:0072595	maintenance of protein localization in organelle	0.0004019	0.02273	10	45
Cluster6	GO:0006354	DNA-templated transcription elongation	0.000402	0.02273	21	148
Cluster6	GO:0031440	regulation of mRNA 3'-end processing	0.0004101	0.02288	8	30
Cluster6	GO:0090312	positive regulation of protein deacetylation	0.0004101	0.02288	8	30
Cluster6	GO:0030705	cytoskeleton-dependent intracellular transport	0.0004169	0.02304	29	235
Cluster6	GO:0031399	regulation of protein modification process	0.0004187	0.02304	147	1785
Cluster6	GO:2000058	regulation of ubiquitin-dependent protein catabolic process	0.0004212	0.02304	25	191
Cluster6	GO:1901137	carbohydrate derivative biosynthetic process	0.0004302	0.02338	71	752
Cluster6	GO:0031327	negative regulation of cellular biosynthetic process	0.0004696	0.02499	159	1959
Cluster6	GO:0051654	establishment of mitochondrion localization	0.000472	0.02499	9	38
Cluster6	GO:1990116	ribosome-associated ubiquitin-dependent protein catabolic process	0.000472	0.02499	4	7
Cluster6	GO:0044528	regulation of mitochondrial mRNA stability	0.000472	0.02499	4	7
Cluster6	GO:0010639	negative regulation of organelle organization	0.0004888	0.0256	45	426
Cluster6	GO:0008361	regulation of cell size	0.0004897	0.0256	31	260
Cluster6	GO:0006090	pyruvate metabolic process	0.0005	0.02596	20	140
Cluster6	GO:0031503	protein-containing complex localization	0.0005028	0.02596	30	249
Cluster6	GO:0018022	peptidyl-lysine methylation	0.0005184	0.02632	18	120
Cluster6	GO:0006468	protein phosphorylation	0.0005198	0.02632	147	1794
Cluster6	GO:0007000	nucleolus organization	0.0005212	0.02632	7	24
Cluster6	GO:0016093	polyprenol metabolic process	0.0005224	0.02632	8	31
Cluster6	GO:1903829	positive regulation of protein localization	0.0005293	0.0265	58	590
Cluster6	GO:0007507	heart development	0.0005374	0.02675	95	1077
Cluster6	GO:0030038	contractile actin filament bundle assembly	0.0005647	0.02778	19	131
Cluster6	GO:0043149	stress fiber assembly	0.0005647	0.02778	19	131
Cluster6	GO:0001838	embryonic epithelial tube formation	0.000572	0.02797	24	184
Cluster6	GO:0000460	maturation of 5.8S rRNA	0.0005796	0.02807	9	39
Cluster6	GO:0032259	methylation	0.0005808	0.02807	43	405
Cluster6	GO:0071826	protein-RNA complex organization	0.0005956	0.02852	31	263
[truncated: 764 more rows]

## Sheet: Male_Biology_Process
Cluster	ID	Name	p-value	q-value FDR B&H	Hit Count in Query List	Hit Count in Genome
Cluster1	GO:0007059	chromosome segregation	1.27e-49	1.063e-45	143	465
Cluster1	GO:0022402	cell cycle process	2.718e-48	1.138e-44	275	1441
Cluster1	GO:0007049	cell cycle	1.44e-45	4.017e-42	332	1985
Cluster1	GO:1903047	mitotic cell cycle process	6.234e-45	1.304e-41	194	854
Cluster1	GO:0000278	mitotic cell cycle	1.127e-43	1.887e-40	213	1014
Cluster1	GO:0140014	mitotic nuclear division	8.942e-41	1.247e-37	106	316
Cluster1	GO:0000280	nuclear division	2.919e-39	3.49e-36	136	512
Cluster1	GO:0098813	nuclear chromosome segregation	1.794e-38	1.877e-35	110	356
Cluster1	GO:0048285	organelle fission	1.838e-37	1.709e-34	142	571
Cluster1	GO:0000070	mitotic sister chromatid segregation	5.839e-37	4.887e-34	82	212
Cluster1	GO:0000819	sister chromatid segregation	6.711e-37	5.106e-34	90	254
Cluster1	GO:0051276	chromosome organization	4.112e-36	2.868e-33	156	686
Cluster1	GO:0051301	cell division	1.992e-32	1.283e-29	151	697
Cluster1	GO:0010564	regulation of cell cycle process	2.724e-28	1.628e-25	162	845
Cluster1	GO:1905818	regulation of chromosome separation	2.83e-26	1.579e-23	42	79
Cluster1	GO:0051983	regulation of chromosome segregation	9.079e-26	4.749e-23	55	139
Cluster1	GO:0051726	regulation of cell cycle	1.282e-25	6.312e-23	204	1256
Cluster1	GO:0051304	chromosome separation	6.41e-25	2.98e-22	43	88
Cluster1	GO:0006259	DNA metabolic process	1.928e-23	8.491e-21	179	1081
Cluster1	GO:0044770	cell cycle phase transition	1.659e-22	6.941e-20	123	627
Cluster1	GO:0007088	regulation of mitotic nuclear division	3.365e-22	1.341e-19	50	134
Cluster1	GO:1901987	regulation of cell cycle phase transition	1.302e-21	4.947e-19	107	516
Cluster1	GO:0090068	positive regulation of cell cycle process	1.36e-21	4.947e-19	78	307
Cluster1	GO:0044772	mitotic cell cycle phase transition	1.441e-21	5.024e-19	106	509
Cluster1	GO:0006281	DNA repair	3.075e-21	1.029e-18	123	648
Cluster1	GO:0007346	regulation of mitotic cell cycle	4.138e-21	1.332e-18	116	594
Cluster1	GO:1902850	microtubule cytoskeleton organization involved in mitosis	6.583e-21	2.04e-18	58	187
Cluster1	GO:0051310	metaphase chromosome alignment	9.395e-21	2.808e-18	43	107
Cluster1	GO:0051306	mitotic sister chromatid separation	1.144e-20	3.203e-18	34	67
Cluster1	GO:1901990	regulation of mitotic cell cycle phase transition	1.148e-20	3.203e-18	90	402
Cluster1	GO:0010965	regulation of mitotic sister chromatid separation	2.205e-20	5.953e-18	33	64
Cluster1	GO:0006974	DNA damage response	4.119e-20	1.077e-17	157	959
Cluster1	GO:1905820	positive regulation of chromosome separation	9.085e-20	2.304e-17	23	31
Cluster1	GO:0050000	chromosome localization	1.916e-19	4.716e-17	46	130
Cluster1	GO:0006260	DNA replication	2.692e-19	6.437e-17	75	312
Cluster1	GO:0051303	establishment of chromosome localization	4.976e-19	1.157e-16	44	122
Cluster1	GO:0007010	cytoskeleton organization	1.03e-18	2.329e-16	226	1645
Cluster1	GO:0030071	regulation of mitotic metaphase/anaphase transition	2.032e-18	4.475e-16	38	95
Cluster1	GO:0007091	metaphase/anaphase transition of mitotic cell cycle	2.085e-18	4.475e-16	39	100
Cluster1	GO:0051783	regulation of nuclear division	2.426e-18	4.955e-16	52	172
Cluster1	GO:0006261	DNA-templated DNA replication	2.428e-18	4.955e-16	53	178
Cluster1	GO:0033045	regulation of sister chromatid segregation	2.899e-18	5.776e-16	41	111
Cluster1	GO:0008608	attachment of spindle microtubules to kinetochore	3.814e-18	7.423e-16	29	56
Cluster1	GO:0045787	positive regulation of cell cycle	4.033e-18	7.671e-16	86	407
Cluster1	GO:0044784	metaphase/anaphase transition of cell cycle	7.043e-18	1.308e-15	39	103
Cluster1	GO:1902099	regulation of metaphase/anaphase transition of cell cycle	7.187e-18	1.308e-15	38	98
Cluster1	GO:0000075	cell cycle checkpoint signaling	1.715e-17	3.054e-15	58	217
Cluster1	GO:0007051	spindle organization	1.921e-17	3.349e-15	59	224
Cluster1	GO:0033044	regulation of chromosome organization	2.796e-17	4.775e-15	65	266
Cluster1	GO:0007093	mitotic cell cycle checkpoint signaling	2.994e-17	5.012e-15	49	163
Cluster1	GO:0006302	double-strand break repair	3.742e-17	6.141e-15	73	324
Cluster1	GO:0007052	mitotic spindle organization	1.581e-16	2.545e-14	46	151
Cluster1	GO:0000226	microtubule cytoskeleton organization	3.695e-16	5.835e-14	120	720
Cluster1	GO:0031577	spindle checkpoint signaling	1.009e-15	1.564e-13	27	57
Cluster1	GO:0000086	G2/M transition of mitotic cell cycle	1.116e-15	1.699e-13	45	152
Cluster1	GO:0044839	cell cycle G2/M phase transition	1.279e-15	1.912e-13	48	171
Cluster1	GO:0033043	regulation of organelle organization	1.632e-15	2.395e-13	185	1342
Cluster1	GO:0051321	meiotic cell cycle	2.937e-15	4.237e-13	73	350
Cluster1	GO:0045839	negative regulation of mitotic nuclear division	3.862e-15	5.478e-13	28	64
Cluster1	GO:1903046	meiotic cell cycle process	9.13e-15	1.274e-12	61	268
Cluster1	GO:0051985	negative regulation of chromosome segregation	1.077e-14	1.478e-12	26	57
Cluster1	GO:0033048	negative regulation of mitotic sister chromatid segregation	1.32e-14	1.674e-12	25	53
Cluster1	GO:0033046	negative regulation of sister chromatid segregation	1.32e-14	1.674e-12	25	53
Cluster1	GO:0071174	mitotic spindle checkpoint signaling	1.32e-14	1.674e-12	25	53
Cluster1	GO:0045841	negative regulation of mitotic metaphase/anaphase transition	1.32e-14	1.674e-12	25	53
Cluster1	GO:2000816	negative regulation of mitotic sister chromatid separation	1.32e-14	1.674e-12	25	53
Cluster1	GO:1901988	negative regulation of cell cycle phase transition	2.673e-14	3.339e-12	66	311
Cluster1	GO:1902100	negative regulation of metaphase/anaphase transition of cell cycle	3.875e-14	4.7e-12	25	55
Cluster1	GO:1905819	negative regulation of chromosome separation	3.875e-14	4.7e-12	25	55
Cluster1	GO:0006310	DNA recombination	4.443e-14	5.312e-12	73	368
Cluster1	GO:0033047	regulation of mitotic sister chromatid segregation	4.908e-14	5.786e-12	26	60
Cluster1	GO:0000725	recombinational repair	5.912e-14	6.871e-12	49	194
Cluster1	GO:0000724	double-strand break repair via homologous recombination	6.864e-14	7.87e-12	48	188
Cluster1	GO:0045786	negative regulation of cell cycle	1.187e-13	1.342e-11	84	464
Cluster1	GO:1901989	positive regulation of cell cycle phase transition	1.579e-13	1.762e-11	40	140
Cluster1	GO:0010389	regulation of G2/M transition of mitotic cell cycle	1.63e-13	1.795e-11	36	116
Cluster1	GO:0010948	negative regulation of cell cycle process	1.783e-13	1.938e-11	71	362
Cluster1	GO:0051784	negative regulation of nuclear division	2.14e-13	2.296e-11	28	73
Cluster1	GO:1901992	positive regulation of mitotic cell cycle phase transition	2.183e-13	2.312e-11	36	117
Cluster1	GO:0045930	negative regulation of mitotic cell cycle	3.569e-13	3.689e-11	60	282
Cluster1	GO:2001251	negative regulation of chromosome organization	3.571e-13	3.689e-11	34	107
Cluster1	GO:0071173	spindle assembly checkpoint signaling	5.012e-13	5.054e-11	23	51
Cluster1	GO:0007094	mitotic spindle assembly checkpoint signaling	5.012e-13	5.054e-11	23	51
Cluster1	GO:1902749	regulation of cell cycle G2/M phase transition	1.879e-12	1.872e-10	37	131
Cluster1	GO:0051984	positive regulation of chromosome segregation	2.297e-12	2.261e-10	17	29
Cluster1	GO:0051225	spindle assembly	3.659e-12	3.561e-10	40	153
Cluster1	GO:0007080	mitotic metaphase chromosome alignment	3.846e-12	3.699e-10	25	65
Cluster1	GO:0045931	positive regulation of mitotic cell cycle	5.722e-12	5.442e-10	40	155
Cluster1	GO:1901970	positive regulation of mitotic sister chromatid separation	6.066e-12	5.704e-10	14	20
Cluster1	GO:1901991	negative regulation of mitotic cell cycle phase transition	7.621e-12	7.087e-10	49	219
Cluster1	GO:0140694	membraneless organelle assembly	8.238e-12	7.577e-10	81	475
Cluster1	GO:0051988	regulation of attachment of spindle microtubules to kinetochore	1.249e-11	1.136e-09	15	24
Cluster1	GO:0140013	meiotic nuclear division	2.197e-11	1.977e-09	51	240
Cluster1	GO:0006270	DNA replication initiation	6.217e-11	5.535e-09	18	38
Cluster1	GO:0034508	centromere complex assembly	7.294e-11	6.426e-09	16	30
Cluster1	GO:0030198	extracellular matrix organization	8.597e-11	7.495e-09	67	377
Cluster1	GO:0043062	extracellular structure organization	9.682e-11	8.354e-09	67	378
Cluster1	GO:0061982	meiosis I cell cycle process	1.001e-10	8.552e-09	38	155
Cluster1	GO:0045229	external encapsulating structure organization	1.09e-10	9.213e-09	67	379
Cluster1	GO:0010639	negative regulation of organelle organization	2.698e-10	2.258e-08	71	421
Cluster1	GO:0051052	regulation of DNA metabolic process	3.071e-10	2.545e-08	87	564
Cluster1	GO:0051383	kinetochore organization	3.607e-10	2.959e-08	13	21
Cluster1	GO:0097435	supramolecular fiber organization	3.892e-10	3.163e-08	128	957
Cluster1	GO:0090307	mitotic spindle assembly	7.059e-10	5.68e-08	27	92
Cluster1	GO:0007017	microtubule-based process	8.126e-10	6.477e-08	137	1058
Cluster1	GO:0034080	CENP-A containing chromatin assembly	8.666e-10	6.778e-08	9	10
Cluster1	GO:0031055	chromatin remodeling at centromere	8.666e-10	6.778e-08	9	10
Cluster1	GO:1905821	positive regulation of chromosome condensation	1.215e-09	9.411e-08	8	8
Cluster1	GO:0000281	mitotic cytokinesis	1.554e-09	1.194e-07	27	95
Cluster1	GO:0007127	meiosis I	4.84e-09	3.683e-07	34	147
Cluster1	GO:0060623	regulation of chromosome condensation	5.348e-09	4.033e-07	10	14
Cluster1	GO:0010971	positive regulation of G2/M transition of mitotic cell cycle	1.089e-08	8.14e-07	14	30
Cluster1	GO:0051338	regulation of transferase activity	1.156e-08	8.564e-07	108	810
Cluster1	GO:0000727	double-strand break repair via break-induced replication	1.653e-08	1.213e-06	9	12
Cluster1	GO:0044786	cell cycle DNA replication	1.961e-08	1.427e-06	18	51
Cluster1	GO:0033260	nuclear DNA replication	2.187e-08	1.578e-06	17	46
Cluster1	GO:0051315	attachment of mitotic spindle microtubules to kinetochore	2.29e-08	1.637e-06	13	27
Cluster1	GO:0007076	mitotic chromosome condensation	2.308e-08	1.637e-06	11	19
Cluster1	GO:0045132	meiotic chromosome segregation	3.37e-08	2.37e-06	29	122
Cluster1	GO:0030199	collagen fibril organization	3.468e-08	2.419e-06	22	76
Cluster1	GO:0045842	positive regulation of mitotic metaphase/anaphase transition	3.705e-08	2.563e-06	10	16
Cluster1	GO:0090329	regulation of DNA-templated DNA replication	3.913e-08	2.684e-06	18	53
Cluster1	GO:0030261	chromosome condensation	4.573e-08	3.111e-06	17	48
Cluster1	GO:0030029	actin filament-based process	4.651e-08	3.139e-06	116	912
Cluster1	GO:1902751	positive regulation of cell cycle G2/M phase transition	4.919e-08	3.294e-06	14	33
Cluster1	GO:0009314	response to radiation	4.99e-08	3.315e-06	74	503
Cluster1	GO:0010638	positive regulation of organelle organization	7.423e-08	4.891e-06	81	574
Cluster1	GO:1902101	positive regulation of metaphase/anaphase transition of cell cycle	8.375e-08	5.476e-06	10	17
Cluster1	GO:0061640	cytoskeleton-dependent cytokinesis	8.65e-08	5.578e-06	29	127
Cluster1	GO:0032392	DNA geometric change	8.664e-08	5.578e-06	23	86
Cluster1	GO:0030036	actin cytoskeleton organization	9.628e-08	6.151e-06	104	803
Cluster1	GO:0051129	negative regulation of cellular component organization	9.98e-08	6.327e-06	110	864
Cluster1	GO:0000910	cytokinesis	1.02e-07	6.416e-06	39	204
Cluster1	GO:0071103	DNA conformation change	1.195e-07	7.463e-06	24	94
Cluster1	GO:0051231	spindle elongation	1.304e-07	8.087e-06	9	14
Cluster1	GO:0051256	mitotic spindle midzone assembly	1.622e-07	9.981e-06	8	11
Cluster1	GO:1901976	regulation of cell cycle checkpoint	1.758e-07	1.07e-05	17	52
Cluster1	GO:0051130	positive regulation of cellular component organization	1.765e-07	1.07e-05	157	1366
Cluster1	GO:0050790	regulation of catalytic activity	1.86e-07	1.12e-05	191	1737
Cluster1	GO:0010032	meiotic chromosome condensation	2.065e-07	1.225e-05	6	6
Cluster1	GO:0006279	premeiotic DNA replication	2.065e-07	1.225e-05	6	6
Cluster1	GO:0051493	regulation of cytoskeleton organization	2.186e-07	1.288e-05	80	579
Cluster1	GO:0032508	DNA duplex unwinding	2.765e-07	1.618e-05	21	78
Cluster1	GO:0044771	meiotic cell cycle phase transition	3.037e-07	1.753e-05	9	15
Cluster1	GO:0030174	regulation of DNA-templated DNA replication initiation	3.037e-07	1.753e-05	9	15
Cluster1	GO:0051656	establishment of organelle localization	3.265e-07	1.871e-05	76	546
Cluster1	GO:0010212	response to ionizing radiation	4.024e-07	2.291e-05	31	151
Cluster1	GO:0009411	response to UV	4.358e-07	2.464e-05	33	167
Cluster1	GO:0000022	mitotic spindle elongation	4.535e-07	2.547e-05	8	12
Cluster1	GO:0035825	homologous recombination	4.941e-07	2.757e-05	20	74
Cluster1	GO:0031570	DNA integrity checkpoint signaling	5.171e-07	2.866e-05	30	145
Cluster1	GO:2000779	regulation of double-strand break repair	6.036e-07	3.323e-05	30	146
Cluster1	GO:0034501	protein localization to kinetochore	6.466e-07	3.514e-05	9	16
Cluster1	GO:1903083	protein localization to condensed chromosome	6.466e-07	3.514e-05	9	16
Cluster1	GO:0016477	cell migration	6.63e-07	3.58e-05	198	1847
Cluster1	GO:0090232	positive regulation of spindle checkpoint	1.099e-06	5.897e-05	8	13
Cluster1	GO:0006268	DNA unwinding involved in DNA replication	1.14e-06	6.077e-05	10	21
Cluster1	GO:1902969	mitotic DNA replication	1.28e-06	6.736e-05	9	17
Cluster1	GO:0051382	kinetochore assembly	1.28e-06	6.736e-05	9	17
Cluster1	GO:0031399	regulation of protein modification process	1.303e-06	6.817e-05	164	1488
Cluster1	GO:0008315	G2/MI transition of meiotic cell cycle	1.35e-06	7.018e-05	6	7
Cluster1	GO:0045005	DNA-templated DNA replication maintenance of fidelity	1.715e-06	8.861e-05	17	60
Cluster1	GO:0072359	circulatory system development	1.868e-06	9.59e-05	159	1442
Cluster1	GO:0007062	sister chromatid cohesion	2.006e-06	0.0001024	18	67
Cluster1	GO:0006275	regulation of DNA replication	2.21e-06	0.0001121	29	147
Cluster1	GO:0044774	mitotic DNA integrity checkpoint signaling	2.369e-06	0.0001194	22	95
Cluster1	GO:0051255	spindle midzone assembly	2.391e-06	0.0001198	8	14
Cluster1	GO:0009628	response to abiotic stimulus	2.442e-06	0.0001216	151	1361
Cluster1	GO:0007098	centrosome cycle	2.586e-06	0.0001281	31	164
Cluster1	GO:0007057	spindle assembly involved in female meiosis I	2.689e-06	0.0001324	5	5
Cluster1	GO:0032886	regulation of microtubule-based process	2.88e-06	0.000141	46	293
Cluster1	GO:0010569	regulation of double-strand break repair via homologous recombination	3.511e-06	0.0001708	20	83
Cluster1	GO:0042770	signal transduction in response to DNA damage	3.804e-06	0.000184	35	200
Cluster1	GO:0051640	organelle localization	3.869e-06	0.0001861	88	703
Cluster1	GO:0070507	regulation of microtubule cytoskeleton organization	4.261e-06	0.0002038	32	176
Cluster1	GO:0000077	DNA damage checkpoint signaling	4.315e-06	0.0002052	27	136
Cluster1	GO:0032465	regulation of cytokinesis	4.888e-06	0.0002311	22	99
Cluster1	GO:0031297	replication fork processing	5.431e-06	0.0002553	15	52
Cluster1	GO:0031023	microtubule organizing center organization	6.159e-06	0.000288	32	179
Cluster1	GO:0007163	establishment or maintenance of cell polarity	6.556e-06	0.0003048	41	257
Cluster1	GO:0048514	blood vessel morphogenesis	6.983e-06	0.0003229	98	817
Cluster1	GO:0001944	vasculature development	8.65e-06	0.0003978	112	969
Cluster1	GO:0090267	positive regulation of mitotic cell cycle spindle assembly checkpoint	8.872e-06	0.0004029	7	12
Cluster1	GO:0140527	reciprocal homologous recombination	8.905e-06	0.0004029	17	67
Cluster1	GO:0007131	reciprocal meiotic recombination	8.905e-06	0.0004029	17	67
Cluster1	GO:0007160	cell-matrix adhesion	9.658e-06	0.0004341	42	270
Cluster1	GO:0001568	blood vessel development	9.74e-06	0.0004341	108	929
Cluster1	GO:0071459	protein localization to chromosome, centromeric region	9.751e-06	0.0004341	13	42
Cluster1	GO:0031589	cell-substrate adhesion	9.837e-06	0.0004356	57	410
Cluster1	GO:0000018	regulation of DNA recombination	9.933e-06	0.0004375	28	150
Cluster1	GO:0010972	negative regulation of G2/M transition of mitotic cell cycle	1.133e-05	0.0004963	18	75
Cluster1	GO:0032467	positive regulation of cytokinesis	1.157e-05	0.0005045	15	55
Cluster1	GO:0090231	regulation of spindle checkpoint	1.201e-05	0.0005206	10	26
Cluster1	GO:0071711	basement membrane organization	1.3e-05	0.0005606	13	43
Cluster1	GO:0030010	establishment of cell polarity	1.31e-05	0.0005622	31	177
Cluster1	GO:0043549	regulation of kinase activity	1.476e-05	0.0006302	84	686
Cluster1	GO:0044773	mitotic DNA damage checkpoint signaling	1.548e-05	0.0006576	20	91
Cluster1	GO:0045840	positive regulation of mitotic nuclear division	1.622e-05	0.0006858	14	50
Cluster1	GO:0032271	regulation of protein polymerization	1.655e-05	0.0006957	37	231
Cluster1	GO:0019220	regulation of phosphate metabolic process	1.666e-05	0.0006957	152	1421
Cluster1	GO:1902750	negative regulation of cell cycle G2/M phase transition	1.671e-05	0.0006957	18	77
Cluster1	GO:0040001	establishment of mitotic spindle localization	1.715e-05	0.0007106	13	44
Cluster1	GO:0035239	tube morphogenesis	1.746e-05	0.0007198	125	1125
Cluster1	GO:0051174	regulation of phosphorus metabolic process	1.793e-05	0.0007288	152	1423
Cluster1	GO:0051307	meiotic chromosome separation	1.794e-05	0.0007288	7	13
Cluster1	GO:1903490	positive regulation of mitotic cytokinesis	1.794e-05	0.0007288	7	13
Cluster1	GO:0051053	negative regulation of DNA metabolic process	1.875e-05	0.0007581	28	155
Cluster1	GO:0034502	protein localization to chromosome	2.232e-05	0.000898	26	140
Cluster1	GO:0050878	regulation of body fluid levels	2.38e-05	0.0009528	59	442
Cluster1	GO:0071897	DNA biosynthetic process	2.631e-05	0.001048	35	218
Cluster1	GO:0007143	female meiotic nuclear division	2.645e-05	0.001049	14	52
Cluster1	GO:0001525	angiogenesis	2.732e-05	0.001079	85	708
Cluster1	GO:1903504	regulation of mitotic spindle checkpoint	2.812e-05	0.001095	9	23
Cluster1	GO:0090266	regulation of mitotic cell cycle spindle assembly checkpoint	2.812e-05	0.001095	9	23
Cluster1	GO:0007096	regulation of exit from mitosis	2.812e-05	0.001095	9	23
Cluster1	GO:0085029	extracellular matrix assembly	2.895e-05	0.001122	15	59
Cluster1	GO:0042325	regulation of phosphorylation	2.979e-05	0.001149	133	1226
Cluster1	GO:0007155	cell adhesion	3.129e-05	0.001201	173	1675
Cluster1	GO:0031109	microtubule polymerization or depolymerization	3.248e-05	0.001241	29	168
Cluster1	GO:0007144	female meiosis I	3.349e-05	0.001274	7	14
Cluster1	GO:1902903	regulation of supramolecular fiber organization	3.506e-05	0.001328	58	438
Cluster1	GO:0000079	regulation of cyclin-dependent protein serine/threonine kinase activity	3.534e-05	0.001332	20	96
Cluster1	GO:0051653	spindle localization	3.669e-05	0.001377	16	67
Cluster1	GO:0007015	actin filament organization	3.801e-05	0.00142	65	509
Cluster1	GO:0045859	regulation of protein kinase activity	3.858e-05	0.001435	75	611
Cluster1	GO:0051054	positive regulation of DNA metabolic process	3.926e-05	0.001454	47	333
Cluster1	GO:0051258	protein polymerization	4.235e-05	0.001556	47	334
Cluster1	GO:1901978	positive regulation of cell cycle checkpoint	4.24e-05	0.001556	8	19
Cluster1	GO:0070192	chromosome organization involved in meiotic cell cycle	4.348e-05	0.001582	17	75
Cluster1	GO:0051785	positive regulation of nuclear division	4.348e-05	0.001582	17	75
Cluster1	GO:0044843	cell cycle G1/S phase transition	4.369e-05	0.001583	44	306
Cluster1	GO:2001252	positive regulation of chromosome organization	4.423e-05	0.001595	22	113
Cluster1	GO:0032506	cytokinetic process	4.768e-05	0.001713	13	48
Cluster1	GO:0006282	regulation of DNA repair	5.145e-05	0.00184	36	234
Cluster1	GO:0071824	protein-DNA complex organization	5.189e-05	0.001848	111	999
Cluster1	GO:0080135	regulation of cellular response to stress	5.826e-05	0.002061	73	598
Cluster1	GO:0031115	negative regulation of microtubule polymerization	5.861e-05	0.002061	7	15
Cluster1	GO:0006271	DNA strand elongation involved in DNA replication	5.861e-05	0.002061	7	15
Cluster1	GO:0031145	anaphase-promoting complex-dependent catabolic process	6.105e-05	0.002138	9	25
Cluster1	GO:1904029	regulation of cyclin-dependent protein kinase activity	6.516e-05	0.002272	20	100
Cluster1	GO:0048646	anatomical structure formation involved in morphogenesis	6.699e-05	0.002326	154	1483
Cluster1	GO:0048251	elastic fiber assembly	6.795e-05	0.00234	6	11
Cluster1	GO:0045876	positive regulation of sister chromatid cohesion	6.795e-05	0.00234	6	11
Cluster1	GO:0016310	phosphorylation	7.074e-05	0.002426	183	1815
Cluster1	GO:0030168	platelet activation	7.159e-05	0.002446	27	158
Cluster1	GO:0051347	positive regulation of transferase activity	7.441e-05	0.002531	62	490
Cluster1	GO:0071478	cellular response to radiation	8.116e-05	0.00275	31	194
Cluster1	GO:0007599	hemostasis	8.922e-05	0.003011	39	268
Cluster1	GO:0035295	tube development	9.129e-05	0.003068	146	1402
Cluster1	GO:1902412	regulation of mitotic cytokinesis	9.727e-05	0.003256	7	16
Cluster1	GO:0000082	G1/S transition of mitotic cell cycle	0.0001136	0.003788	39	271
Cluster1	GO:0044818	mitotic G2/M transition checkpoint	0.0001195	0.003967	14	59
Cluster1	GO:0000132	establishment of mitotic spindle orientation	0.0001212	0.004011	11	39
Cluster1	GO:0065003	protein-containing complex assembly	0.0001221	0.004023	184	1845
Cluster1	GO:0060242	contact inhibition	0.0001236	0.004039	5	8
Cluster1	GO:0016321	female meiosis chromosome segregation	0.0001236	0.004039	5	8
Cluster1	GO:0051987	positive regulation of attachment of spindle microtubules to kinetochore	0.000127	0.004105	6	12
Cluster1	GO:1901993	regulation of meiotic cell cycle phase transition	0.000127	0.004105	6	12
Cluster1	GO:0038063	collagen-activated tyrosine kinase receptor signaling pathway	0.000127	0.004105	6	12
Cluster1	GO:0034644	cellular response to UV	0.0001315	0.004233	19	97
Cluster1	GO:0001932	regulation of protein phosphorylation	0.0001328	0.004257	121	1133
Cluster1	GO:0051294	establishment of spindle orientation	0.0001375	0.004393	12	46
Cluster1	GO:0008284	positive regulation of cell population proliferation	0.0001394	0.004437	126	1190
Cluster1	GO:0051445	regulation of meiotic cell cycle	0.0001419	0.0045	17	82
Cluster1	GO:0007584	response to nutrient	0.0001582	0.004997	30	192
Cluster1	GO:1902315	nuclear cell cycle DNA replication initiation	0.0001643	0.005112	4	5
Cluster1	GO:1902292	cell cycle DNA replication initiation	0.0001643	0.005112	4	5
Cluster1	GO:1902975	mitotic DNA replication initiation	0.0001643	0.005112	4	5
Cluster1	GO:0110030	regulation of G2/MI transition of meiotic cell cycle	0.0001643	0.005112	4	5
Cluster1	GO:0006468	protein phosphorylation	0.0001739	0.005391	162	1604
Cluster1	GO:0009967	positive regulation of signal transduction	0.0001805	0.005575	181	1824
Cluster1	GO:0051247	positive regulation of protein metabolic process	0.0001872	0.005761	149	1458
Cluster1	GO:0031110	regulation of microtubule polymerization or depolymerization	0.0001975	0.006054	20	108
Cluster1	GO:0040011	locomotion	0.000203	0.006199	155	1529
Cluster1	GO:1904666	regulation of ubiquitin protein ligase activity	0.0002081	0.006334	8	23
Cluster1	GO:0061572	actin filament bundle organization	0.0002092	0.006343	30	195
Cluster1	GO:0051293	establishment of spindle localization	0.0002101	0.006347	14	62
Cluster1	GO:0090224	regulation of spindle organization	0.0002133	0.00642	12	48
Cluster1	GO:0008630	intrinsic apoptotic signaling pathway in response to DNA damage	0.0002179	0.006535	21	117
Cluster1	GO:0009611	response to wounding	0.0002556	0.007639	76	659
Cluster1	GO:0060245	detection of cell density	0.0002603	0.007753	5	9
Cluster1	GO:0097193	intrinsic apoptotic signaling pathway	0.0002761	0.008194	47	361
Cluster1	GO:0009416	response to light stimulus	0.0002945	0.008709	49	382
Cluster1	GO:2000463	positive regulation of excitatory postsynaptic potential	0.0003127	0.009214	11	43
Cluster1	GO:0051017	actin filament bundle assembly	0.0003318	0.009742	29	191
Cluster1	GO:0051781	positive regulation of cell division	0.0003379	0.009888	19	104
Cluster1	GO:0051302	regulation of cell division	0.0003568	0.0104	30	201
Cluster1	GO:0010458	exit from mitosis	0.0003602	0.01045	10	37
Cluster1	GO:2001046	positive regulation of integrin-mediated signaling pathway	0.0003608	0.01045	6	14
Cluster1	GO:1901873	regulation of post-translational protein modification	0.0003683	0.01063	38	277
Cluster1	GO:0043085	positive regulation of catalytic activity	0.0003709	0.01067	109	1028
Cluster1	GO:0060236	regulation of mitotic spindle organization	0.0003882	0.01113	11	44
Cluster1	GO:0065004	protein-DNA complex assembly	0.0003903	0.01115	35	249
Cluster1	GO:0051298	centrosome duplication	0.0003937	0.01121	16	81
Cluster1	GO:0007596	blood coagulation	0.0004344	0.01232	36	260
Cluster1	GO:0110032	positive regulation of G2/MI transition of meiotic cell cycle	0.0004556	0.01288	3	3
Cluster1	GO:1903320	regulation of protein modification by small protein conjugation or removal	0.0004791	0.0135	37	271
Cluster1	GO:1902423	regulation of attachment of mitotic spindle microtubules to kinetochore	0.0004876	0.01365	5	10
Cluster1	GO:0007056	spindle assembly involved in female meiosis	0.0004876	0.01365	5	10
Cluster1	GO:0007229	integrin-mediated signaling pathway	0.0004933	0.01376	21	124
Cluster1	GO:0007063	regulation of sister chromatid cohesion	0.000501	0.01388	7	20
Cluster1	GO:0000076	DNA replication checkpoint signaling	0.000501	0.01388	7	20
Cluster1	GO:0032272	negative regulation of protein polymerization	0.0005206	0.01438	17	91
Cluster1	GO:0051443	positive regulation of ubiquitin-protein transferase activity	0.0005385	0.01482	8	26
Cluster1	GO:0007264	small GTPase-mediated signal transduction	0.0005609	0.01538	63	538
Cluster1	GO:0090235	regulation of metaphase plate congression	0.0005623	0.01538	6	15
Cluster1	GO:0006284	base-excision repair	0.0005856	0.01596	11	46
Cluster1	GO:0006909	phagocytosis	0.0005918	0.01608	37	274
Cluster1	GO:0044087	regulation of cellular component biogenesis	0.0006148	0.01665	122	1189
Cluster1	GO:0034446	substrate adhesion-dependent cell spreading	0.0006219	0.01679	19	109
Cluster1	GO:1902806	regulation of cell cycle G1/S phase transition	0.0006378	0.01716	34	246
Cluster1	GO:1902410	mitotic cytokinetic process	0.0006568	0.01762	9	33
Cluster1	GO:0050817	coagulation	0.0006681	0.01786	36	266
Cluster1	GO:0030041	actin filament polymerization	0.0006769	0.01804	28	190
Cluster1	GO:0032970	regulation of actin filament-based process	0.0007029	0.01868	53	438
Cluster1	GO:0007095	mitotic G2 DNA damage checkpoint signaling	0.000709	0.01872	10	40
Cluster1	GO:2000780	negative regulation of double-strand break repair	0.000709	0.01872	10	40
Cluster1	GO:0061061	muscle structure development	0.0007301	0.01922	92	858
Cluster1	GO:0031401	positive regulation of protein modification process	0.0007654	0.02008	99	937
Cluster1	GO:1902231	positive regulation of intrinsic apoptotic signaling pathway in response to DNA damage	0.0008373	0.02166	5	11
Cluster1	GO:0110011	regulation of basement membrane organization	0.0008373	0.02166	5	11
Cluster1	GO:1904668	positive regulation of ubiquitin protein ligase activity	0.0008373	0.02166	5	11
Cluster1	GO:0019371	cyclooxygenase pathway	0.0008373	0.02166	5	11
Cluster1	GO:0051299	centrosome separation	0.0008413	0.02166	6	16
Cluster1	GO:0051764	actin crosslink formation	0.0008413	0.02166	6	16
Cluster1	GO:0030334	regulation of cell migration	0.0008581	0.02195	123	1211
Cluster1	GO:0030833	regulation of actin filament polymerization	0.00086	0.02195	24	156
Cluster1	GO:0051438	regulation of ubiquitin-protein transferase activity	0.0008603	0.02195	11	48
Cluster1	GO:0070527	platelet aggregation	0.0008674	0.02206	17	95
Cluster1	GO:0032963	collagen metabolic process	0.0009477	0.02403	23	148
Cluster1	GO:0001822	kidney development	0.0009766	0.02469	46	372
Cluster1	GO:0030218	erythrocyte differentiation	0.0009959	0.0251	26	176
Cluster1	GO:0010811	positive regulation of cell-substrate adhesion	0.001041	0.02616	23	149
Cluster1	GO:0051495	positive regulation of cytoskeleton organization	0.001065	0.0267	29	205
Cluster1	GO:0045738	negative regulation of DNA repair	0.001069	0.0267	10	42
Cluster1	GO:1902533	positive regulation of intracellular signal transduction	0.001089	0.02713	130	1299
Cluster1	GO:0019953	sexual reproduction	0.001138	0.02826	131	1312
Cluster1	GO:0072001	renal system development	0.0012	0.02972	47	386
Cluster1	GO:0031573	mitotic intra-S DNA damage checkpoint signaling	0.001216	0.02984	6	17
Cluster1	GO:0006978	DNA damage response, signal transduction by p53 class mediator resulting in transcription of p21 class mediator	0.001216	0.02984	6	17
Cluster1	GO:0085020	protein K6-linked ubiquitination	0.001216	0.02984	6	17
Cluster1	GO:2000145	regulation of cell motility	0.001222	0.0299	128	1280
Cluster1	GO:0040012	regulation of locomotion	0.001258	0.03069	132	1327
Cluster1	GO:0007064	mitotic sister chromatid cohesion	0.0013	0.03163	9	36
Cluster1	GO:0160049	negative regulation of cGAS/STING signaling pathway	0.001345	0.03262	5	12
Cluster1	GO:0042060	wound healing	0.001351	0.03269	57	493
Cluster1	GO:0007019	microtubule depolymerization	0.001379	0.03327	13	66
Cluster1	GO:0080134	regulation of response to stress	0.001406	0.03381	161	1668
Cluster1	GO:0034101	erythrocyte homeostasis	0.001453	0.03484	27	190
Cluster1	GO:0031111	negative regulation of microtubule polymerization or depolymerization	0.001465	0.03498	11	51
Cluster1	GO:0032388	positive regulation of intracellular transport	0.001467	0.03498	24	162
Cluster1	GO:0033627	cell adhesion mediated by integrin	0.001474	0.03504	16	91
Cluster1	GO:0070925	organelle assembly	0.001494	0.03542	115	1138
Cluster1	GO:0051261	protein depolymerization	0.001516	0.03584	22	144
Cluster1	GO:0031032	actomyosin structure organization	0.00154	0.03625	32	239
Cluster1	GO:0014070	response to organic cyclic compound	0.001542	0.03625	107	1048
Cluster1	GO:1902229	regulation of intrinsic apoptotic signaling pathway in response to DNA damage	0.001565	0.03662	10	44
Cluster1	GO:0007507	heart development	0.001568	0.03662	81	757
Cluster1	GO:0072331	signal transduction by p53 class mediator	0.001571	0.03662	27	191
Cluster1	GO:2000001	regulation of DNA damage checkpoint	0.001703	0.03927	7	24
Cluster1	GO:0042772	DNA damage response, signal transduction resulting in transcription	0.001706	0.03927	6	18
Cluster1	GO:0038065	collagen-activated signaling pathway	0.001706	0.03927	6	18
Cluster1	GO:0060244	negative regulation of cell proliferation involved in contact inhibition	0.001717	0.03927	3	4
Cluster1	GO:0035583	sequestering of TGFbeta in extracellular matrix	0.001717	0.03927	3	4
Cluster1	GO:0051309	female meiosis chromosome separation	0.001717	0.03927	3	4
Cluster1	GO:1901995	positive regulation of meiotic cell cycle phase transition	0.001717	0.03927	3	4
Cluster1	GO:0071479	cellular response to ionizing radiation	0.001805	0.04106	14	76
Cluster1	GO:0006979	response to oxidative stress	0.001808	0.04106	55	478
Cluster1	GO:0090066	regulation of anatomical structure size	0.00181	0.04106	68	618
Cluster1	GO:0008154	actin polymerization or depolymerization	0.001837	0.04155	30	222
Cluster1	GO:0006325	chromatin organization	0.00188	0.04241	93	896
Cluster1	GO:1902425	positive regulation of attachment of mitotic spindle microtubules to kinetochore	0.001904	0.04272	4	8
Cluster1	GO:0051601	exocyst localization	0.001904	0.04272	4	8
Cluster1	GO:0002029	desensitization of G protein-coupled receptor signaling pathway	0.001925	0.04307	8	31
Cluster1	GO:2000045	regulation of G1/S transition of mitotic cell cycle	0.001934	0.04316	29	213
Cluster1	GO:0036293	response to decreased oxygen levels	0.001946	0.04332	44	364
Cluster1	GO:0006301	postreplication repair	0.001958	0.04346	9	38
Cluster1	GO:0051494	negative regulation of cytoskeleton organization	0.001976	0.04367	27	194
Cluster1	GO:0031400	negative regulation of protein modification process	0.001978	0.04367	58	512
Cluster1	GO:0030225	macrophage differentiation	0.002052	0.0452	14	77
Cluster1	GO:0031113	regulation of microtubule polymerization	0.002102	0.04608	13	69
Cluster1	GO:1904645	response to amyloid-beta	0.002103	0.04608	12	61
Cluster1	GO:0071482	cellular response to light stimulus	0.00223	0.04872	20	130
Cluster1	GO:0055086	nucleobase-containing small molecule metabolic process	0.002253	0.04893	81	767
Cluster1	GO:0010562	positive regulation of phosphorus metabolic process	0.002257	0.04893	91	879
Cluster1	GO:0045937	positive regulation of phosphate metabolic process	0.002257	0.04893	91	879
Cluster1	GO:0071560	cellular response to transforming growth factor beta stimulus	0.002286	0.04939	41	336
Cluster1	GO:0070482	response to oxygen levels	0.00229	0.04939	50	430
Cluster1	GO:0008064	regulation of actin polymerization or depolymerization	0.00232	0.04992	25	177
Cluster2	GO:0046907	intracellular transport	9.326e-29	9.193e-25	295	1496
Cluster2	GO:0044248	cellular catabolic process	2.036e-28	1.004e-24	259	1253
Cluster2	GO:0015031	protein transport	9.486e-26	3.117e-22	303	1615
Cluster2	GO:0045184	establishment of protein localization	2.446e-23	6.028e-20	340	1945
Cluster2	GO:0061919	process utilizing autophagic mechanism	1.8e-20	2.957e-17	148	650
Cluster2	GO:0006914	autophagy	1.8e-20	2.957e-17	148	650
Cluster2	GO:0016236	macroautophagy	9.697e-20	1.365e-16	101	374
Cluster2	GO:0016192	vesicle-mediated transport	8.939e-19	1.101e-15	302	1778
Cluster2	GO:0030163	protein catabolic process	4.129e-17	4.522e-14	207	1115
Cluster2	GO:0010256	endomembrane system organization	1.088e-16	1.072e-13	142	672
Cluster2	GO:0048193	Golgi vesicle transport	1.008e-15	9.032e-13	87	339
Cluster2	GO:0009057	macromolecule catabolic process	1.763e-15	1.448e-12	271	1635
Cluster2	GO:0051603	proteolysis involved in protein catabolic process	4.593e-15	3.482e-12	158	812
Cluster2	GO:0009894	regulation of catabolic process	2.949e-14	2.007e-11	216	1252
Cluster2	GO:0043632	modification-dependent macromolecule catabolic process	3.055e-14	2.007e-11	133	656
Cluster2	GO:0009896	positive regulation of catabolic process	4.851e-14	2.988e-11	139	701
Cluster2	GO:0006511	ubiquitin-dependent protein catabolic process	5.206e-14	3.019e-11	130	640
Cluster2	GO:0007033	vacuole organization	5.541e-14	3.034e-11	68	249
Cluster2	GO:0044087	regulation of cellular component biogenesis	8.072e-14	4.188e-11	206	1189
Cluster2	GO:0019941	modification-dependent protein catabolic process	8.616e-14	4.247e-11	131	651
Cluster2	GO:0033043	regulation of organelle organization	9.779e-14	4.59e-11	226	1342
Cluster2	GO:0033365	protein localization to organelle	1.37e-13	6.14e-11	192	1091
Cluster2	GO:0060341	regulation of cellular localization	1.592e-13	6.821e-11	208	1212
Cluster2	GO:0006629	lipid metabolic process	3.655e-13	1.501e-10	249	1536
Cluster2	GO:0010498	proteasomal protein catabolic process	7.546e-13	2.975e-10	116	567
Cluster2	GO:0061024	membrane organization	9.445e-13	3.581e-10	165	914
Cluster2	GO:0007034	vacuolar transport	1.956e-12	7.142e-10	54	187
Cluster2	GO:0006886	intracellular protein transport	3.394e-12	1.195e-09	139	740
Cluster2	GO:0072665	protein localization to vacuole	4.792e-12	1.629e-09	34	89
Cluster2	GO:0043687	post-translational protein modification	5.292e-12	1.739e-09	184	1074
Cluster2	GO:0007041	lysosomal transport	1.095e-11	3.48e-09	46	151
Cluster2	GO:0051130	positive regulation of cellular component organization	3.334e-11	1.027e-08	219	1366
Cluster2	GO:0016050	vesicle organization	6.652e-11	1.987e-08	88	415
Cluster2	GO:0070647	protein modification by small protein conjugation or removal	7.647e-11	2.217e-08	171	1009
Cluster2	GO:0016197	endosomal transport	8.877e-11	2.5e-08	73	320
Cluster2	GO:0006623	protein targeting to vacuole	9.664e-11	2.646e-08	23	49
Cluster2	GO:0032446	protein modification by small protein conjugation	1.041e-10	2.772e-08	155	893
Cluster2	GO:0072666	establishment of protein localization to vacuole	1.177e-10	3.052e-08	27	66
Cluster2	GO:0030182	neuron differentiation	1.385e-10	3.501e-08	267	1769
Cluster2	GO:0032880	regulation of protein localization	1.635e-10	4.028e-08	180	1087
Cluster2	GO:0046486	glycerolipid metabolic process	1.721e-10	4.138e-08	89	429
Cluster2	GO:0043161	proteasome-mediated ubiquitin-dependent protein catabolic process	2.131e-10	4.959e-08	88	424
Cluster2	GO:0051668	localization within membrane	2.169e-10	4.959e-08	141	798
Cluster2	GO:0048699	generation of neurons	2.214e-10	4.959e-08	277	1858
Cluster2	GO:0010506	regulation of autophagy	2.993e-10	6.556e-08	84	400
Cluster2	GO:0051650	establishment of vesicle localization	3.769e-10	8.076e-08	56	224
Cluster2	GO:0022411	cellular component disassembly	4.288e-10	8.994e-08	115	617
Cluster2	GO:1905037	autophagosome organization	5.107e-10	1.049e-07	39	129
Cluster2	GO:0048666	neuron development	5.38e-10	1.08e-07	226	1463
Cluster2	GO:1903829	positive regulation of protein localization	5.478e-10	1.08e-07	111	591
Cluster2	GO:0031346	positive regulation of cell projection organization	6.095e-10	1.178e-07	97	494
Cluster2	GO:0016567	protein ubiquitination	6.727e-10	1.275e-07	141	811
Cluster2	GO:0006635	fatty acid beta-oxidation	7.552e-10	1.405e-07	29	80
Cluster2	GO:0120036	plasma membrane bounded cell projection organization	8.383e-10	1.53e-07	278	1890
Cluster2	GO:0051648	vesicle localization	8.692e-10	1.558e-07	59	247
Cluster2	GO:0030030	cell projection organization	9.894e-10	1.741e-07	283	1934
Cluster2	GO:0071495	cellular response to endogenous stimulus	1.086e-09	1.878e-07	250	1667
Cluster2	GO:0035966	response to topologically incorrect protein	1.27e-09	2.158e-07	45	166
Cluster2	GO:0009719	response to endogenous stimulus	1.646e-09	2.67e-07	285	1960
Cluster2	GO:0034976	response to endoplasmic reticulum stress	1.649e-09	2.67e-07	66	295
Cluster2	GO:0010508	positive regulation of autophagy	1.652e-09	2.67e-07	46	173
Cluster2	GO:0070925	organelle assembly	2.141e-09	3.4e-07	182	1138
Cluster2	GO:0061462	protein localization to lysosome	2.173e-09	3.4e-07	24	60
Cluster2	GO:0031929	TOR signaling	2.557e-09	3.907e-07	47	181
Cluster2	GO:0032006	regulation of TOR signaling	2.576e-09	3.907e-07	43	158
Cluster2	GO:0043254	regulation of protein-containing complex assembly	3.481e-09	5.199e-07	94	489
Cluster2	GO:1901698	response to nitrogen compound	3.788e-09	5.572e-07	198	1272
Cluster2	GO:0000209	protein polyubiquitination	4.451e-09	6.452e-07	64	289
Cluster2	GO:0016310	phosphorylation	4.555e-09	6.508e-07	265	1815
Cluster2	GO:0019637	organophosphate metabolic process	4.776e-09	6.613e-07	181	1142
Cluster2	GO:0009968	negative regulation of signal transduction	4.812e-09	6.613e-07	238	1596
Cluster2	GO:0019395	fatty acid oxidation	4.831e-09	6.613e-07	36	122
Cluster2	GO:0120035	regulation of plasma membrane bounded cell projection organization	6.356e-09	8.583e-07	142	846
Cluster2	GO:1902115	regulation of organelle assembly	7.761e-09	1.034e-06	62	280
Cluster2	GO:0006892	post-Golgi vesicle-mediated transport	8.643e-09	1.136e-06	35	119
Cluster2	GO:0000045	autophagosome assembly	1.392e-08	1.805e-06	35	121
Cluster2	GO:0044089	positive regulation of cellular component biogenesis	1.509e-08	1.932e-06	105	582
Cluster2	GO:0023057	negative regulation of signaling	1.564e-08	1.977e-06	253	1740
Cluster2	GO:0006577	amino-acid betaine metabolic process	1.679e-08	2.094e-06	12	18
Cluster2	GO:0000902	cell morphogenesis	1.817e-08	2.239e-06	185	1194
Cluster2	GO:0016241	regulation of macroautophagy	1.951e-08	2.374e-06	46	186
Cluster2	GO:0031122	cytoplasmic microtubule organization	2.017e-08	2.425e-06	24	66
Cluster2	GO:0031175	neuron projection development	2.27e-08	2.696e-06	196	1285
Cluster2	GO:0031344	regulation of cell projection organization	2.314e-08	2.715e-06	142	863
Cluster2	GO:0034440	lipid oxidation	2.445e-08	2.835e-06	36	129
Cluster2	GO:0010648	negative regulation of cell communication	2.794e-08	3.202e-06	252	1743
Cluster2	GO:0006468	protein phosphorylation	2.85e-08	3.229e-06	235	1604
Cluster2	GO:0043112	receptor metabolic process	3.109e-08	3.482e-06	27	82
Cluster2	GO:0006622	protein targeting to lysosome	3.945e-08	4.369e-06	16	33
Cluster2	GO:0072657	protein localization to membrane	4.432e-08	4.855e-06	120	705
Cluster2	GO:0019752	carboxylic acid metabolic process	4.501e-08	4.876e-06	163	1035
Cluster2	GO:0051056	regulation of small GTPase mediated signal transduction	4.635e-08	4.966e-06	68	333
Cluster2	GO:0007167	enzyme-linked receptor protein signaling pathway	4.833e-08	5.122e-06	182	1186
Cluster2	GO:0045017	glycerolipid biosynthetic process	5.495e-08	5.762e-06	58	268
Cluster2	GO:0009062	fatty acid catabolic process	5.568e-08	5.778e-06	33	116
Cluster2	GO:0007030	Golgi organization	5.723e-08	5.877e-06	42	168
Cluster2	GO:0072329	monocarboxylic acid catabolic process	6.389e-08	6.492e-06	38	145
Cluster2	GO:0007032	endosome organization	6.956e-08	6.997e-06	31	106
Cluster2	GO:0043436	oxoacid metabolic process	7.225e-08	7.194e-06	165	1058
Cluster2	GO:1902532	negative regulation of intracellular signal transduction	7.541e-08	7.433e-06	131	795
Cluster2	GO:0032984	protein-containing complex disassembly	8.501e-08	8.297e-06	61	291
Cluster2	GO:0006508	proteolysis	9.094e-08	8.788e-06	260	1833
Cluster2	GO:0016054	organic acid catabolic process	9.459e-08	8.965e-06	58	272
Cluster2	GO:0046395	carboxylic acid catabolic process	9.459e-08	8.965e-06	58	272
Cluster2	GO:0006888	endoplasmic reticulum to Golgi vesicle-mediated transport	9.778e-08	9.179e-06	40	159
Cluster2	GO:0006082	organic acid metabolic process	1.057e-07	9.827e-06	165	1064
Cluster2	GO:1902117	positive regulation of organelle assembly	1.075e-07	9.903e-06	29	97
Cluster2	GO:0006650	glycerophospholipid metabolic process	1.12e-07	1.022e-05	65	320
Cluster2	GO:0031669	cellular response to nutrient levels	1.44e-07	1.302e-05	56	262
Cluster2	GO:0010976	positive regulation of neuron projection development	1.453e-07	1.302e-05	54	249
Cluster2	GO:0046488	phosphatidylinositol metabolic process	2.352e-07	2.089e-05	41	170
Cluster2	GO:0006644	phospholipid metabolic process	2.417e-07	2.127e-05	77	410
Cluster2	GO:1901699	cellular response to nitrogen compound	2.85e-07	2.486e-05	123	752
Cluster2	GO:0051493	regulation of cytoskeleton organization	2.943e-07	2.544e-05	100	579
Cluster2	GO:0140352	export from cell	3.025e-07	2.593e-05	174	1153
Cluster2	GO:0008654	phospholipid biosynthetic process	3.167e-07	2.677e-05	56	268
Cluster2	GO:0098657	import into cell	3.177e-07	2.677e-05	164	1074
Cluster2	GO:0032787	monocarboxylic acid metabolic process	3.281e-07	2.741e-05	120	731
Cluster2	GO:0006986	response to unfolded protein	3.45e-07	2.858e-05	37	148
Cluster2	GO:0010638	positive regulation of organelle organization	3.601e-07	2.958e-05	99	574
Cluster2	GO:0007264	small GTPase-mediated signal transduction	3.912e-07	3.186e-05	94	538
Cluster2	GO:1990778	protein localization to cell periphery	3.947e-07	3.189e-05	78	422
Cluster2	GO:1901701	cellular response to oxygen-containing compound	3.984e-07	3.193e-05	210	1450
Cluster2	GO:0007163	establishment or maintenance of cell polarity	4.249e-07	3.377e-05	54	257
Cluster2	GO:0030705	cytoskeleton-dependent intracellular transport	4.729e-07	3.729e-05	49	225
Cluster2	GO:0038202	TORC1 signaling	4.846e-07	3.791e-05	30	109
Cluster2	GO:0008286	insulin receptor signaling pathway	4.897e-07	3.801e-05	38	156
Cluster2	GO:0007010	cytoskeleton organization	5.139e-07	3.957e-05	233	1645
Cluster2	GO:0046903	secretion	5.833e-07	4.457e-05	181	1221
Cluster2	GO:0030258	lipid modification	6.221e-07	4.717e-05	47	214
Cluster2	GO:0016358	dendrite development	6.312e-07	4.749e-05	65	335
Cluster2	GO:0035967	cellular response to topologically incorrect protein	6.381e-07	4.765e-05	31	116
Cluster2	GO:0010975	regulation of neuron projection development	6.931e-07	5.137e-05	103	612
Cluster2	GO:0045732	positive regulation of protein catabolic process	7.152e-07	5.261e-05	49	228
Cluster2	GO:0032940	secretion by cell	7.238e-07	5.285e-05	161	1064
Cluster2	GO:0006890	retrograde vesicle-mediated transport, Golgi to endoplasmic reticulum	7.684e-07	5.569e-05	19	53
Cluster2	GO:0006891	intra-Golgi vesicle-mediated transport	7.849e-07	5.647e-05	15	35
Cluster2	GO:0009967	positive regulation of signal transduction	8.864e-07	6.331e-05	253	1824
Cluster2	GO:0051247	positive regulation of protein metabolic process	8.98e-07	6.368e-05	209	1458
Cluster2	GO:0009267	cellular response to starvation	9.633e-07	6.783e-05	42	185
Cluster2	GO:0032007	negative regulation of TOR signaling	1.022e-06	7.124e-05	23	74
Cluster2	GO:0007169	cell surface receptor protein tyrosine kinase signaling pathway	1.026e-06	7.124e-05	120	747
Cluster2	GO:0016042	lipid catabolic process	1.047e-06	7.219e-05	71	382
Cluster2	GO:0007029	endoplasmic reticulum organization	1.058e-06	7.219e-05	29	107
Cluster2	GO:0032869	cellular response to insulin stimulus	1.062e-06	7.219e-05	55	271
Cluster2	GO:1903432	regulation of TORC1 signaling	1.221e-06	8.245e-05	28	102
Cluster2	GO:0032606	type I interferon production	1.709e-06	0.0001146	35	145
Cluster2	GO:0006903	vesicle targeting	1.849e-06	0.0001231	22	71
Cluster2	GO:0010876	lipid localization	1.945e-06	0.0001284	95	565
Cluster2	GO:0030010	establishment of cell polarity	1.954e-06	0.0001284	40	177
Cluster2	GO:0006897	endocytosis	1.981e-06	0.0001293	129	827
Cluster2	GO:0009725	response to hormone	2.039e-06	0.0001322	156	1042
Cluster2	GO:0051640	organelle localization	2.057e-06	0.0001325	113	703
Cluster2	GO:0006869	lipid transport	2.077e-06	0.0001329	87	506
Cluster2	GO:0002831	regulation of response to biotic stimulus	2.281e-06	0.0001451	105	643
Cluster2	GO:0046474	glycerophospholipid biosynthetic process	2.299e-06	0.0001453	46	217
Cluster2	GO:0072594	establishment of protein localization to organelle	2.36e-06	0.0001482	88	515
Cluster2	GO:0009611	response to wounding	2.395e-06	0.0001494	107	659
Cluster2	GO:0032479	regulation of type I interferon production	2.449e-06	0.0001511	34	141
Cluster2	GO:0090407	organophosphate biosynthetic process	2.452e-06	0.0001511	105	644
Cluster2	GO:0031399	regulation of protein modification process	2.541e-06	0.0001556	210	1488
Cluster2	GO:0099518	vesicle cytoskeletal trafficking	2.564e-06	0.000156	21	67
Cluster2	GO:0006790	sulfur compound metabolic process	3.256e-06	0.0001969	67	365
Cluster2	GO:0022604	regulation of cell morphogenesis	3.472e-06	0.0002087	58	302
Cluster2	GO:0032870	cellular response to hormone stimulus	3.658e-06	0.0002185	115	727
Cluster2	GO:0072659	protein localization to plasma membrane	3.837e-06	0.0002278	61	324
Cluster2	GO:0016482	cytosolic transport	3.906e-06	0.0002306	35	150
Cluster2	GO:0002064	epithelial cell development	4.158e-06	0.000244	53	269
Cluster2	GO:0006661	phosphatidylinositol biosynthetic process	4.239e-06	0.0002472	32	132
Cluster2	GO:0032535	regulation of cellular component size	4.306e-06	0.0002497	75	426
Cluster2	GO:0042060	wound healing	4.459e-06	0.000257	84	493
Cluster2	GO:0042594	response to starvation	4.564e-06	0.0002615	47	229
Cluster2	GO:0002253	activation of immune response	4.891e-06	0.0002787	101	623
Cluster2	GO:0006641	triglyceride metabolic process	5.111e-06	0.0002896	31	127
Cluster2	GO:0010970	transport along microtubule	5.343e-06	0.000301	42	197
Cluster2	GO:0016239	positive regulation of macroautophagy	5.448e-06	0.0003051	25	92
Cluster2	GO:0048878	chemical homeostasis	5.8e-06	0.000323	179	1249
Cluster2	GO:0051174	regulation of phosphorus metabolic process	5.868e-06	0.0003249	200	1423
Cluster2	GO:0008610	lipid biosynthetic process	5.903e-06	0.0003251	125	813
Cluster2	GO:1902533	positive regulation of intracellular signal transduction	5.956e-06	0.0003262	185	1299
Cluster2	GO:0019725	cellular homeostasis	6.03e-06	0.0003284	146	981
Cluster2	GO:0006974	DNA damage response	6.791e-06	0.0003678	143	959
Cluster2	GO:0019220	regulation of phosphate metabolic process	7.824e-06	0.0004214	199	1421
Cluster2	GO:0062012	regulation of small molecule metabolic process	8.555e-06	0.0004571	75	434
Cluster2	GO:0070936	protein K48-linked ubiquitination	8.578e-06	0.0004571	26	100
Cluster2	GO:0034067	protein localization to Golgi apparatus	8.777e-06	0.0004651	13	32
Cluster2	GO:0098927	vesicle-mediated transport between endosomal compartments	8.873e-06	0.0004677	18	56
Cluster2	GO:0080134	regulation of response to stress	9.147e-06	0.0004796	228	1668
Cluster2	GO:0044282	small molecule catabolic process	9.949e-06	0.0005189	73	421
Cluster2	GO:1900076	regulation of cellular response to insulin stimulus	1.042e-05	0.0005403	26	101
Cluster2	GO:0042176	regulation of protein catabolic process	1.061e-05	0.0005475	71	407
Cluster2	GO:0009437	carnitine metabolic process	1.117e-05	0.0005715	8	13
Cluster2	GO:0019216	regulation of lipid metabolic process	1.119e-05	0.0005715	72	415
Cluster2	GO:0000301	retrograde transport, vesicle recycling within Golgi	1.218e-05	0.0006188	7	10
Cluster2	GO:1905897	regulation of response to endoplasmic reticulum stress	1.231e-05	0.0006224	25	96
Cluster2	GO:0007049	cell cycle	1.377e-05	0.0006927	264	1985
Cluster2	GO:1904951	positive regulation of establishment of protein localization	1.415e-05	0.0007081	70	403
Cluster2	GO:0048813	dendrite morphogenesis	1.444e-05	0.000719	41	198
Cluster2	GO:0045936	negative regulation of phosphate metabolic process	1.46e-05	0.0007234	80	478
Cluster2	GO:0099111	microtubule-based transport	1.525e-05	0.0007517	49	253
Cluster2	GO:0007015	actin filament organization	1.544e-05	0.0007573	84	509
Cluster2	GO:0009410	response to xenobiotic stimulus	1.635e-05	0.000798	86	525
Cluster2	GO:0048589	developmental growth	1.677e-05	0.0008145	135	911
Cluster2	GO:0010563	negative regulation of phosphorus metabolic process	1.703e-05	0.0008229	80	480
Cluster2	GO:0030307	positive regulation of cell growth	1.746e-05	0.0008395	43	213
Cluster2	GO:0051129	negative regulation of cellular component organization	1.801e-05	0.0008618	129	864
Cluster2	GO:0031334	positive regulation of protein-containing complex assembly	1.824e-05	0.0008683	45	227
Cluster2	GO:0060627	regulation of vesicle-mediated transport	1.968e-05	0.0009327	104	667
Cluster2	GO:0070848	response to growth factor	2.115e-05	0.0009975	131	883
Cluster2	GO:0035592	establishment of protein localization to extracellular region	2.138e-05	0.001004	80	483
Cluster2	GO:1902903	regulation of supramolecular fiber organization	2.176e-05	0.001017	74	438
Cluster2	GO:0006958	complement activation, classical pathway	2.232e-05	0.001038	15	44
Cluster2	GO:0099003	vesicle-mediated transport in synapse	2.339e-05	0.001083	58	321
Cluster2	GO:0050778	positive regulation of immune response	2.392e-05	0.001102	126	845
Cluster2	GO:0051050	positive regulation of transport	2.427e-05	0.001113	155	1081
Cluster2	GO:0006979	response to oxidative stress	2.596e-05	0.001185	79	478
Cluster2	GO:0050773	regulation of dendrite development	2.675e-05	0.001213	33	150
Cluster2	GO:0071375	cellular response to peptide hormone stimulus	2.682e-05	0.001213	66	381
Cluster2	GO:0000038	very long-chain fatty acid metabolic process	2.761e-05	0.001243	13	35
Cluster2	GO:0048284	organelle fusion	2.845e-05	0.001275	39	190
Cluster2	GO:0048639	positive regulation of developmental growth	2.891e-05	0.001289	46	238
Cluster2	GO:0051301	cell division	2.927e-05	0.001298	107	697
Cluster2	GO:0046854	phosphatidylinositol phosphate biosynthetic process	2.949e-05	0.001298	19	66
Cluster2	GO:0045022	early endosome to late endosome transport	2.95e-05	0.001298	16	50
Cluster2	GO:0036503	ERAD pathway	2.965e-05	0.001299	28	119
Cluster2	GO:0150094	amyloid-beta clearance by cellular catabolic process	3.01e-05	0.001304	6	8
Cluster2	GO:0009306	protein secretion	3.012e-05	0.001304	79	480
Cluster2	GO:0001933	negative regulation of protein phosphorylation	3.017e-05	0.001304	65	375
Cluster2	GO:0044088	regulation of vacuole organization	3.292e-05	0.001417	18	61
Cluster2	GO:0031400	negative regulation of protein modification process	3.347e-05	0.001428	83	512
Cluster2	GO:0031667	response to nutrient levels	3.353e-05	0.001428	90	566
Cluster2	GO:0010639	negative regulation of organelle organization	3.361e-05	0.001428	71	421
Cluster2	GO:0032956	regulation of actin cytoskeleton organization	3.448e-05	0.001459	66	384
Cluster2	GO:0034330	cell junction organization	3.55e-05	0.001495	141	974
Cluster2	GO:0071692	protein localization to extracellular region	3.585e-05	0.001504	80	490
Cluster2	GO:0062013	positive regulation of small molecule metabolic process	3.64e-05	0.001519	39	192
Cluster2	GO:0008333	endosome to lysosome transport	3.651e-05	0.001519	22	84
Cluster2	GO:0098876	vesicle-mediated transport to the plasma membrane	3.686e-05	0.001527	36	172
Cluster2	GO:0005975	carbohydrate metabolic process	3.79e-05	0.00156	100	646
Cluster2	GO:0051222	positive regulation of protein transport	3.798e-05	0.00156	57	319
Cluster2	GO:0043549	regulation of kinase activity	3.917e-05	0.001599	105	686
Cluster2	GO:0099536	synaptic signaling	3.926e-05	0.001599	141	976
Cluster2	GO:0042326	negative regulation of phosphorylation	4.091e-05	0.00166	68	401
Cluster2	GO:0051656	establishment of organelle localization	4.172e-05	0.001685	87	546
Cluster2	GO:0032868	response to insulin	4.189e-05	0.001685	60	342
Cluster2	GO:0002682	regulation of immune system process	4.353e-05	0.001732	243	1836
Cluster2	GO:0042325	regulation of phosphorylation	4.358e-05	0.001732	171	1226
Cluster2	GO:1901135	carbohydrate derivative metabolic process	4.358e-05	0.001732	171	1226
Cluster2	GO:0006900	vesicle budding from membrane	4.522e-05	0.00179	23	91
Cluster2	GO:0032386	regulation of intracellular transport	4.67e-05	0.001841	56	314
Cluster2	GO:0099022	vesicle tethering	5.029e-05	0.001975	12	32
Cluster2	GO:1904262	negative regulation of TORC1 signaling	5.071e-05	0.001983	16	52
Cluster2	GO:0003300	cardiac muscle hypertrophy	5.404e-05	0.0021	31	142
Cluster2	GO:0008088	axo-dendritic transport	5.412e-05	0.0021	24	98
Cluster2	GO:0045088	regulation of innate immune response	5.453e-05	0.002108	83	519
Cluster2	GO:0002221	pattern recognition receptor signaling pathway	5.485e-05	0.002112	53	294
Cluster2	GO:0035337	fatty-acyl-CoA metabolic process	5.545e-05	0.002127	14	42
Cluster2	GO:0120034	positive regulation of plasma membrane bounded cell projection assembly	5.586e-05	0.002134	28	123
Cluster2	GO:0010821	regulation of mitochondrion organization	5.645e-05	0.002148	34	162
Cluster2	GO:0097352	autophagosome maturation	5.803e-05	0.0022	19	69
Cluster2	GO:0080135	regulation of cellular response to stress	5.876e-05	0.002219	93	598
Cluster2	GO:0002684	positive regulation of immune system process	6.09e-05	0.002288	172	1242
Cluster2	GO:0045927	positive regulation of growth	6.105e-05	0.002288	59	339
Cluster2	GO:0051223	regulation of protein transport	6.31e-05	0.002356	88	560
Cluster2	GO:0032481	positive regulation of type I interferon production	6.398e-05	0.00238	21	81
Cluster2	GO:0043434	response to peptide hormone	6.796e-05	0.002518	84	530
Cluster2	GO:0002218	activation of innate immune response	6.865e-05	0.002534	58	333
Cluster2	GO:0006631	fatty acid metabolic process	6.974e-05	0.002565	75	461
Cluster2	GO:0071363	cellular response to growth factor stimulus	7.443e-05	0.002727	124	850
Cluster2	GO:0002758	innate immune response-activating signaling pathway	7.508e-05	0.002741	55	312
Cluster2	GO:0007417	central nervous system development	7.62e-05	0.002771	166	1197
Cluster2	GO:0034620	cellular response to unfolded protein	7.65e-05	0.002772	24	100
Cluster2	GO:0120032	regulation of plasma membrane bounded cell projection assembly	8.228e-05	0.002971	46	248
Cluster2	GO:1900034	regulation of cellular response to heat	8.363e-05	0.003008	8	16
Cluster2	GO:0007017	microtubule-based process	8.514e-05	0.003052	149	1058
Cluster2	GO:0001932	regulation of protein phosphorylation	8.599e-05	0.003071	158	1133
Cluster2	GO:1903530	regulation of secretion by cell	8.822e-05	0.00313	110	740
Cluster2	GO:0021549	cerebellum development	8.827e-05	0.00313	30	139
Cluster2	GO:0006887	exocytosis	9.021e-05	0.003187	71	434
Cluster2	GO:0040007	growth	9.237e-05	0.003252	170	1235
Cluster2	GO:0014897	striated muscle hypertrophy	9.374e-05	0.003288	31	146
Cluster2	GO:0045089	positive regulation of innate immune response	9.878e-05	0.003453	69	420
Cluster2	GO:0002833	positive regulation of response to biotic stimulus	0.000102	0.00355	73	451
Cluster2	GO:0042180	ketone metabolic process	0.0001023	0.00355	50	279
Cluster2	GO:0038127	ERBB signaling pathway	0.0001028	0.003555	33	160
Cluster2	GO:0045778	positive regulation of ossification	0.0001033	0.00356	18	66
Cluster2	GO:0001881	receptor recycling	0.0001075	0.003691	16	55
Cluster2	GO:0060491	regulation of cell projection assembly	0.0001106	0.003786	46	251
Cluster2	GO:0051046	regulation of secretion	0.0001119	0.003803	117	801
Cluster2	GO:0032008	positive regulation of TOR signaling	0.0001119	0.003803	20	78
Cluster2	GO:2000114	regulation of establishment of cell polarity	0.0001136	0.003846	10	25
Cluster2	GO:0097435	supramolecular fiber organization	0.0001149	0.003879	136	957
Cluster2	GO:2000785	regulation of autophagosome assembly	0.0001193	0.004008	15	50
Cluster2	GO:0006637	acyl-CoA metabolic process	0.0001202	0.004008	25	109
Cluster2	GO:0035383	thioester metabolic process	0.0001202	0.004008	25	109
Cluster2	GO:0032970	regulation of actin filament-based process	0.0001204	0.004008	71	438
Cluster2	GO:0014896	muscle hypertrophy	0.0001221	0.004052	31	148
Cluster2	GO:0038066	p38MAPK cascade	0.0001276	0.00422	18	67
Cluster2	GO:0030953	astral microtubule organization	0.000131	0.004304	7	13
Cluster2	GO:0010992	ubiquitin recycling	0.000131	0.004304	7	13
Cluster2	GO:0032608	interferon-beta production	0.0001328	0.004335	19	73
Cluster2	GO:0032648	regulation of interferon-beta production	0.0001328	0.004335	19	73
Cluster2	GO:0050776	regulation of immune response	0.0001357	0.004397	151	1085
Cluster2	GO:0034198	cellular response to amino acid starvation	0.000136	0.004397	16	56
Cluster2	GO:0006699	bile acid biosynthetic process	0.0001365	0.004397	13	40
Cluster2	GO:0097242	amyloid-beta clearance	0.0001365	0.004397	13	40
Cluster2	GO:0045724	positive regulation of cilium assembly	0.0001379	0.004429	12	35
Cluster2	GO:1902904	negative regulation of supramolecular fiber organization	0.0001433	0.004568	38	197
Cluster2	GO:0061025	membrane fusion	0.0001435	0.004568	40	211
Cluster2	GO:0000910	cytokinesis	0.0001437	0.004568	39	204
Cluster2	GO:0006639	acylglycerol metabolic process	0.0001445	0.004579	32	156
Cluster2	GO:0016032	viral process	0.0001473	0.004655	74	464
Cluster2	GO:0047496	vesicle transport along microtubule	0.0001528	0.004813	15	51
Cluster2	GO:0007623	circadian rhythm	0.0001654	0.005191	45	248
Cluster2	GO:0055082	intracellular chemical homeostasis	0.0001661	0.005198	124	866
Cluster2	GO:0043244	regulation of protein-containing complex disassembly	0.0001723	0.005374	30	144
Cluster2	GO:0051338	regulation of transferase activity	0.0001771	0.005507	117	810
Cluster2	GO:0110053	regulation of actin filament organization	0.0001797	0.005571	52	300
Cluster2	GO:0046460	neutral lipid biosynthetic process	0.0001837	0.005654	17	63
Cluster2	GO:0046463	acylglycerol biosynthetic process	0.0001837	0.005654	17	63
Cluster2	GO:0032801	receptor catabolic process	0.0001842	0.005654	11	31
Cluster2	GO:0006638	neutral lipid metabolic process	0.0001849	0.005654	32	158
Cluster2	GO:1901615	organic hydroxy compound metabolic process	0.0001853	0.005654	96	641
Cluster2	GO:0170041	non-proteinogenic amino acid metabolic process	0.0001924	0.005854	21	87
Cluster2	GO:0019432	triglyceride biosynthetic process	0.0001942	0.005885	15	52
Cluster2	GO:0070201	regulation of establishment of protein localization	0.0001948	0.005885	100	674
Cluster2	GO:0098930	axonal transport	0.0001952	0.005885	19	75
Cluster2	GO:0022402	cell cycle process	0.0002015	0.006056	192	1441
Cluster2	GO:0007040	lysosome organization	0.0002057	0.006146	26	119
Cluster2	GO:0080171	lytic vacuole organization	0.0002057	0.006146	26	119
Cluster2	GO:0048667	cell morphogenesis involved in neuron differentiation	0.000208	0.006193	109	748
Cluster2	GO:0038179	neurotrophin signaling pathway	0.000217	0.006442	14	47
Cluster2	GO:0042760	very long-chain fatty acid catabolic process	0.0002176	0.006442	5	7
Cluster2	GO:0030902	hindbrain development	0.0002187	0.006454	39	208
Cluster2	GO:0030522	intracellular receptor signaling pathway	0.0002228	0.006554	67	416
Cluster2	GO:0022037	metencephalon development	0.0002294	0.006712	31	153
Cluster2	GO:0050790	regulation of catalytic activity	0.0002295	0.006712	226	1737
Cluster2	GO:0099537	trans-synaptic signaling	0.0002313	0.00673	132	939
Cluster2	GO:0007005	mitochondrion organization	0.0002314	0.00673	89	589
Cluster2	GO:0006893	Golgi to plasma membrane transport	0.000233	0.006733	18	70
Cluster2	GO:0006956	complement activation	0.000233	0.006733	18	70
Cluster2	GO:0098916	anterograde trans-synaptic signaling	0.0002343	0.006733	131	931
Cluster2	GO:0007268	chemical synaptic transmission	0.0002343	0.006733	131	931
Cluster2	GO:0061572	actin filament bundle organization	0.0002451	0.007024	37	195
Cluster2	GO:0048858	cell projection morphogenesis	0.00026	0.00743	118	826
Cluster2	GO:0006605	protein targeting	0.0002752	0.00784	61	373
Cluster2	GO:0090148	membrane fission	0.0002772	0.007875	14	48
Cluster2	GO:0030036	actin cytoskeleton organization	0.0002813	0.007967	115	803
Cluster2	GO:0032103	positive regulation of response to external stimulus	0.0002867	0.008097	107	738
Cluster2	GO:0032370	positive regulation of lipid transport	0.000288	0.008112	23	102
Cluster2	GO:1903008	organelle disassembly	0.0002997	0.008415	38	204
Cluster2	GO:0070507	regulation of microtubule cytoskeleton organization	0.0003032	0.008467	34	176
Cluster2	GO:0051726	regulation of cell cycle	0.0003032	0.008467	169	1256
Cluster2	GO:0140694	membraneless organelle assembly	0.0003042	0.008472	74	475
Cluster2	GO:0006513	protein monoubiquitination	0.0003068	0.008516	15	54
Cluster2	GO:0090066	regulation of anatomical structure size	0.0003076	0.008516	92	618
Cluster2	GO:0034032	purine nucleoside bisphosphate metabolic process	0.0003126	0.008582	29	142
Cluster2	GO:0033865	nucleoside bisphosphate metabolic process	0.0003126	0.008582	29	142
Cluster2	GO:0033875	ribonucleoside bisphosphate metabolic process	0.0003126	0.008582	29	142
Cluster2	GO:0048638	regulation of developmental growth	0.0003145	0.008611	67	421
Cluster2	GO:0009790	embryo development	0.0003252	0.008879	190	1437
Cluster2	GO:0007507	heart development	0.000328	0.008931	109	757
Cluster2	GO:0048814	regulation of dendrite morphogenesis	0.0003347	0.009068	23	103
Cluster2	GO:0007254	JNK cascade	0.0003349	0.009068	37	198
Cluster2	GO:0051017	actin filament bundle assembly	0.0003372	0.009107	36	191
Cluster2	GO:0014070	response to organic cyclic compound	0.0003418	0.00918	144	1048
Cluster2	GO:0022603	regulation of anatomical structure morphogenesis	0.0003418	0.00918	149	1090
Cluster2	GO:0030031	cell projection assembly	0.0003504	0.009386	100	685
Cluster2	GO:0072384	organelle transport along microtubule	0.0003545	0.009471	22	97
Cluster2	GO:0120031	plasma membrane bounded cell projection assembly	0.0003734	0.009897	98	670
Cluster2	GO:0043500	muscle adaptation	0.0003735	0.009897	32	164
Cluster2	GO:0002065	columnar/cuboidal epithelial cell differentiation	0.0003735	0.009897	32	164
Cluster2	GO:0008206	bile acid metabolic process	0.0003815	0.01004	15	55
Cluster2	GO:0045773	positive regulation of axon extension	0.0003815	0.01004	15	55
Cluster2	GO:0046777	protein autophosphorylation	0.000382	0.01004	41	228
Cluster2	GO:0048812	neuron projection morphogenesis	0.0003979	0.01043	114	802
Cluster2	GO:1990928	response to amino acid starvation	0.0003999	0.01046	16	61
Cluster2	GO:0034599	cellular response to oxidative stress	0.000407	0.01061	50	295
Cluster2	GO:0033673	negative regulation of kinase activity	0.0004091	0.01064	42	236
Cluster2	GO:0032101	regulation of response to external stimulus	0.0004243	0.01101	175	1316
Cluster2	GO:0046626	regulation of insulin receptor signaling pathway	0.0004362	0.01128	21	92
Cluster2	GO:0048015	phosphatidylinositol-mediated signaling	0.0004436	0.01145	9	24
Cluster2	GO:0030900	forebrain development	0.0004461	0.01148	75	489
Cluster2	GO:1905475	regulation of protein localization to membrane	0.0004479	0.01148	42	237
Cluster2	GO:1901879	regulation of protein depolymerization	0.0004484	0.01148	23	105
Cluster2	GO:0051960	regulation of nervous system development	0.0004503	0.0115	92	625
Cluster2	GO:0051494	negative regulation of cytoskeleton organization	0.0004587	0.01168	36	194
Cluster2	GO:0044419	biological process involved in interspecies interaction between organisms	0.0004854	0.01232	253	1996
Cluster2	GO:0002011	morphogenesis of an epithelial sheet	0.0004867	0.01232	18	74
Cluster2	GO:0002455	humoral immune response mediated by circulating immunoglobulin	0.0004873	0.01232	16	62
Cluster2	GO:0007173	epidermal growth factor receptor signaling pathway	0.0004961	0.01251	28	139
Cluster2	GO:0015914	phospholipid transport	0.0005169	0.01296	23	106
Cluster2	GO:0043122	regulation of canonical NF-kappaB signal transduction	0.0005169	0.01296	50	298
Cluster2	GO:0007610	behavior	0.0005283	0.01313	124	891
Cluster2	GO:0032909	regulation of transforming growth factor beta2 production	0.0005302	0.01313	5	8
Cluster2	GO:0032906	transforming growth factor beta2 production	0.0005302	0.01313	5	8
Cluster2	GO:0070973	protein localization to endoplasmic reticulum exit site	0.0005302	0.01313	5	8
Cluster2	GO:0036115	fatty-acyl-CoA catabolic process	0.0005302	0.01313	5	8
Cluster2	GO:0150104	transport across blood-brain barrier	0.0005362	0.01325	20	87
Cluster2	GO:0043502	regulation of muscle adaptation	0.0005457	0.01331	27	133
Cluster2	GO:0002062	chondrocyte differentiation	0.0005457	0.01331	27	133
Cluster2	GO:2000436	positive regulation of protein neddylation	0.0005457	0.01331	4	5
Cluster2	GO:0090425	acinar cell differentiation	0.0005457	0.01331	4	5
Cluster2	GO:0046967	cytosol to endoplasmic reticulum transport	0.0005457	0.01331	4	5
Cluster2	GO:0023061	signal release	0.0005468	0.01331	95	653
Cluster2	GO:0043242	negative regulation of protein-containing complex disassembly	0.0005546	0.01346	22	100
Cluster2	GO:1901550	regulation of endothelial cell development	0.0005578	0.01348	8	20
Cluster2	GO:1903140	regulation of establishment of endothelial barrier	0.0005578	0.01348	8	20
Cluster2	GO:0006901	vesicle coating	0.0005627	0.01354	12	40
Cluster2	GO:0048511	rhythmic process	0.0005632	0.01354	58	360
Cluster2	GO:0071407	cellular response to organic cyclic compound	0.0005646	0.01354	89	605
Cluster2	GO:0031647	regulation of protein stability	0.0005753	0.01376	59	368
Cluster2	GO:0007249	canonical NF-kappaB signal transduction	0.0005889	0.01406	54	330
Cluster2	GO:0030155	regulation of cell adhesion	0.000592	0.01409	128	927
Cluster2	GO:0120039	plasma membrane bounded cell projection morphogenesis	0.0005973	0.01419	115	819
Cluster2	GO:0017157	regulation of exocytosis	0.0006026	0.01428	41	233
Cluster2	GO:0010232	vascular transport	0.0006269	0.01481	20	88
Cluster2	GO:0000422	autophagy of mitochondrion	0.0006282	0.01481	24	114
Cluster2	GO:0060996	dendritic spine development	0.0006296	0.01481	28	141
Cluster2	GO:0031401	positive regulation of protein modification process	0.0006345	0.01483	129	937
Cluster2	GO:0097484	dendrite extension	0.0006351	0.01483	13	46
Cluster2	GO:0006458	'de novo' protein folding	0.0006351	0.01483	13	46
Cluster2	GO:0030029	actin filament-based process	0.0006371	0.01485	126	912
Cluster2	GO:0032878	regulation of establishment or maintenance of cell polarity	0.0006402	0.01488	10	30
Cluster2	GO:0006281	DNA repair	0.000642	0.01489	94	648
Cluster2	GO:0006470	protein dephosphorylation	0.0006502	0.01504	44	256
Cluster2	GO:0048588	developmental cell growth	0.0006526	0.01506	50	301
Cluster2	GO:0030242	autophagy of peroxisome	0.0006577	0.01511	7	16
Cluster2	GO:0043201	response to L-leucine	0.0006577	0.01511	7	16
Cluster2	GO:0016311	dephosphorylation	0.0006658	0.01526	56	347
Cluster2	GO:0007044	cell-substrate junction assembly	0.0006818	0.01545	23	108
Cluster2	GO:1902017	regulation of cilium assembly	0.0006818	0.01545	23	108
Cluster2	GO:0009615	response to virus	0.000682	0.01545	66	425
Cluster2	GO:0061723	glycophagy	0.0006851	0.01545	6	12
Cluster2	GO:0099105	ion channel modulating, G protein-coupled receptor signaling pathway	0.0006851	0.01545	6	12
Cluster2	GO:0005984	disaccharide metabolic process	0.0006851	0.01545	6	12
Cluster2	GO:0033540	fatty acid beta-oxidation using acyl-CoA oxidase	0.0006851	0.01545	6	12
Cluster2	GO:0045893	positive regulation of DNA-templated transcription	0.0006949	0.01564	232	1824
Cluster2	GO:0150115	cell-substrate junction organization	0.0007165	0.01607	24	115
Cluster2	GO:0002757	immune response-activating signaling pathway	0.0007171	0.01607	82	553
Cluster2	GO:0051084	'de novo' post-translational protein folding	0.0007207	0.01611	12	41
Cluster2	GO:1901880	negative regulation of protein depolymerization	0.0007304	0.01629	20	89
Cluster2	GO:1902680	positive regulation of RNA biosynthetic process	0.0007605	0.01692	232	1827
Cluster2	GO:0006469	negative regulation of protein kinase activity	0.0007628	0.01693	39	221
Cluster2	GO:1905954	positive regulation of lipid localization	0.0007666	0.01698	26	129
Cluster2	GO:0051348	negative regulation of transferase activity	0.0007705	0.01703	46	273
Cluster2	GO:0042147	retrograde transport, endosome to Golgi	0.0007802	0.0172	23	109
Cluster2	GO:0032728	positive regulation of interferon-beta production	0.000795	0.01749	13	47
Cluster2	GO:0034063	stress granule assembly	0.0007993	0.01755	11	36
Cluster2	GO:0018209	peptidyl-serine modification	0.0008047	0.01761	52	319
Cluster2	GO:0007420	brain development	0.0008056	0.01761	119	859
Cluster2	GO:0051788	response to misfolded protein	0.0008189	0.01786	8	21
Cluster2	GO:0032365	intracellular lipid transport	0.0008385	0.01825	14	53
Cluster2	GO:0043087	regulation of GTPase activity	0.0008449	0.01834	54	335
Cluster2	GO:0060322	head development	0.0008561	0.01855	126	919
Cluster2	GO:1905477	positive regulation of protein localization to membrane	0.0008647	0.01869	26	130
Cluster2	GO:0006515	protein quality control for misfolded or incompletely synthesized proteins	0.0008739	0.01885	9	26
Cluster2	GO:0043491	phosphatidylinositol 3-kinase/protein kinase B signal transduction	0.0008776	0.01889	60	382
Cluster2	GO:0090174	organelle membrane fusion	0.0008889	0.01905	28	144
Cluster2	GO:0051261	protein depolymerization	0.0008889	0.01905	28	144
Cluster2	GO:0010611	regulation of cardiac muscle hypertrophy	0.0009141	0.01955	21	97
Cluster2	GO:0050994	regulation of lipid catabolic process	0.0009499	0.02027	18	78
Cluster2	GO:0000165	MAPK cascade	0.0009531	0.02029	127	930
Cluster2	GO:0031347	regulation of defense response	0.0009578	0.02035	136	1006
Cluster2	GO:0030832	regulation of actin filament length	0.00096	0.02035	33	180
Cluster2	GO:0000302	response to reactive oxygen species	0.0009751	0.02063	42	246
Cluster2	GO:0050890	cognition	0.0009839	0.02077	65	423
Cluster2	GO:0032957	inositol trisphosphate metabolic process	0.001018	0.02126	7	17
Cluster2	GO:0006491	N-glycan processing	0.001018	0.02126	7	17
Cluster2	GO:0010635	regulation of mitochondrial fusion	0.001018	0.02126	7	17
Cluster2	GO:0014029	neural crest formation	0.001018	0.02126	7	17
Cluster2	GO:0030042	actin filament depolymerization	0.00102	0.02126	16	66
Cluster2	GO:0018105	peptidyl-serine phosphorylation	0.001022	0.02126	50	307
Cluster2	GO:0010613	positive regulation of cardiac muscle hypertrophy	0.001025	0.02126	14	54
Cluster2	GO:0032480	negative regulation of type I interferon production	0.001025	0.02126	14	54
Cluster2	GO:0043162	ubiquitin-dependent protein catabolic process via the multivesicular body sorting pathway	0.001031	0.02131	11	37
Cluster2	GO:0016601	Rac protein signal transduction	0.001033	0.02131	15	60
Cluster2	GO:0021587	cerebellum morphogenesis	0.001033	0.02131	15	60
Cluster2	GO:0007009	plasma membrane organization	0.001038	0.02132	34	188
Cluster2	GO:0002753	cytoplasmic pattern recognition receptor signaling pathway	0.001038	0.02132	34	188
Cluster2	GO:0018210	peptidyl-threonine modification	0.001076	0.02205	25	125
Cluster2	GO:0008361	regulation of cell size	0.001084	0.02216	39	225
Cluster2	GO:1990456	mitochondrion-endoplasmic reticulum membrane tethering	0.00109	0.0222	5	9
Cluster2	GO:0099547	regulation of translation at synapse, modulating synaptic transmission	0.00109	0.0222	5	9
Cluster2	GO:0140895	cell surface toll-like receptor signaling pathway	0.001112	0.0226	18	79
Cluster2	GO:1902905	positive regulation of supramolecular fiber organization	0.001115	0.02261	35	196
Cluster2	GO:0031503	protein-containing complex localization	0.001138	0.02276	46	278
Cluster2	GO:0055086	nucleobase-containing small molecule metabolic process	0.00114	0.02276	107	767
Cluster2	GO:0043420	anthranilate metabolic process	0.001141	0.02276	3	3
Cluster2	GO:0061847	response to cholecystokinin	0.001141	0.02276	3	3
Cluster2	GO:0060466	activation of meiosis involved in egg activation	0.001141	0.02276	3	3
Cluster2	GO:0015675	nickel cation transport	0.001141	0.02276	3	3
Cluster2	GO:0000023	maltose metabolic process	0.001141	0.02276	3	3
Cluster2	GO:0070650	actin filament bundle distribution	0.001141	0.02276	3	3
Cluster2	GO:0046329	negative regulation of JNK cascade	0.001149	0.02283	12	43
Cluster2	GO:0021955	central nervous system neuron axonogenesis	0.001149	0.02283	12	43
Cluster2	GO:1902857	positive regulation of non-motile cilium assembly	0.00116	0.02296	6	13
Cluster2	GO:0060430	lung saccule development	0.00116	0.02296	6	13
Cluster2	GO:0046942	carboxylic acid transport	0.001167	0.02305	63	410
Cluster2	GO:0036092	phosphatidylinositol-3-phosphate biosynthetic process	0.00117	0.02305	8	22
Cluster2	GO:0045859	regulation of protein kinase activity	0.001171	0.02305	88	611
Cluster2	GO:0072521	purine-containing compound metabolic process	0.001175	0.02307	93	652
Cluster2	GO:0019058	viral life cycle	0.001195	0.02342	54	340
Cluster2	GO:0021954	central nervous system neuron development	0.001205	0.02356	21	99
Cluster2	GO:0030834	regulation of actin filament depolymerization	0.00124	0.02411	15	61
Cluster2	GO:0046578	regulation of Ras protein signal transduction	0.00124	0.02411	15	61
Cluster2	GO:0099504	synaptic vesicle cycle	0.001241	0.02411	44	264
Cluster2	GO:0014742	positive regulation of muscle hypertrophy	0.001244	0.02411	14	55
Cluster2	GO:0035264	multicellular organism growth	0.001245	0.02411	42	249
Cluster2	GO:0050767	regulation of neurogenesis	0.001258	0.02432	76	515
Cluster2	GO:0060429	epithelium development	0.001285	0.02479	189	1469
Cluster2	GO:0051495	positive regulation of cytoskeleton organization	0.001301	0.02504	36	205
Cluster2	GO:0000041	transition metal ion transport	0.001307	0.0251	23	113
Cluster2	GO:0015849	organic acid transport	0.001319	0.0253	63	412
Cluster2	GO:0050804	modulation of chemical synaptic transmission	0.001342	0.02568	94	663
Cluster2	GO:0032388	positive regulation of intracellular transport	0.001352	0.02583	30	162
Cluster2	GO:0106027	neuron projection organization	0.001362	0.02596	25	127
Cluster2	GO:0014743	regulation of muscle hypertrophy	0.001378	0.02622	21	100
Cluster2	GO:0099177	regulation of trans-synaptic signaling	0.001406	0.02671	94	664
Cluster2	GO:0045934	negative regulation of nucleobase-containing compound metabolic process	0.001426	0.02703	212	1673
Cluster2	GO:0051647	nucleus localization	0.001432	0.02709	12	44
Cluster2	GO:0008064	regulation of actin polymerization or depolymerization	0.001442	0.02722	32	177
Cluster2	GO:0070841	inclusion body assembly	0.001473	0.02776	10	33
Cluster2	GO:0120193	tight junction organization	0.001498	0.02795	20	94
Cluster2	GO:1903792	negative regulation of monoatomic anion transport	0.001501	0.02795	4	6
Cluster2	GO:0019805	quinolinate biosynthetic process	0.001501	0.02795	4	6
Cluster2	GO:0006578	amino-acid betaine biosynthetic process	0.001501	0.02795	4	6
Cluster2	GO:1903903	regulation of establishment of T cell polarity	0.001501	0.02795	4	6
Cluster2	GO:1904263	positive regulation of TORC1 signaling	0.001502	0.02795	14	56
Cluster2	GO:0034605	cellular response to heat	0.001508	0.02795	18	81
Cluster2	GO:0060997	dendritic spine morphogenesis	0.001508	0.02795	18	81
Cluster2	GO:0009408	response to heat	0.001508	0.02795	24	121
Cluster2	GO:0006895	Golgi to endosome transport	0.001516	0.02802	7	18
Cluster2	GO:0043547	positive regulation of GTPase activity	0.001521	0.02802	41	244
Cluster2	GO:0009755	hormone-mediated signaling pathway	0.001521	0.02802	41	244
Cluster2	GO:0007265	Ras protein signal transduction	0.001528	0.02809	25	128
Cluster2	GO:0006906	vesicle fusion	0.001537	0.02821	27	142
Cluster2	GO:0099173	postsynapse organization	0.001566	0.02869	50	313
Cluster2	GO:0000423	mitophagy	0.001603	0.02926	17	75
Cluster2	GO:0150116	regulation of cell-substrate junction organization	0.001603	0.02926	17	75
Cluster2	GO:1904375	regulation of protein localization to cell periphery	0.00162	0.02951	31	171
Cluster2	GO:0098780	response to mitochondrial depolarisation	0.001631	0.02955	8	23
Cluster2	GO:1902774	late endosome to lysosome transport	0.001631	0.02955	8	23
Cluster2	GO:0090201	negative regulation of release of cytochrome c from mitochondria	0.001631	0.02955	8	23
Cluster2	GO:0140546	defense response to symbiont	0.001642	0.0297	167	1286
Cluster2	GO:0007266	Rho protein signal transduction	0.00165	0.0298	30	164
Cluster2	GO:0097061	dendritic spine organization	0.001668	0.03001	23	115
Cluster2	GO:0018107	peptidyl-threonine phosphorylation	0.001668	0.03001	23	115
Cluster2	GO:0010770	positive regulation of cell morphogenesis	0.001689	0.03027	16	69
Cluster2	GO:0002066	columnar/cuboidal epithelial cell development	0.001689	0.03027	16	69
Cluster2	GO:0050808	synapse organization	0.001729	0.03089	96	685
Cluster2	GO:0060560	developmental growth involved in morphogenesis	0.00173	0.03089	48	299
Cluster2	GO:0062197	cellular response to chemical stress	0.001736	0.03094	58	377
Cluster2	GO:0032892	positive regulation of organic acid transport	0.001758	0.03128	15	63
Cluster2	GO:1905898	positive regulation of response to endoplasmic reticulum stress	0.001769	0.03142	12	45
Cluster2	GO:0032271	regulation of protein polymerization	0.001787	0.03162	39	231
Cluster2	GO:0006109	regulation of carbohydrate metabolic process	0.001787	0.03162	39	231
Cluster2	GO:0009792	embryo development ending in birth or egg hatching	0.001794	0.03169	125	929
Cluster2	GO:1904350	regulation of protein catabolic process in the vacuole	0.001851	0.03264	6	14
Cluster2	GO:0000226	microtubule cytoskeleton organization	0.001872	0.03295	100	720
Cluster2	GO:0072676	lymphocyte migration	0.001879	0.03302	23	116
Cluster2	GO:1900101	regulation of endoplasmic reticulum unfolded protein response	0.001894	0.0331	10	34
Cluster2	GO:0007097	nuclear migration	0.001894	0.0331	10	34
Cluster2	GO:0048011	neurotrophin TRK receptor signaling pathway	0.001894	0.0331	10	34
Cluster2	GO:0021915	neural tube development	0.001906	0.03326	35	202
Cluster2	GO:0051897	positive regulation of phosphatidylinositol 3-kinase/protein kinase B signal transduction	0.001931	0.03363	37	217
Cluster2	GO:0051893	regulation of focal adhesion assembly	0.001981	0.03437	16	70
Cluster2	GO:0090109	regulation of cell-substrate junction assembly	0.001981	0.03437	16	70
Cluster2	GO:1903050	regulation of proteolysis involved in protein catabolic process	0.001987	0.03437	42	255
Cluster2	GO:0031349	positive regulation of defense response	0.001987	0.03437	84	589
Cluster2	GO:0042063	gliogenesis	0.002	0.03453	65	435
Cluster2	GO:0070374	positive regulation of ERK1 and ERK2 cascade	0.002009	0.03462	40	240
Cluster2	GO:0060976	coronary vasculature development	0.002016	0.03468	18	83
Cluster2	GO:0021575	hindbrain morphogenesis	0.002078	0.03569	15	64
Cluster2	GO:2000193	positive regulation of fatty acid transport	0.002098	0.03585	9	29
Cluster2	GO:0032042	mitochondrial DNA metabolic process	0.002098	0.03585	9	29
Cluster2	GO:0071577	zinc ion transmembrane transport	0.002098	0.03585	9	29
Cluster2	GO:1903532	positive regulation of secretion by cell	0.002111	0.03599	61	404
Cluster2	GO:0018193	peptidyl-amino acid modification	0.00213	0.03627	130	976
Cluster2	GO:0035265	organ growth	0.002142	0.03641	42	256
Cluster2	GO:0090207	regulation of triglyceride metabolic process	0.002151	0.03644	14	58
Cluster2	GO:0061028	establishment of endothelial barrier	0.002151	0.03644	14	58
Cluster2	GO:0071218	cellular response to misfolded protein	0.002185	0.03679	7	19
Cluster2	GO:0006957	complement activation, alternative pathway	0.002185	0.03679	7	19
Cluster2	GO:0034134	toll-like receptor 2 signaling pathway	0.002185	0.03679	7	19
Cluster2	GO:1900744	regulation of p38MAPK cascade	0.002187	0.03679	13	52
Cluster2	GO:0051248	negative regulation of protein metabolic process	0.0022	0.03694	143	1088
Cluster2	GO:0045056	transcytosis	0.002224	0.03716	8	24
Cluster2	GO:0008090	retrograde axonal transport	0.002224	0.03716	8	24
Cluster2	GO:0031998	regulation of fatty acid beta-oxidation	0.002224	0.03716	8	24
Cluster2	GO:0048041	focal adhesion assembly	0.002228	0.03717	20	97
Cluster2	GO:0030335	positive regulation of cell migration	0.002261	0.03764	96	691
Cluster2	GO:0016049	cell growth	0.002297	0.03814	88	625
Cluster2	GO:0050708	regulation of protein secretion	0.002298	0.03814	54	350
Cluster2	GO:0034142	toll-like receptor 4 signaling pathway	0.002313	0.03832	16	71
Cluster2	GO:0015800	acidic amino acid transport	0.00232	0.03837	18	84
Cluster2	GO:0046928	regulation of neurotransmitter secretion	0.00237	0.03913	23	118
Cluster2	GO:0015908	fatty acid transport	0.002376	0.03916	25	132
Cluster2	GO:1903859	regulation of dendrite extension	0.002406	0.03947	10	35
Cluster2	GO:0016242	negative regulation of macroautophagy	0.002406	0.03947	10	35
Cluster2	GO:0019068	virion assembly	0.002406	0.03947	10	35
Cluster2	GO:0060998	regulation of dendritic spine development	0.00244	0.03995	19	91
Cluster2	GO:0034329	cell junction assembly	0.002486	0.04063	81	569
Cluster2	GO:0040008	regulation of growth	0.002499	0.04078	106	777
Cluster2	GO:1905515	non-motile cilium assembly	0.002507	0.04085	17	78
Cluster2	GO:0010564	regulation of cell cycle process	0.002555	0.04156	114	845
Cluster2	GO:0006516	glycoprotein catabolic process	0.002577	0.0418	11	41
Cluster2	GO:0030278	regulation of ossification	0.002579	0.0418	27	147
Cluster2	GO:0048708	astrocyte differentiation	0.002594	0.04191	21	105
Cluster2	GO:0045913	positive regulation of carbohydrate metabolic process	0.002594	0.04191	21	105
Cluster2	GO:0008202	steroid metabolic process	0.002643	0.04263	57	376
Cluster2	GO:0030968	endoplasmic reticulum unfolded protein response	0.002662	0.04287	18	85
Cluster2	GO:0006829	zinc ion transport	0.002723	0.04372	9	30
Cluster2	GO:0046856	phosphatidylinositol dephosphorylation	0.002723	0.04372	9	30
Cluster2	GO:0098542	defense response to other organism	0.002792	0.04475	179	1407
Cluster2	GO:0048598	embryonic morphogenesis	0.002842	0.04548	98	713
Cluster2	GO:1903052	positive regulation of proteolysis involved in protein catabolic process	0.002847	0.04548	27	148
Cluster2	GO:0001952	regulation of cell-matrix adhesion	0.002895	0.04616	26	141
Cluster2	GO:1990138	neuron projection extension	0.002899	0.04616	35	207
Cluster2	GO:0042593	glucose homeostasis	0.002906	0.0462	52	338
Cluster2	GO:0003279	cardiac septum development	0.002932	0.04654	25	134
Cluster2	GO:0034504	protein localization to nucleus	0.002956	0.04685	55	362
Cluster2	GO:1901222	regulation of non-canonical NF-kappaB signal transduction	0.002965	0.04691	23	120
Cluster2	GO:0099175	regulation of postsynapse organization	0.002982	0.04711	32	185
Cluster2	GO:0009251	glucan catabolic process	0.003025	0.0477	10	36
Cluster2	GO:2000786	positive regulation of autophagosome assembly	0.003062	0.04821	7	20
Cluster2	GO:0033500	carbohydrate homeostasis	0.003092	0.04861	52	339
Cluster2	GO:0051047	positive regulation of secretion	0.003123	0.04902	64	435
Cluster2	GO:0046627	negative regulation of insulin receptor signaling pathway	0.003133	0.04902	13	54
Cluster2	GO:0045663	positive regulation of myoblast differentiation	0.003133	0.04902	13	54
Cluster2	GO:0050807	regulation of synapse organization	0.003156	0.0493	58	387
Cluster2	GO:0045216	cell-cell junction organization	0.003165	0.04932	40	246
Cluster2	GO:0000002	mitochondrial genome maintenance	0.003167	0.04932	11	42
Cluster2	GO:1903580	positive regulation of ATP metabolic process	0.003192	0.04939	12	48
Cluster2	GO:0042149	cellular response to glucose starvation	0.003192	0.04939	12	48
Cluster2	GO:0090224	regulation of spindle organization	0.003192	0.04939	12	48
Cluster2	GO:0150093	amyloid-beta clearance by transcytosis	0.003212	0.04939	4	7
Cluster2	GO:0061734	type 2 mitophagy	0.003212	0.04939	4	7
Cluster2	GO:1904352	positive regulation of protein catabolic process in the vacuole	0.003212	0.04939	4	7
Cluster2	GO:0010636	positive regulation of mitochondrial fusion	0.003212	0.04939	4	7
Cluster2	GO:0046874	quinolinate metabolic process	0.003212	0.04939	4	7
Cluster3	GO:0046907	intracellular transport	3.365e-23	3.104e-19	256	1496
Cluster3	GO:0044248	cellular catabolic process	1.136e-17	5.239e-14	209	1253
Cluster3	GO:0045184	establishment of protein localization	1.994e-16	6.13e-13	287	1945
Cluster3	GO:0015031	protein transport	5.382e-16	1.24e-12	247	1615
Cluster3	GO:0009057	macromolecule catabolic process	6.724e-16	1.24e-12	249	1635
Cluster3	GO:0009894	regulation of catabolic process	4.501e-14	6.919e-11	197	1252
Cluster3	GO:0030163	protein catabolic process	4.522e-13	5.958e-10	177	1115
Cluster3	GO:0006886	intracellular protein transport	5.84e-13	6.733e-10	130	740
Cluster3	GO:0016192	vesicle-mediated transport	3.1e-12	2.935e-09	251	1778
Cluster3	GO:0043632	modification-dependent macromolecule catabolic process	3.182e-12	2.935e-09	117	656
Cluster3	GO:0019941	modification-dependent protein catabolic process	4.207e-12	3.527e-09	116	651
Cluster3	GO:0051603	proteolysis involved in protein catabolic process	6.117e-12	4.701e-09	136	812
Cluster3	GO:0006511	ubiquitin-dependent protein catabolic process	6.632e-12	4.705e-09	114	640
Cluster3	GO:0061919	process utilizing autophagic mechanism	1.827e-11	1.123e-08	114	650
Cluster3	GO:0006914	autophagy	1.827e-11	1.123e-08	114	650
Cluster3	GO:0048193	Golgi vesicle transport	4.801e-11	2.767e-08	71	339
Cluster3	GO:0045893	positive regulation of DNA-templated transcription	2.02e-10	1.047e-07	248	1824
Cluster3	GO:0010506	regulation of autophagy	2.044e-10	1.047e-07	78	400
Cluster3	GO:1902680	positive regulation of RNA biosynthetic process	2.376e-10	1.154e-07	248	1827
Cluster3	GO:0019637	organophosphate metabolic process	2.692e-10	1.241e-07	170	1142
Cluster3	GO:0043687	post-translational protein modification	8.878e-10	3.899e-07	160	1074
Cluster3	GO:0070647	protein modification by small protein conjugation or removal	1.987e-09	8.33e-07	151	1009
Cluster3	GO:0033365	protein localization to organelle	2.777e-09	1.114e-06	160	1091
Cluster3	GO:0016197	endosomal transport	7.6e-09	2.921e-06	63	320
Cluster3	GO:0010498	proteasomal protein catabolic process	1e-08	3.636e-06	95	567
Cluster3	GO:0016236	macroautophagy	1.025e-08	3.636e-06	70	374
Cluster3	GO:0002221	pattern recognition receptor signaling pathway	1.09e-08	3.723e-06	59	294
Cluster3	GO:0006508	proteolysis	1.323e-08	4.358e-06	240	1833
Cluster3	GO:0009895	negative regulation of catabolic process	2.016e-08	6.41e-06	75	418
Cluster3	GO:0006091	generation of precursor metabolites and energy	2.403e-08	7.388e-06	89	529
Cluster3	GO:0002218	activation of innate immune response	3.658e-08	1.088e-05	63	333
Cluster3	GO:0002758	innate immune response-activating signaling pathway	4.184e-08	1.206e-05	60	312
Cluster3	GO:0045089	positive regulation of innate immune response	5.43e-08	1.518e-05	74	420
Cluster3	GO:0016567	protein ubiquitination	5.61e-08	1.522e-05	122	811
Cluster3	GO:0022613	ribonucleoprotein complex biogenesis	5.84e-08	1.539e-05	86	515
Cluster3	GO:0060341	regulation of cellular localization	6.206e-08	1.583e-05	168	1212
Cluster3	GO:0045934	negative regulation of nucleobase-containing compound metabolic process	6.351e-08	1.583e-05	219	1673
Cluster3	GO:0034504	protein localization to nucleus	7.586e-08	1.841e-05	66	362
Cluster3	GO:0002833	positive regulation of response to biotic stimulus	1.136e-07	2.686e-05	77	451
Cluster3	GO:0001701	in utero embryonic development	1.177e-07	2.715e-05	95	596
Cluster3	GO:0051253	negative regulation of RNA metabolic process	1.219e-07	2.741e-05	202	1531
Cluster3	GO:0006888	endoplasmic reticulum to Golgi vesicle-mediated transport	1.259e-07	2.766e-05	37	159
Cluster3	GO:0016241	regulation of macroautophagy	1.331e-07	2.856e-05	41	186
Cluster3	GO:0031647	regulation of protein stability	1.433e-07	3.003e-05	66	368
Cluster3	GO:0002753	cytoplasmic pattern recognition receptor signaling pathway	1.812e-07	3.713e-05	41	188
Cluster3	GO:0000209	protein polyubiquitination	2.162e-07	4.335e-05	55	289
Cluster3	GO:0043436	oxoacid metabolic process	2.279e-07	4.472e-05	148	1058
Cluster3	GO:0032446	protein modification by small protein conjugation	2.419e-07	4.647e-05	129	893
Cluster3	GO:0002224	toll-like receptor signaling pathway	2.535e-07	4.771e-05	25	88
Cluster3	GO:0019752	carboxylic acid metabolic process	2.777e-07	5.123e-05	145	1035
Cluster3	GO:0032386	regulation of intracellular transport	2.926e-07	5.291e-05	58	314
Cluster3	GO:0006082	organic acid metabolic process	3.21e-07	5.693e-05	148	1064
Cluster3	GO:0045088	regulation of innate immune response	3.295e-07	5.735e-05	84	519
Cluster3	GO:1901135	carbohydrate derivative metabolic process	3.502e-07	5.982e-05	166	1226
Cluster3	GO:0043161	proteasome-mediated ubiquitin-dependent protein catabolic process	3.602e-07	6.041e-05	72	424
Cluster3	GO:0034655	nucleobase-containing compound catabolic process	4.168e-07	6.865e-05	105	696
Cluster3	GO:0032880	regulation of protein localization	4.314e-07	6.98e-05	150	1087
Cluster3	GO:0007249	canonical NF-kappaB signal transduction	7.208e-07	0.0001146	59	330
Cluster3	GO:0030522	intracellular receptor signaling pathway	7.379e-07	0.0001153	70	416
Cluster3	GO:0006913	nucleocytoplasmic transport	8.398e-07	0.000127	65	378
Cluster3	GO:0051169	nuclear transport	8.398e-07	0.000127	65	378
Cluster3	GO:0065003	protein-containing complex assembly	9.314e-07	0.0001354	231	1845
Cluster3	GO:0016054	organic acid catabolic process	9.395e-07	0.0001354	51	272
Cluster3	GO:0046395	carboxylic acid catabolic process	9.395e-07	0.0001354	51	272
Cluster3	GO:0016071	mRNA metabolic process	1.034e-06	0.0001467	129	917
Cluster3	GO:0009896	positive regulation of catabolic process	1.052e-06	0.000147	104	701
Cluster3	GO:0046486	glycerolipid metabolic process	1.156e-06	0.0001592	71	429
Cluster3	GO:0043122	regulation of canonical NF-kappaB signal transduction	1.372e-06	0.0001861	54	298
Cluster3	GO:0006753	nucleoside phosphate metabolic process	1.684e-06	0.0002251	102	691
Cluster3	GO:0032527	protein exit from endoplasmic reticulum	1.829e-06	0.000241	17	51
Cluster3	GO:0009117	nucleotide metabolic process	1.865e-06	0.0002422	101	684
Cluster3	GO:0045944	positive regulation of transcription by RNA polymerase II	2.115e-06	0.0002709	180	1390
Cluster3	GO:0006163	purine nucleotide metabolic process	2.276e-06	0.000286	93	619
Cluster3	GO:0009063	amino acid catabolic process	2.295e-06	0.000286	28	117
Cluster3	GO:0055086	nucleobase-containing small molecule metabolic process	2.658e-06	0.0003269	110	767
Cluster3	GO:0016310	phosphorylation	2.702e-06	0.0003279	225	1815
Cluster3	GO:0042254	ribosome biogenesis	2.841e-06	0.0003402	58	336
Cluster3	GO:0008610	lipid biosynthetic process	3.084e-06	0.0003647	115	813
Cluster3	GO:0019693	ribose phosphate metabolic process	3.243e-06	0.0003786	83	540
Cluster3	GO:0009074	aromatic amino acid family catabolic process	3.453e-06	0.0003981	11	24
Cluster3	GO:0009259	ribonucleotide metabolic process	3.578e-06	0.0004074	82	533
Cluster3	GO:0035196	miRNA processing	3.666e-06	0.0004123	16	48
Cluster3	GO:0072521	purine-containing compound metabolic process	3.782e-06	0.0004203	96	652
Cluster3	GO:0090407	organophosphate biosynthetic process	3.92e-06	0.0004304	95	644
Cluster3	GO:0051604	protein maturation	4.066e-06	0.0004412	92	619
Cluster3	GO:0000959	mitochondrial RNA metabolic process	4.457e-06	0.0004683	17	54
Cluster3	GO:0043603	amide metabolic process	4.459e-06	0.0004683	79	511
Cluster3	GO:0080134	regulation of response to stress	4.523e-06	0.0004683	208	1668
Cluster3	GO:0002757	immune response-activating signaling pathway	4.536e-06	0.0004683	84	553
Cluster3	GO:1903513	endoplasmic reticulum to cytosol transport	4.621e-06	0.0004683	12	29
Cluster3	GO:0030970	retrograde protein transport, ER to cytosol	4.621e-06	0.0004683	12	29
Cluster3	GO:0015931	nucleobase-containing compound transport	4.758e-06	0.0004736	46	249
Cluster3	GO:0045892	negative regulation of DNA-templated transcription	4.775e-06	0.0004736	179	1399
Cluster3	GO:0070201	regulation of establishment of protein localization	5.181e-06	0.0005083	98	674
Cluster3	GO:0031349	positive regulation of defense response	5.315e-06	0.0005106	88	589
Cluster3	GO:0002253	activation of immune response	5.315e-06	0.0005106	92	623
Cluster3	GO:0043123	positive regulation of canonical NF-kappaB signal transduction	5.417e-06	0.0005151	41	213
Cluster3	GO:0042147	retrograde transport, endosome to Golgi	5.553e-06	0.0005226	26	109
Cluster3	GO:0072594	establishment of protein localization to organelle	5.992e-06	0.0005582	79	515
Cluster3	GO:0016482	cytosolic transport	6.348e-06	0.0005855	32	150
Cluster3	GO:0050776	regulation of immune response	6.447e-06	0.0005887	144	1085
Cluster3	GO:0062207	regulation of pattern recognition receptor signaling pathway	6.816e-06	0.0006163	38	193
Cluster3	GO:0006397	mRNA processing	7.136e-06	0.0006382	83	551
Cluster3	GO:0045017	glycerolipid biosynthetic process	7.196e-06	0.0006382	48	268
Cluster3	GO:0090114	COPII-coated vesicle budding	7.357e-06	0.0006462	15	45
Cluster3	GO:1904951	positive regulation of establishment of protein localization	7.733e-06	0.0006729	65	403
Cluster3	GO:0007034	vacuolar transport	7.966e-06	0.0006866	37	187
Cluster3	GO:0010508	positive regulation of autophagy	8.332e-06	0.0007017	35	173
Cluster3	GO:0046496	nicotinamide nucleotide metabolic process	8.435e-06	0.0007017	39	202
Cluster3	GO:0019362	pyridine nucleotide metabolic process	8.435e-06	0.0007017	39	202
Cluster3	GO:0035966	response to topologically incorrect protein	8.445e-06	0.0007017	34	166
Cluster3	GO:0006520	amino acid metabolic process	8.532e-06	0.0007026	56	332
Cluster3	GO:1902679	negative regulation of RNA biosynthetic process	8.725e-06	0.0007121	179	1413
Cluster3	GO:0072524	pyridine-containing compound metabolic process	9.119e-06	0.0007378	40	210
Cluster3	GO:0016050	vesicle organization	1.058e-05	0.0008484	66	415
Cluster3	GO:0007033	vacuole organization	1.082e-05	0.0008602	45	249
Cluster3	GO:0090110	COPII-coated vesicle cargo loading	1.134e-05	0.000894	9	18
Cluster3	GO:0050778	positive regulation of immune response	1.149e-05	0.0008978	116	845
Cluster3	GO:0046434	organophosphate catabolic process	1.231e-05	0.0009487	49	281
Cluster3	GO:1900180	regulation of protein localization to nucleus	1.234e-05	0.0009487	35	176
Cluster3	GO:0006986	response to unfolded protein	1.298e-05	0.0009895	31	148
Cluster3	GO:0006644	phospholipid metabolic process	1.363e-05	0.001031	65	410
Cluster3	GO:0009199	ribonucleoside triphosphate metabolic process	1.385e-05	0.001037	50	290
Cluster3	GO:0070534	protein K63-linked ubiquitination	1.394e-05	0.001037	20	76
Cluster3	GO:0008380	RNA splicing	1.435e-05	0.001059	76	502
Cluster3	GO:0009150	purine ribonucleotide metabolic process	1.603e-05	0.001174	77	512
Cluster3	GO:0061024	membrane organization	1.618e-05	0.001175	123	914
Cluster3	GO:0002831	regulation of response to biotic stimulus	1.9e-05	0.001369	92	643
Cluster3	GO:0001889	liver development	2.023e-05	0.001446	38	202
Cluster3	GO:0006401	RNA catabolic process	2.088e-05	0.001482	67	432
Cluster3	GO:0009792	embryo development ending in birth or egg hatching	2.191e-05	0.001543	124	929
Cluster3	GO:1901606	alpha-amino acid catabolic process	2.27e-05	0.001579	24	104
Cluster3	GO:0006900	vesicle budding from membrane	2.277e-05	0.001579	22	91
Cluster3	GO:0043648	dicarboxylic acid metabolic process	2.408e-05	0.001657	25	111
Cluster3	GO:0071347	cellular response to interleukin-1	2.443e-05	0.001669	21	85
Cluster3	GO:0046034	ATP metabolic process	2.464e-05	0.001671	45	257
Cluster3	GO:0033157	regulation of intracellular protein transport	2.611e-05	0.001757	35	182
Cluster3	GO:0061008	hepaticobiliary system development	2.847e-05	0.001891	38	205
Cluster3	GO:0007005	mitochondrion organization	2.85e-05	0.001891	85	589
Cluster3	GO:0032103	positive regulation of response to external stimulus	2.924e-05	0.001926	102	738
Cluster3	GO:0051640	organelle localization	2.969e-05	0.001942	98	703
Cluster3	GO:0170035	L-amino acid catabolic process	3.148e-05	0.002033	20	80
Cluster3	GO:0009205	purine ribonucleoside triphosphate metabolic process	3.151e-05	0.002033	48	283
Cluster3	GO:0060149	negative regulation of post-transcriptional gene silencing	3.298e-05	0.002083	9	20
Cluster3	GO:1900369	negative regulation of post-transcriptional gene silencing by regulatory ncRNA	3.298e-05	0.002083	9	20
Cluster3	GO:0060967	negative regulation of gene silencing by regulatory ncRNA	3.298e-05	0.002083	9	20
Cluster3	GO:0008654	phospholipid biosynthetic process	3.37e-05	0.002115	46	268
Cluster3	GO:0031667	response to nutrient levels	3.411e-05	0.002126	82	566
Cluster3	GO:0010256	endomembrane system organization	3.763e-05	0.002329	94	672
Cluster3	GO:0038173	interleukin-17A-mediated signaling pathway	3.821e-05	0.002329	5	6
Cluster3	GO:0010901	regulation of very-low-density lipoprotein particle remodeling	3.821e-05	0.002329	5	6
Cluster3	GO:0006639	acylglycerol metabolic process	3.839e-05	0.002329	31	156
Cluster3	GO:0046822	regulation of nucleocytoplasmic transport	3.992e-05	0.002393	29	142
Cluster3	GO:0006325	chromatin organization	3.996e-05	0.002393	119	896
Cluster3	GO:0043009	chordate embryonic development	4.187e-05	0.002491	120	906
Cluster3	GO:0006778	porphyrin-containing compound metabolic process	4.264e-05	0.002521	17	63
Cluster3	GO:0051650	establishment of vesicle localization	4.312e-05	0.002533	40	224
Cluster3	GO:0000122	negative regulation of transcription by RNA polymerase II	4.419e-05	0.00258	136	1053
Cluster3	GO:0006403	RNA localization	4.613e-05	0.002674	39	217
Cluster3	GO:1905037	autophagosome organization	4.64e-05	0.002674	27	129
Cluster3	GO:0006638	neutral lipid metabolic process	4.954e-05	0.002838	31	158
Cluster3	GO:0007000	nucleolus organization	5.295e-05	0.003015	9	21
Cluster3	GO:1902532	negative regulation of intracellular signal transduction	5.683e-05	0.003215	107	795
Cluster3	GO:1900368	regulation of post-transcriptional gene silencing by regulatory ncRNA	6.016e-05	0.003363	12	36
Cluster3	GO:0035459	vesicle cargo loading	6.016e-05	0.003363	12	36
Cluster3	GO:0050821	protein stabilization	6.154e-05	0.003419	42	243
Cluster3	GO:0141188	nucleic acid catabolic process	6.2e-05	0.003424	69	464
Cluster3	GO:0009141	nucleoside triphosphate metabolic process	6.44e-05	0.003536	50	307
Cluster3	GO:0009144	purine nucleoside triphosphate metabolic process	6.48e-05	0.003537	48	291
Cluster3	GO:0009790	embryo development	6.954e-05	0.003773	176	1437
Cluster3	GO:0071824	protein-DNA complex organization	6.998e-05	0.003774	129	999
Cluster3	GO:0042176	regulation of protein catabolic process	7.129e-05	0.003821	62	407
Cluster3	GO:0042594	response to starvation	7.168e-05	0.003821	40	229
Cluster3	GO:1903716	guanine transmembrane transport	7.44e-05	0.003899	4	4
Cluster3	GO:0035340	inosine transport	7.44e-05	0.003899	4	4
Cluster3	GO:0015854	guanine transport	7.44e-05	0.003899	4	4
Cluster3	GO:0032092	positive regulation of protein binding	7.958e-05	0.004147	20	85
Cluster3	GO:0002764	immune response-regulating signaling pathway	8.032e-05	0.004162	86	615
Cluster3	GO:0062012	regulation of small molecule metabolic process	8.078e-05	0.004162	65	434
Cluster3	GO:0060147	regulation of post-transcriptional gene silencing	8.155e-05	0.004178	12	37
Cluster3	GO:0002755	MyD88-dependent toll-like receptor signaling pathway	8.223e-05	0.004184	9	22
Cluster3	GO:0042168	heme metabolic process	8.272e-05	0.004184	15	54
Cluster3	GO:0071826	protein-RNA complex organization	8.301e-05	0.004184	43	254
Cluster3	GO:0006997	nucleus organization	8.7e-05	0.00433	32	170
Cluster3	GO:0051168	nuclear export	8.732e-05	0.00433	34	185
Cluster3	GO:0170039	proteinogenic amino acid metabolic process	8.732e-05	0.00433	34	185
Cluster3	GO:0051648	vesicle localization	9.012e-05	0.004445	42	247
Cluster3	GO:0000041	transition metal ion transport	9.403e-05	0.004613	24	113
Cluster3	GO:0006547	L-histidine metabolic process	9.66e-05	0.004665	6	10
Cluster3	GO:0060397	growth hormone receptor signaling pathway via JAK-STAT	9.66e-05	0.004665	6	10
Cluster3	GO:0000183	rDNA heterochromatin formation	9.66e-05	0.004665	6	10
Cluster3	GO:0044790	suppression of viral release by host	0.0001023	0.004915	8	18
Cluster3	GO:0009064	glutamine family amino acid metabolic process	0.0001041	0.004975	19	80
Cluster3	GO:0009791	post-embryonic development	0.0001053	0.005008	27	135
Cluster3	GO:0000045	autophagosome assembly	0.0001086	0.005111	25	121
Cluster3	GO:0006536	glutamate metabolic process	0.0001092	0.005111	12	38
Cluster3	GO:0060966	regulation of gene silencing by regulatory ncRNA	0.0001092	0.005111	12	38
Cluster3	GO:0070918	regulatory ncRNA processing	0.000113	0.005265	18	74
Cluster3	GO:0006629	lipid metabolic process	0.0001136	0.005266	185	1536
Cluster3	GO:0051223	regulation of protein transport	0.0001157	0.005334	79	560
Cluster3	GO:0006468	protein phosphorylation	0.0001182	0.005424	192	1604
Cluster3	GO:1902369	negative regulation of RNA catabolic process	0.0001226	0.0056	22	101
Cluster3	GO:0032481	positive regulation of type I interferon production	0.0001243	0.005635	19	81
Cluster3	GO:0043543	protein acylation	0.0001249	0.005635	23	108
Cluster3	GO:0019216	regulation of lipid metabolic process	0.0001253	0.005635	62	415
Cluster3	GO:0007041	lysosomal transport	0.0001267	0.005674	29	151
Cluster3	GO:0140894	endolysosomal toll-like receptor signaling pathway	0.00013	0.005794	15	56
Cluster3	GO:0045333	cellular respiration	0.0001308	0.005799	44	267
Cluster3	GO:0032787	monocarboxylic acid metabolic process	0.0001334	0.005886	98	731
Cluster3	GO:0170040	proteinogenic amino acid catabolic process	0.0001359	0.005971	18	75
Cluster3	GO:1903829	positive regulation of protein localization	0.0001514	0.006619	82	591
Cluster3	GO:0070925	organelle assembly	0.0001538	0.006693	142	1138
Cluster3	GO:0044380	protein localization to cytoskeleton	0.0001556	0.006738	16	63
Cluster3	GO:0060965	negative regulation of miRNA-mediated gene silencing	0.0001623	0.006997	8	19
Cluster3	GO:0070498	interleukin-1-mediated signaling pathway	0.000165	0.00708	11	34
Cluster3	GO:0005975	carbohydrate metabolic process	0.0001677	0.007159	88	646
Cluster3	GO:0006457	protein folding	0.00017	0.007184	41	246
Cluster3	GO:1902652	secondary alcohol metabolic process	0.0001706	0.007184	32	176
Cluster3	GO:0051222	positive regulation of protein transport	0.0001707	0.007184	50	319
Cluster3	GO:1901137	carbohydrate derivative biosynthetic process	0.0001714	0.007184	98	736
Cluster3	GO:0009968	negative regulation of signal transduction	0.0001725	0.007199	190	1596
Cluster3	GO:0032434	regulation of proteasomal ubiquitin-dependent protein catabolic process	0.0001754	0.007287	27	139
Cluster3	GO:0044282	small molecule catabolic process	0.0001878	0.007769	62	421
Cluster3	GO:0000375	RNA splicing, via transesterification reactions	0.0001902	0.007832	55	362
Cluster3	GO:0170033	L-amino acid metabolic process	0.0001938	0.007942	36	208
Cluster3	GO:0007175	negative regulation of epidermal growth factor-activated receptor activity	0.0001948	0.007948	7	15
Cluster3	GO:1990700	nucleolar chromatin organization	0.0001958	0.007954	6	11
Cluster3	GO:2000058	regulation of ubiquitin-dependent protein catabolic process	0.0001975	0.007991	33	185
Cluster3	GO:0090207	regulation of triglyceride metabolic process	0.0001993	0.008026	15	58
Cluster3	GO:0009072	aromatic amino acid metabolic process	0.0002012	0.00807	13	46
Cluster3	GO:0051099	positive regulation of binding	0.0002025	0.008087	31	170
Cluster3	GO:0008203	cholesterol metabolic process	0.0002152	0.008555	30	163
Cluster3	GO:0036503	ERAD pathway	0.0002178	0.00862	24	119
Cluster3	GO:0070555	response to interleukin-1	0.0002211	0.008715	23	112
Cluster3	GO:0006412	translation	0.0002316	0.00909	107	824
Cluster3	GO:0051656	establishment of organelle localization	0.0002353	0.009196	76	546
Cluster3	GO:0006641	triglyceride metabolic process	0.0002417	0.009407	25	127
Cluster3	GO:0072698	protein localization to microtubule cytoskeleton	0.0002445	0.009475	15	59
Cluster3	GO:0032727	positive regulation of interferon-alpha production	0.0002475	0.009551	10	30
Cluster3	GO:0006606	protein import into nucleus	0.0002493	0.00958	34	195
Cluster3	GO:0016239	positive regulation of macroautophagy	0.0002518	0.009624	20	92
Cluster3	GO:0022900	electron transport chain	0.0002525	0.009624	27	142
Cluster3	GO:0032728	positive regulation of interferon-beta production	0.0002548	0.009669	13	47
Cluster3	GO:0000398	mRNA splicing, via spliceosome	0.0002602	0.009797	54	358
Cluster3	GO:0000377	RNA splicing, via transesterification reactions with bulged adenosine as nucleophile	0.0002602	0.009797	54	358
Cluster3	GO:1901605	alpha-amino acid metabolic process	0.0002636	0.009884	41	251
Cluster3	GO:0062208	positive regulation of pattern recognition receptor signaling pathway	0.0002735	0.01021	18	79
Cluster3	GO:1904823	purine nucleobase transmembrane transport	0.0003038	0.01117	5	8
Cluster3	GO:0006548	L-histidine catabolic process	0.0003038	0.01117	5	8
Cluster3	GO:0052805	imidazole-containing compound catabolic process	0.0003038	0.01117	5	8
Cluster3	GO:0033013	tetrapyrrole metabolic process	0.000304	0.01117	17	73
Cluster3	GO:0031347	regulation of defense response	0.0003081	0.01128	126	1006
Cluster3	GO:0039531	regulation of cytoplasmic pattern recognition receptor signaling pathway	0.0003107	0.01129	25	129
Cluster3	GO:0061136	regulation of proteasomal protein catabolic process	0.000312	0.01129	36	213
Cluster3	GO:0044283	small molecule biosynthetic process	0.0003121	0.01129	90	676
Cluster3	GO:0070646	protein modification by small protein removal	0.0003194	0.01151	27	144
Cluster3	GO:2001234	negative regulation of apoptotic signaling pathway	0.0003225	0.01157	45	286
Cluster3	GO:0050658	RNA transport	0.0003442	0.01217	31	175
Cluster3	GO:0050657	nucleic acid transport	0.0003442	0.01217	31	175
Cluster3	GO:2000583	regulation of platelet-derived growth factor receptor-alpha signaling pathway	0.0003444	0.01217	4	5
Cluster3	GO:0032238	adenosine transport	0.0003444	0.01217	4	5
Cluster3	GO:0032606	type I interferon production	0.0003583	0.0126	27	145
Cluster3	GO:0090084	negative regulation of inclusion body assembly	0.0003607	0.0126	6	12
Cluster3	GO:0034372	very-low-density lipoprotein particle remodeling	0.0003607	0.0126	6	12
Cluster3	GO:1903050	regulation of proteolysis involved in protein catabolic process	0.0003695	0.01286	41	255
Cluster3	GO:0051726	regulation of cell cycle	0.0003776	0.01309	152	1256
Cluster3	GO:0022411	cellular component disassembly	0.0003795	0.01311	83	617
Cluster3	GO:0006417	regulation of translation	0.0004043	0.01391	69	494
Cluster3	GO:0006605	protein targeting	0.0004077	0.01398	55	373
Cluster3	GO:0009615	response to virus	0.0004212	0.01436	61	425
Cluster3	GO:0016125	sterol metabolic process	0.0004219	0.01436	31	177
Cluster3	GO:0032388	positive regulation of intracellular transport	0.0004396	0.01491	29	162
Cluster3	GO:0051170	import into nucleus	0.0004442	0.01491	34	201
Cluster3	GO:0000956	nuclear-transcribed mRNA catabolic process	0.0004468	0.01491	25	132
Cluster3	GO:0035162	embryonic hemopoiesis	0.0004472	0.01491	10	32
Cluster3	GO:0042059	negative regulation of epidermal growth factor receptor signaling pathway	0.0004472	0.01491	10	32
Cluster3	GO:0046474	glycerophospholipid biosynthetic process	0.0004491	0.01491	36	217
Cluster3	GO:1901652	response to peptide	0.0004494	0.01491	135	1100
Cluster3	GO:0009261	ribonucleotide catabolic process	0.0004663	0.01536	31	178
Cluster3	GO:0051236	establishment of RNA localization	0.0004663	0.01536	31	178
Cluster3	GO:0016579	protein deubiquitination	0.0004679	0.01536	24	125
Cluster3	GO:0006739	NADP metabolic process	0.0004698	0.01536	14	56
Cluster3	GO:0045444	fat cell differentiation	0.0004741	0.01545	45	291
Cluster3	GO:0048524	positive regulation of viral process	0.0004763	0.01547	16	69
Cluster3	GO:0071539	protein localization to centrosome	0.0004902	0.01586	11	38
Cluster3	GO:0000463	maturation of LSU-rRNA from tricistronic rRNA transcript (SSU-rRNA, 5.8S rRNA, LSU-rRNA)	0.0004981	0.01601	7	17
Cluster3	GO:0034498	early endosome to Golgi transport	0.0004981	0.01601	7	17
Cluster3	GO:0015980	energy derivation by oxidation of organic compounds	0.0005112	0.01637	56	385
Cluster3	GO:0050790	regulation of catalytic activity	0.0005154	0.01645	201	1737
Cluster3	GO:0006896	Golgi to vacuole transport	0.0005328	0.01695	8	22
Cluster3	GO:0043604	amide biosynthetic process	0.0005561	0.01763	30	172
Cluster3	GO:0044093	positive regulation of molecular function	0.0005589	0.01765	169	1430
Cluster3	GO:0080135	regulation of cellular response to stress	0.0005676	0.01787	80	598
Cluster3	GO:0032101	regulation of response to external stimulus	0.0005792	0.01817	157	1316
Cluster3	GO:0018193	peptidyl-amino acid modification	0.0005983	0.01868	121	976
Cluster3	GO:0045834	positive regulation of lipid metabolic process	0.0005996	0.01868	29	165
Cluster3	GO:0034370	triglyceride-rich lipoprotein particle remodeling	0.0006173	0.01902	6	13
Cluster3	GO:0046166	glyceraldehyde-3-phosphate biosynthetic process	0.0006173	0.01902	6	13
Cluster3	GO:0006779	porphyrin-containing compound biosynthetic process	0.0006261	0.01902	11	39
Cluster3	GO:0033014	tetrapyrrole biosynthetic process	0.0006261	0.01902	11	39
Cluster3	GO:0035330	regulation of hippo signaling	0.0006261	0.01902	11	39
Cluster3	GO:1905508	protein localization to microtubule organizing center	0.0006261	0.01902	11	39
Cluster3	GO:0051090	regulation of DNA-binding transcription factor activity	0.0006266	0.01902	63	449
Cluster3	GO:2000378	negative regulation of reactive oxygen species metabolic process	0.0006277	0.01902	15	64
Cluster3	GO:0006650	glycerophospholipid metabolic process	0.0006291	0.01902	48	320
Cluster3	GO:0034976	response to endoplasmic reticulum stress	0.0006381	0.01922	45	295
Cluster3	GO:0006974	DNA damage response	0.0006399	0.01922	119	959
Cluster3	GO:0032655	regulation of interleukin-12 production	0.0006672	0.01998	16	71
Cluster3	GO:0032677	regulation of interleukin-8 production	0.0006722	0.02	21	106
Cluster3	GO:0045087	innate immune response	0.0006724	0.02	133	1092
Cluster3	GO:0006364	rRNA processing	0.000688	0.02034	37	230
Cluster3	GO:0019083	viral transcription	0.0006882	0.02034	14	58
Cluster3	GO:0042093	T-helper cell differentiation	0.0006995	0.02061	19	92
Cluster3	GO:1900182	positive regulation of protein localization to nucleus	0.0007358	0.02161	22	114
Cluster3	GO:0032897	negative regulation of viral transcription	0.00075	0.02196	7	18
Cluster3	GO:0046394	carboxylic acid biosynthetic process	0.0007593	0.02205	54	374
Cluster3	GO:0097190	apoptotic signaling pathway	0.00076	0.02205	92	713
Cluster3	GO:0032637	interleukin-8 production	0.0007644	0.02205	21	107
Cluster3	GO:0006783	heme biosynthetic process	0.0007651	0.02205	10	34
Cluster3	GO:0060964	regulation of miRNA-mediated gene silencing	0.0007651	0.02205	10	34
Cluster3	GO:0006338	chromatin remodeling	0.0007763	0.0223	95	741
Cluster3	GO:0032607	interferon-alpha production	0.0007918	0.0226	11	40
Cluster3	GO:1903791	uracil transmembrane transport	0.0008017	0.0226	3	3
Cluster3	GO:1903565	negative regulation of protein localization to cilium	0.0008017	0.0226	3	3
Cluster3	GO:1904082	pyrimidine nucleobase transmembrane transport	0.0008017	0.0226	3	3
Cluster3	GO:0051684	maintenance of Golgi location	0.0008017	0.0226	3	3
Cluster3	GO:0015857	uracil transport	0.0008017	0.0226	3	3
Cluster3	GO:0032088	negative regulation of NF-kappaB transcription factor activity	0.0008039	0.0226	19	93
Cluster3	GO:0007030	Golgi organization	0.0008087	0.02267	29	168
Cluster3	GO:1901292	nucleoside phosphate catabolic process	0.0008283	0.02315	35	216
Cluster3	GO:0009166	nucleotide catabolic process	0.0008332	0.02322	34	208
Cluster3	GO:0006897	endocytosis	0.0008763	0.02434	104	827
Cluster3	GO:0046854	phosphatidylinositol phosphate biosynthetic process	0.0008848	0.02451	15	66
Cluster3	GO:0009154	purine ribonucleotide catabolic process	0.0008913	0.02457	29	169
Cluster3	GO:0016032	viral process	0.0008923	0.02457	64	464
Cluster3	GO:0044872	lipoprotein localization	0.0009097	0.02497	9	29
Cluster3	GO:0016053	organic acid biosynthetic process	0.0009162	0.02506	54	377
Cluster3	GO:0032615	interleukin-12 production	0.00092	0.02506	16	73
Cluster3	GO:0002294	CD4-positive, alpha-beta T cell differentiation involved in immune response	0.0009213	0.02506	19	94
Cluster3	GO:1902373	negative regulation of mRNA catabolic process	0.0009348	0.02536	18	87
Cluster3	GO:0015864	pyrimidine nucleoside transport	0.0009568	0.0258	4	6
Cluster3	GO:0015862	uridine transmembrane transport	0.0009568	0.0258	4	6
Cluster3	GO:0034097	response to cytokine	0.0009621	0.02587	131	1083
Cluster3	GO:0046488	phosphatidylinositol metabolic process	0.0009812	0.02625	29	170
Cluster3	GO:0019080	viral gene expression	0.000982	0.02625	21	109
Cluster3	GO:0009395	phospholipid catabolic process	0.0009869	0.0263	14	60
Cluster3	GO:0046461	neutral lipid catabolic process	0.0009924	0.0263	11	41
Cluster3	GO:0046464	acylglycerol catabolic process	0.0009924	0.0263	11	41
Cluster3	GO:0052803	imidazole-containing compound metabolic process	0.0009955	0.02631	6	14
Cluster3	GO:0005996	monosaccharide metabolic process	0.001015	0.02675	46	310
Cluster3	GO:1905146	lysosomal protein catabolic process	0.001035	0.0272	8	24
Cluster3	GO:0032757	positive regulation of interleukin-8 production	0.001044	0.02734	15	67
Cluster3	GO:0006661	phosphatidylinositol biosynthetic process	0.00105	0.02736	24	132
Cluster3	GO:0006413	translational initiation	0.00105	0.02736	24	132
Cluster3	GO:0002293	alpha-beta T cell differentiation involved in immune response	0.001053	0.02736	19	95
Cluster3	GO:0043489	RNA stabilization	0.001075	0.0278	18	88
Cluster3	GO:0055088	lipid homeostasis	0.001076	0.0278	34	211
Cluster3	GO:0042306	regulation of protein import into nucleus	0.001083	0.02791	17	81
Cluster3	GO:1903232	melanosome assembly	0.001093	0.02808	7	19
Cluster3	GO:0022618	protein-RNA complex assembly	0.001096	0.02808	38	244
Cluster3	GO:0010038	response to metal ion	0.001107	0.02828	58	415
Cluster3	GO:0051174	regulation of phosphorus metabolic process	0.001116	0.02844	166	1423
Cluster3	GO:0046777	protein autophosphorylation	0.001138	0.0289	36	228
Cluster3	GO:0002292	T cell differentiation involved in immune response	0.001159	0.02922	20	103
Cluster3	GO:0060136	embryonic process involved in female pregnancy	0.001166	0.02922	5	10
Cluster3	GO:0032988	protein-RNA complex disassembly	0.001166	0.02922	5	10
Cluster3	GO:0071223	cellular response to lipoteichoic acid	0.001166	0.02922	5	10
Cluster3	GO:0070391	response to lipoteichoic acid	0.001166	0.02922	5	10
Cluster3	GO:1903008	organelle disassembly	0.001181	0.02952	33	204
Cluster3	GO:0042026	protein refolding	0.001193	0.02959	9	30
Cluster3	GO:0006541	glutamine metabolic process	0.001193	0.02959	9	30
Cluster3	GO:0039529	RIG-I signaling pathway	0.001193	0.02959	9	30
Cluster3	GO:0032479	regulation of type I interferon production	0.001214	0.03001	25	141
Cluster3	GO:0006473	protein acetylation	0.001226	0.03023	15	68
Cluster3	GO:0042180	ketone metabolic process	0.001235	0.03024	42	279
Cluster3	GO:0098542	defense response to other organism	0.001237	0.03024	164	1407
Cluster3	GO:0071345	cellular response to cytokine stimulus	0.001239	0.03024	118	967
Cluster3	GO:0071407	cellular response to organic cyclic compound	0.001239	0.03024	79	605
Cluster3	GO:0044419	biological process involved in interspecies interaction between organisms	0.001295	0.03151	224	1996
Cluster3	GO:0035329	hippo signaling	0.001303	0.03161	13	55
Cluster3	GO:0019058	viral life cycle	0.001349	0.03266	49	340
Cluster3	GO:0000470	maturation of LSU-rRNA	0.0014	0.0337	8	25
Cluster3	GO:0046782	regulation of viral transcription	0.0014	0.0337	8	25
Cluster3	GO:0019220	regulation of phosphate metabolic process	0.00141	0.03386	165	1421
Cluster3	GO:0046031	ADP metabolic process	0.001488	0.03564	22	120
Cluster3	GO:0010212	response to ionizing radiation	0.001521	0.03624	26	151
Cluster3	GO:0051092	positive regulation of NF-kappaB transcription factor activity	0.001521	0.03624	26	151
Cluster3	GO:0019627	urea metabolic process	0.001529	0.03626	6	15
Cluster3	GO:0071941	nitrogen cycle metabolic process	0.001529	0.03626	6	15
Cluster3	GO:0034138	toll-like receptor 3 signaling pathway	0.001545	0.03645	9	31
Cluster3	GO:0031053	primary miRNA processing	0.001547	0.03645	7	20
Cluster3	GO:0002287	alpha-beta T cell activation involved in immune response	0.001549	0.03645	19	98
Cluster3	GO:1901185	negative regulation of ERBB signaling pathway	0.001571	0.03677	10	37
Cluster3	GO:0032647	regulation of interferon-alpha production	0.001571	0.03677	10	37
Cluster3	GO:0002682	regulation of immune system process	0.001587	0.03705	207	1836
Cluster3	GO:0022406	membrane docking	0.001607	0.03743	18	91
Cluster3	GO:0006354	DNA-templated transcription elongation	0.001647	0.03826	25	144
Cluster3	GO:0009191	ribonucleoside diphosphate catabolic process	0.001662	0.03852	22	121
Cluster3	GO:0046503	glycerolipid catabolic process	0.001671	0.03858	15	70
Cluster3	GO:0048255	mRNA stabilization	0.001674	0.03858	16	77
Cluster3	GO:0071356	cellular response to tumor necrosis factor	0.00168	0.03858	36	233
Cluster3	GO:1901698	response to nitrogen compound	0.001682	0.03858	149	1272
Cluster3	GO:0016072	rRNA metabolic process	0.001687	0.03862	41	275
Cluster3	GO:0060627	regulation of vesicle-mediated transport	0.001704	0.0389	85	667
Cluster3	GO:0019318	hexose metabolic process	0.001748	0.03981	42	284
Cluster3	GO:0048732	gland development	0.001768	0.04013	73	558
Cluster3	GO:0046032	ADP catabolic process	0.001771	0.04013	21	114
Cluster3	GO:0097191	extrinsic apoptotic signaling pathway	0.001796	0.0406	39	259
Cluster3	GO:0032436	positive regulation of proteasomal ubiquitin-dependent protein catabolic process	0.001888	0.04257	17	85
Cluster3	GO:0001961	positive regulation of cytokine-mediated signaling pathway	0.001916	0.0431	14	64
Cluster3	GO:0060760	positive regulation of response to cytokine stimulus	0.00194	0.04353	15	71
Cluster3	GO:1903799	negative regulation of miRNA processing	0.001974	0.04409	5	11
Cluster3	GO:0046501	protoporphyrinogen IX metabolic process	0.001974	0.04409	5	11
Cluster3	GO:1901800	positive regulation of proteasomal protein catabolic process	0.002064	0.04574	22	123
Cluster3	GO:0060440	trachea formation	0.002068	0.04574	4	7
Cluster3	GO:0035790	platelet-derived growth factor receptor-alpha signaling pathway	0.002068	0.04574	4	7
Cluster3	GO:0015855	pyrimidine nucleobase transport	0.002068	0.04574	4	7
Cluster3	GO:0042177	negative regulation of protein catabolic process	0.002128	0.04692	23	131
Cluster3	GO:0042407	cristae formation	0.002137	0.04692	7	21
Cluster3	GO:1902236	negative regulation of endoplasmic reticulum stress-induced intrinsic apoptotic signaling pathway	0.002137	0.04692	7	21
Cluster3	GO:0045732	positive regulation of protein catabolic process	0.002158	0.04728	35	228
Cluster3	GO:0023057	negative regulation of signaling	0.002197	0.04757	196	1740
Cluster3	GO:0002684	positive regulation of immune system process	0.002197	0.04757	145	1242
Cluster3	GO:0051259	protein complex oligomerization	0.002199	0.04757	43	296
Cluster3	GO:0010628	positive regulation of gene expression	0.002206	0.04757	166	1446
Cluster3	GO:0090316	positive regulation of intracellular protein transport	0.002211	0.04757	21	116
Cluster3	GO:0006360	transcription by RNA polymerase I	0.002213	0.04757	16	79
Cluster3	GO:0046824	positive regulation of nucleocytoplasmic transport	0.002213	0.04757	16	79
Cluster3	GO:0045600	positive regulation of fat cell differentiation	0.002213	0.04757	16	79
Cluster3	GO:1903543	positive regulation of exosomal secretion	0.002256	0.04827	6	16
Cluster3	GO:0090153	regulation of sphingolipid biosynthetic process	0.002256	0.04827	6	16
Cluster3	GO:0009134	nucleoside diphosphate catabolic process	0.002293	0.04896	22	124
Cluster3	GO:0042981	regulation of apoptotic process	0.002328	0.0496	206	1841
Cluster3	GO:0051052	regulation of DNA metabolic process	0.002337	0.04967	73	564
Cluster3	GO:0051247	positive regulation of protein metabolic process	0.002351	0.04974	167	1458
Cluster3	GO:0022904	respiratory electron transport chain	0.002355	0.04974	23	132
Cluster3	GO:1901136	carbohydrate derivative catabolic process	0.002358	0.04974	46	323
Cluster3	GO:0046890	regulation of lipid biosynthetic process	0.002362	0.04974	37	246
Cluster3	GO:0010648	negative regulation of cell communication	0.002375	0.0498	196	1743
Cluster3	GO:1903828	negative regulation of protein localization	0.002376	0.0498	39	263
Cluster3	GO:0072523	purine-containing compound catabolic process	0.002381	0.04981	30	188
Cluster3	GO:0006259	DNA metabolic process	0.002387	0.04981	128	1081
Cluster4	GO:0002181	cytoplasmic translation	4.878e-31	2.928e-27	52	172
Cluster4	GO:0006412	translation	9.622e-29	2.888e-25	110	824
Cluster4	GO:0140236	translation at presynapse	4.399e-25	8.801e-22	27	49
Cluster4	GO:0140241	translation at synapse	9.198e-25	1.104e-21	27	50
Cluster4	GO:0140242	translation at postsynapse	9.198e-25	1.104e-21	27	50
Cluster4	GO:0032543	mitochondrial translation	2.353e-16	2.354e-13	32	133
Cluster4	GO:0140053	mitochondrial gene expression	8.114e-16	6.957e-13	36	176
Cluster4	GO:0042254	ribosome biogenesis	1.967e-15	1.476e-12	50	336
Cluster4	GO:0022613	ribonucleoprotein complex biogenesis	7.469e-14	4.981e-11	61	515
Cluster4	GO:0006364	rRNA processing	3.291e-10	1.975e-07	33	230
Cluster4	GO:0016072	rRNA metabolic process	6.983e-10	3.81e-07	36	275
Cluster4	GO:0065003	protein-containing complex assembly	1.363e-09	6.815e-07	128	1845
Cluster4	GO:0042274	ribosomal small subunit biogenesis	1.3e-08	6.004e-06	20	108
Cluster4	GO:0007005	mitochondrion organization	6.529e-08	2.799e-05	53	589
Cluster4	GO:0042273	ribosomal large subunit biogenesis	2.048e-07	8.197e-05	15	73
Cluster4	GO:0000028	ribosomal small subunit assembly	2.27e-07	8.514e-05	9	24
Cluster4	GO:0042255	ribosome assembly	1.496e-06	0.0005281	14	74
Cluster4	GO:0043414	macromolecule methylation	1.875e-06	0.0006253	20	145
Cluster4	GO:0001510	RNA methylation	5.328e-06	0.001683	14	82
Cluster4	GO:0036261	7-methylguanosine cap hypermethylation	5.661e-06	0.001699	5	8
Cluster4	GO:0033108	mitochondrial respiratory chain complex assembly	6.108e-06	0.001746	16	106
Cluster4	GO:0031163	metallo-sulfur cluster assembly	1.491e-05	0.003891	8	29
Cluster4	GO:0016226	iron-sulfur cluster assembly	1.491e-05	0.003891	8	29
Cluster4	GO:0060260	regulation of transcription initiation by RNA polymerase II	2.292e-05	0.005725	13	81
Cluster4	GO:0022618	protein-RNA complex assembly	2.385e-05	0.005725	25	244
Cluster4	GO:0090199	regulation of release of cytochrome c from mitochondria	2.837e-05	0.006548	10	50
Cluster4	GO:0032259	methylation	3.39e-05	0.007328	24	234
Cluster4	GO:0019646	aerobic electron transport chain	3.419e-05	0.007328	14	96
Cluster4	GO:0009451	RNA modification	3.541e-05	0.007328	20	176
Cluster4	GO:0071826	protein-RNA complex organization	4.663e-05	0.009329	25	254
Cluster4	GO:2000142	regulation of DNA-templated transcription initiation	8.043e-05	0.01557	13	91
Cluster4	GO:0007032	endosome organization	0.0001036	0.01944	14	106
Cluster4	GO:0060261	positive regulation of transcription initiation by RNA polymerase II	0.0001175	0.02138	11	70
Cluster4	GO:0042773	ATP synthesis coupled electron transport	0.0001271	0.02179	14	108
Cluster4	GO:0042775	mitochondrial ATP synthesis coupled electron transport	0.0001271	0.02179	14	108
Cluster4	GO:0051123	RNA polymerase II preinitiation complex assembly	0.000134	0.02235	11	71
Cluster4	GO:0051604	protein maturation	0.0001399	0.0227	45	619
Cluster4	GO:0106035	protein maturation by [4Fe-4S] cluster transfer	0.0001692	0.02673	4	8
Cluster4	GO:0070585	protein localization to mitochondrion	0.0002117	0.03258	16	141
Cluster4	GO:0090201	negative regulation of release of cytochrome c from mitochondria	0.0002526	0.03791	6	23
Cluster4	GO:0006626	protein targeting to mitochondrion	0.0002726	0.03991	14	116
Cluster4	GO:2000144	positive regulation of DNA-templated transcription initiation	0.0002801	0.04003	11	77
Cluster4	GO:0006839	mitochondrial transport	0.0002911	0.04063	20	205
Cluster4	GO:0001836	release of cytochrome c from mitochondria	0.0003233	0.04319	10	66
Cluster4	GO:0006119	oxidative phosphorylation	0.0003238	0.04319	17	161
Cluster4	GO:0036260	RNA capping	0.0003359	0.04383	5	16
Cluster4	GO:0072655	establishment of protein localization to mitochondrion	0.0003529	0.04506	15	133
Cluster5	GO:0071806	protein transmembrane transport	2.588e-06	0.01576	13	76
Cluster5	GO:2000435	negative regulation of protein neddylation	7.772e-06	0.02367	4	5
Cluster6	GO:0045893	positive regulation of DNA-templated transcription	6.616e-11	3.117e-07	186	1824
Cluster6	GO:1902680	positive regulation of RNA biosynthetic process	7.593e-11	3.117e-07	186	1827
Cluster6	GO:0006397	mRNA processing	1.926e-10	5.269e-07	76	551
Cluster6	GO:0016071	mRNA metabolic process	3.993e-09	7.508e-06	105	917
Cluster6	GO:0022613	ribonucleoprotein complex biogenesis	4.573e-09	7.508e-06	69	515
Cluster6	GO:0008380	RNA splicing	8.959e-09	1.226e-05	67	502
Cluster6	GO:0019637	organophosphate metabolic process	1.334e-08	1.564e-05	122	1142
Cluster6	GO:0042254	ribosome biogenesis	5.814e-08	5.966e-05	49	336
Cluster6	GO:0006364	rRNA processing	5.894e-07	0.0004607	36	230
Cluster6	GO:0065003	protein-containing complex assembly	6.056e-07	0.0004607	170	1845
Cluster6	GO:0045944	positive regulation of transcription by RNA polymerase II	6.173e-07	0.0004607	135	1390
Cluster6	GO:0006644	phospholipid metabolic process	8.708e-07	0.00055	53	410
Cluster6	GO:0000398	mRNA splicing, via spliceosome	9.954e-07	0.00055	48	358
Cluster6	GO:0000377	RNA splicing, via transesterification reactions with bulged adenosine as nucleophile	9.954e-07	0.00055	48	358
Cluster6	GO:0016072	rRNA metabolic process	1.005e-06	0.00055	40	275
Cluster6	GO:0043067	regulation of programmed cell death	1.335e-06	0.0006626	172	1895
Cluster6	GO:0000375	RNA splicing, via transesterification reactions	1.372e-06	0.0006626	48	362
Cluster6	GO:0042981	regulation of apoptotic process	2.014e-06	0.0009184	167	1841
Cluster6	GO:0033365	protein localization to organelle	3.747e-06	0.001619	108	1091
Cluster6	GO:0098657	import into cell	5.277e-06	0.002166	106	1074
Cluster6	GO:0045934	negative regulation of nucleobase-containing compound metabolic process	5.613e-06	0.002194	152	1673
Cluster6	GO:0034504	protein localization to nucleus	7.149e-06	0.002668	46	362
Cluster6	GO:0006396	RNA processing	8.387e-06	0.002993	138	1500
Cluster6	GO:0031123	RNA 3'-end processing	1.262e-05	0.004283	19	98
Cluster6	GO:0000460	maturation of 5.8S rRNA	1.304e-05	0.004283	11	37
Cluster6	GO:0019318	hexose metabolic process	1.361e-05	0.004298	38	284
Cluster6	GO:1901137	carbohydrate derivative biosynthetic process	1.464e-05	0.004327	77	736
Cluster6	GO:0006354	DNA-templated transcription elongation	1.476e-05	0.004327	24	144
Cluster6	GO:0006368	transcription elongation by RNA polymerase II	1.776e-05	0.005028	22	127
Cluster6	GO:0090383	phagosome acidification	2.022e-05	0.005424	5	7
Cluster6	GO:0000466	maturation of 5.8S rRNA from tricistronic rRNA transcript (SSU-rRNA, 5.8S rRNA, LSU-rRNA)	2.048e-05	0.005424	9	26
Cluster6	GO:0051253	negative regulation of RNA metabolic process	2.323e-05	0.005861	138	1531
Cluster6	GO:0045892	negative regulation of DNA-templated transcription	2.356e-05	0.005861	128	1399
Cluster6	GO:0046434	organophosphate catabolic process	2.513e-05	0.006067	37	281
Cluster6	GO:0045184	establishment of protein localization	3.113e-05	0.007302	168	1945
Cluster6	GO:0009135	purine nucleoside diphosphate metabolic process	3.302e-05	0.007326	22	132
Cluster6	GO:0009179	purine ribonucleoside diphosphate metabolic process	3.302e-05	0.007326	22	132
Cluster6	GO:0090407	organophosphate biosynthetic process	3.438e-05	0.007426	68	644
Cluster6	GO:1902679	negative regulation of RNA biosynthetic process	3.727e-05	0.007708	128	1413
Cluster6	GO:0002684	positive regulation of immune system process	3.756e-05	0.007708	115	1242
Cluster6	GO:0019319	hexose biosynthetic process	3.971e-05	0.007788	20	115
Cluster6	GO:0034655	nucleobase-containing compound catabolic process	3.985e-05	0.007788	72	696
Cluster6	GO:0005996	monosaccharide metabolic process	4.337e-05	0.00828	39	310
Cluster6	GO:0031647	regulation of protein stability	5.015e-05	0.00914	44	368
Cluster6	GO:0009137	purine nucleoside diphosphate catabolic process	5.122e-05	0.00914	20	117
Cluster6	GO:0009181	purine ribonucleoside diphosphate catabolic process	5.122e-05	0.00914	20	117
Cluster6	GO:0006897	endocytosis	5.314e-05	0.009282	82	827
Cluster6	GO:0042157	lipoprotein metabolic process	6.153e-05	0.01052	23	147
Cluster6	GO:0002682	regulation of immune system process	6.617e-05	0.01109	158	1836
Cluster6	GO:0002262	myeloid cell homeostasis	6.774e-05	0.01112	32	240
Cluster6	GO:0050684	regulation of mRNA processing	6.984e-05	0.01124	24	158
Cluster6	GO:0009132	nucleoside diphosphate metabolic process	7.619e-05	0.01203	23	149
Cluster6	GO:0034101	erythrocyte homeostasis	8.275e-05	0.0124	27	190
Cluster6	GO:0046364	monosaccharide biosynthetic process	8.346e-05	0.0124	20	121
Cluster6	GO:0009191	ribonucleoside diphosphate catabolic process	8.346e-05	0.0124	20	121
Cluster6	GO:0046488	phosphatidylinositol metabolic process	8.546e-05	0.0124	25	170
Cluster6	GO:0050821	protein stabilization	8.607e-05	0.0124	32	243
Cluster6	GO:0006006	glucose metabolic process	9.311e-05	0.01288	32	244
Cluster6	GO:0006913	nucleocytoplasmic transport	9.411e-05	0.01288	44	378
Cluster6	GO:0051169	nuclear transport	9.411e-05	0.01288	44	378
Cluster6	GO:0061615	glycolytic process through fructose-6-phosphate	9.874e-05	0.01311	9	31
Cluster6	GO:0000956	nuclear-transcribed mRNA catabolic process	9.899e-05	0.01311	21	132
Cluster6	GO:0019320	hexose catabolic process	0.0001046	0.01353	12	53
Cluster6	GO:0072526	pyridine-containing compound catabolic process	0.0001055	0.01353	20	123
Cluster6	GO:1902570	protein localization to nucleolus	0.0001111	0.01389	7	19
Cluster6	GO:1903241	U2-type prespliceosome assembly	0.0001127	0.01389	8	25
Cluster6	GO:0009185	ribonucleoside diphosphate metabolic process	0.0001137	0.01389	22	143
Cluster6	GO:0032784	regulation of DNA-templated transcription elongation	0.000115	0.01389	18	105
Cluster6	GO:0009134	nucleoside diphosphate catabolic process	0.0001183	0.01408	20	124
Cluster6	GO:0033173	calcineurin-NFAT signaling cascade	0.0001267	0.01466	12	54
Cluster6	GO:1901135	carbohydrate derivative metabolic process	0.000127	0.01466	111	1226
Cluster6	GO:0006281	DNA repair	0.0001304	0.01466	66	648
Cluster6	GO:0042158	lipoprotein biosynthetic process	0.0001304	0.01466	18	106
Cluster6	GO:0007264	small GTPase-mediated signal transduction	0.0001323	0.01468	57	538
Cluster6	GO:0006403	RNA localization	0.0001397	0.01529	29	217
Cluster6	GO:0030218	erythrocyte differentiation	0.0001503	0.01623	25	176
Cluster6	GO:0006506	GPI anchor biosynthetic process	0.0001682	0.01793	9	33
Cluster6	GO:0071824	protein-DNA complex organization	0.0001736	0.01827	93	999
Cluster6	GO:0006650	glycerophospholipid metabolic process	0.0001829	0.019	38	320
Cluster6	GO:0046365	monosaccharide catabolic process	0.0002186	0.02189	12	57
Cluster6	GO:0009150	purine ribonucleotide metabolic process	0.0002203	0.02189	54	512
Cluster6	GO:0006497	protein lipidation	0.0002216	0.02189	17	101
Cluster6	GO:0046031	ADP metabolic process	0.0002221	0.02189	19	120
Cluster6	GO:0002253	activation of immune response	0.000224	0.02189	63	623
Cluster6	GO:0046486	glycerolipid metabolic process	0.0002337	0.02257	47	429
Cluster6	GO:0006094	gluconeogenesis	0.0002374	0.02266	18	111
Cluster6	GO:0008654	phospholipid biosynthetic process	0.0002433	0.02296	33	268
Cluster6	GO:0006734	NADH metabolic process	0.0002516	0.02347	10	42
Cluster6	GO:0034243	regulation of transcription elongation by RNA polymerase II	0.0002593	0.0236	16	93
Cluster6	GO:0097720	calcineurin-mediated signaling	0.0002597	0.0236	12	58
Cluster6	GO:0019693	ribose phosphate metabolic process	0.0002617	0.0236	56	540
Cluster6	GO:0051235	maintenance of location	0.0002683	0.02394	44	396
Cluster6	GO:0006505	GPI anchor metabolic process	0.0002741	0.0242	9	35
Cluster6	GO:0006091	generation of precursor metabolites and energy	0.0002775	0.02423	55	529
Cluster6	GO:0006661	phosphatidylinositol biosynthetic process	0.0002813	0.02431	20	132
Cluster6	GO:0044093	positive regulation of molecular function	0.0003109	0.0263	124	1430
Cluster6	GO:0006002	fructose 6-phosphate metabolic process	0.0003139	0.0263	6	16
Cluster6	GO:0006000	fructose metabolic process	0.0003139	0.0263	6	16
Cluster6	GO:0034097	response to cytokine	0.000321	0.02662	98	1083
Cluster6	GO:0046032	ADP catabolic process	0.000333	0.02714	18	114
Cluster6	GO:0009259	ribonucleotide metabolic process	0.0003345	0.02714	55	533
Cluster6	GO:0048872	homeostasis of number of cells	0.0003373	0.02714	48	448
Cluster6	GO:0045647	negative regulation of erythrocyte differentiation	0.0003579	0.0283	5	11
Cluster6	GO:1901652	response to peptide	0.0003617	0.0283	99	1100
Cluster6	GO:0045646	regulation of erythrocyte differentiation	0.000362	0.0283	12	60
Cluster6	GO:0033043	regulation of organelle organization	0.0003746	0.02895	117	1342
Cluster6	GO:0070884	regulation of calcineurin-NFAT signaling cascade	0.0003773	0.02895	10	44
Cluster6	GO:0006974	DNA damage response	0.0004124	0.0311	88	959
Cluster6	GO:0030036	actin cytoskeleton organization	0.000413	0.0311	76	803
Cluster6	GO:0044283	small molecule biosynthetic process	0.0004261	0.0318	66	676
Cluster6	GO:0106056	regulation of calcineurin-mediated signaling	0.0004576	0.03357	10	45
Cluster6	GO:0006259	DNA metabolic process	0.000458	0.03357	97	1081
Cluster6	GO:0050778	positive regulation of immune response	0.0004635	0.03367	79	845
Cluster6	GO:0002757	immune response-activating signaling pathway	0.0004726	0.03393	56	553
Cluster6	GO:0051726	regulation of cell cycle	0.0004753	0.03393	110	1256
Cluster6	GO:1903311	regulation of mRNA metabolic process	0.000481	0.03404	47	443
Cluster6	GO:0031086	nuclear-transcribed mRNA catabolic process, deadenylation-independent decay	0.0005026	0.03504	4	7
Cluster6	GO:0032259	methylation	0.0005057	0.03504	29	234
Cluster6	GO:0050851	antigen receptor-mediated signaling pathway	0.000508	0.03504	28	223
Cluster6	GO:0007265	Ras protein signal transduction	0.000514	0.03516	19	128
Cluster6	GO:0071345	cellular response to cytokine stimulus	0.000537	0.03643	88	967
Cluster6	GO:0006163	purine nucleotide metabolic process	0.0005474	0.03683	61	619
Cluster6	GO:0019080	viral gene expression	0.0005575	0.03721	17	109
Cluster6	GO:0019364	pyridine nucleotide catabolic process	0.0005672	0.03755	18	119
Cluster6	GO:0050852	T cell receptor signaling pathway	0.0005754	0.03779	22	160
Cluster6	GO:0006096	glycolytic process	0.0006208	0.04045	17	110
Cluster6	GO:0044419	biological process involved in interspecies interaction between organisms	0.0006339	0.04097	163	1996
Cluster6	GO:0015931	nucleobase-containing compound transport	0.0006561	0.04208	30	249
Cluster6	GO:0043603	amide metabolic process	0.0006623	0.04215	52	511
Cluster6	GO:1901292	nucleoside phosphate catabolic process	0.0006793	0.04289	27	216
Cluster6	GO:0006325	chromatin organization	0.0006957	0.0436	82	896
Cluster6	GO:0070198	protein localization to chromosome, telomeric region	0.0007337	0.04514	8	32
Cluster6	GO:0006007	glucose catabolic process	0.0007337	0.04514	8	32
Cluster6	GO:0006090	pyruvate metabolic process	0.0007378	0.04514	20	142
Cluster6	GO:0000470	maturation of LSU-rRNA	0.000755	0.04514	7	25
Cluster6	GO:0061620	glycolytic process through glucose-6-phosphate	0.000755	0.04514	7	25
Cluster6	GO:0006753	nucleoside phosphate metabolic process	0.0007632	0.04514	66	691
Cluster6	GO:0030522	intracellular receptor signaling pathway	0.0007637	0.04514	44	416
Cluster6	GO:0030029	actin filament-based process	0.0007644	0.04514	83	912
Cluster6	GO:0043436	oxoacid metabolic process	0.00077	0.04515	94	1058
Cluster6	GO:0051168	nuclear export	0.000778	0.04529	24	185
Cluster6	GO:0019752	carboxylic acid metabolic process	0.0008604	0.04974	92	1035
Cluster7	GO:0043687	post-translational protein modification	3.475e-08	0.0002253	75	1074
Cluster7	GO:0070647	protein modification by small protein conjugation or removal	1.321e-07	0.0004282	70	1009
Cluster7	GO:0030163	protein catabolic process	1.296e-06	0.002801	72	1115
Cluster7	GO:0016567	protein ubiquitination	6.05e-06	0.007996	55	811
Cluster7	GO:0032446	protein modification by small protein conjugation	6.166e-06	0.007996	59	893
Cluster7	GO:0044248	cellular catabolic process	1.194e-05	0.01113	75	1253
Cluster7	GO:0051603	proteolysis involved in protein catabolic process	1.281e-05	0.01113	54	812
Cluster7	GO:0006631	fatty acid metabolic process	1.373e-05	0.01113	36	461
Cluster7	GO:0006629	lipid metabolic process	1.907e-05	0.01309	87	1536
Cluster7	GO:0006508	proteolysis	2.018e-05	0.01309	100	1833
Cluster7	GO:0032787	monocarboxylic acid metabolic process	5.326e-05	0.02942	48	731
Cluster7	GO:0007185	cell surface receptor protein tyrosine phosphatase signaling pathway	5.445e-05	0.02942	4	7
Cluster7	GO:0043632	modification-dependent macromolecule catabolic process	6.687e-05	0.03129	44	656
Cluster7	GO:0070646	protein modification by small protein removal	6.757e-05	0.03129	16	144
Cluster7	GO:0016192	vesicle-mediated transport	7.284e-05	0.03149	95	1778
Cluster7	GO:0006511	ubiquitin-dependent protein catabolic process	7.77e-05	0.03149	43	640
Cluster7	GO:0010876	lipid localization	9.451e-05	0.03605	39	565
Cluster7	GO:0019941	modification-dependent protein catabolic process	0.0001137	0.04097	43	651
Cluster8	GO:0030036	actin cytoskeleton organization	2.089e-12	1.074e-08	116	803
Cluster8	GO:0030029	actin filament-based process	2.447e-12	1.074e-08	127	912
Cluster8	GO:0097435	supramolecular fiber organization	1.333e-10	2.993e-07	126	957
Cluster8	GO:0030155	regulation of cell adhesion	1.365e-10	2.993e-07	123	927
Cluster8	GO:0040011	locomotion	1.723e-10	3.024e-07	180	1529
Cluster8	GO:0046649	lymphocyte activation	4.743e-10	6.755e-07	126	976
Cluster8	GO:0045321	leukocyte activation	5.39e-10	6.755e-07	146	1186
Cluster8	GO:0007155	cell adhesion	6.382e-10	7e-07	191	1675
Cluster8	GO:0001775	cell activation	9.577e-10	9.337e-07	161	1356
Cluster8	GO:0007015	actin filament organization	1.478e-09	1.297e-06	77	509
Cluster8	GO:0072359	circulatory system development	1.643e-09	1.311e-06	168	1442
Cluster8	GO:0030334	regulation of cell migration	2.251e-09	1.548e-06	146	1211
Cluster8	GO:0016477	cell migration	2.294e-09	1.548e-06	204	1847
Cluster8	GO:2000145	regulation of cell motility	2.926e-09	1.834e-06	152	1280
Cluster8	GO:0032970	regulation of actin filament-based process	4.634e-09	2.711e-06	68	438
Cluster8	GO:0040012	regulation of locomotion	6.309e-09	3.46e-06	155	1327
Cluster8	GO:0043067	regulation of programmed cell death	6.999e-09	3.612e-06	206	1895
Cluster8	GO:0032956	regulation of actin cytoskeleton organization	1.206e-08	5.848e-06	61	384
Cluster8	GO:0042981	regulation of apoptotic process	1.266e-08	5.848e-06	200	1841
Cluster8	GO:0033043	regulation of organelle organization	1.35e-08	5.924e-06	155	1342
Cluster8	GO:0007010	cytoskeleton organization	1.68e-08	7.021e-06	182	1645
Cluster8	GO:0045934	negative regulation of nucleobase-containing compound metabolic process	2.154e-08	8.441e-06	184	1673
Cluster8	GO:0044087	regulation of cellular component biogenesis	2.213e-08	8.441e-06	140	1189
Cluster8	GO:0030097	hemopoiesis	2.404e-08	8.789e-06	143	1223
Cluster8	GO:0035239	tube morphogenesis	4.018e-08	1.41e-05	133	1125
Cluster8	GO:0061061	muscle structure development	6.408e-08	2.162e-05	107	858
Cluster8	GO:0001558	regulation of cell growth	8.524e-08	2.77e-05	73	519
Cluster8	GO:0001944	vasculature development	8.987e-08	2.816e-05	117	969
Cluster8	GO:0001568	blood vessel development	1.025e-07	3.1e-05	113	929
Cluster8	GO:0022411	cellular component disassembly	1.665e-07	4.87e-05	82	617
Cluster8	GO:0045785	positive regulation of cell adhesion	1.913e-07	5.414e-05	78	579
Cluster8	GO:2000026	regulation of multicellular organismal development	2.039e-07	5.59e-05	192	1818
Cluster8	GO:0048514	blood vessel morphogenesis	2.311e-07	6.146e-05	101	817
Cluster8	GO:0009967	positive regulation of signal transduction	2.573e-07	6.579e-05	192	1824
Cluster8	GO:0002682	regulation of immune system process	2.625e-07	6.579e-05	193	1836
Cluster8	GO:0031589	cell-substrate adhesion	3.094e-07	7.475e-05	60	410
Cluster8	GO:0001525	angiogenesis	3.152e-07	7.475e-05	90	708
Cluster8	GO:0008630	intrinsic apoptotic signaling pathway in response to DNA damage	3.367e-07	7.773e-05	26	117
Cluster8	GO:0008284	positive regulation of cell population proliferation	3.502e-07	7.878e-05	135	1190
Cluster8	GO:0009719	response to endogenous stimulus	3.63e-07	7.944e-05	203	1960
Cluster8	GO:0035295	tube development	3.712e-07	7.944e-05	154	1402
Cluster8	GO:0051253	negative regulation of RNA metabolic process	4.629e-07	9.671e-05	165	1531
Cluster8	GO:0051249	regulation of lymphocyte activation	5.33e-07	0.0001088	80	614
Cluster8	GO:0016049	cell growth	5.635e-07	0.0001124	81	625
Cluster8	GO:0042770	signal transduction in response to DNA damage	5.776e-07	0.0001126	36	200
Cluster8	GO:0045595	regulation of cell differentiation	6.036e-07	0.0001151	203	1974
Cluster8	GO:0007219	Notch signaling pathway	6.983e-07	0.0001304	37	210
Cluster8	GO:0042110	T cell activation	7.318e-07	0.0001337	88	701
Cluster8	GO:0050790	regulation of catalytic activity	7.469e-07	0.0001337	182	1737
Cluster8	GO:0051493	regulation of cytoskeleton organization	7.68e-07	0.0001348	76	579
Cluster8	GO:0022407	regulation of cell-cell adhesion	8.214e-07	0.0001413	76	580
Cluster8	GO:0050865	regulation of cell activation	8.702e-07	0.0001453	93	756
Cluster8	GO:0051130	positive regulation of cellular component organization	8.779e-07	0.0001453	149	1366
Cluster8	GO:0002694	regulation of leukocyte activation	8.974e-07	0.0001453	87	694
Cluster8	GO:0006974	DNA damage response	9.109e-07	0.0001453	112	959
Cluster8	GO:0009968	negative regulation of signal transduction	1.013e-06	0.0001587	169	1596
Cluster8	GO:0048646	anatomical structure formation involved in morphogenesis	1.045e-06	0.0001608	159	1483
Cluster8	GO:0015820	L-leucine transport	1.193e-06	0.0001805	7	10
Cluster8	GO:2001233	regulation of apoptotic signaling pathway	1.321e-06	0.0001965	64	467
Cluster8	GO:0051247	positive regulation of protein metabolic process	1.503e-06	0.0002197	156	1458
Cluster8	GO:0022603	regulation of anatomical structure morphogenesis	1.566e-06	0.000223	123	1090
Cluster8	GO:0040008	regulation of growth	1.578e-06	0.000223	94	777
Cluster8	GO:1902680	positive regulation of RNA biosynthetic process	1.601e-06	0.000223	188	1827
Cluster8	GO:0008360	regulation of cell shape	1.802e-06	0.000247	30	159
Cluster8	GO:0110053	regulation of actin filament organization	2.01e-06	0.0002713	46	300
Cluster8	GO:0051094	positive regulation of developmental process	2.173e-06	0.0002849	175	1685
Cluster8	GO:0045893	positive regulation of DNA-templated transcription	2.175e-06	0.0002849	187	1824
Cluster8	GO:1903801	L-leucine import across plasma membrane	2.225e-06	0.0002871	5	5
Cluster8	GO:0033630	positive regulation of cell adhesion mediated by integrin	2.272e-06	0.000289	10	23
Cluster8	GO:0032943	mononuclear cell proliferation	2.326e-06	0.0002916	57	406
Cluster8	GO:0030335	positive regulation of cell migration	2.581e-06	0.000315	85	691
Cluster8	GO:0080135	regulation of cellular response to stress	2.638e-06	0.000315	76	598
Cluster8	GO:0040007	growth	2.647e-06	0.000315	135	1235
Cluster8	GO:0046651	lymphocyte proliferation	2.657e-06	0.000315	56	398
Cluster8	GO:0007264	small GTPase-mediated signal transduction	2.857e-06	0.0003342	70	538
Cluster8	GO:0023057	negative regulation of signaling	2.981e-06	0.0003442	179	1740
Cluster8	GO:0051129	negative regulation of cellular component organization	3.035e-06	0.0003458	101	864
Cluster8	GO:0010648	negative regulation of cell communication	3.317e-06	0.0003731	179	1743
Cluster8	GO:0098657	import into cell	3.429e-06	0.0003808	120	1074
Cluster8	GO:0051093	negative regulation of developmental process	3.625e-06	0.0003972	133	1220
Cluster8	GO:1902533	positive regulation of intracellular signal transduction	3.667e-06	0.0003972	140	1299
Cluster8	GO:0008380	RNA splicing	3.841e-06	0.0004109	66	502
Cluster8	GO:0080134	regulation of response to stress	4.126e-06	0.0004321	172	1668
Cluster8	GO:0006897	endocytosis	4.137e-06	0.0004321	97	827
Cluster8	GO:0007162	negative regulation of cell adhesion	4.276e-06	0.0004414	53	375
Cluster8	GO:0070661	leukocyte proliferation	4.741e-06	0.0004837	60	445
Cluster8	GO:0001667	ameboidal-type cell migration	4.872e-06	0.0004913	73	577
Cluster8	GO:0006935	chemotaxis	5.315e-06	0.0005299	67	517
Cluster8	GO:0050863	regulation of T cell activation	5.873e-06	0.0005781	61	458
Cluster8	GO:0000122	negative regulation of transcription by RNA polymerase II	5.93e-06	0.0005781	117	1053
Cluster8	GO:0042330	taxis	6.055e-06	0.0005838	67	519
Cluster8	GO:0050867	positive regulation of cell activation	6.294e-06	0.0006003	60	449
Cluster8	GO:0048729	tissue morphogenesis	6.515e-06	0.0006147	89	750
Cluster8	GO:0042692	muscle cell differentiation	6.798e-06	0.0006345	68	531
Cluster8	GO:0051241	negative regulation of multicellular organismal process	7.412e-06	0.0006845	155	1488
Cluster8	GO:0043069	negative regulation of programmed cell death	7.815e-06	0.0007142	127	1171
Cluster8	GO:0002696	positive regulation of leukocyte activation	8.278e-06	0.0007487	57	423
Cluster8	GO:0042098	T cell proliferation	8.517e-06	0.0007625	43	288
Cluster8	GO:0097190	apoptotic signaling pathway	8.799e-06	0.0007798	85	713
Cluster8	GO:1902679	negative regulation of RNA biosynthetic process	9.039e-06	0.0007931	148	1413
Cluster8	GO:0002521	leukocyte differentiation	9.276e-06	0.0008023	92	789
Cluster8	GO:1903131	mononuclear cell differentiation	9.327e-06	0.0008023	78	640
Cluster8	GO:2000147	positive regulation of cell motility	9.451e-06	0.0008051	86	725
Cluster8	GO:0030098	lymphocyte differentiation	9.914e-06	0.0008364	68	537
Cluster8	GO:0034765	regulation of monoatomic ion transmembrane transport	1.096e-05	0.0009158	56	417
Cluster8	GO:0044093	positive regulation of molecular function	1.11e-05	0.000919	149	1430
Cluster8	GO:0072331	signal transduction by p53 class mediator	1.139e-05	0.0009278	32	191
Cluster8	GO:0001893	maternal placenta development	1.142e-05	0.0009278	13	44
Cluster8	GO:1902903	regulation of supramolecular fiber organization	1.177e-05	0.0009474	58	438
Cluster8	GO:0044089	positive regulation of cellular component biogenesis	1.231e-05	0.0009815	72	582
Cluster8	GO:0045892	negative regulation of DNA-templated transcription	1.261e-05	0.0009969	146	1399
Cluster8	GO:0040017	positive regulation of locomotion	1.312e-05	0.001028	87	742
Cluster8	GO:0034446	substrate adhesion-dependent cell spreading	1.376e-05	0.001066	22	109
Cluster8	GO:0097193	intrinsic apoptotic signaling pathway	1.385e-05	0.001066	50	361
Cluster8	GO:0150146	cell junction disassembly	1.507e-05	0.001138	11	33
Cluster8	GO:0046697	decidualization	1.507e-05	0.001138	11	33
Cluster8	GO:0051054	positive regulation of DNA metabolic process	1.517e-05	0.001138	47	333
Cluster8	GO:0002685	regulation of leukocyte migration	1.597e-05	0.00118	40	267
Cluster8	GO:0030308	negative regulation of cell growth	1.606e-05	0.00118	34	212
Cluster8	GO:0071887	leukocyte apoptotic process	1.613e-05	0.00118	29	168
Cluster8	GO:0007507	heart development	1.627e-05	0.00118	88	757
Cluster8	GO:0006397	mRNA processing	2.304e-05	0.001657	68	551
Cluster8	GO:2001242	regulation of intrinsic apoptotic signaling pathway	2.397e-05	0.00171	34	216
Cluster8	GO:0050900	leukocyte migration	2.457e-05	0.001739	58	449
Cluster8	GO:0022409	positive regulation of cell-cell adhesion	2.531e-05	0.001776	52	389
Cluster8	GO:0043066	negative regulation of apoptotic process	2.605e-05	0.001807	121	1133
Cluster8	GO:0015803	branched-chain amino acid transport	2.616e-05	0.001807	7	14
Cluster8	GO:1901342	regulation of vasculature development	2.674e-05	0.001833	56	430
Cluster8	GO:1904062	regulation of monoatomic cation transmembrane transport	2.708e-05	0.001842	51	380
Cluster8	GO:0051146	striated muscle cell differentiation	2.91e-05	0.001964	52	391
Cluster8	GO:0051017	actin filament bundle assembly	2.943e-05	0.001968	31	191
Cluster8	GO:0010628	positive regulation of gene expression	2.979e-05	0.001968	148	1446
Cluster8	GO:0070663	regulation of leukocyte proliferation	2.983e-05	0.001968	46	332
Cluster8	GO:0015829	valine transport	3.009e-05	0.00197	4	4
Cluster8	GO:0000375	RNA splicing, via transesterification reactions	3.093e-05	0.00201	49	362
Cluster8	GO:0034762	regulation of transmembrane transport	3.332e-05	0.00215	71	589
Cluster8	GO:0002684	positive regulation of immune system process	3.357e-05	0.00215	130	1242
Cluster8	GO:0032233	positive regulation of actin filament bundle assembly	3.413e-05	0.00217	16	69
Cluster8	GO:0007159	leukocyte cell-cell adhesion	3.642e-05	0.002299	61	486
Cluster8	GO:0032944	regulation of mononuclear cell proliferation	3.82e-05	0.002391	43	306
Cluster8	GO:0051251	positive regulation of lymphocyte activation	3.843e-05	0.002391	51	385
Cluster8	GO:0007517	muscle organ development	3.957e-05	0.002445	56	436
Cluster8	GO:0002262	myeloid cell homeostasis	4.043e-05	0.002481	36	240
Cluster8	GO:1903037	regulation of leukocyte cell-cell adhesion	4.159e-05	0.002524	57	447
Cluster8	GO:0098609	cell-cell adhesion	4.171e-05	0.002524	115	1077
Cluster8	GO:0003013	circulatory system process	4.22e-05	0.002536	84	733
Cluster8	GO:0048872	homeostasis of number of cells	4.43e-05	0.002628	57	448
Cluster8	GO:0061572	actin filament bundle organization	4.433e-05	0.002628	31	195
Cluster8	GO:0001666	response to hypoxia	4.706e-05	0.002771	47	348
Cluster8	GO:0050870	positive regulation of T cell activation	4.979e-05	0.002912	41	290
Cluster8	GO:0014706	striated muscle tissue development	5.056e-05	0.002913	47	349
Cluster8	GO:0014070	response to organic cyclic compound	5.069e-05	0.002913	112	1048
Cluster8	GO:0022408	negative regulation of cell-cell adhesion	5.08e-05	0.002913	37	252
Cluster8	GO:0033628	regulation of cell adhesion mediated by integrin	5.136e-05	0.002926	13	50
Cluster8	GO:0045765	regulation of angiogenesis	5.249e-05	0.002971	54	420
Cluster8	GO:0032984	protein-containing complex disassembly	5.389e-05	0.003031	41	291
Cluster8	GO:0051261	protein depolymerization	5.473e-05	0.003056	25	144
Cluster8	GO:0050670	regulation of lymphocyte proliferation	5.514e-05	0.003056	42	301
Cluster8	GO:0010959	regulation of metal ion transport	5.538e-05	0.003056	61	493
Cluster8	GO:0060562	epithelial tube morphogenesis	5.597e-05	0.003069	54	421
Cluster8	GO:1901796	regulation of signal transduction by p53 class mediator	5.693e-05	0.003102	22	119
Cluster8	GO:0022604	regulation of cell morphogenesis	5.956e-05	0.003226	42	302
Cluster8	GO:0045926	negative regulation of growth	6.151e-05	0.003277	40	283
Cluster8	GO:0071495	cellular response to endogenous stimulus	6.164e-05	0.003277	165	1667
Cluster8	GO:0034330	cell junction organization	6.176e-05	0.003277	105	974
Cluster8	GO:0030099	myeloid cell differentiation	6.2e-05	0.003277	67	558
Cluster8	GO:0001885	endothelial cell development	6.454e-05	0.003391	17	80
Cluster8	GO:0048871	multicellular organismal-level homeostasis	6.503e-05	0.003397	111	1043
Cluster8	GO:1903829	positive regulation of protein localization	6.584e-05	0.003418	70	591
Cluster8	GO:1903169	regulation of calcium ion transmembrane transport	6.93e-05	0.003577	33	218
Cluster8	GO:0036293	response to decreased oxygen levels	7.179e-05	0.003684	48	364
Cluster8	GO:0003158	endothelium development	7.38e-05	0.003754	29	182
Cluster8	GO:0033993	response to lipid	7.403e-05	0.003754	118	1126
Cluster8	GO:0006816	calcium ion transport	7.628e-05	0.003846	62	509
Cluster8	GO:0051496	positive regulation of stress fiber assembly	7.965e-05	0.003993	14	59
Cluster8	GO:0031032	actomyosin structure organization	8.444e-05	0.004189	35	239
Cluster8	GO:0045597	positive regulation of cell differentiation	8.45e-05	0.004189	119	1141
Cluster8	GO:1903039	positive regulation of leukocyte cell-cell adhesion	8.774e-05	0.004325	43	317
Cluster8	GO:0048738	cardiac muscle tissue development	8.831e-05	0.004329	44	327
Cluster8	GO:0043068	positive regulation of programmed cell death	9.367e-05	0.004512	83	739
Cluster8	GO:0002064	epithelial cell development	9.393e-05	0.004512	38	269
Cluster8	GO:0016071	mRNA metabolic process	9.452e-05	0.004512	99	917
Cluster8	GO:0000398	mRNA splicing, via spliceosome	9.463e-05	0.004512	47	358
Cluster8	GO:0000377	RNA splicing, via transesterification reactions with bulged adenosine as nucleophile	9.463e-05	0.004512	47	358
Cluster8	GO:0043269	regulation of monoatomic ion transport	9.689e-05	0.004595	68	577
Cluster8	GO:0043065	positive regulation of apoptotic process	9.783e-05	0.004615	81	718
Cluster8	GO:0090130	tissue migration	0.0001023	0.004801	55	441
Cluster8	GO:0060317	cardiac epithelial to mesenchymal transition	0.0001111	0.005185	11	40
Cluster8	GO:0031099	regeneration	0.0001127	0.005234	36	252
Cluster8	GO:0031345	negative regulation of cell projection organization	0.0001136	0.005248	34	233
Cluster8	GO:0006476	protein deacetylation	0.0001201	0.005517	12	47
Cluster8	GO:0060485	mesenchyme development	0.0001225	0.005596	48	372
Cluster8	GO:0120035	regulation of plasma membrane bounded cell projection organization	0.0001286	0.005844	92	846
Cluster8	GO:0030857	negative regulation of epithelial cell differentiation	0.0001305	0.005903	15	69
Cluster8	GO:0007346	regulation of mitotic cell cycle	0.0001335	0.006008	69	594
Cluster8	GO:0002687	positive regulation of leukocyte migration	0.0001349	0.00604	28	179
Cluster8	GO:0015818	isoleucine transport	0.0001415	0.006304	4	5
Cluster8	GO:0003018	vascular process in circulatory system	0.0001434	0.006356	45	344
Cluster8	GO:0045216	cell-cell junction organization	0.0001512	0.006665	35	246
Cluster8	GO:0051235	maintenance of location	0.0001534	0.006728	50	396
Cluster8	GO:0002009	morphogenesis of an epithelium	0.0001577	0.006885	71	619
Cluster8	GO:0031344	regulation of cell projection organization	0.0001633	0.007091	93	863
Cluster8	GO:0048762	mesenchymal cell differentiation	0.000165	0.007129	40	296
Cluster8	GO:0065003	protein-containing complex assembly	0.0001731	0.007445	177	1845
Cluster8	GO:0006259	DNA metabolic process	0.0001769	0.007569	112	1081
Cluster8	GO:0051209	release of sequestered calcium ion into cytosol	0.0001835	0.007814	24	146
Cluster8	GO:0007266	Rho protein signal transduction	0.0001848	0.007834	26	164
Cluster8	GO:0051336	regulation of hydrolase activity	0.0001899	0.00801	94	878
Cluster8	GO:0010639	negative regulation of organelle organization	0.0001987	0.008318	52	421
Cluster8	GO:0060429	epithelium development	0.0001991	0.008318	145	1469
Cluster8	GO:0051283	negative regulation of sequestering of calcium ion	0.0002041	0.008471	24	147
Cluster8	GO:0010631	epithelial cell migration	0.0002054	0.008471	53	432
Cluster8	GO:0035051	cardiocyte differentiation	0.0002057	0.008471	32	221
Cluster8	GO:0043085	positive regulation of catalytic activity	0.000207	0.008487	107	1028
Cluster8	GO:2000106	regulation of leukocyte apoptotic process	0.0002188	0.008902	22	130
Cluster8	GO:0032880	regulation of protein localization	0.0002191	0.008902	112	1087
Cluster8	GO:0045911	positive regulation of DNA recombination	0.0002217	0.008963	16	80
Cluster8	GO:0070230	positive regulation of lymphocyte apoptotic process	0.0002244	0.009033	8	24
Cluster8	GO:0070588	calcium ion transmembrane transport	0.0002259	0.009049	49	392
Cluster8	GO:0009725	response to hormone	0.000227	0.009052	108	1042
Cluster8	GO:1901652	response to peptide	0.0002308	0.009165	113	1100
Cluster8	GO:0055080	monoatomic cation homeostasis	0.000242	0.009556	78	705
Cluster8	GO:1904018	positive regulation of vasculature development	0.0002429	0.009556	32	223
Cluster8	GO:0090132	epithelium migration	0.000244	0.009557	53	435
Cluster8	GO:0010638	positive regulation of organelle organization	0.0002473	0.009643	66	574
Cluster8	GO:0007566	embryo implantation	0.0002484	0.009644	18	97
Cluster8	GO:0045446	endothelial cell differentiation	0.0002512	0.009653	25	158
Cluster8	GO:0051282	regulation of sequestering of calcium ion	0.0002517	0.009653	24	149
Cluster8	GO:0050801	monoatomic ion homeostasis	0.0002519	0.009653	79	717
Cluster8	GO:0051052	regulation of DNA metabolic process	0.0002575	0.009825	65	564
Cluster8	GO:0045596	negative regulation of cell differentiation	0.0002635	0.01001	93	875
Cluster8	GO:0051056	regulation of small GTPase mediated signal transduction	0.000265	0.01001	43	333
Cluster8	GO:0032231	regulation of actin filament bundle assembly	0.0002658	0.01001	21	123
Cluster8	GO:0051924	regulation of calcium ion transport	0.0002675	0.01003	42	323
Cluster8	GO:0003198	epithelial to mesenchymal transition involved in endocardial cushion formation	0.000276	0.01029	7	19
Cluster8	GO:0033028	myeloid cell apoptotic process	0.0002768	0.01029	12	51
Cluster8	GO:0000018	regulation of DNA recombination	0.000279	0.0103	24	150
Cluster8	GO:1905168	positive regulation of double-strand break repair via homologous recombination	0.00028	0.0103	11	44
Cluster8	GO:0010810	regulation of cell-substrate adhesion	0.0002826	0.0103	35	254
Cluster8	GO:0007019	microtubule depolymerization	0.0002844	0.0103	14	66
Cluster8	GO:0034097	response to cytokine	0.0002855	0.0103	111	1083
Cluster8	GO:0000278	mitotic cell cycle	0.0002862	0.0103	105	1014
Cluster8	GO:0150115	cell-substrate junction organization	0.0002864	0.0103	20	115
Cluster8	GO:1903312	negative regulation of mRNA metabolic process	0.0002864	0.0103	20	115
Cluster8	GO:0060284	regulation of cell development	0.0002899	0.01038	112	1095
Cluster8	GO:0034616	response to laminar fluid shear stress	0.0002934	0.01047	6	14
Cluster8	GO:0042129	regulation of T cell proliferation	0.0003177	0.01129	33	236
Cluster8	GO:0060537	muscle tissue development	0.0003264	0.01155	64	558
Cluster8	GO:0008285	negative regulation of cell population proliferation	0.0003347	0.01176	100	961
Cluster8	GO:2000108	positive regulation of leukocyte apoptotic process	0.0003363	0.01176	10	38
Cluster8	GO:0061384	heart trabecula morphogenesis	0.0003363	0.01176	10	38
Cluster8	GO:0010569	regulation of double-strand break repair via homologous recombination	0.0003444	0.01199	16	83
Cluster8	GO:1901987	regulation of cell cycle phase transition	0.0003469	0.01203	60	516
Cluster8	GO:0031399	regulation of protein modification process	0.0003516	0.01215	145	1488
Cluster8	GO:0070848	response to growth factor	0.0003586	0.01234	93	883
Cluster8	GO:0050878	regulation of body fluid levels	0.0003607	0.01236	53	442
Cluster8	GO:0044839	cell cycle G2/M phase transition	0.0003632	0.0124	26	171
Cluster8	GO:0008015	blood circulation	0.0003656	0.01243	72	648
Cluster8	GO:0016032	viral process	0.0003758	0.01268	55	464
Cluster8	GO:0120032	regulation of plasma membrane bounded cell projection assembly	0.0003767	0.01268	34	248
Cluster8	GO:0051208	sequestering of calcium ion	0.0003771	0.01268	24	153
Cluster8	GO:0061515	myeloid cell development	0.0003901	0.01307	19	109
Cluster8	GO:0051726	regulation of cell cycle	0.0003979	0.01321	125	1256
Cluster8	GO:1905005	regulation of epithelial to mesenchymal transition involved in endocardial cushion formation	0.0003996	0.01321	4	6
Cluster8	GO:1905912	regulation of calcium ion export across plasma membrane	0.0003996	0.01321	4	6
Cluster8	GO:0035924	cellular response to vascular endothelial growth factor stimulus	0.0004007	0.01321	15	76
Cluster8	GO:0070665	positive regulation of leukocyte proliferation	0.0004063	0.01321	28	191
Cluster8	GO:0120187	positive regulation of protein localization to chromatin	0.0004066	0.01321	3	3
Cluster8	GO:1905532	regulation of L-leucine import across plasma membrane	0.0004066	0.01321	3	3
Cluster8	GO:0015821	methionine transport	0.0004066	0.01321	3	3
Cluster8	GO:0051651	maintenance of location in cell	0.0004095	0.01326	35	259
Cluster8	GO:0009887	animal organ morphogenesis	0.000414	0.01335	126	1269
Cluster8	GO:0045766	positive regulation of angiogenesis	0.0004155	0.01335	31	220
Cluster8	GO:0034695	response to prostaglandin E	0.0004171	0.01336	8	26
Cluster8	GO:0031570	DNA integrity checkpoint signaling	0.0004202	0.01341	23	145
Cluster8	GO:0030217	T cell differentiation	0.0004291	0.01364	47	382
Cluster8	GO:0042113	B cell activation	0.0004412	0.01394	43	341
Cluster8	GO:0007160	cell-matrix adhesion	0.0004417	0.01394	36	270
Cluster8	GO:0009790	embryo development	0.0004488	0.01411	140	1437
Cluster8	GO:0002683	negative regulation of immune system process	0.0004584	0.01431	70	631
Cluster8	GO:0045602	negative regulation of endothelial cell differentiation	0.0004584	0.01431	6	15
Cluster8	GO:0055008	cardiac muscle tissue morphogenesis	0.0004641	0.0144	15	77
Cluster8	GO:2000779	regulation of double-strand break repair	0.0004645	0.0144	23	146
Cluster8	GO:0044092	negative regulation of molecular function	0.0004701	0.01448	103	1005
Cluster8	GO:0060491	regulation of cell projection assembly	0.0004704	0.01448	34	251
Cluster8	GO:0060326	cell chemotaxis	0.0004779	0.01466	45	363
Cluster8	GO:0006925	inflammatory cell apoptotic process	0.0004981	0.01523	9	33
Cluster8	GO:0006873	intracellular monoatomic ion homeostasis	0.000502	0.01529	69	622
Cluster8	GO:0030330	DNA damage response, signal transduction by p53 class mediator	0.0005358	0.0162	15	78
Cluster8	GO:2000036	regulation of stem cell population maintenance	0.0005358	0.0162	15	78
Cluster8	GO:0050678	regulation of epithelial cell proliferation	0.0005373	0.0162	59	514
Cluster8	GO:0042060	wound healing	0.0005544	0.01666	57	493
Cluster8	GO:0043408	regulation of MAPK cascade	0.0005563	0.01666	86	815
Cluster8	GO:0019220	regulation of phosphate metabolic process	0.0005621	0.01678	138	1421
Cluster8	GO:0022613	ribonucleoprotein complex biogenesis	0.0005641	0.01678	59	515
Cluster8	GO:2000781	positive regulation of double-strand break repair	0.0005667	0.0168	17	95
Cluster8	GO:0000165	MAPK cascade	0.0005726	0.01692	96	930
Cluster8	GO:0006282	regulation of DNA repair	0.000576	0.01696	32	234
Cluster8	GO:0016055	Wnt signaling pathway	0.0005922	0.01736	59	516
Cluster8	GO:0070482	response to oxygen levels	0.0005941	0.01736	51	430
Cluster8	GO:0051174	regulation of phosphorus metabolic process	0.0005954	0.01736	138	1423
Cluster8	GO:1902905	positive regulation of supramolecular fiber organization	0.0006189	0.01798	28	196
Cluster8	GO:0072657	protein localization to membrane	0.000623	0.01798	76	705
Cluster8	GO:0071345	cellular response to cytokine stimulus	0.0006242	0.01798	99	967
Cluster8	GO:0044770	cell cycle phase transition	0.0006254	0.01798	69	627
Cluster8	GO:0045746	negative regulation of Notch signaling pathway	0.0006272	0.01798	11	48
Cluster8	GO:0060341	regulation of cellular localization	0.00063	0.01801	120	1212
Cluster8	GO:0070227	lymphocyte apoptotic process	0.0006326	0.01802	20	122
Cluster8	GO:1902749	regulation of cell cycle G2/M phase transition	0.0006359	0.01806	21	131
Cluster8	GO:0048878	chemical homeostasis	0.0006633	0.01877	123	1249
Cluster8	GO:0061138	morphogenesis of a branching epithelium	0.000668	0.01885	32	236
Cluster8	GO:0001890	placenta development	0.0006715	0.01888	28	197
Cluster8	GO:0032784	regulation of DNA-templated transcription elongation	0.0006742	0.0189	18	105
Cluster8	GO:0045862	positive regulation of proteolysis	0.0006771	0.01892	47	390
Cluster8	GO:0008593	regulation of Notch signaling pathway	0.0006943	0.01934	19	114
Cluster8	GO:0006874	intracellular calcium ion homeostasis	0.0006973	0.01936	44	359
Cluster8	GO:0097553	calcium ion transmembrane import into cytosol	0.0007028	0.01944	30	217
Cluster8	GO:0000956	nuclear-transcribed mRNA catabolic process	0.0007044	0.01944	21	132
[truncated: 261 more rows]
