# Supplementary material for: Toxicogenomic Insights into Environmental Toxicant Exposures: The TaRGET II Resource
Source: Research Square preprint supplement (doi:10.21203/rs.3.rs-7285514/v1), 2025-08-20

Supplementary Figure 9

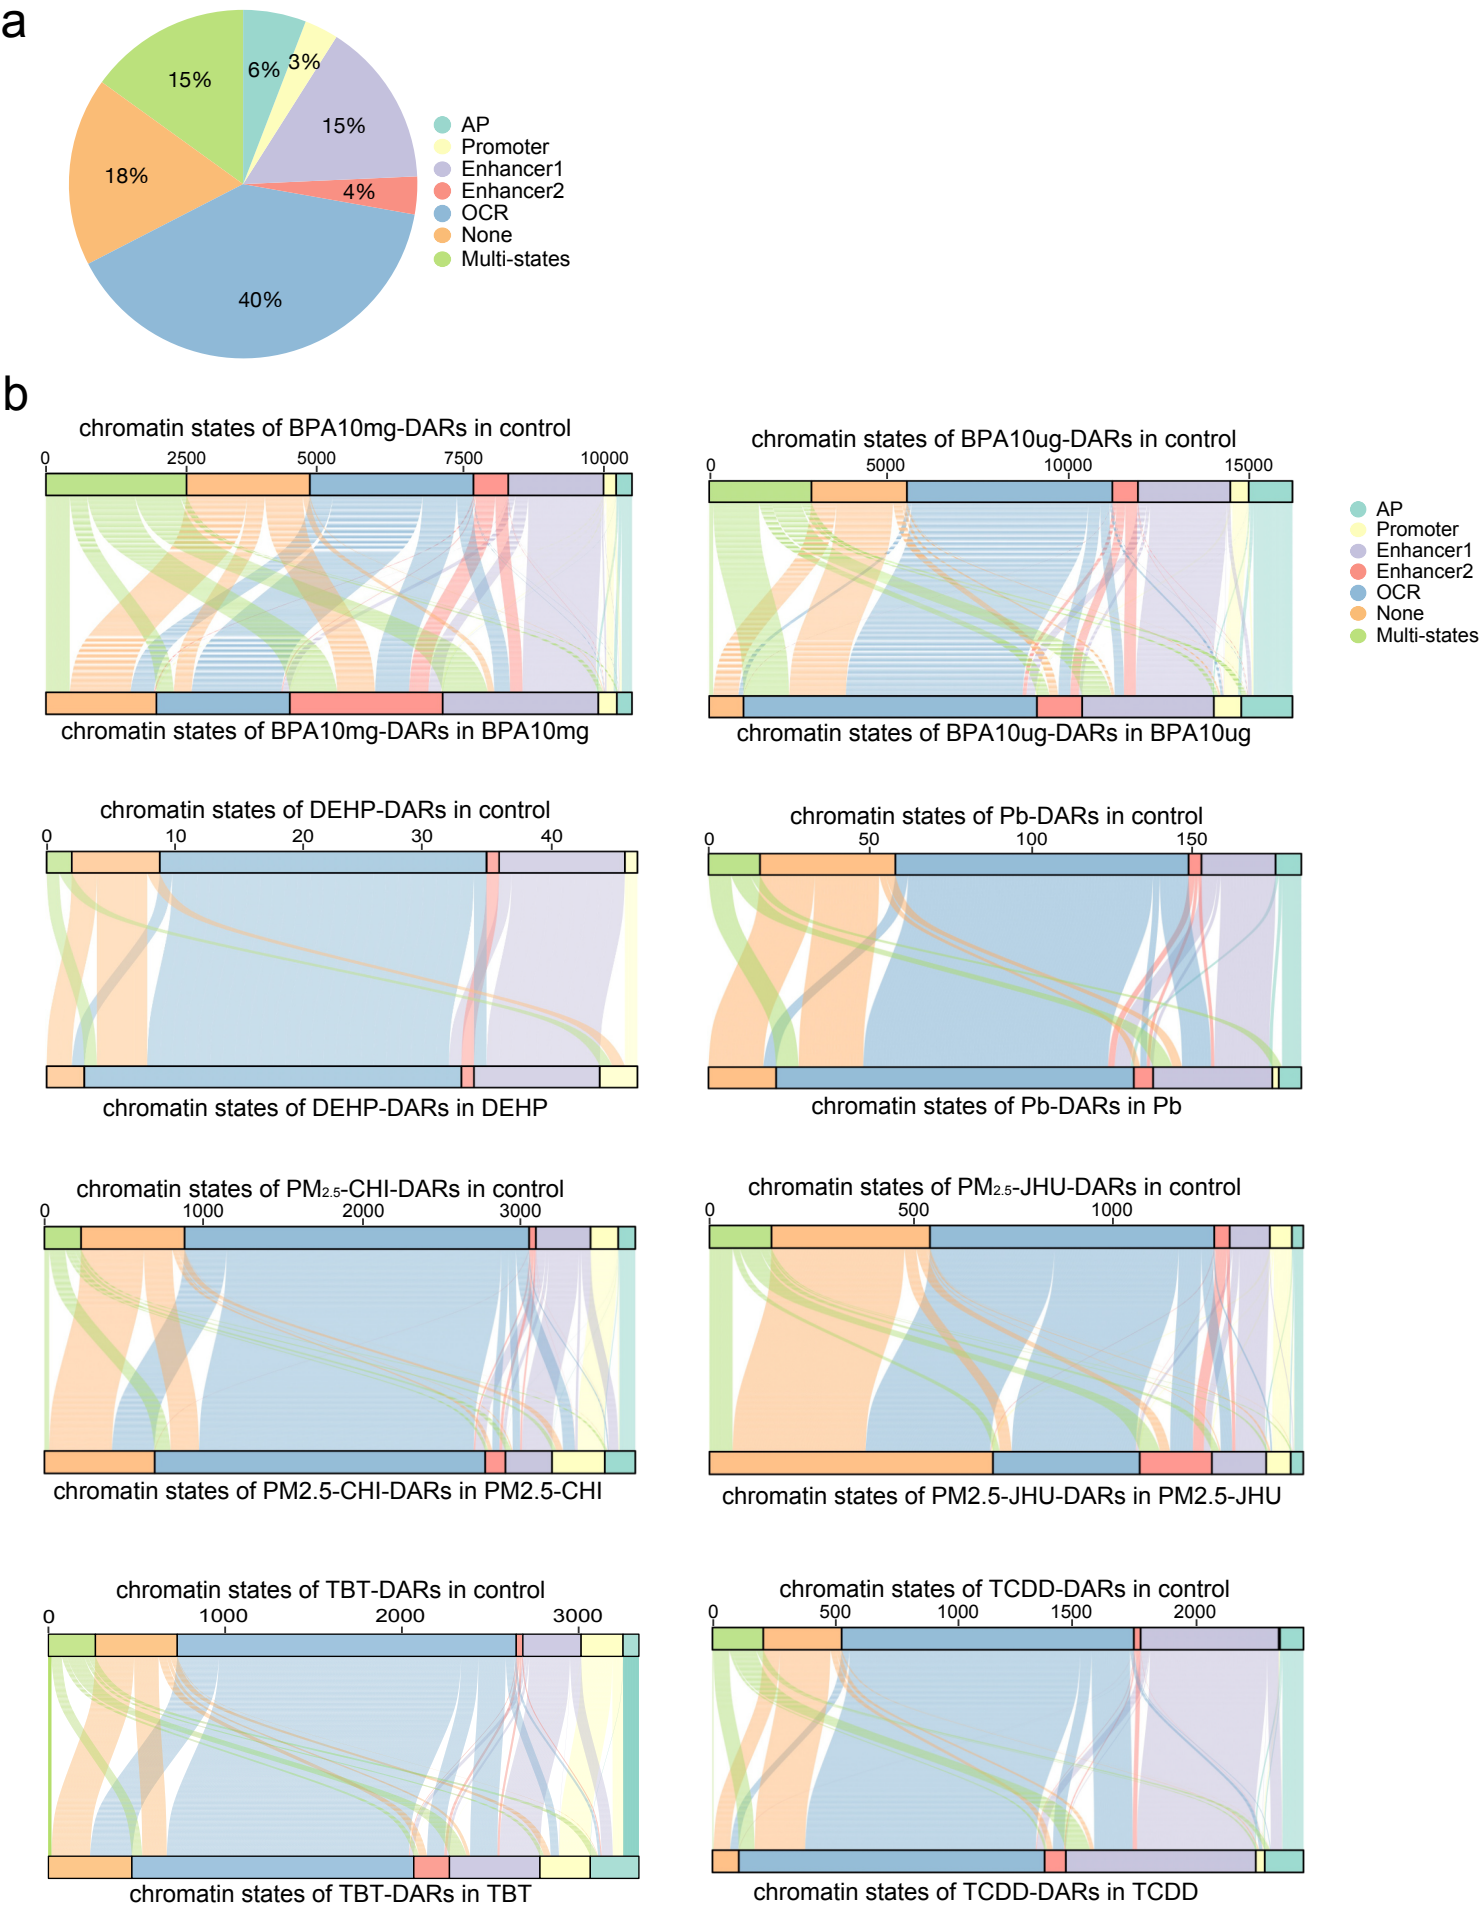

Supplement: Supplementary file [file ddb855064bb0c63b596e8954.pdf]
