# Supplementary material for: Toxicogenomic Insights into Environmental Toxicant Exposures: The TaRGET II Resource
Source: Research Square preprint supplement (doi:10.21203/rs.3.rs-7285514/v1), 2025-08-20

# Supplementary Figure 5

a

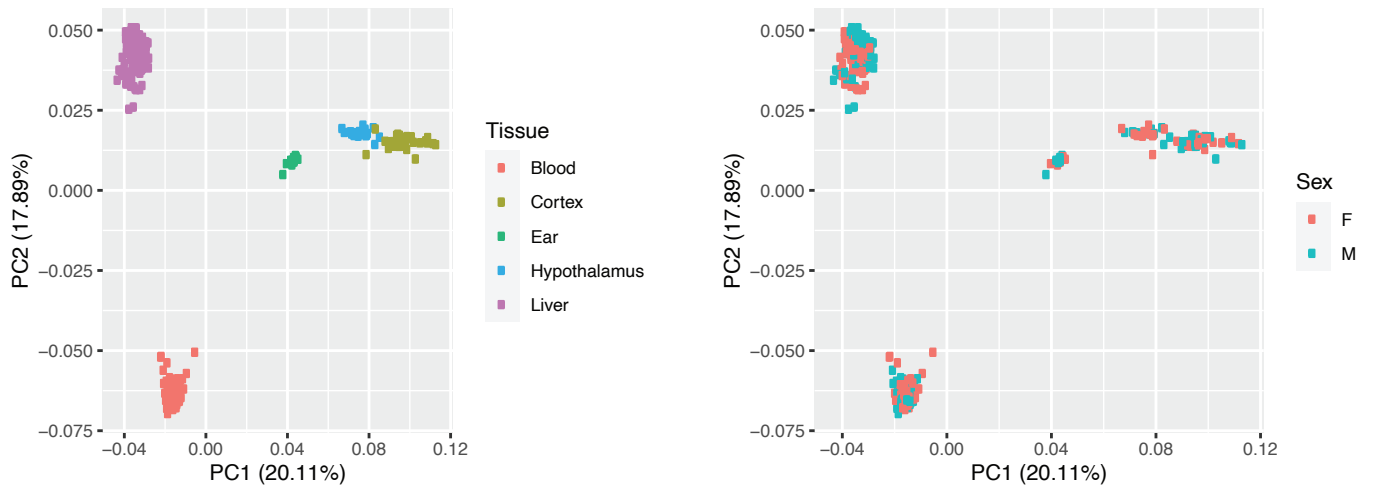

b

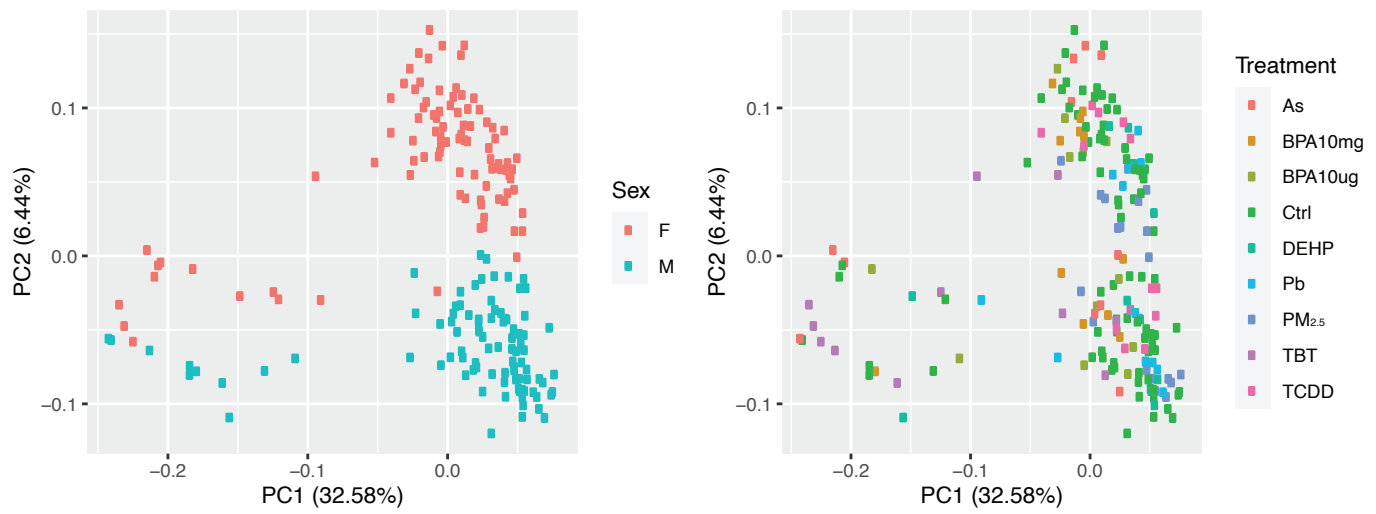

c

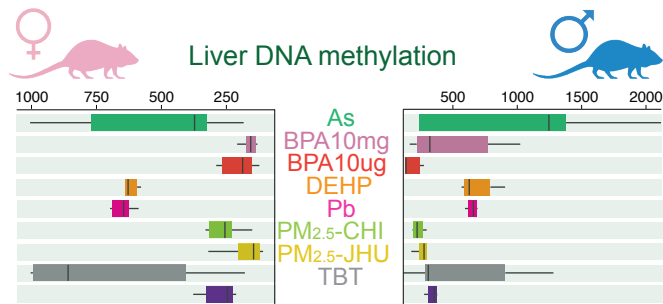

Supplement: Supplementary file [file ff6ccf069c437f0329b7eabd.pdf]
